# Supplementary material for: Organ-level protein networks as a reference for the host effects of the microbiome
Source: HighWire-hosted journal article supplement (doi:10.1101/gr.256875.119), 2020-01-28
Supplement: Supplemental_Materials.docx [file Supplemental_Materials.docx]

**Organ level protein networks as a reference for the host effects of the microbiome**

Robert H. Millsa,b,c,d, Jacob M. Wozniaka,b, Alison Vrbanacc, Anaamika Campeaua,b, Benoit Chassainge,f,g,h, Andrew Gewirtze, Rob Knightc,d, and David J. Gonzaleza,b,d,#

a Department of Pharmacology, University of California, San Diego, California, USA

b Skaggs School of Pharmacy and Pharmaceutical Sciences, University of California, San Diego, California, USA

c Department of Pediatrics, and Department of Computer Science and Engineering, University of California, San Diego California, USA

d Center for Microbiome Innovation, University of California, San Diego, California, USA

e Center for Inflammation, Immunity and Infection, Institute for Biomedical Sciences, Georgia State University, Atlanta, GA, USA

f Neuroscience Institute, Georgia State University, Atlanta, GA, USA

g INSERM, U1016, Paris, France.

h Université de Paris, Paris, France

# **Address Correspondence to:**

David J. Gonzalez, PhD

Department of Pharmacology and Pharmacy

University of California, San Diego

La Jolla, CA 92093

E-mail: djgonzalez@ucsd.edu

Phone: 858-822-1218

**Supplemental Materials**

**Supplemental Tables:**

Supplemental Table S1. Normalized Protein Quantitation Values with Statistical Analysis and UniProt Annotation Information.A spreadsheet is provided separately containing the protein quantitation values, statistics, and protein annotation information used in this study. Per sample protein quantitation is represented by normalized summed signal to noise ratios. The proteins used in our analyses are listed in the rows of the table by both their UniProt identifier and protein symbol. Statistical analysis of each protein’s association to GF status was performed through the supplemental source code and results are listed in the columns of this table for reference. Protein annotation information associated with each UniProt identifier is also provided in columns.

Supplemental Table S2. Per-Organ Gene Set Enrichments Related to Microbial Colonization State. The results from gene set enrichment analysis are provided in a multi-tab spreadsheet. Each tab contains statistics related to the functional enrichments within a given organ for either GF or conventional status.

| **Publication** | **Key Study Details** | **Related Findings** | **Our Findings** |
| --- | --- | --- | --- |
| (Mardinoglu et al. 2015) | Transcriptomic analysis of conventional and GF mouse tissue including subcutaneous fat, liver, duodenum, jejunum, ileum, and colon | Changes in oxidative stress, Higher *Nnt* gene expression in conventional intestinal and liver tissue, Predicted decreases in HDL secretion from small intestine, Differences in abundance of hepatic portal vein amino acids including increased tryptophan and decreased glutamine in GF mice. | A strong increase of NNT in all tissues analyzed, decreased HDL proteins in conventional heart tissue. Consistent findings with GLUD1 and GLS. |
| (Lichtman et al. 2016) | Proteomic analysis of GF, monocolonized, and conventional intestinal tissues | Responses to colonization state depend on intestinal location | Proteins associated with colonization in the small intestine were primarily increased in germ-free animals while proteins associated with colonization in the colon were primarily increased in conventional animals |
| (Larsson et al. 2012) | Transcriptional profiles of duodenum, jejunum, ileum and colon in germ-free conventional, and *Myd88*-/- mice | *Myd88* dependent expression of antimicrobial genes in the colon | Increased REG3G in conventional colon and small intestine, along with other proteins with roles in innate immunity |
| (El Aidy et al. 2013) | Time resolved transcriptional and metabolite analysis of the conventionalizing GF mice | Changes in glutamine and glutamate associated pathways and metabolites during colonization | Similar changes in glutamine and glutamate associated proteins; ASNS (increased in colonized intestinal tissues), ABAT1 (down in colonized colon). Similar gastrointestinal changes in carbohydrate metabolism proteins (SORD, SIS) |
| (Fu et al. 2017) | mRNA profiling of 303 xenobiotic-processing genes in four intestinal tissues and the liver | Changes in cytochrome P450 genes, as well as Phase II enzymes and xenobiotic transports | Similar changes in several xenobiotic metabolism transcripts in the gastrointestinal tract; Akr family proteins, Cyps, and decreases in conventional small intestines for proteins Ugt2a3, Gsta3, and Gsto1 |
| (Kuno et al. 2016) | Quantitative proteomics of the liver and kidney in GF, antibiotics-treated, and control mice | Changes in proteins related to mitochondrial proteins and drug-metabolizing enzymes | Related changes in the small intestines for drug metabolizing proteins and mitochondrial proteins through multiple tissues |
| (Kindt et al. 2018) | Transcriptomic, Proteomic, and Phosphoproteomic analysis of the liver and serum from GF and specific pathogen-free mice | Differences in the liver proteins related to PPAR signaling, fatty acid biosynthesis, retinol and drug metabolism pathways | Proteins increased in conventional small intestines related to lipid metabolism and drug metabolism, moderate enrichment for PPAR signaling proteins in the colon |

Supplemental Table S3. Summary of Related Findings from Previous Studies. A literature search was performed for transcript and protein-level studies previously performed on GF animals. A brief description of the study design, results, and findings relevant to our study were compiled into a table.

Supplemental Table S4. Ili-Compatible Table of Protein-Level Associations to Colonization. A comma-separated values table is provided for use with the online webserver ‘ili (<https://ili.embl.de>). Using this file in conjunction with Supplemental File S1 on the webserver will render an interactive 3D mouse model displaying protein-level associations to GF status.

Supplemental Table S5. Ili-Compatible Table of Pathway Associations to Colonization. A comma-separated values table is provided for use with the online webserver ‘ili (<https://ili.embl.de>). Using this file in conjunction with Supplemental File S1 on the webserver will render an interactive 3D mouse model displaying pathway-level associations to GF status.

**Supplemental Files:**

Supplemental File S1. Ili-Compatible 3D Mouse Visualization File

**Supplemental References**

El Aidy S, Derrien M, Merrifield CA, Levenez F, Dore J, Boekschoten MV, Dekker J, Holmes E, Zoetendal EG, van Baarlen P et al. 2013. Gut bacteria-host metabolic interplay during conventionalisation of the mouse germfree colon. *ISME J* **7**: 743-755.

Fu ZD, Selwyn FP, Cui JY, Klaassen CD. 2017. RNA-seq Profiling of Intestinal Expression of Xenobiotic Processing Genes in Germ-Free Mice. *Drug Metab Dispos* **45**: 1225-1238.

Kindt A, Liebisch G, Clavel T, Haller D, Hormannsperger G, Yoon H, Kolmeder D, Sigruener A, Krautbauer S, Seeliger C et al. 2018. The gut microbiota promotes hepatic fatty acid desaturation and elongation in mice. *Nat Commun* **9**: 3760.

Kuno T, Hirayama-Kurogi M, Ito S, Ohtsuki S. 2016. Effect of Intestinal Flora on Protein Expression of Drug-Metabolizing Enzymes and Transporters in the Liver and Kidney of Germ-Free and Antibiotics-Treated Mice. *Mol Pharm* **13**: 2691-2701.

Larsson E, Tremaroli V, Lee YS, Koren O, Nookaew I, Fricker A, Nielsen J, Ley RE, Backhed F. 2012. Analysis of gut microbial regulation of host gene expression along the length of the gut and regulation of gut microbial ecology through MyD88. *Gut* **61**: 1124-1131.

Lichtman JS, Alsentzer E, Jaffe M, Sprockett D, Masutani E, Ikwa E, Fragiadakis GK, Clifford D, Huang BE, Sonnenburg JL et al. 2016. The effect of microbial colonization on the host proteome varies by gastrointestinal location. *ISME J* **10**: 1170-1181.

Mardinoglu A, Shoaie S, Bergentall M, Ghaffari P, Zhang C, Larsson E, Backhed F, Nielsen J. 2015. The gut microbiota modulates host amino acid and glutathione metabolism in mice. *Mol Syst Biol* **11**: 834.
