# Supplementary material for: Organ-level protein networks as a reference for the host effects of the microbiome
Source: HighWire-hosted journal article supplement (doi:10.1101/gr.256875.119), 2020-01-28
Supplement: Supplemental_Table_S1_JDedit.xlsx [file Supplemental_Table_S1_JDedit.xlsx]

## Sheet: Table_S1.csv
Supplemental Table S1. Normalized Protein Quantitation Values with Statistical Analysis and UniProt Annotation Information.
Gene Identifiers		Statistical Enrichment Scores Per Organ					Sample Quantitation Values (Normalized Summed Signal to Noise Ratios)																														Statistics
UniprotID	Protein Name	SI_Control/SI_Germ_Free pi score	Col_Control/Col_Germ_Free pi score	Sp_Control/Sp_Germ_Free pi score	He_Control/He_Germ_Free pi score	Brain_Control/Brain_Germ_Free pi score	Br_C1	Br_C2	Br_C3	Br_GF1	Br_GF2	Br_GF3	Col_C1	Sp_GF3	SI_C1	Col_GF1	He_C1	He_GF2	SI_GF3	SI_GF1	Sp_C1	Col_C3	SI_C3	He_C2	Col_GF2	Sp_GF2	He_GF1	He_GF3	Sp_C2	SI_C2	Sp_GF1	Col_GF3	Sp_C3	He_C3	Col_C2	SI_GF2	t-test pvalue colon	Col Control Mean	Col Germ-Free Mean	Fold Change(Col Control/Col Germ-Free)	t-test pvalue spleen	Sp Control Mean	Sp Germ-Free Mean	Fold Change(Sp Control/Sp Germ-Free)	t-test pvalue small intestine	SI Control Mean	SI Germ-Free Mean	Fold Change(SI Control/SI Germ-Free)	t-test pvalue Heart
Q80ZQ9	ABITRAM	0.302332	0.0988393	-0.156056	-0.00937615								273.69	155.387	218.176	169.587	80.9943	77.5084	155.725	139.289	145.342	144.996	145.012	179.251	183.183	208.49	196.362	125.541	135.578	200.697	131.972	275.395	121.771	108.165	376.324	134.1	0.511858	265.003	209.388	1.26561	0.302136	134.231	165.283	0.812126	0.170897	187.962	143.038	1.31407	0.830925
P00688	AMY2A5	3.43595	2.24422	1.43253	3.43595								445.41	7.56228	105.751	14.8215	24.1584	24.0352	22.1775	21.2458	69.0699	630.64	197.17	172.181	53.6085	61.3599	118.52	142.381	1241.05	150.042	40.7363	59.226	45.8026	116.145	47.5429	43.7971	0.192653	374.531	42.552	8.80173	0.402872	451.973	36.5528	12.3649	0.0358338	150.988	29.0735	5.19332	0.878533
Q91XA9	CHIA1	-0.198692	-5.11312	-0.0175124	-0.126768								21.0403	51.4948	186.442	442.296	67.5931	72.6564	434.823	293.307	216.943	187.7	287.895	469.915	759.787	237.49	608.216	426.621	20.2745	376.639	10.475	530.376	9.61003	220.26	25.0666	374.228	0.0169983	77.9358	577.486	0.134957	0.865367	82.2757	99.8198	0.824242	0.29369	283.658	367.453	0.771959	0.586741
Q9D881	COX5B-PS	-0.876105	-0.604916	-0.467145	0.0153594	-0.0145938	457.269	618.126	320.615	580.53	337.479	598.65	103.023	123.859	134.521	516.155	1047.87	900.38	174.452	285.468	58.8116	219.488	142.798	899.833	224.333	71.7061	646.738	620.084	37.1508	118.773	41.4227	249.205	35.923	425.688	193.479	235.631	0.227104	171.997	329.898	0.521364	0.280228	43.9618	78.9959	0.556507	0.0834594	132.031	231.85	0.569466	0.763585
Q7TMC8	FCSK	-0.0102376	0.0866315	-0.114756	-0.118382	0.0210147	492.143	471.09	553.675	450.859	533.206	456.497	350.942	83.592	226.082	269.097	136.357	163.349	262.209	272.315	56.8419	325.949	269.749	80.558	383.627	63.1118	112.434	114.978	50.875	177.746	49.9578	291.35	55.5706	104.989	401.045	179.128	0.352487	359.312	314.691	1.14179	0.373497	54.4292	65.5539	0.830297	0.753717	224.526	237.884	0.943848	0.377305
Q01514	GBP2B	0.557703	0.115717	-0.855769	0.230818								112.985	90.305	427.095	81.2041	116.894	100.988	329.112	328.709	70.8743	78.9265	644.033	89.9205	72.1563	89.0523	78.8277	99.8663	52.3258	476.297	84.0487	79.3415	56.5888	175.076	82.5	370.615	0.326213	91.4704	77.5673	1.17924	0.0279793	59.9296	87.802	0.682554	0.11319	515.808	342.812	1.50464	0.306445
Q3UYH7	GRK3	-0.0198701	0.000734295	0.00166767	0.212987	-0.00291089	527.345	466.526	471.884	490.832	499.524	497.936	288.952	268.912	217.53	303.305	875.9	478.692	162.171	255.031	350.667	122.642	124.598	76.9478	99.6768	397.962	85.8246	43.6711	307.368	141.059	279.405	182.418	309.171	183.441	188.223	119.259	0.952969	199.939	195.133	1.02463	0.885426	322.402	315.427	1.02211	0.738443	161.062	178.82	0.900693	0.580502
Q9D8T2	GSDMD	-0.629498	0.00051758	-0.000163241	0.28488								148.354	157.46	178.891	213.778	179.241	207.71	236.344	481.034	165.324	230.953	296.166	39.7178	164.16	146.244	43.3915	51.1555	164.655	207.386	181.277	76.5134	152.627	327.337	84.4647	458.49	0.960123	154.59	151.484	1.02051	0.94832	160.869	161.661	0.995102	0.157774	227.481	391.956	0.580374	0.463851
P43275	H1F1	-0.0857985	-0.230595	-0.292077	0.0858613	-0.0478449	559.688	539.962	262.189	578.862	391.167	601.184	29.878	765.266	93.0751	119.807	40.0035	49.264	98.9493	144.423	420.578	73.1009	146.817	155.047	66.3077	402.766	53.2978	126.141	395.848	85.5366	523.147	55.9225	379.345	104.64	64.8906	143.39	0.365745	55.9565	80.6792	0.693568	0.260585	398.59	563.726	0.707063	0.452457	108.476	128.921	0.841417	0.60234
Q80ZM5	H1F10	0.0060058	0.00420062	-0.061729	0.00601741	0.0833023	550.542	404.156	655.56	417.147	544.054	417.97	178.759	262.378	332.72	144.797	222.458	301.406	309.979	253.378	209.098	214.911	340.807	59.4977	161.603	201.103	83.2005	28.0577	209.601	291.878	366.584	175.617	292.961	170.03	108.755	367.198	0.850724	167.475	160.672	1.04234	0.527213	237.22	276.689	0.857355	0.770504	321.802	310.185	1.03745	0.899858
P15864	H1F2	-0.0809941	-0.455932	-0.108402	-0.110079	-0.135279	446.407	581.118	246.102	638.136	389.626	591.559	50.7602	582.702	109.367	148.288	54.2553	51.9961	99.7674	179.205	493.877	118.622	188.214	63.2876	114.186	360.814	56.2824	93.2272	342.492	76.7608	519.696	92.4374	387.012	45.3986	57.9507	181.963	0.195231	75.7775	118.304	0.640533	0.380422	407.794	487.737	0.836093	0.537287	124.781	153.645	0.812135	0.437334
P43274	H1F4	-0.3163	-0.359901	-0.0858932	-0.0974829	-0.277441	441.984	520.595	262.512	636.156	412.172	615.114	69.4172	546.256	153.082	164.898	64.772	62.8705	153.228	199.975	508.778	128.595	172.952	65.3856	114.833	356.011	56.9494	99.3377	324.346	95.8121	479.387	101.667	337.692	50.7805	60.5032	213.355	0.228309	86.1717	127.133	0.677809	0.436954	390.272	460.551	0.847402	0.180572	140.615	188.852	0.744577	0.444022
P43276	H1F5	-0.0440684	-0.100513	-0.341422	0.0163379	-0.449409	475.998	443.968	254.754	681.571	429.531	605.233	113.931	405.102	165.366	163.352	70.0761	48.8435	154.468	177.738	332.652	175.205	217.081	71.5905	157.43	322.524	52.9622	69.2729	258.842	100.801	420.044	119.323	312.189	42.9588	65.4271	220.264	0.476039	118.188	146.702	0.805633	0.102295	301.228	382.557	0.787406	0.591317	161.083	184.157	0.874706	0.710224
C0HKE6	H2AC13	0.81389	0.028325	-0.242123	-0.194597								114.749	658.543	94.5279	83.7497	121.888	93.3169	119.549	47.385	277.814	81.2985	166.071	109.972	126.879	355.561	150.538	138.956	325.064	150.564	259.496	148.317	258.908	62.4798	215.933	57.1194	0.720327	137.327	119.648	1.14775	0.371819	287.262	424.533	0.676654	0.117695	137.054	74.6846	1.83511	0.306726
Q6GSS7	H2AC18	0.839226	0.0326671	-0.241073	-0.185367	-0.025101	570.051	385.444	470.57	527.488	542.619	465.097	112.615	659.743	93.6997	83.7114	122.735	95.0956	116.707	47.0336	277.708	79.7895	164.669	111.056	122.971	356.275	153.628	140.145	327.507	149.226	261.023	146.36	260.243	70.1442	217.69	57.3649	0.706065	136.698	117.681	1.1616	0.371952	288.486	425.68	0.677705	0.111925	135.865	73.7019	1.84344	0.301023
P27661	H2AX	0.839284	0.0451011	-0.257044	-0.207742								122.982	690.454	91.9858	85.7862	123.286	93.5286	117.34	42.5245	278.264	80.3582	165.781	108.021	123.606	359.49	150.468	137.795	327.92	149.246	260.301	146.741	259.032	57.3607	219.441	57.102	0.657309	140.927	118.711	1.18714	0.372104	288.406	436.748	0.660348	0.118924	135.671	72.3223	1.87592	0.305482
P0C0S6	H2AZ1	-0.066816	-0.3988	-0.058231	-0.0376003	0.00165343	576.639	500.274	419.334	485.292	470.355	513.699	91.9359	305.019	170.066	144.406	86.808	86.995	176.102	205.293	365.953	151.648	221.529	20.6435	141.575	398.276	31.966	36.5783	277.598	141.306	373.378	165.16	327.678	18.8089	58.7558	224.343	0.203858	100.78	150.38	0.670167	0.40587	323.743	358.891	0.902066	0.435004	177.634	201.913	0.879755	0.749949
Q64524	H2BC21	0.400598	0.00158738	0.0341841	0.122954								164.421	352.812	151.631	125.599	167.417	123.189	120.21	127.512	600.748	104.715	208.184	96.9765	145.249	402.168	120.088	138.474	370.23	153.059	327.098	121.024	264.125	220.089	131.318	127.19	0.88964	133.485	130.624	1.0219	0.662007	411.701	360.693	1.14142	0.129965	170.958	124.971	1.36799	0.438915
P68433	H3C1	0.0278505	-0.00980038	-0.0885965	0.249348								149.243	622.045	159.034	155.747	120.518	94.8238	158.593	114.461	394.031	126.575	127.833	37.3853	81.6898	325.16	38.7621	64.1447	372.948	187.33	267.567	178.812	192.926	148.53	113.241	161.762	0.793297	129.687	138.75	0.934681	0.54854	319.969	404.924	0.790194	0.598877	158.066	144.939	1.09057	0.403168
P84228	H3C2	0.00253795	-0.00781553	-0.0453473	0.278985								137.323	534.09	144.095	136.955	102.715	85.8589	148.174	119.671	347.174	108.119	114.631	30.9326	67.8852	280.956	32.0717	53.6219	378.995	187.076	276.506	176.859	206.719	147.145	111.998	164.986	0.826989	119.147	127.233	0.936445	0.630788	310.963	363.85	0.854644	0.871805	148.6	144.277	1.02997	0.405076
P62806	H4C1	0.453353	0.00580693	-0.0313414	0.17912	-0.00696196	542.567	477.937	427.092	573.413	441.084	487.662	105.206	435.687	134.227	100.974	114.148	107.217	123.654	113.752	397.914	70.017	156.61	116.321	97.9523	342.33	111.66	106.806	349.684	148.787	351.339	93.7253	295.824	192.535	131.342	117.463	0.819113	102.188	97.5504	1.04754	0.531501	347.807	376.452	0.923909	0.0340998	146.541	118.29	1.23883	0.335071
P06684	HC	-0.0342313	-0.00216205	0.0650216	0.00762334								106.423	145.913	173.271	99.1202	635.866	627.798	137.456	143.193	17.7139	43.4056	40.9421	2377.66	44.2613	43.0081	896.803	1438.41	226.616	183.135	205.045	160.942	272.591	270.832	141.248	180.654	0.925391	97.0256	101.441	0.956473	0.682455	172.307	131.322	1.31209	0.69345	132.449	153.768	0.86136	0.888549
P00493	HPRT	0.0513705	-0.156651	-0.000679067	-0.217706	0.0439916	512.524	529.703	478.897	472.129	448.073	513.95	177.03	184.702	180.37	163.513	116.137	115.844	178.466	151.769	226.981	160.043	205.018	65.4005	232.157	223.701	108.462	98.8364	196.78	190.155	227.544	191.139	205.615	66.3016	153.944	198.417	0.24589	163.672	195.603	0.836758	0.900922	209.792	211.982	0.989666	0.381081	191.848	176.217	1.0887	0.269914
Q8BV49	IFI209	0.132525	-9.24e-05	-0.44078	-0.134022								29.6032	746.313	33.84	25.2262	26.5926	27.6563	26.2829	19.3656	474.004	7.40345	48.863	84.6842	36.4874	555.965	93.1415	81.8678	448.168	20.2128	612.663	15.012	503.405	34.3485	39.0072	33.277	0.984309	25.338	25.5752	0.990723	0.0921947	475.192	638.314	0.74445	0.450704	34.3053	26.3085	1.30396	0.523525
P0DOV1	IFI211	0.371576	0.129645	-0.00115321	-0.445244								137.105	359.431	84.5973	75.2989	131.855	130.612	84.8372	64.5041	789.88	241.824	297.182	439.039	230.907	801.478	546.157	520.985	335.498	141.924	349.501	121.549	337.493	45.7704	183.273	145.649	0.469035	187.401	142.585	1.31431	0.944072	487.624	503.47	0.968526	0.355864	174.568	98.3299	1.77533	0.342867
P01639	IGKV9-120	1.06499	1.06626	0.293161	-0.260532								349.538	281.414	540.36	12.6204	362.866	194.656	65.542	48.8873	219.397	102.958	286.127	353.657	97.6959	226.953	441.485	593.78	438.18	64.1461	235.845	26.4801	396.228	76.6895	69.45	137.957	0.280589	173.982	45.5988	3.8155	0.260501	351.268	248.07	1.416	0.259766	296.878	84.1286	3.52886	0.387505
Q921I1	ITPR3	0.053071	-0.338241	-0.119362	-0.00542284	0.158431	523.729	613.29	471.866	537.225	412.631	405.741	140.292	210.233	166.927	183.543	687.36	648.799	157.943	160.828	106.348	160.453	163.999	700.378	179.501	129.196	689.028	750.043	121.974	178.414	110.473	235.217	130.884	654.753	164.33	165.39	0.117221	155.025	199.42	0.777378	0.429049	119.736	149.968	0.798409	0.188112	169.78	161.387	1.05201	0.674438
Q6ZPU9	KIFBP	0.257329	-0.000643614	0.0758833	-0.146147	0.251466	490.117	545.465	562.567	438.939	502.771	425.43	100.343	146.38	113.581	80.756	123.25	112.044	79.8951	88.3544	117.182	183.458	202.288	502.899	284.803	128.01	600.298	580.932	278.491	89.2916	275.574	102.715	287.69	266.055	172.895	108.833	0.959796	152.232	156.091	0.975277	0.572539	227.788	183.321	1.24256	0.339293	135.054	92.3609	1.46224	0.533488
Q9QZQ8	MACROH2A1	0.00012091	0.00729368	-0.396524	0.12207	0.000364236	565.64	468.594	453.174	608.881	380.906	481.639	137.287	430.279	119.746	107.889	103.582	110.735	128.409	105.251	363.673	76.5177	113.81	232.12	90.1141	400.369	171.171	198.868	334.581	120.439	395.225	126.435	354.133	293.451	128.286	118.938	0.802739	114.03	108.146	1.05441	0.0158048	350.796	408.624	0.85848	0.952393	117.999	117.533	1.00396	0.484648
Q8CCK0	MACROH2A2	-0.693579	-0.396299	-0.0967121	-0.00385901	-0.0057478	539.927	470.967	447.935	489.472	505.035	501.861	118.393	275.894	162.57	172.391	131.053	132.273	205.356	226.622	318.1	75.2347	155.536	220.831	92.8461	335.627	227.544	227.881	162.221	124.566	199.875	145.266	180.381	211.982	85.1252	464.984	0.195121	92.9175	136.834	0.679051	0.471755	220.234	270.465	0.814279	0.208558	147.558	298.988	0.493524	0.86175
Q3KNM2	MARCHF5	0.193089	-0.0071199	0.248964	0.167964	-0.00172978	483.727	617.126	344.13	545.361	390.126	547.829	135.193	69.1175	146.379	87.8653	238.102	150.147	152.959	125.438	108.909	173.18	220.879	204.498	219.883	142.937	275.734	222.097	207.329	433.232	137.899	262.809	168.64	434.877	224.776	268.351	0.845719	177.716	190.186	0.934434	0.295671	161.626	116.651	1.38555	0.44559	266.83	182.249	1.4641	0.413057
E9QB02	MARS1	-0.00383168	0.0498836	0.000319875	0.251302	0.267075	523.86	517.313	591.811	444.986	515.422	386.205	203.981	191.175	233.954	198.412	175.363	171.667	209.751	229.725	257.12	219.802	209.114	104.94	197.704	247.829	117.823	111.002	188.188	170.975	172.886	154.045	173.076	343.836	178.422	191.897	0.414441	200.735	183.387	1.0946	0.952791	206.128	203.963	1.01061	0.802735	204.681	210.457	0.972552	0.404948
Q62048	PEA15A	-4.77e-06	0.824366	0.00543329	-0.673621	-0.236406	396.284	523.293	386.788	500.922	521.758	570.297	322.943	86.0698	148.534	207.786	343.625	351.518	134.319	103.846	277.995	429.232	107.77	250.68	192.891	275.491	506.553	518.524	113.687	89.5838	74.8952	182.109	81.345	306.32	263.422	108.184	0.0935839	338.532	194.262	1.74266	0.897835	157.676	145.485	1.08379	0.994301	115.296	115.45	0.99867	0.079342
Q3U125	PRXL2A	-0.791715	4.94e-06	0.144802	-0.115352	-0.000635219	502.502	477.05	489.73	513.166	508.837	457.83	137.459	102.01	331.277	114.811	323.286	372.112	358.7	427.155	125.807	97.8603	167.194	516.482	103.649	108.801	664.068	606.242	124.981	191.417	101.8	154.903	104.677	497.831	138.535	355.105	0.994021	124.618	124.454	1.00132	0.165467	118.488	104.204	1.13708	0.0811343	229.963	380.32	0.604656	0.407881
F6YVP7	RPS18-PS6	-0.000472898	0.000199083	-0.00291039	-0.0993095								159.271	215.022	295.467	222.543	92.2498	95.083	251.013	344.394	164.676	238.202	326.213	237.412	170.135	166.477	231.654	196.664	200.749	217.007	198.749	157.538	201.276	66.9216	157.542	253.799	0.964077	185.005	183.405	1.00872	0.821491	188.901	193.416	0.976654	0.941248	279.562	283.069	0.987612	0.564816
P97351	RPS3A1	0.491032	0.215623	0.00504711	0.0797343	-0.0602221	497.673	506.785	384.153	551.905	440.614	548.784	182.401	224.578	238.378	173.049	121.892	113.358	199.266	204.603	157.038	279.141	256.596	61.5187	156.65	153.359	82.1343	79.4848	225.64	300.893	164.653	187.437	182.009	153.644	199.217	192.901	0.245569	220.253	172.379	1.27773	0.817266	188.229	180.863	1.04073	0.0657336	265.289	198.923	1.33362	0.535167
P42209	SEPTIN1	0.479578	0.186725	-0.557132	0.0259669								20.962	775.94	78.4499	23.5241	46.4281	28.4838	52.4054	38.6239	525.225	26.2489	40.1601	98.8247	6.8955	715.836	78.5076	113.721	231.034	70.1917	289.929	185.749	221.524	108.592	372.258	29.3774	0.637918	139.823	72.0562	1.94047	0.227205	325.928	593.902	0.54879	0.18239	62.9339	40.1356	1.56803	0.743549
Q8C650	SEPTIN10	0.407604	0.0846598	-0.0618874	0.000894559								270.317	384.434	224.082	222.237	202.829	236.345	219.85	172.52	286.02	182.658	245.702	111.995	181.39	283.005	126.839	112.132	257.031	245.626	234.655	179.319	244.683	171.784	218.21	157.952	0.383413	223.728	194.315	1.15137	0.482561	262.578	300.698	0.873229	0.0837711	238.47	183.441	1.29999	0.940999
A0A0J9YUL3	SEPTIN11	0.155083	0.12382	0.0327858	0.186804	-0.00104255	488.083	536.242	436.256	503.569	450.179	525.2	226.288	181.566	310.211	144.344	169.459	129.587	298.156	150.662	300.828	141.92	223.85	71.2192	146.395	289.29	83.803	72.2072	251.269	268.221	244.965	184.916	233.618	149.513	203.538	185.334	0.341636	190.582	158.552	1.20202	0.57026	261.905	238.607	1.09764	0.349064	267.427	211.384	1.26513	0.38465
P42208	SEPTIN2	0.080039	-0.0301001	-0.0333331	-0.0636717	0.0894341	509.24	497.461	526.603	484.942	496.803	444.958	265.061	266.728	138.79	171.2	460.938	453.078	149.635	123.321	213.224	161.544	194.826	484.092	246.725	224.583	428.085	425.435	212.033	204.949	213.536	277.291	233.577	141.891	200.179	190.472	0.629001	208.928	231.739	0.901568	0.454733	219.611	234.949	0.934719	0.427341	179.522	154.476	1.16213	0.575764
P28661	SEPTIN4	0.0308845	-0.128336	-0.00145017	-0.0226808	-0.00726913	485.412	531.796	428.958	510.765	466.668	513.666	278.381	204.635	467.672	260.633	151.079	145.951	461.726	464.056	77.3177	189.641	461.375	136.87	255.046	73.9053	202.894	206.264	162.864	419.201	159.67	250.138	184.078	220.761	168.984	315.776	0.328834	212.335	255.272	0.831798	0.930962	141.42	146.07	0.968164	0.549954	449.416	413.852	1.08593	0.660527
Q9Z2Q6	SEPTIN5	-0.000538243	-0.526223	0.298573	0.0878541	-0.00345653	474.744	526.279	454.472	497.904	473.004	511.191	172.456	42.775	325.248	207.832	236.865	269.994	321.144	352.44	51.1745	190.397	394.451	30.1405	258.003	41.1552	83.1719	88.9389	64.588	330.731	57.7836	211.934	64.5941	341.447	144.441	386.936	0.0550817	169.098	225.923	0.748476	0.138585	60.1189	47.2379	1.27268	0.914059	350.143	353.507	0.990486	0.644653
Q9R1T4	SEPTIN6	0.577693	-0.27989	-0.178139	0.251616	-0.00568637	450.436	556.715	430.952	515.263	427.295	545.712	151.016	301.3	248.839	145.718	79.4947	50.9388	174.177	120.859	296.104	139.163	211.189	75.9866	195.265	318.783	81.9606	60.9373	234.473	197.604	277.46	257.881	239.971	90.8357	147.928	176.946	0.239513	146.036	199.622	0.731562	0.155107	256.849	299.181	0.858508	0.0620611	219.211	157.327	1.39334	0.187112
E9Q1G8	SEPTIN7	0.650084	-0.00195723	0.041778	0.00145141	-0.0273196	469.101	538.808	402.305	524.242	434.483	557.487	191.911	174.288	200.712	171.368	157.191	147.184	181.576	132.079	237.533	192.518	192.313	152.359	167.561	218.67	161.197	181.773	205.098	245.256	204.01	212.867	201.571	188.686	156.414	136.311	0.855722	180.281	183.932	0.980151	0.416594	214.734	198.99	1.07912	0.0514173	212.76	149.989	1.41851	0.867937
B1AQZ0	SEPTIN8	0.197436	0.0173014	0.21344	-0.00417205	-0.00723771	474.274	550.512	413.206	527.211	434.316	531.747	224.464	165.662	245.279	145.743	141.887	138.452	239.152	124.091	317.85	185.418	240.606	109.257	168.369	290.866	135.389	107.216	301.244	203.722	269.061	244.527	299.477	118.672	191.868	177.889	0.689726	200.583	186.213	1.07717	0.235872	306.19	241.863	1.26597	0.272627	229.869	180.377	1.27438	0.80063
Q80UG5	SEPTIN9	0.0646934	0.351302	0.00638314	0.0874938	0.0603006	498.604	497.527	497.271	483.52	489.489	484.68	252.585	208.573	216.815	107.697	156.93	171.859	175.055	97.4193	353.141	130.373	160.335	101.652	113.802	316.634	114.322	120.974	225.442	139.755	238.474	162.368	224.764	248.882	179.869	170.669	0.231036	187.609	127.956	1.4662	0.817749	267.782	254.561	1.05194	0.511391	172.302	147.714	1.16645	0.530426
P14576	SRP54A	0.267825	0.491477	-0.00168451	-0.0266332	0.0559131	576.05	455.264	521.937	476.567	500.695	448.48	180.265	223.798	218.126	176.88	154.491	198.149	175.663	204.619	145.12	203.04	196.233	156.741	131.937	186.54	123.623	174.842	254.361	238.923	192.473	147.616	188.726	145.066	259.921	160.577	0.101616	214.409	152.144	1.40925	0.896165	196.069	200.937	0.975775	0.103986	217.76	180.286	1.20786	0.605281
O55201	SUPT5	0.0663494	0.0438285	-0.0453215	0.373496	0.00192906	501.529	491.044	493.706	492.083	528.302	445.25	134.509	344.231	147.452	112.14	82.9155	88.3547	137.669	127.644	377.622	121.279	127.658	107.686	87.1397	358.484	72.6683	69.5986	218.385	163.338	228.455	181.465	215.975	107.017	182.15	133.436	0.606628	145.979	126.915	1.15021	0.589706	270.661	310.39	0.872002	0.32766	146.149	132.916	1.09956	0.0965801
Q62383	SUPT6	0.00363744	0.0173192	-0.0824983	0.00912669	-0.0439576	503.311	460.599	462.788	463.178	539.373	515.839	196.637	282.368	237.363	150.275	137.17	113.417	199.202	205.094	268.378	121.384	160.941	80.7437	148.888	289.232	109.137	127.302	257.942	206.052	261.451	168.343	251.466	153.191	183.752	182.516	0.676535	167.258	155.835	1.0733	0.146871	259.262	277.683	0.933661	0.821132	201.452	195.604	1.0299	0.781111
Q5NC41	1810065E05RIK	0.303638	-0.0788264	-0.0844874	0.259959								400.791	73.7832	65.4484	793.69	73.7638	81.6683	30.2318	45.0082	18.2661	388.034	38.9825	85.4758	738.165	1.6675	57.8579	78.7631	9.96861	29.0844	12.0376	425.664	30.336	161.366	807.555	9.97096	0.539616	532.127	652.506	0.815512	0.714592	19.5236	29.1628	0.669469	0.339896	44.5051	28.4037	1.56688	0.339807
Q9CPN9	2210010C04RIK	2.13958	1.49109	1.46728	0.730338								481.903	28.2168	272.07	56.4364	63.8328	43.9113	157.201	67.5928	9.21183	449.327	561.488	8.32186	88.0237	9.71274	14.6868	14.507	997.661	338.279	31.7019	69.9228	39.5586	150.602	48.0021	94.154	0.208734	326.411	71.461	4.56768	0.421404	348.81	23.2105	15.0282	0.0725002	390.612	106.316	3.67407	0.351275
G3X8U3	2210016F16RIK	-0.00128094	0.00569166	-0.116714	-0.3821	0.107055	482.595	508.163	557.039	446.094	492.668	470.758	207.236	230.271	282.256	195.878	238.863	245.525	297.549	342.332	176.739	173.749	285.139	153.135	212.193	184.4	260.619	278.709	152.684	323.845	153.003	142.461	151.284	202.505	190.495	264.893	0.784076	190.493	183.511	1.03805	0.326216	160.235	189.225	0.8468	0.873152	297.08	301.592	0.985041	0.111304
A0A0A0MQC6	5330417C22RIK	0.0267281	0.0109327	0.172463	0.589936								259.889	17.9911	224.026	548.804	52.3575	84.2832	202.803	270.822	27.9202	844.43	361.14	115.881	492.32	32.0349	98.682	50.9371	41.5348	143.019	33.8702	284.716	36.8202	503.149	356.787	168.507	0.835594	487.035	441.946	1.10202	0.3122	35.4251	27.9654	1.26675	0.712337	242.728	214.044	1.13401	0.40945
E9PVG8	9530053A07RIK	-0.920503	-0.243197	0.189854	0.0893677								362.257	29.6803	125.698	357.264	206.383	191.776	156.163	264.113	33.735	375.253	127.696	49.6484	366.911	35.9646	59.0656	48.4917	38.5462	113.146	27.8206	931.982	37.3335	147.623	332.04	269.47	0.411609	356.517	552.052	0.645802	0.149391	36.5382	31.1551	1.17278	0.0978996	122.18	229.915	0.531413	0.620623
Q5SVP0	9930111J21RIK1	-0.00528164	-0.0272573	0.00973197	-0.155631								43.9089	295.845	151.323	31.4788	74.3088	80.2876	113.737	103.352	447.626	30.7496	111.661	171.909	50.2221	488.358	147.33	206.693	486.639	69.691	587.833	92.668	523.547	67.7794	75.8904	132.231	0.743658	50.183	58.123	0.863393	0.774031	485.937	457.346	1.06252	0.841418	110.892	116.44	0.952352	0.464981
Q5YD48	A1CF	-0.109026	0.542812	0.0188787	-0.0526189								289.4	10.9161	489.485	203.912	70.5656	88.6828	638.682	533.851	27.7679	220.845	280.852	312.563	190.943	38.9804	330.233	193.354	26.0804	504.649	13.2857	181.022	17.8587	100.654	298.399	383.178	0.0779179	269.548	191.959	1.40419	0.788151	23.9023	21.0607	1.13492	0.417099	424.996	518.57	0.819553	0.700088
Q9D2R0	AACS	-1.19595	-0.0996517	-0.294173	0.06568	-0.0931002	444.617	504.969	432.028	572.194	470.084	495.412	276.364	121.021	252.881	523.732	145.23	123.049	271.493	418.576	95.1878	260.407	107.837	762.716	199.29	92.1328	370.064	349.973	67.7962	185.635	104.823	319.427	88.7867	213.965	283.121	348.854	0.515681	273.297	347.483	0.786506	0.133843	83.9236	105.992	0.791789	0.0513014	182.118	346.308	0.525884	0.692886
Q3UHJ0	AAK1	-0.0244357	-0.099529	-0.194723	0.133231	0.00222466	474.21	489.842	518.332	462.993	483.668	516.26	165.28	320.985	185.883	292.095	211.385	188.975	216.015	257.836	297.052	282.059	259.663	100.037	249.733	308.109	74.9837	96.4064	226.075	155.714	275.747	242.897	242.929	164.245	220.21	183.717	0.374467	222.516	261.575	0.850678	0.154661	255.352	301.614	0.846619	0.646837	200.42	219.189	0.914371	0.464872
D3YZD8	AAMDC	0.142478	0.137947	-0.0239842	0.029012	-0.0832888	499.332	365.228	508.722	537.136	591.081	440.089	546.162	29.0485	227.022	156.476	1536.2	1573.79	328.088	92.9626	62.4367	168.957	243.135	336.223	351.872	76.9315	310.377	212.824	22.5569	222.646	27.6009	227.144	29.9064	694.955	301.279	75.1353	0.506303	338.799	245.164	1.38193	0.775611	38.3	44.527	0.860153	0.505983	230.935	165.395	1.39626	0.79549
J3QN89	AAMP	0.0431102	0.000120602	-0.00141077	0.00153687	-0.00445323	503.44	438.572	517.037	502.533	518.281	470.642	185.237	138.61	253.268	168.41	526.716	457.46	227.876	246.612	208.989	184.188	229.254	211.859	170.53	319.123	263.781	201.627	240.439	347.574	253.188	232.68	242.946	218.366	205.358	271.337	0.965718	191.594	190.54	1.00553	0.918352	230.791	236.974	0.973911	0.52585	276.699	248.608	1.11299	0.934581
Q8BGQ7	AARS	-0.555268	-0.00469626	-0.00677794	-0.0775247	-0.0281449	493.369	472.596	477.738	501.189	523.76	475.419	172.651	184.094	212.307	266.971	175.178	185.37	205.005	307.118	147.107	214.37	155.504	393.427	176.087	164.098	325.974	390.154	205.432	190.709	233.475	182.939	204.093	152.814	215.251	353.775	0.823656	200.757	208.666	0.962101	0.782002	185.544	193.889	0.956961	0.132504	186.173	288.633	0.645019	0.573928
Q3THG9	AARSD1	-0.109395	-0.00522946	0.0225906	0.0224306	-0.000271004	474.368	479.693	514.079	481.415	547.141	448.526	201.125	187.488	167.836	161.303	205.552	295.499	184.903	160.96	120.802	166.151	214.804	109.471	219.237	137.089	130.41	143.544	396.686	211.511	453.504	313.053	380.788	335.706	291.419	447.16	0.850722	219.565	231.198	0.949684	0.778022	299.425	259.36	1.15448	0.54622	198.05	264.341	0.749224	0.764652
Q9JKX4	AATF	-0.261501	-0.00284535	-0.00827293	-0.0190914								206.206	433.41	172.984	128.323	189.032	295.688	217.921	156.448	690.446	143.601	23.5758	164.955	43.5795	641.055	156.529	211.971	182.725	241.644	184.888	340.223	275.744	252.7	133.491	296.561	0.92461	161.099	170.709	0.94371	0.866005	382.972	419.784	0.912306	0.375396	146.068	223.643	0.65313	0.71427
P61922	ABAT	-0.497447	-1.9212	0.00630336	0.019507	-0.0219504	479.108	473.366	497.647	501.122	510.079	480.638	305.565	69.7328	137.773	555.334	187.93	183.41	172.841	222.456	58.4791	305.831	152.947	170.378	509.608	42.8131	144.939	130.545	48.6759	163.722	48.1684	522.301	61.0466	134.135	307.847	284.354	0.00364709	306.414	529.081	0.579144	0.80177	56.0672	53.5714	1.04659	0.139112	151.481	226.55	0.66864	0.643224
Q9JI39	ABCB10	-0.236454	-0.0364317	0.181799	0.204341	-0.0110249	537.218	411.916	493.195	573.681	495.816	441.902	202.257	140.146	231.832	287.407	596.966	568.87	256.778	319.409	159.57	120.341	173.148	298.792	196.829	112.132	352.36	282.616	385.988	240.846	329.445	280.56	280.649	815.74	340.408	231.869	0.66557	221.002	254.932	0.866905	0.437355	275.402	193.908	1.42028	0.185628	215.275	269.352	0.799235	0.395771
P21447	ABCB1A	-1.07609	0.821545	0.0419509	-0.114871	3.33e-06	521.159	450.175	508.057	493.823	548.554	435.901	312.799	37.5471	177.575	224.554	90.2341	122.683	314.615	356.54	53.031	266.871	197.991	75.8217	219.692	52.102	119.869	101.696	46.5303	229.544	55.5547	185.105	60.7367	124.177	350.598	512.547	0.0348974	310.089	209.784	1.47814	0.508128	53.4327	48.4013	1.10395	0.0773351	201.703	394.567	0.511201	0.341575
Q9DC29	ABCB6	0.00938923	-0.07994	0.119811	-0.566597								287.511	92.5827	124.902	356.676	314.702	424.33	124.372	164.058	200.812	450.052	211.63	595.942	606.906	179.439	677.289	981.894	162.063	187.309	110.567	334.231	115.76	271.261	337.194	204.522	0.508371	358.252	432.604	0.828129	0.42581	159.545	127.53	1.25104	0.781475	174.614	164.317	1.06266	0.202889
Q61102	ABCB7	-0.0100494	0.00881156	0.0159128	-0.0160146	0.0105386	512.483	508.137	481.583	483.182	433.969	533.448	330.878	245.765	505.154	294.575	705.857	619.565	246.445	468.23	166.05	206.28	172.132	294.434	168.084	148.164	440.102	378.7	311.151	162.622	258.025	150.995	232.604	296.99	126.43	210.865	0.835459	221.196	204.552	1.08137	0.74176	236.602	217.318	1.08874	0.847719	279.969	308.514	0.907478	0.780688
Q9CXJ4	ABCB8	-0.0625895	-0.174201	-0.0438942	-0.215792	-0.338677	441.847	449.279	443.524	517.3	502.748	561.801	159.362	88.8988	202.064	256.117	673.828	685.657	204.726	230.675	132.286	221.574	189.71	2400.79	330.893	126.391	3134.59	3092.49	42.3538	120.462	47.015	191.829	40.5542	1408.32	232.075	154.047	0.313096	204.337	259.613	0.787081	0.701956	71.7314	87.4348	0.820399	0.490913	170.745	196.483	0.869008	0.451469
O35379	ABCC1	0.56495	-0.257304	0.0015494	-0.908609	-0.0590738	606.235	434.648	316.286	564.186	368.802	657.182	213.627	102.7	164.607	239.296	199.967	252.275	127.603	95.3696	284.141	238.514	186.99	168.052	263.871	324.68	283.447	250.54	163.735	139.769	169.975	255.685	170.708	85.6736	203.196	131.201	0.0607989	218.446	252.951	0.86359	0.931639	206.195	199.118	1.03554	0.0636706	163.789	118.058	1.38736	0.0715551
B2RX12	ABCC3	-0.0181907	-0.1988	0.156325	-0.0942042								333.089	106.836	116.292	464.73	182.442	173.944	119.267	130.755	138.758	348.129	124.426	175.627	334.5	100.422	234.424	314.639	95.647	104.412	90.7361	389.531	122.889	243.18	297.224	111.509	0.19601	326.147	396.254	0.823076	0.252897	119.098	99.3313	1.199	0.53505	115.043	120.51	0.954638	0.442501
E9Q236	ABCC4	0.0964027	0.509757	-0.0543465	0.26118	0.325363	498.538	535.431	607.248	440.414	447.382	443.965	332.592	162.311	169.722	191.732	472.556	492.239	153.009	133.521	189.051	228.572	235.816	472.446	168.675	191.131	378.347	382.53	94.4541	156.49	109.565	125.433	111.335	734.172	192.042	189.685	0.156366	251.069	161.946	1.55032	0.58006	131.613	154.336	0.852772	0.395084	187.343	158.738	1.1802	0.240674
P48410	ABCD1	-0.39453	-0.000876395	0.000574966	-0.000507449								126.362	160.703	175.739	59.1386	268.731	266.871	243.611	265.905	237.082	74.2763	277.943	146.391	88.6325	199.481	231.9	190.494	179.998	164.873	270.985	134.747	223.278	264.122	75.3572	389.209	0.941873	91.9986	94.1728	0.976913	0.938483	213.453	210.39	1.01456	0.185354	206.185	299.575	0.688259	0.946198
P55096	ABCD3	-1.32843	0.359589	-0.000958486	-0.497129	0.310325	529.802	503.048	549.836	473.246	448.34	466.277	245.442	54.2741	220.147	226.651	178.281	236.276	378.384	581.981	37.2867	259.909	228.599	152.322	204.829	24.6448	305.654	177.029	36.6571	201.242	42.3699	134.411	44.7649	142.563	254.601	414.554	0.142782	253.317	188.63	1.34293	0.931324	39.5696	40.4296	0.978728	0.0590141	216.662	458.306	0.472746	0.150087
P61222	ABCE1	0.183545	0.00358424	-0.0291157	0.0494434	0.0875877	486.621	509.652	524.099	471.065	473.556	487.318	169.294	203.217	198.328	165.158	187.782	173.239	197.26	198.409	197.464	210.902	262.459	116.326	184.817	190.478	101.214	130.023	176.692	257.751	164.614	207.43	144.595	157.729	191.388	204.832	0.79634	190.528	185.802	1.02544	0.53135	172.917	186.103	0.929147	0.195457	239.513	200.167	1.19656	0.551543
Q6P542	ABCF1	0.0164495	1.22177	0.310429	0.0074708	0.0312866	569.679	485.574	491.051	446.593	403.973	575.382	207.912	221.551	219.073	141.841	95.9906	107.273	202.75	198.872	291.734	205.017	183.545	20.0941	91.5982	224.224	28.1762	26.9358	258.871	253.793	223.643	129.057	252.641	62.5897	185.753	219.202	0.0205147	199.561	120.832	1.65155	0.0659738	267.749	223.139	1.19992	0.624369	218.804	206.941	1.05732	0.882737
Q99LE6	ABCF2	0.247374	0.224352	0.157285	-0.0560577	0.0317023	499.438	477.873	536.583	481.884	505.383	455.293	220.778	211.476	295.536	185.264	232.473	216.35	262.691	254.965	267.862	185.752	266.372	686.284	165.165	244.497	513.283	789.228	295.642	334.495	216.978	197.461	223.904	297.837	311.95	230.428	0.266868	239.493	182.63	1.31136	0.202265	262.469	224.317	1.17008	0.112723	298.801	249.361	1.19826	0.668186
Q8K268	ABCF3	-0.0055039	-0.0121223	-0.000240016	-0.135892	-0.020687	485.818	420.599	528.571	484.454	530.031	495.499	168.027	181.317	156.301	142.528	228.74	137.327	173.57	183.241	239.154	206.397	254.534	263.827	229.533	252.987	341.234	344.203	198.46	244.897	220.326	188.351	212.149	130.385	152.526	335.928	0.730332	175.65	186.804	0.940291	0.949953	216.588	218.21	0.992567	0.852138	218.577	230.913	0.94658	0.458587
Q6PE15	ABHD10	-0.110032	-0.502309	-0.156164	-0.302073	-0.030625	499.473	436.027	489.888	509.706	562.43	447.991	278.832	170.881	381.184	530.793	481.288	478.68	393.31	345.127	68.649	123.43	164.362	576.56	287.087	89.1286	832.446	530.811	114.359	152.109	140.765	216.121	127.736	196.848	176.996	172.412	0.250682	193.086	344.667	0.560211	0.375455	103.581	133.591	0.775359	0.51758	232.552	303.616	0.765939	0.284859
Q99LR1	ABHD12	-0.261623	-0.447173	-0.110727	0.31001	0.543488	519.222	530.252	551.677	461.48	464.896	443.135	105.35	248.818	252.702	169.943	250.781	238.395	313.894	447.38	253.602	96.7876	240.755	250.194	121.86	258.935	211.749	195.578	137.795	319.02	152.888	157.215	139.497	356.888	129.116	301.425	0.0957211	110.418	149.673	0.737728	0.445635	176.965	220.214	0.803604	0.211133	270.826	354.233	0.76454	0.175216
E9QN99	ABHD14B	-1.02718	0.0104138	0.0635456	0.0210811	-0.000112957	525.67	420.594	530.438	479.209	584.172	421.255	424.342	79.5537	176.104	274.803	194.367	172.122	196.69	241.626	80.5398	271.196	114.68	258.713	317.327	80.6012	142.615	306.4	122.835	110.587	115.919	340.174	113.641	233.758	291.884	351.144	0.748739	329.141	310.768	1.05912	0.480268	105.672	92.0245	1.1483	0.0886107	133.79	263.153	0.508413	0.715603
Q9Z1Q2	ABHD16A	0.296003	-0.00728139	0.035875	-0.158083	-0.00132926	484.689	476.617	506.266	490.347	499.915	487.796	206.752	143.174	157.341	158.547	485.323	604.264	163.363	119.569	204.554	214.354	205.82	279.545	281.196	204.981	378.477	392.639	174.285	193.492	145.587	215.249	163.19	309.024	201.934	158.773	0.792652	207.68	218.331	0.951218	0.541372	180.676	164.58	1.0978	0.129703	185.551	147.235	1.26024	0.360717
Q7M759	ABHD17B	0.277094	0.0374492	-0.161133	-0.162393	-0.001904	494.189	450.736	519.907	486.862	516.567	480.937	306.956	310.309	86.4263	187.153	109.878	178.635	71.8901	90.4191	249.603	183.166	188.416	203.892	345.098	275.152	184.586	181.366	246.211	94.8244	261.031	159.812	246.617	116.01	306.026	84.2481	0.652728	265.383	230.687	1.1504	0.140774	247.477	282.164	0.877068	0.335559	123.222	82.1858	1.49931	0.334626
Q91ZH7	ABHD3	-0.16836	0.0927139	-0.106007	0.012755	0.0318663	516.9	402.209	634.589	456.571	504.866	456.554	248.812	77.9432	1018.58	215.292	489.792	380.914	839.528	1170.21	25.0782	129.406	321.68	86.3278	72.1346	32.5625	109.877	96.5573	48.7409	480.868	33.1597	106.829	35.3642	99.7167	129.104	526.926	0.556071	169.107	131.419	1.28678	0.539857	36.3944	47.8885	0.759983	0.444481	607.044	845.553	0.717925	0.864966
Q9DBL9	ABHD5	0.784212	0.0063259	-0.00965207	0.0188019	0.105734	608.764	376.419	653.75	464.989	453.121	446.237	411.559	118.221	432.589	241.716	587.477	639.039	151.089	137.056	82.8858	213.512	162.657	706.918	266.534	77.1595	871.115	700.535	72.3567	227.02	46.0112	302.085	68.9636	1128.45	231.485	86.5088	0.833598	285.519	270.111	1.05704	0.81173	74.7353	80.4638	0.928807	0.203462	274.088	124.885	2.19473	0.720743
Q8R2Y0	ABHD6	-1.13673	0.0613822	0.0438705	-5.25e-05	0.203838	512.483	502.806	526.445	467.338	462.718	489.181	178.988	81.5291	156.253	154.579	161.419	189.779	302.576	409.972	160.859	194.959	238.85	99.0657	219.488	130.652	109.441	123.712	101.864	261.281	106.573	131.053	100.211	160.319	201.507	456.533	0.471662	191.818	168.373	1.13924	0.583078	120.978	106.251	1.1386	0.043151	218.795	389.694	0.561454	0.983514
J3QNK8	ABI1	0.00385832	2.55842	-0.0121937	0.667047	-0.0511306	477.068	511.755	423.2	529.875	470.955	518.131	333.619	249.818	171.256	169.757	100.247	67.2957	161.994	106.072	262.015	308.931	119.953	106.812	207.809	317.616	76.4123	86.7761	283.528	85.1722	304.104	172.49	289.823	104.883	349.462	91.5369	0.00098368	330.671	183.352	1.80348	0.63184	278.455	290.513	0.958497	0.873679	125.46	119.868	1.04666	0.0296634
Q59IW6	ABI3BP	0.457245	-0.0897262	-0.018181	0.0471555								334.75	129.816	253.827	383.998	266.547	325.994	194.209	138.793	136.214	376.453	267.147	125.013	329.253	108.458	64.7263	54.5276	94.245	226.977	125.846	462.932	111.514	169.41	318.642	218.604	0.340336	343.282	392.061	0.875583	0.629769	113.991	121.373	0.939175	0.0910254	249.317	183.869	1.35595	0.721979
E9QK41	ABLIM1	-0.314856	-0.426732	-0.0408511	0.0048176	-0.127772	511.916	452.043	420.941	549.371	488.915	513.828	84.0168	62.7963	67.1647	86.353	1832.66	1636.38	71.3605	65.1294	16.2701	45.8328	18.8966	2514.85	68.593	42.3177	1513.45	1903.68	106.795	15.3417	205.743	112.076	124.501	974.421	51.0057	30.1699	0.174124	60.2851	89.0074	0.677304	0.750964	82.522	103.619	0.796399	0.363707	33.801	55.5533	0.608443	0.861937
Z4YJY0	ABRAXAS2	0.0266935	-0.245195	-1.46564	-0.0580105	0.000429341	507.069	464.599	510.091	508.139	517.899	445.443	225.831	367.883	109.743	362.999	272.291	275.186	125.175	117.958	168.898	190.113	241.821	554.823	305.298	188.959	357.099	458.183	77.5864	22.4001	301.097	129.718	114.494	36.3376	129.761	70.302	0.357112	181.902	266.005	0.683828	0.0670676	120.326	285.98	0.420751	0.785616	124.655	104.478	1.19312	0.672574
Q921H8	ACAA1A	-0.678552	0.191426	-0.0823633	-0.409654	-0.0940107	464.117	456.608	470.165	519.282	561.38	459.944	194.013	125.403	160.836	134.351	319.503	391.439	259.931	302.812	100.898	171.846	215.652	292.451	201.559	107.087	349.984	344.334	96.8293	236.693	99.7665	158.375	101.549	219.978	252.936	303.398	0.256681	206.265	164.762	1.2519	0.284384	99.7588	110.752	0.900737	0.043474	204.394	288.713	0.707947	0.0858305
Q8VCH0	ACAA1B	-0.44767	0.217436	-0.0697712	-0.335144	-0.0849298	439.094	437.542	491.111	508.711	615.753	433.76	214.72	136.343	187.817	145.146	275.441	305.121	302.733	298.03	100.549	176.312	220.811	225.236	209.067	107.027	297.945	279.771	101.683	263.159	102.842	165.332	107.5	196.077	269.208	283.83	0.235017	220.08	173.182	1.2708	0.367836	103.244	115.404	0.894631	0.0745419	223.929	294.864	0.75943	0.104378
Q8BWT1	ACAA2	-0.631727	-0.612712	-0.0510896	-0.0131745	-0.0294051	477.93	474.287	485.511	491.416	535.44	475.999	124.862	71.8596	123.324	205.181	1850.37	1721.8	139.575	169.114	57.662	127.097	103.413	1097.48	155.337	69.1695	1245.5	1322.15	68.0573	120.003	74.3807	225.228	73.2861	1033.33	143.431	194.777	0.0830568	131.797	195.249	0.67502	0.357215	66.3351	71.8033	0.923846	0.0669702	115.58	167.822	0.688704	0.754325
E9Q4Z2	ACACB	0.195504	0.0151287	-0.00350897	9.4e-05	0.000786367	435.328	506.544	533.148	490.183	490.402	479.71	378.966	112.174	321.941	333.432	1830.84	1656.65	148.631	165.02	69.161	140.948	99.4503	652.437	136.976	59.093	971.5	809.153	55.8875	145.857	42.5564	149.349	78.6888	984.048	175.182	64.3367	0.810206	231.699	206.585	1.12156	0.89056	67.9124	71.2744	0.95283	0.46363	189.083	125.996	1.50071	0.9829
Q8K370	ACAD10	-0.194179	-0.558714	0.23439	0.00267348	-0.00508941	509.613	436.612	510.57	513.969	529.049	451.729	180.156	86.4898	136.533	310.326	1385.61	1276.68	154.923	211.711	92.7927	155.484	97.443	828.275	254.391	90.6248	1098.54	874.884	143.343	97.3342	110.29	184.453	131.062	1139.16	149.161	87.6507	0.12888	161.601	249.724	0.647118	0.217217	122.399	95.8014	1.27763	0.374644	110.437	151.428	0.729302	0.872114
A0A0R4J0I6	ACAD11	-1.00103	-0.124119	-0.335668	-0.107498								269.992	111.821	207.419	265.613	642.962	705.761	284.208	277.883	21.0605	182.232	170.292	1140.89	259.261	33.1182	978.581	993.439	44.2424	181.505	46.4272	217.998	44.4216	291.58	167.916	376.206	0.333868	206.713	247.624	0.834786	0.38168	36.5748	63.7889	0.573373	0.0456347	186.405	312.766	0.59599	0.510024
D3Z7X0	ACAD12	-0.153948	-0.91902	-4.13e-05	-0.0611446								113.777	69.0782	175.877	339.361	2085.21	1800.93	143.562	244.229	35.7434	71.2441	65.5003	1351.94	129.54	44.7068	1842.87	1438.24	70.7013	148.781	62.6823	234.21	69.2285	876.683	131.612	132.109	0.159039	105.544	234.37	0.450332	0.985503	58.5578	58.8224	0.9955	0.424916	130.053	173.3	0.750449	0.5513
A0A0R4J0P1	ACAD8	-0.0114174	-0.0476532	0.030947	0.153796	-0.548343	467.306	443.926	433.282	540.686	523.947	514.397	250.176	53.9428	126.734	224.336	581.041	562.598	133.622	129.191	51.1172	215.506	124.34	690.27	260.713	52.1097	624.394	548.582	61.6464	179.963	56.318	251.808	59.2661	725.84	221.216	196.939	0.338479	228.966	245.619	0.9322	0.42539	57.3432	54.1235	1.05949	0.753856	143.679	153.25	0.937543	0.174033
Q8JZN5	ACAD9	0.0558495	-0.456931	-0.115357	-0.0849908	-0.0677062	428.896	524.587	431.078	539.618	445.71	545.549	203.604	159.527	158.498	235.981	558.308	587.68	152.358	178.998	134.59	187.527	191.963	292.523	247.737	144.458	500.076	416.169	127.91	197.31	130.502	262.996	125.36	418.973	221.372	170.63	0.0252028	204.168	248.905	0.820264	0.197533	129.287	144.829	0.892686	0.360154	182.59	167.329	1.09121	0.448599
A0A0R4J083	ACADL	-0.0253829	-1.29924	-0.267826	-0.111789	0.00263651	477.895	460.832	552.307	480.509	545.009	434.317	103.854	119.308	127.564	198.648	1913.67	1783.26	112.596	124.331	105.461	130.974	120.677	1566.4	162.678	118.128	1732.83	1814.86	64.4387	80.1585	86.3001	185.662	78.822	911.867	116.266	118.873	0.00930779	117.031	182.329	0.641866	0.197572	82.9072	107.912	0.768285	0.603185	109.467	118.6	0.92299	0.398189
P45952	ACADM	-0.0228245	-0.708624	-0.0775411	0.045118	-0.0356566	486.055	462.984	472.63	511.112	559.724	448.025	76.312	29.4353	56.7172	107.337	2086.71	1861.12	60.6237	71.7159	38.0869	64.747	53.7634	1880.7	112.579	52.5564	1902.24	2138.37	25.9246	68.9024	20.7334	137.192	18.0519	2454.32	101.036	58.733	0.054498	80.6982	119.036	0.677931	0.576313	27.3545	34.2417	0.798865	0.561559	59.7943	63.6909	0.938821	0.42624
Q07417	ACADS	-0.309957	-0.343937	4.24e-05	-0.0441037	-0.0718026	479.915	425.869	494.763	500.693	571.169	466.313	279.977	66.6544	88.9848	358.067	887.89	845.446	98.7277	123.729	46.0189	217.173	75.5735	794.971	316.449	44.7353	907.712	804.702	62.3879	115.624	75.5292	345.671	79.3295	682.466	307.716	154.046	0.0987127	268.289	340.062	0.78894	0.984607	62.5788	62.3063	1.00437	0.187457	93.3941	125.501	0.744171	0.406766
Q9DBL1	ACADSB	-0.0083777	-0.185187	0.0664132	0.128195	-0.144361	458.14	470.524	485.088	505.442	509.793	502.977	181.214	111.4	180.085	212.161	786.292	693.964	137.689	122.119	97.32	149.787	87.7983	505.433	155.936	88.2838	415.38	498.551	135.425	195.136	123.603	230.758	133.45	674.539	156.789	237.365	0.236731	162.597	199.618	0.814537	0.42719	122.065	107.762	1.13272	0.828716	154.34	165.724	0.931305	0.361724
P50544	ACADVL	-0.794774	-0.272432	-0.260248	-0.040875	-0.164594	471.796	463.204	474.027	503.828	495.659	525.305	120.942	67.0089	118.132	247.683	1399.38	1708.82	127.335	179.267	54.1554	103.226	77.2029	913.579	105.637	63.7553	1316.51	1129.86	55.9327	95.9522	66.6223	152.575	61.8089	1397.21	119.59	144.293	0.324552	114.586	168.632	0.679504	0.0495857	57.299	65.7955	0.870865	0.0548469	97.0957	150.298	0.64602	0.562207
Q8K2H4	ACAP1	0.460738	-2.5e-05	0.0124792	0.363427								49.9232	435.661	67.2357	45.3074	60.9938	43.2399	47.1131	36.1433	503.411	40.7123	92.2309	607.736	56.7554	486.608	145.706	194.467	706.534	159.09	934.237	71.597	807.243	161.553	82.3832	100.65	0.989281	57.6729	57.8866	0.996309	0.786673	672.396	618.835	1.08655	0.262232	106.186	61.3022	1.73217	0.472031
Q6ZQK5	ACAP2	0.462754	-0.325437	-0.00590957	-0.0061085								90.8949	316.527	138.143	220.569	137.799	134.364	129.318	114.946	197.034	198.767	219.582	79.3761	280.502	208.89	101.989	76.6865	295.332	198.766	297.228	255.333	294.37	79.0441	241.483	140.784	0.230119	177.048	252.135	0.702198	0.809512	262.246	274.215	0.956349	0.134601	185.497	128.349	1.44525	0.838175
Q8QZT1	ACAT1	-0.460616	-0.358199	-0.166792	0.217797	-0.142683	442.801	504.43	433.145	526.518	491.151	522.282	134.483	63.045	89.9085	170.853	1236.97	1392.55	105.052	109.223	47.0976	86.5048	56.8676	1946.83	138.908	61.2727	1154.79	1271.75	58.5448	87.5703	61.001	182.568	55.864	1664.48	145.977	109.896	0.142942	122.321	164.11	0.745364	0.144342	53.8354	61.7729	0.871506	0.103756	78.1155	108.057	0.72291	0.232985
Q8CAY6	ACAT2	0.699651	-0.0337825	0.140973	1.18023	-0.00789445	460.931	445.844	535.317	489.609	574.915	434.533	358.28	55.6374	300.705	231.36	333.582	227.963	256.449	189.721	47.785	344.1	342.332	296.17	670.172	28.0453	209.713	242.515	97.0668	265.445	95.0084	300.424	95.0201	329.301	324.366	188.259	0.710196	342.248	400.652	0.854229	0.465737	79.9573	59.5637	1.34238	0.0445983	302.827	211.477	1.43197	0.00415834
Q80X81	ACAT3	0.831098	-0.0393973	0.185894	1.24543	-0.0109139	458.952	449.368	529.73	496.737	567.144	437.562	357.231	49.5426	295.857	228.98	337.813	231.424	252.136	178.289	46.7012	344.665	346.639	309.869	686.709	25.4711	219.476	253.605	97.8943	270.551	93.9942	296.466	94.0856	347.554	316.999	176.865	0.696256	339.632	404.052	0.840565	0.423364	79.5604	56.3359	1.41225	0.0386635	304.349	202.43	1.50348	0.00317173
A0A0R4J079	ACBD3	0.240948	0.577429	-0.158412	0.00287846	0.145523	491.532	522.991	523.188	454.275	490.977	473.216	281.239	198.877	186.592	258.36	132.745	128.106	147.31	164.517	170.585	298.903	162.742	132.587	225.44	181.206	136.149	128.938	149.869	190.273	160.871	236.819	150.757	131.991	319.164	151.794	0.0156001	299.769	240.207	1.24796	0.160132	157.071	180.318	0.871076	0.0793581	179.869	154.54	1.1639	0.644268
E9QNH7	ACBD5	-0.347143	0.316562	-0.00882468	-0.0263964								255.285	118.849	226.343	193.999	129.024	117.484	294.689	268.389	174.151	344.592	143.769	721.109	196.394	194.138	568.96	656.673	85.963	220.543	74.9219	160.289	98.367	278.957	182.519	219.647	0.23726	260.799	183.561	1.42078	0.836506	119.494	129.303	0.924137	0.139757	196.885	260.909	0.754613	0.7845
P09470	ACE	-1.21301	-0.426014	0.088469	6.07e-05	-0.0122212	515.56	462.8	462.568	547.29	431.88	524.575	59.7968	57.5118	158.579	94.1643	170.98	189.181	428.846	830.746	61.8643	77.5178	336.336	394.258	91.6072	47.1141	401.746	419.14	91.1891	358.225	99.1604	136.051	95.0185	451.473	88.8236	598.994	0.145593	75.3794	107.274	0.702679	0.487708	82.6906	67.9288	1.21731	0.0832122	284.38	619.529	0.459026	0.985328
Q8R0I0	ACE2	-1.3187	-1.25973	-0.336352	0.0102449	0.0244895	596.812	478.461	462.427	460.599	517.645	463.766	41.5298	36.3374	152.023	48.3912	106.06	119.714	518.255	617.449	16.3744	26.2705	457.323	3.60601	107.344	11.8772	64.4494	55.2616	8.6119	286.201	11.6014	56.9893	8.41202	157.885	13.164	1008.07	0.124762	26.9881	70.9082	0.380606	0.398053	11.1328	19.9387	0.558351	0.0897098	298.516	714.592	0.417743	0.863108
Q9JIX8	ACIN1	-0.0118674	0.607785	-0.396215	0.00929899	-0.0473438	507.826	478.504	431.675	550.769	503.496	468.278	133.431	443.189	108.076	141.203	96.5741	84.8011	87.5835	79.635	415.754	203.774	86.4135	103.972	85.5878	422.655	72.9739	75.9363	303.44	67.0968	542.762	115.56	361.506	48.7469	179.311	110.919	0.0945483	172.172	114.117	1.50873	0.0919619	360.233	469.535	0.767212	0.734374	87.1955	92.7123	0.940495	0.79457
Q3V117	ACLY	0.358042	0.00673067	-0.0977945	0.169881	0.0516549	504.82	487.373	514.779	491.534	485.391	471.007	394.37	118.275	181.263	368.957	106.518	147.51	119.243	113.885	110.971	382.622	145.69	127.78	441.939	125.936	148.055	94.7639	100.196	128.835	105.53	308.892	105.941	342.269	385.2	110.33	0.749004	387.397	373.262	1.03787	0.203216	105.703	116.58	0.906694	0.132718	151.929	114.486	1.32705	0.499054
P28271	ACO1	-0.0819309	-0.219038	-0.0209942	0.0730681	0.0102029	509.415	501.731	479.239	493.748	474.197	493.368	180.52	106.172	239.677	217.721	150.155	154.847	320.289	326.438	117.16	181.174	272.621	160.189	262.723	110.252	133.527	138.828	81.3805	347.406	87.5686	221.128	84.1341	150.65	225.508	327.84	0.140228	195.734	233.858	0.836979	0.630746	94.2248	101.331	0.929873	0.352488	286.568	324.855	0.88214	0.21613
Q99KI0	ACO2	-0.144624	-0.0683813	-0.159155	-0.0272163	0.0149245	500.868	519.379	475.69	501.706	466.272	485.575	114.972	104.965	98.0623	173.308	1387.4	1365.46	111.244	119.061	71.7591	95.6106	67.9671	1220.23	114.512	80.5742	1461.02	1181.91	71.356	116.865	75.6703	170.684	74.4874	1160.67	179.051	111.974	0.511432	129.878	152.835	0.849793	0.248904	72.5342	87.07	0.833056	0.2978	94.2982	114.093	0.826502	0.494979
O55137	ACOT1	-0.131737	0.00310887	0.0302451	-0.626433	0.0125602	472.317	497.167	524.485	471.518	475.463	505.055	119.497	96.9858	75.0791	105.875	1432.27	1870.06	78.432	70.942	136.062	73.9691	63.7496	2052.66	96.638	164.423	2696.2	2367.2	152.457	77.1018	156.952	159.317	171.425	868.024	184.661	115.765	0.893486	126.042	120.61	1.04504	0.600862	153.315	139.453	1.0994	0.359105	71.9768	88.3798	0.814403	0.116743
A2AVR6	ACOT11	0.0209827	-0.326612	-0.040108	-0.00907297								220.915	46.1544	237.373	445.25	145.654	164.351	214.718	363.455	51.434	306.686	232.386	145.548	370.841	41.5022	167.425	114.706	7.64928	317.099	10.0362	445.706	20.023	134.966	409.005	126.048	0.173931	312.202	420.599	0.742279	0.738354	26.3688	32.5642	0.809746	0.739469	262.286	234.74	1.11735	0.732725
Q9CQR4	ACOT13	-0.0659239	-0.10147	-0.189858	-0.0219118	0.000412351	532.161	473.03	478.174	475.002	473.019	525.593	105.197	70.428	100.792	122.337	1542.93	1556.83	119.571	124.872	31.8439	57.9772	68.7177	1671.64	102.961	41.1243	1594.53	1921.28	41.2112	138.011	41.1029	116.261	42.6382	1589.17	120.614	112.841	0.41727	94.5959	113.853	0.830862	0.335214	38.5644	50.8851	0.757873	0.495849	102.507	119.095	0.860715	0.526204
Q9QYR9	ACOT2	-0.168645	0.0253145	-0.0617764	-0.697697	0.0679974	503.824	503.624	513.8	463.461	466.452	504.87	119.843	157.761	88.1825	120.01	1546.12	2071.18	85.9907	93.7262	166.454	89.3407	61.1042	1885.2	92.0302	177.7	2479.21	2218.32	98.691	55.9928	104.923	92.2702	112.726	1086.17	119.254	72.2919	0.588882	109.479	101.437	1.07929	0.52517	125.957	146.795	0.85805	0.269173	68.4265	84.0029	0.814573	0.0636795
Q32Q92	ACOT6	-0.19908	-0.00191675	-0.19033	-0.311722								91.5506	158.651	69.8025	106.188	1620.52	1770.39	80.2352	76.1194	125.401	65.0702	59.5833	2171.27	93.3685	156.887	2641.54	2168.85	109.204	47.3543	116.364	100.334	122.16	840.498	134.618	60.2638	0.900777	97.0795	99.9635	0.971149	0.204043	118.922	143.967	0.826033	0.209779	58.9134	72.2061	0.815906	0.242436
E9PYH2	ACOT7	1.13272	0.479421	-0.0931611	-5.11e-05	0.181258	510.454	499.434	531.608	470.585	484.637	464.665	296.436	174.186	169.832	199.64	176.798	206.168	132.199	110.865	99.1798	294.748	195.768	254.004	265.018	95.7424	310.301	322.136	92.6939	225.394	88.1055	227.911	97.8812	403.226	543.104	115.15	0.212043	378.096	230.857	1.6378	0.495243	96.585	119.345	0.809294	0.0270297	196.998	119.404	1.64984	0.9852
Q9R0X4	ACOT9	-0.00588499	0.00118799	-0.101556	-0.0401494	0.00885635	561.859	479.199	466.655	507.13	489.853	461.529	196.511	258.929	179.289	275.203	445.332	408.508	170.189	176.171	150.128	180.64	99.119	371.682	115.449	173.448	503.025	386.225	183.254	197.76	194.85	184.065	200.416	375.725	212.105	153.273	0.926915	196.419	191.572	1.0253	0.366073	177.933	209.076	0.851044	0.822627	158.722	166.544	0.953034	0.467964
Q9R0H0	ACOX1	-0.961097	0.000144873	0.0467227	-0.476137	-0.000167909	473.523	480.651	514.564	504.998	474.08	494.541	127.35	34.961	223.315	130.894	380.294	516.005	388.14	526.239	41.633	130.387	209.936	210.144	129.265	47.9342	407.59	449.679	55.0965	368.708	62.6012	145.11	69.6447	373.002	149.302	432.778	0.948344	135.68	135.089	1.00437	0.573421	55.458	48.4988	1.14349	0.0519585	267.32	449.052	0.595297	0.117184
Q9EPL9	ACOX3	-0.00706982	-0.0847968	-0.0712108	0.00517672	-0.11795	471.977	409.908	502.4	518.123	553.389	478.804	144.479	207.995	199.444	194.285	286.7	268.807	201.725	232.609	215.064	159.405	170.997	332.177	210.784	277.682	414.67	317.778	206.117	225.316	212.225	178.269	200.223	425.233	208.382	184.084	0.352857	170.756	194.446	0.878164	0.375702	207.135	232.634	0.890389	0.739153	198.586	206.139	0.963356	0.821075
Q9D358	ACP1	-0.015418	0.286464	0.00554886	-0.0630908								196.658	174.303	179.376	134.943	810.301	769.35	187.672	146.227	142.687	188.769	150.662	442.711	140.195	186.391	500.733	665.648	239.81	167.104	221.632	200.171	225.579	376.791	222.729	189.899	0.156446	202.719	158.436	1.2795	0.814918	202.692	194.108	1.04422	0.624302	165.714	174.599	0.949109	0.556912
Q561M1	ACP1	9.08e-06	0.388285	0.00330802	-0.455382	-0.0349726	508.071	463.754	470.178	496.5	501.059	506.955	204.565	186.689	172.408	133.411	565.624	683.555	185.927	135.992	142.058	182.614	145.182	436.843	141.44	182.054	486.388	668.591	246.329	182.341	228.631	180.498	229.925	202.477	196.246	177.271	0.0820578	194.475	151.783	1.28127	0.857912	206.104	199.124	1.03505	0.990294	166.644	166.396	1.00149	0.179048
Q05117	ACP5	0.0107996	0.00927007	1.39327	0.210112								105.93	189.073	253.801	101.758	49.9306	51.7144	247.471	150.396	506.913	175.926	167.082	117.778	192.445	319.121	73.1818	106.49	389.963	95.513	201.257	106.686	400.374	174.058	147.459	72.2244	0.80576	143.105	133.63	1.07091	0.025107	432.417	236.484	1.82853	0.832376	172.132	156.697	1.0985	0.42326
Q8BP40	ACP6	-0.811334	-0.120268	-0.219945	-0.023752	0.0484746	506.096	488.332	517.087	472.816	502.608	469.81	240.064	137.666	228.766	383.277	266.093	303.284	317.854	487.949	114.107	213.365	166.417	254.23	259.096	113.783	280.763	229.071	93.5475	271.232	118.055	258.935	105.363	244.038	294.249	327.235	0.358017	249.226	300.436	0.829548	0.120525	104.339	123.168	0.847126	0.0871779	222.138	377.679	0.588166	0.541692
Q8VCW8	ACSF2	0.00933631	0.171228	-0.118116	-0.000501852	-0.0891675	476.504	471.652	478.232	501.017	521.113	489.425	399.225	186.629	95.2995	277.761	142.777	134.298	67.8008	116.82	146.148	398.153	108.319	81.6393	404.562	149.108	96.2719	93.1307	135.291	84.93	150.046	355.82	144.041	94.4819	438.677	88.364	0.208843	412.019	346.048	1.19064	0.24116	141.827	161.928	0.875865	0.76434	96.1829	90.995	1.05701	0.947822
Q3URE1	ACSF3	-0.694392	-0.440714	-0.0380376	-0.188972	0.00319326	482.642	518.933	482.156	505.167	451.037	503.528	210.34	95.0226	199.698	258.238	408.745	482.79	222.64	297.689	74.7253	190.841	161.65	470.133	226.714	82.5791	486.483	449.31	86.6653	184.284	92.5185	232.814	91.2233	238.154	189.169	264.41	0.0273443	196.783	239.255	0.822483	0.40412	84.2046	90.0401	0.935191	0.0473745	181.877	261.58	0.695304	0.283076
D3Z041	ACSL1	0.116003	-0.118428	7.31e-05	0.0309091	0.339167	517.655	517.017	506.242	478.803	469.554	471.643	84.2053	31.1956	106.932	75.9357	1727.53	2033.83	64.3648	69.392	50.6124	67.8926	80.2839	1405.82	82.0918	57.624	1936.57	1593.37	39.1635	63.7329	29.5371	83.7504	29.3608	3216.51	54.1609	74.216	0.30434	68.753	80.5926	0.853092	0.982388	39.7122	39.4522	1.00659	0.373203	83.6496	69.3242	1.20664	0.688467
Q9CZW4	ACSL3	0.0689983	0.0612096	0.0345884	0.0448983	0.0187304	500.909	505.631	497.936	460.779	463.401	523.839	427.297	72.822	160.286	377.44	108.37	89.1816	143.89	153.265	72.5989	482.564	158.751	145.293	579.295	53.7876	141.539	108.811	60.0977	125.11	56.9626	304.933	66.328	125.455	552.042	88.2979	0.5152	487.301	420.556	1.15871	0.505075	66.3415	61.1907	1.08418	0.459799	148.049	128.485	1.15227	0.522152
Q9QUJ7	ACSL4	0.940884	0.0900411	-0.131447	-0.23759	0.0424764	485.918	505.002	515.717	469.268	501.863	473.322	126.783	642.551	106.254	94.5437	129.748	130.03	91.8298	55.1088	371.939	209.885	239.592	221.617	207.652	361.875	276.112	321.154	279.305	129.906	223.528	122.037	263.669	158.92	183.266	64.1653	0.493387	173.311	141.411	1.22559	0.490215	304.971	409.318	0.745071	0.157534	158.584	70.3679	2.25364	0.342978
Q8JZR0	ACSL5	-0.503077	-0.271353	-0.00573934	0.000492729	0.0801273	498.902	464.967	603.381	446.842	512.517	440.4	53.2559	54.1957	257.433	70.9865	131.788	153.233	485.327	735.625	67.7995	46.4704	352.645	47.7503	46.6755	61.0414	54.2877	78.572	39.0001	583.038	46.5782	62.3123	47.828	112.469	39.1606	616.153	0.188028	46.2957	59.9914	0.771704	0.817417	51.5425	53.9384	0.955581	0.155634	397.705	612.369	0.649454	0.962299
Q99NB1	ACSS1	8.01e-06	-9.44e-07	-0.114505	-0.00043399	0.0829551	493.055	493.702	554.36	458.417	507.647	452.149	165.219	83.6588	98.6663	129.108	1281.99	1350.79	124.196	109.737	79.1125	140.749	119.998	944.669	182.703	100.18	1303.02	1014.73	54.9974	121.293	48.4717	159.708	51.8677	1400.67	165.325	105.624	0.996852	157.098	157.173	0.999522	0.439745	61.9925	77.4367	0.800557	0.989217	113.319	113.186	1.00118	0.94052
A2AQN4	ACSS2	0.470764	0.039668	-0.00134717	-0.00212855	0.0423052	482.009	527.181	498.932	474.96	494.305	471.463	434.023	66.4446	165.38	331.675	193.581	235.278	140.002	125.68	85.4436	394.206	217.334	287.984	511.847	84.9453	208.261	173.587	52.2879	127.694	52.6615	323.118	61.5645	114.723	471.169	72.215	0.555741	433.132	388.88	1.11379	0.912854	66.432	68.0172	0.976694	0.161767	170.136	112.632	1.51054	0.905837
P68134	ACTA1	-0.600732	-0.00400985	-0.0377733	0.343894								243.908	204.244	148.886	284.671	425.589	355.882	158.03	213.875	163.965	179.576	140.112	654.184	140.2	133.338	478.426	468.928	147.024	118.021	171.423	209.337	151.592	761.205	184.103	252.328	0.861358	202.529	211.403	0.958025	0.532391	154.193	169.668	0.908794	0.106254	135.673	208.077	0.652031	0.204158
P62737	ACTA2	-0.555295	-0.00704234	-0.0516087	0.22959	-0.104491	467.163	531.037	357.061	557.064	475.77	529.903	256.424	190.058	153.259	281.979	441.129	377.931	160.839	207.495	142.389	173.194	142.561	683.572	148.06	117.468	550.58	530.64	130.859	122.048	153.999	218.263	136.682	827.462	183.689	239.302	0.816646	204.436	216.101	0.94602	0.499174	136.643	153.842	0.888207	0.0937505	139.29	202.545	0.687696	0.283978
P60710	ACTB	-0.504321	-0.0289434	-0.0166984	0.507935	-0.0685769	473.709	528.33	383.455	539.82	477.951	521.617	206.57	244	146.477	267.246	360.37	307.602	151.908	223.343	252.113	152.442	149.496	439.509	129.803	204.766	308.158	296.131	180.486	123.404	205.882	192.555	182.197	678.04	167.855	261.92	0.663248	175.622	196.535	0.893594	0.65421	204.932	218.216	0.939124	0.145964	139.792	212.39	0.658187	0.186584
Q8BFZ3	ACTBL2	-0.460676	0.0235126	-0.0446492	0.518319	-0.0164388	484.196	538.255	400.586	526.682	427.26	554.228	253.88	215.618	111.213	268.46	501.461	458.359	117.858	198.028	180.129	157.242	145.703	597.788	135.484	141.954	419.059	374.467	142.784	101.083	151.106	167.927	129.799	1074.43	223.152	260.444	0.696048	211.425	190.623	1.10912	0.542603	150.904	169.559	0.889978	0.21349	119.333	192.11	0.621171	0.223294
A0A0U1RQ96	ACTG2	0.00576088	0.312814	-0.111874	0.298141								334.578	182.383	120.086	174.889	622.591	552.986	126.869	107.744	95.3753	167.739	128.944	857.325	157.244	97.1035	712.515	675.741	101.251	122.117	71.2283	227.941	72.8074	1432.84	300.041	127.326	0.249368	267.453	186.692	1.43259	0.508019	89.8111	116.905	0.768241	0.693512	123.716	120.646	1.02544	0.309536
Q9Z2N8	ACTL6A	0.0339675	-0.0829596	0.0876532	0.231463	-0.00117916	490.177	462.193	512.755	525.844	501.167	454.392	116.425	236.204	173.369	138.196	211.635	191.969	164.924	169.758	661.319	151.834	257.342	131.059	176.304	497.711	86.5883	99.4096	380.754	191.583	430.334	194.703	387.846	177.48	173.523	228.529	0.393667	147.261	169.734	0.867597	0.506299	476.639	388.083	1.22819	0.58075	207.431	187.737	1.10491	0.314501
Q7TPR4	ACTN1	0.167835	-0.0385078	0.0150956	-0.0854209	0.0341151	479.332	559.753	478.844	462.945	459.593	506.608	207.05	191.278	163.617	176.299	271.407	285.793	160.768	145.298	200.854	203.038	231.071	298.786	234.994	175.636	297.592	322.415	171.869	204.436	163.882	248.126	180.47	264.263	194.238	191.413	0.494375	201.442	219.806	0.916454	0.558246	184.398	176.932	1.04219	0.236737	199.708	165.826	1.20432	0.18979
A1BN54	ACTN1	0.169348	-0.0358254	0.0181439	-0.0845696	0.0338037	479.352	559.911	478.588	463.028	459.035	507.123	207.707	189.736	164.03	175.136	269.398	283.79	160.975	145.172	195.507	202.391	230.724	298.975	234.711	171.525	298.626	322.612	171.869	204.436	163.882	248.126	180.47	264.263	194.238	191.413	0.510467	201.445	219.324	0.918482	0.504486	182.615	175.048	1.04323	0.233583	199.73	165.853	1.20426	0.198097
Q9JI91	ACTN2	-0.00451741	-0.00120734	-0.129255	0.0318885	0.0209644	470.701	555.79	482.291	456.909	458.781	519.77	119.089	88.3708	104.778	110.236	1395.86	1332.95	93.4826	91.9083	59.4161	75.0897	63.2883	1570.56	69.4733	73.4508	1711.44	1595.43	55.1315	72.6915	45.348	106.024	51.64	2132.08	85.3246	65.4858	0.916288	93.1678	95.2442	0.9782	0.392228	55.3959	69.0566	0.802181	0.839355	80.2525	83.6256	0.959665	0.58282
O88990	ACTN3	0.00320106	0.00334235	-0.000962606	-0.00237738								159.946	108.383	183.502	176.625	778.277	779.61	156.245	149.402	100.44	142.13	132.873	768.144	112.818	102.673	1034.21	876.26	97.9684	136.189	102.558	153.983	112.235	1074.78	154.785	134.548	0.836338	152.287	147.809	1.0303	0.850987	103.548	104.538	0.990524	0.831631	150.855	146.732	1.0281	0.863912
A0A1L1SV25	ACTN4	-0.000296063	-9.45e-05	0.100688	0.0180296	0.0523084	487.237	554.031	483.188	471.3	471.454	483.032	197.584	141.276	179.054	182.444	274.244	283.61	188.272	190.465	161.248	199.265	203.276	263.838	231.704	146.619	261.042	267.942	151.63	203.535	155.321	207.327	164.31	309.437	222.159	210.523	0.962769	206.336	207.158	0.996031	0.113496	159.063	147.739	1.07665	0.921475	195.288	196.42	0.994239	0.504696
P57780	ACTN4	-8.96e-05	-7.91e-05	0.103067	0.0176342	0.0565432	487.562	553.208	485.168	470.776	473.669	480.301	196.262	140.689	178.057	180.972	270.625	280.169	186.848	189.424	161.248	199.265	203.276	263.838	231.704	146.619	261.042	267.942	151.692	203.824	155.302	207.668	164.397	309.331	222.524	210.82	0.966501	206.017	206.781	0.996303	0.113297	159.112	147.536	1.07846	0.957621	195.052	195.697	0.996704	0.511002
E9Q2W9	ACTN4	0.0123208	0.201009	0.0695624	-0.00466151	0.0925288	494.304	564.679	486.361	463.669	449.51	495.352	212.888	131.779	174.757	167.341	376.061	394.834	170.861	162.912	147.543	223.291	193.263	349.931	214.942	147.507	348.599	369.127	164.429	197.672	163.279	189.12	173.09	365.507	232.308	207.688	0.129453	222.829	190.468	1.1699	0.297953	161.687	147.521	1.09603	0.638154	188.564	180.487	1.04475	0.677532
Q9QZB7	ACTR10	1.05751	-0.018442	0.0141697	0.00909635	-0.0556133	496.19	468.165	463.585	489.238	487.981	536.194	259.607	145.748	209.431	201.45	188.886	203	173.608	167.121	101.688	174.774	232.365	882.972	343.165	95.0071	731.403	638.112	150.31	241.685	132.056	262.876	146.601	653.588	306.145	144.68	0.711768	246.842	269.164	0.917072	0.713104	132.866	124.27	1.06917	0.00721093	227.827	161.803	1.40805	0.855193
P61164	ACTR1A	-0.498024	0.148319	-0.167317	-0.00964613	0.0324673	514.857	502.668	486.262	466.638	492.424	493.165	206.311	322.645	154.675	182.013	182.225	182.994	174.347	198.823	169.241	219.879	138.027	325.752	199.344	160.878	319.866	329.385	154.682	164.697	170.916	197.574	164.555	270.958	206.282	211.813	0.0688214	210.824	192.977	1.09248	0.401309	162.826	218.146	0.746408	0.0395259	152.466	194.994	0.781902	0.792496
Q8R5C5	ACTR1B	-0.378197	-0.143441	-0.00462322	0.00296642	0.00621985	524.592	478.625	490.14	475.649	506.727	482.174	187.648	315.647	133.631	211.445	137.402	172.739	148.974	222.456	162.241	215.225	143.582	341.652	216.437	156.876	355.982	344.932	297.098	193.06	352.865	306.549	324.259	436.221	204.039	423.774	0.301067	202.304	244.811	0.826369	0.867606	261.2	275.13	0.94937	0.316915	156.758	265.068	0.591388	0.903279
P61161	ACTR2	0.00298981	-0.377245	-0.0226907	0.181744	0.117745	518.584	511.813	500.539	492.262	480.382	456.246	144.374	268.557	166.152	146.508	97.771	88.8472	174.666	154.929	239.409	138.159	180.442	102.109	175.037	239.728	111.769	111.584	249.411	190.786	301.02	179.028	276.228	251.885	118.667	196.356	0.0658212	133.733	166.858	0.801483	0.525198	255.016	269.768	0.945316	0.800929	179.127	175.317	1.02173	0.456122
Q99JY9	ACTR3	0.0592285	-0.262473	-0.00857715	-0.111083	-0.0582992	482.444	500.105	439.614	496.655	498.009	519.101	164.463	261.236	168.754	169.839	103.946	101.647	167.587	180.935	252.279	156.42	200.942	199.485	198.965	247.395	207.81	199.702	251.461	186.677	292.156	172.185	273.312	95.3946	131.29	167.366	0.0967197	150.724	180.33	0.835826	0.634448	259.018	266.929	0.970361	0.286157	185.458	171.962	1.07848	0.483888
A0A087WS98	ACTR3	0.260594	-0.173821	-0.00464621	-1.51357								161.506	308.282	162.071	155.118	89.2367	116.66	154.885	177.486	317.848	130.53	236.715	91.027	210.714	294.125	123.935	119.674	249.06	239.821	238.537	150.791	247.555	84.3288	131.292	162.788	0.248344	141.11	172.208	0.819416	0.793131	271.488	280.314	0.968511	0.194984	212.869	165.053	1.2897	0.000399052
Q641P0	ACTR3B	0.18965	-0.122917	-0.0263472	0.726849	0.0092219	516.118	512.651	470.477	456.87	469.946	528.286	146.772	226.256	125.005	175.037	742.168	472.606	142.384	151.577	428.191	282.381	372.542	122.168	456.475	534.77	194.918	160.278	182.829	134.441	159.553	177.168	173.846	1459.55	161.977	126.442	0.534704	197.044	269.56	0.730983	0.768237	261.622	306.86	0.852578	0.475922	210.663	140.134	1.50329	0.325023
A0A0A0MQ89	ACTR5	0.0613571	1.36e-05	-0.0982228	-0.0414177	-0.0376912	471.097	548.475	362.367	610.573	395.9	530.172	147.728	283.234	163.035	131.773	130.704	79.5438	167.434	149.639	326.335	579.971	702.433	391.18	491.898	485.954	313.732	281.191	301.764	81.9856	666.905	200.737	515.514	14.3412	100.398	383.206	0.995134	276.032	274.803	1.00447	0.502393	381.204	478.698	0.796335	0.723292	315.818	233.426	1.35297	0.749611
Q8R2S9	ACTR8	0.153749	-0.12602	-0.000861875	0.556907								127.672	224.695	149.236	117.155	240.422	212.501	141.661	147.406	350.102	153.293	201.45	261.88	242.253	342.001	173.962	205.698	214.937	195.097	227.288	213.973	213.133	322.227	175.081	172.597	0.415422	152.015	191.127	0.795361	0.933898	259.391	264.661	0.980087	0.230851	181.928	153.888	1.18221	0.0682172
A0A0R4J050	ACY1	0.0515358	-0.0230229	-0.0746337	0.046722	-0.0103827	493.212	477.578	483.072	503.221	521.502	466.734	186.002	82.4231	256.211	221.59	270.35	348.315	361.4	413.578	92.7064	206.846	537.45	352.617	280.928	108.008	286.504	331.993	58.2322	465.667	54.9055	152.016	53.0045	471.594	205.204	311.286	0.665535	199.35	218.178	0.913706	0.524864	67.981	81.7787	0.83128	0.57328	419.776	362.088	1.15932	0.548339
E9QJT5	ACYP1	0.0481665	1.08626	-0.488503	-0.000468252	-0.0068075	516.57	453.464	488.424	507.234	512.887	473.124	304.617	353.929	106.908	123.477	777.28	761.547	67.3109	50.5773	205.363	155.572	10.2507	794.404	29.6335	267.93	608.677	747.016	190.292	116.227	214.257	177.896	164.25	520.492	255.92	70.1046	0.105757	238.703	110.335	2.16343	0.143087	186.635	278.705	0.66965	0.700874	77.7953	62.6643	1.24146	0.939174
P03958	ADA	-0.0578828	-0.116877	0.0457399	0.00482214								120.357	253.163	137.416	135.628	220.623	178.377	183.322	253.802	330.549	110.281	246.402	100.324	146.234	234.163	125.342	151.762	232.269	246.418	251.75	124.2	253.629	157.418	132.484	292.434	0.188429	121.041	135.354	0.894254	0.480351	272.149	246.359	1.10469	0.531916	210.079	243.186	0.86386	0.854701
O35598	ADAM10	-0.00342706	-0.361899	0.00169759	0.11523	-0.00250278	439.148	527.515	486.836	498.941	497.862	480.875	173.657	160.389	245.909	217.73	156.578	149.151	296.919	281.745	198.902	194.998	304.984	88.1108	268.301	168.236	49.9727	35.8781	127.573	248.495	159.41	214.995	172.151	75.8124	183.095	241.026	0.0896163	183.917	233.675	0.787062	0.881434	166.209	162.678	1.0217	0.804049	266.463	273.23	0.975232	0.552829
Q9D0L4	ADCK1	-0.0608564	-0.328465	-0.41519	-0.0509951	-0.00607704	499.929	461.967	498.922	505.729	499.403	482.056	137.597	171.723	143.19	243.383	1804.26	1497.3	193.507	178.821	116.797	101.739	181.069	1900.52	191.343	147.252	2122.83	2053.67	79.1067	95.7836	92.7253	134.553	81.3761	1370.78	163.881	117.426	0.218713	134.406	189.76	0.708294	0.187035	92.4264	137.234	0.673498	0.531232	140.014	163.251	0.857658	0.481681
F8VQ52	ADCY6	-0.0263417	0.0297225	-0.0664896	-0.693482	0.0111354	479.872	498.308	518.177	524.038	448.785	476.74	296.26	100.963	138.212	233.019	337.334	371.055	165.566	119.813	68.9475	278.772	120.732	327.235	333.928	68.0624	523.758	418.616	56.4125	85.2884	37.4359	192.402	44.2393	142.977	260.809	95.6103	0.610015	278.613	253.116	1.10073	0.582999	56.5331	68.8204	0.821458	0.660733	114.744	126.996	0.903525	0.102741
Q9QYC0	ADD1	-0.00433697	0.0124924	-0.326372	-0.109379	-0.0375257	468.834	479.745	481.463	489.921	476.9	538.552	233.352	264.786	192.743	182.876	362.821	387.383	215.244	180.725	203.45	151.59	119.85	275.776	176.171	221.184	288.66	365.306	136.522	181.035	165.515	193.404	136.75	251.872	199.381	119.334	0.70084	194.774	184.15	1.05769	0.188657	158.907	217.162	0.731745	0.851227	164.543	171.768	0.957937	0.327815
Q9QYB8	ADD2	-0.340156	-0.222457	-0.0137847	-0.11021	-0.0165923	478.434	503.563	458.062	493.569	464.43	538.898	272.461	579.608	315.946	475.314	960.483	787.442	263.839	392.053	150.923	58.1143	45.3706	616.845	80.0793	89.1951	592.389	862.912	337.335	89.7145	202.825	155.015	278.753	110.385	80.54	131.103	0.522504	137.038	236.803	0.578702	0.841923	255.67	290.543	0.879975	0.377103	150.344	262.332	0.573105	0.538669
E9QJS7	ADGRE5	0.208951	-0.0271513	-0.101111	0.573428	-0.00189311	364.101	627.182	444.456	383.056	641.905	453.697	141.21	490.146	134.703	82.9334	225.995	129.372	132.342	109.113	361.666	27.7895	181.823	229.175	167.086	351.416	187.482	138.951	325.968	114.187	339.611	77.7117	321.784	181.61	112.875	94.9652	0.750142	93.9582	109.244	0.860078	0.358084	336.472	393.725	0.854588	0.259309	143.571	112.14	1.28028	0.0647511
P00329	ADH1	-0.46956	-0.319675	0.507576	0.258705								495.749	11.0041	23.714	697.357	58.4789	58.4697	56.2102	66.1729	11.2502	554.116	44.4034	157.445	637.808	5.96287	72.2729	67.9693	8.85581	34.4813	5.36802	554.343	15.0508	84.8185	485.451	35.4587	0.0856146	511.772	629.836	0.812548	0.16768	11.7189	7.445	1.57407	0.175563	34.1996	52.6139	0.65001	0.369211
P28474	ADH5	-0.0153712	-0.298375	0.00819578	-0.0206583	-0.112903	456.635	474.581	470.671	536.772	511.792	478.443	270.785	98.3011	196.389	298.144	317.637	321.294	197.351	158.841	140.594	232.372	174.014	314.018	401.687	140.267	273.912	237.861	152.352	131.704	191.557	286.577	161.913	119.734	254.585	177.152	0.164359	252.581	328.803	0.768182	0.791396	151.619	143.375	1.0575	0.665986	167.369	177.781	0.941432	0.7265
E9Q5Z6	ADH6A	0.000101472	-1.74878	6.03e-05	0.0507374								26.1361	29.5321	274.443	47.0001	527.769	421.933	556.464	729.859	14.5772	14.2146	683.115	35.8953	105.301	7.50195	46.3388	35.0211	26.9187	725.078	40.3929	67.8485	36.5203	124.183	28.8292	382.537	0.0897142	23.06	73.3831	0.314241	0.987393	26.0054	25.809	1.00761	0.980492	560.879	556.287	1.00825	0.771654
Q8R0N6	ADHFE1	0.236673	-0.0104555	0.0803146	-0.0129634	0.00636319	476.62	474.142	551.207	538.227	521.215	388.352	122.068	23.273	153.509	85.772	2531.43	3540.53	76.469	57.6535	30.9352	26.2596	50.3974	2994.61	58.7943	39.1796	2988.91	2730.76	37.3572	123.099	21.0606	134.448	30.6812	3278.9	105.964	88.4859	0.835389	84.7639	93.0048	0.911393	0.470149	32.9912	27.8378	1.18512	0.374466	109.002	74.2028	1.46897	0.663375
Q60994	ADIPOQ	-0.0606331	-0.275318	0.00320165	-0.388588								275.307	87.5608	218.346	562.31	728.088	857.118	156.326	145.084	67.8232	260.038	91.4939	431.868	206.586	60.4185	652.068	604.879	50.5214	80.38	54.2675	216.562	91.8133	212.32	66.9837	170.731	0.409601	200.776	328.486	0.611217	0.875313	70.0526	67.4156	1.03912	0.601813	130.073	157.38	0.826489	0.238074
P55264	ADK	-0.414194	-0.619275	-0.106637	-0.314459	0.0264258	525.497	489.778	496.765	451.406	483.919	512.894	163.764	174.119	176.447	497.135	179.255	175.266	218.23	322.951	91.1857	284.496	217.225	258.233	349.469	104.738	288.173	315.65	123.2	149.747	119.863	257.861	116.136	95.0207	205.817	225.533	0.151584	218.026	368.155	0.592212	0.403618	110.174	132.907	0.828956	0.146548	181.14	255.571	0.708764	0.267423
Q9Z103	ADNP	0.0140555	0.367492	-0.0979147	0.42433	-0.00403921	496.187	454.335	510.99	504.617	495.667	486	281.641	229.438	213.913	147.161	133.372	147.335	190.711	163.56	272.187	158.734	152.066	136.958	147.243	290.022	102.038	81.056	150.671	167.711	194.74	185.683	168.487	281.287	245.273	149.402	0.192875	228.549	160.029	1.42817	0.436974	197.115	238.067	0.827981	0.678731	177.897	167.891	1.0596	0.266724
P54923	ADPRH	0.0237623	0.0630835	-0.216233	0.061849	-0.0283567	497.317	458.969	481.708	510.203	531.491	465.103	194.737	312.137	146.22	155.102	241.52	237.65	147.466	131.218	277.623	136.854	190.069	122.893	170.718	297.448	133.658	112.426	240.788	135.198	270.418	165.431	246.941	214.991	231.37	159.543	0.477628	187.654	163.75	1.14598	0.0843852	255.117	293.334	0.869716	0.59546	157.162	146.076	1.0759	0.578689
A0A0N4SVK8	ADPRHL1	-0.0510104	0.00347615	-0.3174	0.192281								111.826	119.515	96.8482	82.3936	2093	1836.76	121.801	112.129	35.8743	60.2639	85.248	2245.44	64.6533	37.2995	2094.33	2010.98	31.6257	26.2877	24.8745	46.5213	29.8758	3012.72	31.9884	24.4807	0.900385	68.026	64.5227	1.0543	0.443883	32.4586	60.5629	0.535949	0.684973	69.4613	86.1368	0.806406	0.23642
Q8CG72	ADPRHL2	0.00306862	-0.0743608	-0.00363654	-0.0269175	-0.0480658	430.299	585.673	346.707	568.14	401.998	573.446	134.319	274.495	92.9089	141.573	463.798	750.934	122.024	111.658	227.214	142.777	138.961	90.9909	310.323	301.556	100.296	79.8023	319.885	171.447	365.261	131.112	363.06	193.649	190.815	155.66	0.582952	155.97	194.336	0.80258	0.8416	303.386	313.771	0.966904	0.870332	134.439	129.781	1.03589	0.82136
P54822	ADSL	-0.204561	0.000634298	-0.0284202	-0.0249353	-0.0126393	458.866	461.036	523.867	488.907	529.575	476.423	153.196	280.595	128.26	154.588	399.307	455.825	134.402	146.782	134.648	168.106	120.582	811.823	202.695	126.073	732.656	842.195	189.801	133.553	174.581	175.4	190.484	609.675	218.522	146.277	0.926809	179.941	177.561	1.01341	0.687682	171.644	193.75	0.885907	0.0533732	127.465	142.487	0.89457	0.694326
P46664	ADSS	-0.0133021	0.138452	0.0572978	-0.158716	-0.0770007	485.284	446.465	476.634	520.442	545.252	464.486	238.1	150.9	211.596	188.735	135.989	144.439	250.291	265.779	141.63	151.177	190.375	373.113	174.865	152.846	360.2	423.959	217.404	335.752	192.616	201.204	202.251	150.568	339.977	274.586	0.421168	243.085	188.268	1.29116	0.475237	187.095	165.454	1.1308	0.736109	245.908	263.552	0.933051	0.476718
P28650	ADSSL1	0.898868	-0.0777741	-0.00102333	-0.0383422	0.0104966	518.584	472.452	506.473	480.81	506.875	472.563	82.3679	308.847	94.7976	82.139	1291.21	1585.8	46.5292	42.0142	174.03	81.3052	115.516	598.623	125.751	196.26	719.108	736.281	333.742	63.9445	342.626	159.16	321.019	687.663	140.309	60.7341	0.517676	101.327	122.35	0.828175	0.930275	276.264	282.578	0.977656	0.0945569	91.4194	49.7592	1.83724	0.690796
E9Q852	AFDN	-0.560021	0.202385	0.150543	-0.145267								306.476	70.6656	196.478	266.319	234.728	228.28	242.647	236.928	80.911	272.6	179.441	220.429	275.596	68.3071	241.241	252.385	100.487	168.535	96.2897	241.613	98.609	147.769	325.027	209.654	0.104698	301.367	261.176	1.15389	0.251591	93.3358	78.4208	1.19019	0.0225795	181.485	229.743	0.789947	0.276001
Q3V384	AFG1L	-0.0246675	-0.981137	-0.291698	0.00781957	-0.00528586	523.15	426.388	508.513	512.321	504.915	478.958	178.84	104.43	137.565	334.415	802.566	945.795	130.581	195.609	64.4954	166.993	130.263	419.57	291.812	76.0936	458.09	439.108	64.019	184.659	77.9808	338.176	71.8559	755.788	259.052	166.236	0.0348412	201.628	321.468	0.627211	0.160808	66.7901	86.1682	0.775114	0.627851	150.829	164.142	0.918894	0.838087
Q8JZQ2	AFG3L2	-0.150034	-0.446398	-0.0314124	-0.0426976	-0.00252717	489.722	512.303	455.871	503.525	449.035	530.41	249.141	109.001	137.976	348.179	686.751	630.412	165.3	200.924	113.358	214.746	193.826	541.067	281.45	120.143	606.002	545.671	101.194	172.102	128.146	270.298	121.699	354.166	217.088	242.021	0.0776465	226.992	299.975	0.756701	0.437756	112.084	119.097	0.941116	0.280153	167.968	202.748	0.828456	0.564305
Q3UHD9	AGAP2	-0.0300268	-0.155058	0.0358356	0.116906	0.0160953	506.262	472.281	520.961	477.336	487.462	490.915	137.349	229.541	137.48	186.531	587.675	673.109	180.693	161.84	312.374	73.1412	111.725	270.805	120.112	449.751	334.343	242.541	711.044	217.567	768.784	161.682	676.372	817.263	157.485	176.941	0.358348	122.658	156.108	0.785726	0.699864	566.597	482.692	1.17383	0.638912	155.591	173.158	0.898548	0.529113
Q9ESW4	AGK	-0.00256008	-0.0481769	-0.0208898	0.0545975	0.00143026	462.552	518.568	496.212	485.372	487.014	490.387	152.285	261.607	193.988	233.603	242.284	230.432	183.387	198.641	247.049	158.979	187.462	168.963	126.378	221.977	172.089	136.134	199.986	182.031	214.856	201.63	212.639	202.512	181.997	188.251	0.552934	164.42	187.204	0.878296	0.55774	219.891	232.813	0.944496	0.711268	187.827	190.093	0.988079	0.512941
F8VPN4	AGL	0.000771827	-0.0353252	-0.00128775	-0.719008	0.138744	507.312	495.37	539.491	460.773	475.071	483.028	215.375	85.8936	153.927	196.606	1027.25	1168.56	153.97	118.441	78.1475	170.459	101.601	824.776	203.448	77.3098	1320.89	1143.4	72.9932	133.289	63.3727	282.498	71.908	827.116	233.016	110.307	0.562457	206.283	227.518	0.90667	0.877228	74.3496	75.5254	0.984432	0.925044	129.606	127.573	1.01594	0.0230877
Q8CJG1	AGO1	0.0110648	-0.189349	-0.126619	0.0396526	0.0177459	486.824	500.782	518.091	456.142	457.368	531.022	161.973	334.956	175.69	268.068	115.77	104.687	170.176	188.962	253.157	208.048	180.235	93.3063	209.298	267.297	100.917	90.3389	252.1	178.424	289.388	180.724	279.026	108.892	160.772	157.735	0.245167	176.931	219.363	0.806566	0.206965	261.428	297.214	0.879595	0.587978	178.116	172.291	1.03381	0.414121
Q8CJG0	AGO2	-0.000860075	-0.0266818	-0.0431385	0.0112826	0.0376642	487.183	503.732	527.489	446.147	466.885	521.296	122.71	275.288	160.091	192.88	188.719	185.86	145.744	205.111	242.841	186.434	185.369	111.335	193.182	235.123	163.953	182.891	214.851	187.978	208.475	185.545	202.281	275.549	214.436	190.162	0.615555	174.527	190.536	0.915979	0.446991	219.991	239.629	0.918048	0.907278	177.813	180.339	0.985992	0.792552
Q8CJF9	AGO3	0.0495337	-0.3137	-0.192895	-0.0675422								154.993	336.246	184.672	279.027	116.576	116.239	180.411	204.485	252.926	203.463	199.514	100.21	214.09	265.24	132.543	129.15	239.687	211.882	297.697	207.662	272.532	127.682	185.902	168.4	0.137767	181.453	233.593	0.776789	0.148491	255.048	299.728	0.850934	0.345843	198.689	184.432	1.0773	0.312628
Q8K3K7	AGPAT2	-1.10835	0.0651853	0.0163437	0.023563								142.097	34.4531	276.697	119.584	186.855	224.462	313.58	413.773	52.5314	161.275	173.898	358.402	162.728	56.9983	351.177	221.384	46.7621	219.191	48.2758	179.964	50.0873	339.049	233.874	366.517	0.50046	179.082	154.092	1.16218	0.676751	49.7936	46.5757	1.06909	0.0271515	223.262	364.623	0.612309	0.696361
Q9D517	AGPAT3	-0.0498972	-0.20112	-3.99e-05	-0.0151823	0.000770243	457.756	541.332	477.072	487.352	433.744	538.597	128.843	260.908	259.7	238.219	294.896	282.974	195.35	327.421	232.459	125.972	223.517	470.199	133.127	208.122	692.025	597.128	236.359	279.954	260.96	295.646	259.258	660.986	230.256	346.494	0.364988	161.691	222.331	0.727253	0.976048	242.692	243.33	0.99738	0.542365	254.39	289.755	0.87795	0.779949
Q8K4X7	AGPAT4	0.577744	0.0082822	0.0681233	0.263182	-0.103917	399.661	542.165	405.718	526.845	449.191	579.341	295.976	73.4	174.834	234.064	120.679	89.3014	149.747	134.281	129.93	428.732	276.727	65.6702	472.827	126.77	97.0474	64.4935	103.725	236.952	106.659	266.479	118.181	194.587	313.808	171.723	0.815427	346.172	324.457	1.06693	0.451875	117.279	102.276	1.14669	0.107002	229.504	151.917	1.51072	0.365915
Q9D1E8	AGPAT5	0.0465799	-0.0559968	0.00165989	-0.139411	2.12e-05	537.289	446.06	497.964	507.115	516.982	454.659	260.039	101.762	141.517	266.17	135.055	147.963	142.614	121.167	142.992	303.373	204.407	228.9	364.78	157.933	265.405	190.504	127	271.199	149.783	249.051	148.445	102.718	213.751	262.327	0.487156	259.055	293.334	0.88314	0.884794	139.479	136.493	1.02188	0.627557	205.708	175.369	1.173	0.421765
A2AL50	AGPS	0.00245351	0.648198	-0.107566	-0.257647	-0.0968703	490.125	476.02	411.154	569.982	541.435	442.62	187.429	460.209	116.945	156.584	303.586	366.076	118.577	134.72	223.849	157.618	100.588	255.4	93.5106	207.985	446.634	387.991	240.479	170.077	215.672	121.3	221.245	393.412	286.62	123.024	0.142567	210.555	123.798	1.70079	0.508767	228.524	294.622	0.775653	0.875919	129.203	125.44	1.03	0.169495
O88312	AGR2	1.79128	3.36439	0.0320521	-0.00291879								574.857	9.36265	200.352	201.631	50.2336	52.4819	122.859	123.705	11.1963	600.399	185.767	116.173	322.712	11.3575	95.9421	98.4403	5.45987	212.166	5.27878	238.309	13.1485	70.1772	653.946	83.8733	0.00215935	609.734	254.218	2.39847	0.687655	9.93489	8.6663	1.14638	0.00810031	199.428	110.146	1.81059	0.896268
M0QWP1	AGRN	-0.0326015	-0.868618	0.147956	-0.0179725	-0.0305868	448.136	532.138	440.689	493.702	505.27	507.536	163.329	92.0032	364.399	278.809	348.341	280.313	352.318	419.345	117.766	164.835	396.692	65.556	220.696	107.752	224.329	199.592	113.172	244.185	110.383	218.357	118.712	211.997	140.904	333.028	0.0384686	156.356	239.287	0.653423	0.139555	116.55	103.379	1.1274	0.575932	335.092	368.23	0.910007	0.784086
Q8CJF7	AHCTF1	-0.0106419	0.0828031	-0.0476641	-0.0334809	-0.0948349	518.017	364.174	490.251	451.957	552.167	568.921	177.495	294.86	134.047	150.853	89.0308	80.7423	114.767	147.545	235.842	189.903	191.765	171.792	133.182	263.438	230.088	231.066	265.033	189.949	314.334	203.721	302.426	205.3	191.588	299.206	0.379261	186.329	162.585	1.14604	0.398947	267.767	290.877	0.920549	0.818875	171.921	187.173	0.918513	0.701339
P50247	AHCY	-0.57537	-0.41519	-0.130062	-0.0354419	-0.0232808	465.283	557.648	379.528	540.006	400.837	578.552	147.81	186.276	156.787	355.34	132.395	131.348	182.736	328.238	154.355	217.158	171.521	75.3311	219.419	180.385	94.3936	97.0564	170.955	175.084	229.501	226.494	190.853	79.1802	178.471	300.193	0.181458	181.146	267.084	0.678236	0.236772	172.054	198.72	0.865811	0.145912	167.797	270.389	0.620577	0.618849
Q80SW1	AHCYL1	-0.0466528	-0.420313	-0.0152862	-0.0218114	-0.0578047	493.895	505.939	395.499	545.549	447.739	542.102	211.619	153.513	192.018	343.599	99.0144	128.336	207.584	282.352	92.9112	291.507	258.731	63.1197	319.295	102.826	73.4844	72.3266	143.416	253.845	171.159	280.722	159.323	85.805	215.45	292.793	0.0852431	239.525	314.539	0.761514	0.72969	131.884	142.499	0.925502	0.492613	234.865	260.91	0.900177	0.707193
Q68FL4	AHCYL2	-0.182591	-0.500499	-0.00318599	0.038897	-0.0836737	475.243	521.535	365.766	563.493	430.466	563.308	257.704	111.85	195.988	394.155	89.0712	99.0458	226.094	301.679	77.0164	289.601	238.289	69.1954	339.512	87.4573	66.5186	68.2331	115.501	248.339	143.236	322.084	137.611	102.421	264.909	289.52	0.0475465	270.738	351.917	0.769322	0.871324	110.043	114.181	0.963756	0.198215	227.538	272.431	0.835214	0.565387
E9Q616	AHNAK	0.595177	0.0707005	-0.657662	0.193361	0.00778142	548.016	437.573	524.67	500.22	523.45	433.903	421.211	131.581	155.737	257.29	399.267	388.323	117.455	73.8205	77.3454	366.354	128.099	547.266	340.08	104.812	403.919	362.087	62.876	112.38	84.6933	386.428	65.7448	450.028	327.372	76.8238	0.405849	371.645	327.933	1.1333	0.0940359	68.6554	107.029	0.641466	0.0878678	132.072	89.3665	1.47787	0.19789
G5E8K8	AHNAK	-0.205111	0.291061	-0.020922	-0.506666								246.201	177.437	200.161	243.876	248.929	270.667	210.408	178.281	347.433	1132.07	151.867	1111	503.052	390.59	1692.85	1635.73	147.041	112.648	191.516	354.593	175.894	383.465	513.652	197.824	0.423657	630.64	367.174	1.71755	0.765387	223.456	253.181	0.882594	0.245154	154.892	195.504	0.792269	0.327735
E9PYB0	AHNAK2	0.0338609	0.073747	-0.0349406	0.473535	0.0105206	525.125	449.974	541.524	516.087	541.01	390.29	713.902	60.5315	177.079	330.706	800.033	536.765	168.2	72.3982	46.3343	287.943	86.8196	756.305	274.588	57.1118	700.196	655.973	60.1263	51.9364	52.8571	371.821	52.3822	2053.86	242.807	18.7753	0.614861	414.884	325.705	1.2738	0.455024	52.9476	56.8335	0.931627	0.760027	105.278	86.4579	1.21768	0.310183
Q8BK64	AHSA1	0.000479751	0.148732	0.102066	-0.0744782	0.131847	504.265	528.617	512.453	479.504	438.966	493.602	243.722	236.957	225.618	128.413	202.725	211.612	217.27	160.939	347.716	144.25	105.227	174.613	101.192	314.083	157.409	187.623	290.633	312.994	264.522	269.359	288.756	93.6719	280.355	254.235	0.443851	222.776	166.321	1.33943	0.280613	309.035	271.854	1.13677	0.958027	214.613	210.815	1.01802	0.490859
P29699	AHSG	-0.238087	0.00703725	-0.0859723	0.00471451	0.439864	536.922	653.815	509.182	506.62	409.634	364.016	202.911	234.993	177.267	224.777	1143.51	913.715	182.154	194.138	132.004	201.557	131.198	487.906	165.728	144.313	381.542	483.169	143.758	116.866	146.564	235.362	166.302	275.238	247.534	156.236	0.759919	217.334	208.622	1.04176	0.453666	147.354	175.29	0.840631	0.18441	141.777	177.51	0.798701	0.897559
O70200	AIF1	0.25972	1.99989	-0.0516628	-0.0011347								81.1284	516.406	132.902	53.5008	78.731	114.246	116.956	88.0345	898.368	84.8993	213.772	195.183	59.2096	1184.29	82.9763	107.994	406.344	101.381	485.93	52.4342	487.968	20.5041	86.5813	108.912	0.000547624	84.203	55.0482	1.52962	0.660285	597.56	728.875	0.819839	0.311946	149.352	104.634	1.42737	0.950966
Q9Z0X1	AIFM1	-0.339326	-0.101713	-0.00381253	-0.0253755	-0.010433	489.54	480.303	483.614	510.37	514.82	465.388	219.391	92.6171	135.636	280.809	763.345	831.28	151.479	199.313	97.9622	196.538	122.575	681.219	243.463	98.0872	918.469	623.372	83.2959	140.167	83.4058	249.181	86.826	756.033	265.622	160.032	0.277107	227.183	257.818	0.881179	0.760533	89.3614	91.37	0.978016	0.113234	132.793	170.275	0.779874	0.584742
Q8BUE4	AIFM2	0.133651	-0.00869239	1.00922	-0.0706679								213.856	148.268	292.473	279.023	497.82	514.331	262.84	303.852	135.161	295.649	478.695	164.052	289.578	138.83	498.11	202.467	866.186	161.56	312.828	118.665	772.593	313.286	127.798	120.557	0.832092	212.435	229.089	0.927303	0.226341	591.313	199.975	2.95693	0.497368	310.91	229.083	1.35719	0.598647
Q3UZG4	AIMP1	-0.162082	0.180651	0.0354828	-0.0183357	0.307438	534.328	517.193	549.645	449.348	494.815	430.202	235.858	157.317	236.265	198.998	245.436	242.991	268.466	227.786	145.55	199.347	213.415	287.17	195.675	178.444	281.077	248.226	232.135	179.106	211.685	191.821	229.859	191.529	251.671	235.167	0.161229	228.959	195.498	1.17116	0.580601	202.515	182.482	1.10978	0.180693	209.595	243.806	0.85968	0.634759
Q8R010	AIMP2	-0.00484366	0.240826	0.00378595	0.128619	0.291415	569.233	487.937	570.636	441.061	456.889	461.691	256.72	222.999	315.355	219.354	140.915	177.5	307.735	342.763	143.185	194.871	219.892	83.8388	140.079	137.624	41.5801	45.8667	187.271	320.136	134.058	157.86	183.625	143.285	206.718	238.181	0.203018	219.436	172.431	1.2726	0.854643	171.361	164.894	1.03922	0.816729	285.128	296.226	0.962534	0.535476
O08915	AIP	-0.167899	0.450752	-0.0425731	-0.00683101	-0.01404	457.563	512.389	465.077	489.947	453.39	552.947	173.777	520.598	99.6066	134.686	154.858	176.642	125.501	143.183	288.461	191.982	163.845	80.5231	166.245	323.982	121.106	115.213	459.696	65.8206	579.806	139.355	501.195	154.984	258.643	161.246	0.12756	208.134	146.762	1.41818	0.595573	416.451	474.795	0.877117	0.366185	109.757	143.31	0.765872	0.823864
I3ITR1	AK157302	0.260022	0.00530716	0.0109825	0.00223277	-0.148628	448.92	581.955	237.829	580.035	414.94	630.781	178.365	206.076	280.315	389.847	488.205	302.148	284.262	362.501	840.061	1204.63	926.609	792.504	888.442	622.339	582.04	651.648	114.594	173.037	74.9463	219.77	87.535	316.529	256.086	128.853	0.910143	546.36	499.353	1.09413	0.884606	347.397	301.12	1.15368	0.486606	459.987	258.539	1.77918	0.913103
Q9WTP6	AK2	-0.228916	-0.37002	-0.193289	-0.0385308	-0.0723739	506.288	462.336	453.656	510.443	509.545	500.69	139.61	143.01	194.692	501.07	173.074	189.279	214.132	472.682	107.608	274.718	229.172	191.346	245.205	114.152	190.595	165.726	100.483	233.626	120.072	232.412	112.15	138.048	191.312	253.99	0.292139	201.88	326.229	0.618828	0.152065	106.747	125.745	0.848918	0.360712	219.163	313.602	0.698859	0.473912
Q9WTP7	AK3	-0.169578	0.269807	0.0540045	0.00136069	0.00107568	488.1	504.127	485.462	499.373	495.06	473.792	312.713	104.706	115.374	264.496	391.28	321.208	151.787	151.441	103.792	320.273	126.558	264.452	214.23	98.495	256.288	253.84	126.774	173.474	131.801	284.876	142.652	196.674	294.033	211.894	0.108552	309.006	254.534	1.21401	0.45027	124.406	111.667	1.11407	0.284229	138.468	171.707	0.806422	0.916888
Q9WTQ5	AKAP12	0.174699	6.72e-05	-0.306453	-0.172609	-0.224866	450.807	411.038	495.329	532.025	537.432	498.563	168.893	334.115	71.4513	95.4817	356.026	350.193	64.1175	44.6955	369.948	84.2959	129.653	235.561	70.5904	442.094	280.396	280.26	249.744	47.8561	457.128	148.085	333.021	68.9999	63.2797	69.082	0.985485	105.49	104.719	1.00736	0.150385	317.571	411.113	0.772467	0.436229	82.9868	59.2983	1.39948	0.424196
A0A140LJJ5	AKAP13	-0.000385653	0.237544	-0.311575	0.134979								238.915	357.851	186.805	187.826	209.378	214.444	149.862	150.937	294.193	238.169	162.546	132.046	136.911	315.925	110.247	95.4885	201.165	129.7	281.939	107.069	256.566	199.455	120.06	183.05	0.310527	199.048	143.935	1.3829	0.125741	250.641	318.572	0.786766	0.940102	159.684	161.283	0.990084	0.426073
Q9DBR0	AKAP8	-0.0813973	-0.351398	-0.190765	0.0365092	-0.0225088	411.188	553.056	441.059	502.689	593.447	417.656	104.002	514.795	171.088	222.717	199.08	178.12	149.903	243.14	301.817	130.791	163.126	113.079	142.924	275.861	96.7977	97.8904	247.879	110.637	312.602	152.773	279.841	116.386	137.777	140.399	0.1831	124.19	172.805	0.718672	0.34379	276.512	367.753	0.751898	0.489032	148.284	177.814	0.833924	0.658231
E9QQ10	AKAP9	-0.379677	0.00285691	-0.0268451	0.193881								295.794	119.462	152.186	325.836	209.667	203.085	161.869	172.587	70.0066	249.994	125.334	251.983	235.314	67.6089	202.778	215.779	91.3113	132.245	92.5019	296.518	92.4546	294.199	334.972	166.541	0.842294	293.587	285.89	1.02692	0.642425	84.5909	93.191	0.907715	0.0490676	136.588	166.999	0.817899	0.205357
Q9JII6	AKR1A1	-0.58083	-0.218387	-0.000139154	-0.17138	0.0185133	508.224	479.193	518.894	493.06	510.243	447.092	225.047	116.116	227.338	297.17	126.084	144.972	303.789	339.962	91.72	221.4	260.267	145.931	306.201	101.913	146.381	153.119	113.093	274.624	109.866	225.78	121.396	103.363	229.522	323.044	0.181507	225.323	276.384	0.815255	0.957845	108.736	109.299	0.994857	0.0202556	254.076	322.265	0.788408	0.19811
P45376	AKR1B1	-0.00164804	-0.184223	0.0314472	-0.0131124	-0.0214617	452.72	543.542	411.489	512.206	407.63	594.406	179.744	175.266	170.145	214.646	266.743	230.22	156.646	148.71	235.447	180.372	130.243	184.384	153.678	207.577	190.057	192.247	236.996	147.795	309.464	220.421	295.418	115.43	107.232	150.246	0.279913	155.783	196.249	0.793803	0.615972	255.954	230.769	1.10914	0.851976	149.394	151.868	0.983715	0.764703
G5E895	AKR1B10	-0.70826	-0.110795	0.165886	-0.424722	0.0047891	462.942	557.403	470.654	496.012	409.518	540.859	134.202	161.679	173.73	378.386	202.61	172.706	207.642	318.951	199.785	232.312	123.281	275.001	162.06	170.343	391.933	355.781	254.812	191.718	292.756	145.592	362.493	87.9071	148.805	244.37	0.539034	171.773	228.679	0.751153	0.372839	272.363	208.259	1.30781	0.0837536	162.91	256.988	0.633921	0.248658
P21300	AKR1B7	-1.15292	9.03e-05	0.236536	-0.00019756								120.2	145.098	204.649	198.527	241.325	180.924	272.551	365.276	195.967	236.451	123.781	38.8176	140.865	155.22	78.3967	81.3862	259.416	237.014	292.445	106.76	374.88	54.9489	93.155	466.031	0.982481	149.935	148.717	1.00819	0.326148	276.754	197.588	1.40067	0.0638827	188.481	367.953	0.512244	0.981204
P45377	AKR1B8	-0.165578	-1.75e-05	-0.0236602	0.066866								212.1	167.953	107.43	479.471	89.2171	75.7309	120.905	279.424	208.358	271.234	131.554	128.087	171.667	169.291	186.448	203.153	83.0563	76.026	81.4428	199.965	74.5729	393.411	364.53	67.1821	0.992683	282.621	283.701	0.996195	0.75525	121.996	139.562	0.87413	0.512046	105.003	155.837	0.673803	0.675349
Q9JLI0	AKR1C12	-1.11927	-0.0212465	0.0748021	0.0299396								358.092	36.15	148.906	356.523	100.423	122.202	241.342	289.15	93.4	243.99	129.647	72.3335	285.013	69.3867	98.6889	127.154	42.8587	211.416	35.3904	347.522	40.8525	233.751	320.273	281.075	0.615288	307.452	329.686	0.93256	0.593096	59.0371	46.9757	1.25676	0.0290129	163.323	270.522	0.603731	0.7351
Q8VC28	AKR1C13	-1.61357	-0.118646	0.100068	0.0887293								332.261	52.0224	142.111	348.716	116.857	147.21	252.119	332.361	85.127	236.535	144.74	69.9413	312.376	67.5096	89.6092	109.298	60.7331	193.422	50.9797	346.398	55.9759	272.345	306.485	353.43	0.260249	291.76	335.83	0.868773	0.387905	67.2787	56.8372	1.18371	0.0213274	160.091	312.637	0.512067	0.605839
Q91WT7	AKR1C14	-3.39649	-0.724704	0.0146315	0.0297722								439.598	16.6295	105.754	527.969	55.9025	42.7883	321.064	330.603	14.3368	275.665	95.2961	106.697	606.988	14.1252	120.694	91.9722	23.9478	110.185	27.3837	434.812	25.044	130.86	318.193	414.625	0.0628522	344.485	523.257	0.658349	0.761023	21.1095	19.3795	1.08927	0.0122497	103.745	355.43	0.291886	0.709922
G3X9Y6	AKR1C19	-2.49305	-0.400346	0.0451642	-0.00692568	0.00417801	499.197	548.572	447.426	509.807	386.737	552.819	313.083	41.6623	99.7592	388.857	83.9893	129.971	272.175	382.983	67.9086	228.508	129.827	52.8005	315.464	44.2718	76.9726	83.9691	47.185	153.129	63.0606	354.757	52.3601	135.636	283.868	400.51	0.0770044	275.153	353.026	0.779411	0.539467	55.8179	49.6649	1.12389	0.01981	127.571	351.89	0.362533	0.845053
Q9DCT1	AKR1E2	-0.569834	-0.57873	-0.000374098	0.0448015	0.018225	538.988	489.88	483.957	445.373	482.649	522.18	171.127	125.979	179.442	245.911	114.09	81.1772	235.214	250.535	141.109	151.885	125.494	124.631	188.424	145.277	186.396	136.885	113.23	240.67	140.318	227.139	153.648	239.53	156.173	366.139	0.056975	159.729	220.491	0.724421	0.93408	135.996	137.192	0.991283	0.129873	181.869	283.963	0.640467	0.652676
Q8CG76	AKR7A2	-0.0150309	0.0206646	-0.245928	-0.0024182	0.134959	512.483	505.245	531.437	439.672	494.24	480.507	259.545	157.61	203.959	189.917	478.535	448.675	293.567	260.104	102.416	196.349	260.833	664.601	260.322	124.639	604.359	629.209	89.2958	212.581	79.9444	186.141	73.2744	494.704	227.812	172.932	0.631419	227.902	212.127	1.07437	0.284787	88.3286	120.731	0.731613	0.7104	225.791	242.201	0.932244	0.865645
P31750	AKT1	-0.00025525	0.0277081	-0.0391535	0.114837	1.07e-05	495.569	489.558	489.384	473.049	481.438	518.802	266.293	257.428	182.698	239.173	441.632	389.522	178.977	174.215	282.379	201.872	168.812	479.728	197.419	274.269	552.489	620.623	189.383	117.838	212.539	123.001	201.369	1178.28	156.169	120.678	0.667674	208.111	186.531	1.11569	0.536704	224.377	248.079	0.90446	0.958412	156.449	157.957	0.990455	0.537691
P10518	ALAD	0.380907	0.0128631	0.595375	0.1149	0.0501834	484.427	488.963	551.996	458.275	500.931	470.551	194.643	119.005	138.48	116.544	420.041	414.639	144.606	114.818	159.293	168.127	216.688	299.129	250.368	139.737	290.786	353.402	224.394	238.105	103.945	204.626	158.425	599.774	254.245	156.532	0.764797	205.672	190.513	1.07957	0.094027	180.704	120.896	1.49471	0.180479	197.758	138.652	1.42629	0.433954
P07724	ALB	-0.0541727	-0.898656	-0.0798578	-0.0414117	-0.00300586	470.426	570.544	398.354	640.04	420.194	427.32	160.538	187.319	187.65	210.876	525.148	588.494	165.159	189.35	113.23	165.976	178.468	537.709	234.626	117.846	691.393	495.079	131.156	142.678	150.477	232.556	148.588	562.261	166.316	204.888	0.0111623	164.277	226.02	0.726825	0.422567	130.991	151.88	0.862464	0.401758	169.599	186.466	0.909542	0.472669
Q61490	ALCAM	0.603539	-0.0511669	0.118384	0.0389875								385.952	46.5757	257.153	316.797	67.1997	77.4476	212.444	187.432	84.9569	319.131	251.764	2.39337	407.094	85.1993	65.3986	35.0317	82.339	237.761	73.3104	337.759	78.741	154.629	241.421	166.264	0.49099	315.501	353.883	0.89154	0.354217	82.0123	68.3618	1.19968	0.0308046	248.893	188.713	1.31889	0.764338
A0A1B0GSU0	ALDH16A1	-0.992968	-0.192475	-0.0643733	0.0280001								111.23	142.25	301.951	259.283	153.142	153.267	322.144	590.154	204.687	234.269	297.546	137.77	226.851	210.492	124.135	175.834	111.025	157.06	188.279	158.8	150.179	204.746	142.195	536.033	0.333121	162.565	214.978	0.756192	0.502982	155.297	180.34	0.861132	0.0871209	252.186	482.777	0.522365	0.606855
Q9Z110	ALDH18A1	0.00499351	0.47074	0.00387375	0.262183	0.0656248	492.178	494.805	532.445	477.276	481.384	476.182	168.736	83.6472	284.399	125.123	136.366	122.249	330.468	438.091	121.469	208.157	446.794	26.8763	181.229	123.149	61.251	57.1858	93.2977	425.087	66.1577	133.086	70.2423	254.948	222.517	342.442	0.0889144	199.803	146.479	1.36404	0.866712	95.0031	90.9845	1.04417	0.819132	385.427	370.334	1.04076	0.46886
P24549	ALDH1A1	-1.34383	-0.447392	0.0899061	0.00230164	0.00173538	478.637	488.172	513.847	514.926	484.694	464.718	228.312	68.3278	150.921	348.725	247.079	314.12	268.637	346.437	73.2965	241.016	187.785	234.133	361.509	55.387	178.188	216.675	65.3298	180.214	46.6049	271.607	56.8359	248.516	266.108	402.111	0.0844955	245.145	327.28	0.749038	0.352697	65.1541	56.7732	1.14762	0.0413078	172.973	339.062	0.510153	0.880403
Q62148	ALDH1A2	-0.691414	-0.033172	-0.0258879	-0.000632608	-0.0462738	434.291	544.744	415.035	522.361	454.244	546.71	206.934	58.3933	234.911	371.406	183.442	175.908	250.603	335.463	54.905	322.281	248.325	84.3338	254.372	46.5155	96.862	68.5452	59.5666	131.336	79.2823	215.523	53.6881	65.4742	219.908	438.947	0.633669	249.708	280.434	0.890434	0.635244	56.0533	61.397	0.912964	0.115641	204.857	341.671	0.599575	0.958657
Q9JHW9	ALDH1A3	-1.193	-0.0135803	-0.351035	0.0333033								175.417	78.7555	339.036	347.973	423.665	320.121	344.143	523.126	57.2738	326.502	252.952	35.131	206.617	50.7762	46.7734	50.2646	44.9625	137.067	65.0285	165.344	41.088	77.3371	153.243	593.075	0.794612	218.387	239.978	0.91003	0.159912	47.7748	64.8534	0.736658	0.0645101	243.018	486.782	0.499235	0.809097
O35945	ALDH1A7	-2.33778	-0.09405	0.221536	-0.00191066								233.234	61.4165	155.032	339.622	216.149	274.428	298.327	363.23	69.7765	289.83	161.877	173.843	351.888	56.9127	162.511	214.223	72.2938	191.543	42.3996	244.94	55.8518	244.205	287.526	352.097	0.353456	270.197	312.15	0.865599	0.182934	65.974	53.5763	1.2314	0.00448093	169.484	337.885	0.501603	0.890899
Q9CZS1	ALDH1B1	-0.920027	-0.000896871	-0.0396407	0.119391	0.00303881	466.505	539.255	476.859	483.921	474.714	498.826	187.583	42.2225	272.788	274.93	128.159	145.055	380.175	507.134	21.7009	213.666	279.126	32.929	222.808	16.3491	49.606	45.7448	26.4577	303.316	29.7779	191.828	28.1493	177.938	276.694	464.205	0.919248	225.981	229.855	0.983143	0.649346	25.436	29.4498	0.863704	0.0404043	285.077	450.505	0.632794	0.574457
Q8R0Y6	ALDH1L1	-0.780488	-0.103537	0.186941	0.302223	0.0694151	509.609	494.514	501.644	488.079	472.175	488.794	190.863	39.357	285.074	265.756	163.042	135.413	349.831	463.041	33.6196	268.065	289.525	132.3	296.4	25.3602	92.7451	111.177	63.1847	255.758	44.7862	208.254	47.1542	134.901	198.866	514.123	0.351454	219.265	256.803	0.853824	0.336003	47.9862	36.5012	1.31465	0.0701529	276.785	442.331	0.625742	0.131057
Q8K009	ALDH1L2	-0.844596	0.221788	0.193626	0.0307983	-0.00517666	479.64	562.559	393.335	546.661	382.077	564.829	238.549	73.7411	208.156	231.824	436.317	392.206	216.571	353.227	38.573	393.137	151.848	252.557	164.742	40.4359	258.418	234.723	188.596	158.053	63.0524	153.173	58.7093	304.044	156.271	656.65	0.374083	262.652	183.246	1.43333	0.523956	95.2928	59.0765	1.61304	0.209259	172.686	408.816	0.422404	0.651375
D3YYF3	ALDH2	0.00171637	0.0120908	0.324446	-0.0163747								287.226	132.452	153.297	264.126	309.31	275.256	159.448	131.219	183.758	241.746	115.64	341.174	315.275	159.199	443.359	308.618	154.864	138.639	133.949	351.211	178.479	305.864	474.239	108.11	0.773452	334.404	310.204	1.07801	0.0700111	172.367	141.867	1.21499	0.882041	135.858	132.925	1.02206	0.693844
P47738	ALDH2	-0.232894	0.0707007	-0.0181276	-0.0206117	-0.000132496	483.418	499.953	487.2	498.172	486.449	488.656	295.358	158.095	110.916	306.433	334.119	350.581	119.659	130.381	124.043	279.601	109.488	317.854	267.811	125.809	352.8	279.242	132.425	110.565	123.189	282.963	128.97	274.729	398.073	123.055	0.410512	324.344	285.736	1.13512	0.589009	128.479	135.697	0.946807	0.0449382	110.323	124.365	0.887089	0.570386
B1ATI0	ALDH3A2	0.0525343	-0.132033	0.0063666	-0.0333384	-0.000573242	483.883	492.287	492.767	495.46	505.096	475.288	188.931	87.4076	212.412	149.924	126.41	123.332	346.956	233.05	56.6285	213.657	387.886	21.536	316.497	58.6741	111.471	100.591	99.3645	354.103	63.3131	260.852	64.7384	139.187	171.961	247.94	0.409023	191.516	242.424	0.790003	0.824712	73.5771	69.7983	1.05414	0.554379	318.134	275.982	1.15273	0.709999
Q8CHT0	ALDH4A1	-0.0577812	-0.436494	-0.261715	0.0518551	-0.0126209	486.324	527.272	426.395	514.107	476.354	506.475	144.865	154.891	223.16	358.788	1236.65	1166.64	174.46	214.678	97.2821	136.396	120.602	1438.5	156.681	99.6208	804.58	758.211	76.7588	136.893	92.6336	182.218	81.3163	556.799	128.648	166.661	0.269844	136.636	232.563	0.587526	0.256597	85.1191	115.715	0.735591	0.53	160.218	185.266	0.8648	0.612784
Q8BWF0	ALDH5A1	0.105984	-0.00360654	0.00666777	7.18e-05	-0.0345385	457.42	510.956	463.07	509.421	491.681	499.052	223.698	40.2269	231.435	181.554	866.541	651.331	240.975	175.979	23.736	227.829	232.554	601.318	272.542	15.9514	595.439	613.103	31.9	301.283	23.4519	295.315	29.046	403.017	273.032	241.479	0.843087	241.52	249.804	0.966839	0.841128	28.2273	26.5434	1.06344	0.324681	255.091	219.477	1.16226	0.980769
Q9EQ20	ALDH6A1	-0.125923	-0.466789	-0.0461416	0.108722	-0.264883	488.414	443.197	425.322	525.835	529.495	517.881	155.727	110.852	149.209	210.892	1458.37	1256.71	127.63	134.788	71.5674	160.066	118.942	1111.6	203.713	69.3331	1155.86	1179.67	75.6929	78.9661	60.098	166.119	62.3204	1603.48	128.355	158.991	0.0621213	148.049	193.574	0.764818	0.58351	69.8602	80.0943	0.872225	0.354773	115.705	140.469	0.823706	0.314404
Q9DBF1	ALDH7A1	0.117411	-0.20571	0.194985	-0.124183	0.00265411	488.11	510.603	484.969	495.68	511.191	456.536	234.108	123.595	217.045	294.217	336.701	291.408	203.863	179.09	126.734	285.536	229.586	346.066	352.747	104.551	371.655	360.716	197.607	180.621	99.7132	285.169	108.477	127.347	267.334	167.5	0.143768	262.326	310.711	0.844276	0.326114	144.273	109.286	1.32013	0.238169	209.084	183.484	1.13952	0.428823
Q9JLJ2	ALDH9A1	-0.597559	-0.0637812	-0.00249867	-0.00411373	-0.1208	491.14	456.521	472.591	508.732	516.714	494.666	135.126	98.7516	253.678	103.508	149.275	169.698	383.775	412.294	114.132	98.1946	324.997	92.3979	134.482	99.5777	112.796	132.023	88.6474	340.488	103.73	139.722	93.1962	156.671	101.426	531.227	0.430434	111.582	125.904	0.886246	0.822003	98.6586	100.686	0.97986	0.0746004	306.387	442.432	0.692507	0.847922
A6ZI44	ALDOA	-0.355749	-0.127661	-0.0903098	-0.00209754	-0.0377107	451.99	526.387	427.045	507.049	445.254	566.099	204.755	144.383	122.132	358.178	604.261	630.178	125.72	165.368	132.373	203.417	89.3325	592.292	231.07	143.197	716.209	643.704	120.478	109.579	115.516	249.651	105.674	755.176	280.324	127.712	0.356565	229.499	279.633	0.820715	0.292272	119.508	134.366	0.889427	0.118127	107.014	139.6	0.766578	0.841984
A6ZI46	ALDOART1	-0.412285	-0.185758	-0.00170621	-0.0273197	-0.0246422	441.144	565.694	381.48	526.411	365.645	633.174	216.493	129.439	146.37	430.23	581.546	612.417	154.189	218.529	108.685	235.347	108.799	588.863	259.49	121.749	771.373	804.246	154.12	126.815	129.867	237.699	110.394	839.149	250.974	156.035	0.343317	234.271	309.14	0.757817	0.877455	124.4	127.018	0.979385	0.132154	127.328	176.251	0.722424	0.599035
Q91Y97	ALDOB	-0.32403	-0.621032	-0.0853738	0.23152								81.5272	48.8828	257.246	173.221	322.713	300.345	444.765	632.33	20.2527	108.575	526.785	74.2149	158.03	16.4178	107.422	103.731	25.8315	438.056	25.5738	115.459	25.1909	422.519	108.658	607.265	0.0850961	99.5866	148.904	0.668799	0.570696	23.7584	30.2915	0.784326	0.199493	407.363	561.453	0.72555	0.456552
P05063	ALDOC	-0.821895	0.00204129	-0.108511	0.0752534	-0.160077	492.614	457.996	443.085	543.387	503.238	494.688	172.242	187.531	60.1015	278.538	266.689	306.675	75.0007	161.153	186.604	140.77	38.3768	497.203	135.665	203.473	585.382	293.044	115.047	46.5388	130.489	223.082	131.242	712.898	349.468	77.0559	0.919405	220.826	212.428	1.03953	0.394522	144.297	173.831	0.830102	0.182036	48.339	104.403	0.463003	0.579359
Q9DBE8	ALG2	0.000261077	0.204539	-0.445014	-1.9e-05	-0.0961073	478.883	456.6	484.524	523.727	510.755	483.022	345.25	280.177	417.915	273.238	261.437	205.412	352.561	340.795	157.971	213.522	276.865	157.119	174.955	289.507	233.465	178.078	226.595	224.597	220.43	166.622	205.369	196.787	245.328	215.581	0.296334	268.034	204.938	1.30787	0.0879491	196.645	263.371	0.746644	0.96417	306.459	302.979	1.01149	0.988491
Q9DB25	ALG5	0.0165895	0.797905	-0.0144151	0.00412027	-0.0450253	480.744	491.024	447.238	539.256	521.703	455.606	323.848	184.164	233.605	180.419	99.618	106.824	223.175	204.806	87.1542	294.207	226.439	133.486	218.741	124.06	103.949	99.9774	190.36	246.207	172.472	204.679	165.886	88.1917	252.638	248.807	0.0308191	290.231	201.279	1.44193	0.752111	147.8	160.232	0.922413	0.537216	235.417	225.596	1.04353	0.821158
A2AKV6	ALKBH3	-0.790015	-0.352274	0.0119038	0.496262	0.0539583	503.36	471.293	596.712	438.859	583.027	377.261	24.7361	88.3028	205.46	847.837	190.401	137.757	199.765	739.529	184.411	182.804	117.425	223.61	123.356	219.666	273.729	169.647	297.016	188.235	328.911	219.052	216.022	977.871	359.711	339.211	0.468301	189.084	396.748	0.476584	0.811294	232.483	212.293	1.0951	0.252776	170.374	426.168	0.39978	0.403805
Q3TSG4	ALKBH5	0.134905	-0.137215	-0.000632153	0.32359								164.943	276.064	176.556	188.501	226.131	173.094	183.808	188.797	410.204	275.939	360.235	104.021	371.734	413.838	71.664	27.5468	252.919	221.409	295.18	231.725	306.409	121.044	172.311	218.595	0.424844	204.398	263.986	0.774274	0.938555	323.178	328.361	0.984215	0.420869	252.733	197.067	1.28248	0.359611
P39655	ALOX12	0.80704	-0.135138	-0.126026	0.0449811								20.9829	419.845	33.1693	34.7153	349.115	469.618	27.0085	20.3814	386.959	21.9082	44.543	1002.64	35.526	530.581	475.722	560.354	442.032	33.4358	473.57	32.13	423.144	453.049	39.2731	24.3363	0.374978	27.3881	34.1238	0.80261	0.209321	417.378	474.665	0.879311	0.0528272	37.0494	23.9088	1.54962	0.672874
P39654	ALOX15	1.08954	0.112379	-0.0426027	0.25683								255.339	225.585	423.727	46.708	133.504	81.9807	315.719	180.633	211.628	104.347	278.331	46.1272	73.4658	121.853	85.0247	92.0221	65.8243	572.806	69.5149	239.491	61.642	246.169	138.562	94.3172	0.576769	166.083	119.888	1.38531	0.719667	113.032	138.984	0.813269	0.104319	424.955	196.89	2.15834	0.438365
F8VPQ6	ALPI	-0.0470453	-1.329	-0.392951	-0.00765493								69.8768	78.1131	184.107	100.296	169.031	230.687	329.249	604.914	31.143	39.0758	415.31	51.3511	148.672	33.095	74.1634	95.1686	17.321	617.886	17.1759	117.015	18.6678	146.829	82.0126	509.437	0.0383584	63.6551	121.994	0.521787	0.38011	22.3773	42.7947	0.522899	0.643793	405.768	481.2	0.843241	0.866953
O08583	ALYREF	0.0111244	0.394333	-0.00568317	0.00722885	-0.0366024	513.229	407.666	497.971	506.195	566.392	457.564	250.381	288.158	149.444	112.64	98.0447	126.399	179.524	122.184	389.48	136.614	163.525	150.302	137.056	405.509	168.641	159.358	276.857	124.976	272.569	154.879	256.871	235.681	204.838	110.533	0.191179	197.278	134.858	1.46285	0.819459	307.736	322.079	0.955467	0.745614	145.982	137.414	1.06235	0.833069
O09174	AMACR	0.158001	-0.014708	-0.0425768	-0.0576474	0.115017	495.765	503.218	566.636	483.261	503.676	410.193	125.067	78.7504	128.691	119.832	906.779	960.745	137.863	151.015	75.9813	149.518	263.766	1207.6	227.119	83.8666	1664.61	1372.86	62.1202	174.028	55.5087	170.159	58.2076	1359.99	202.449	146.178	0.747518	159.011	172.37	0.922499	0.524746	65.4364	72.7086	0.899982	0.384698	188.828	145.019	1.3021	0.519358
Q8JZV7	AMDHD2	-0.392449	-0.0835634	-0.000944814	0.567599	-0.0167972	449.197	473.345	509.079	510.662	553.579	438.493	146.366	181.714	265.755	218.964	110.199	114.095	296.194	398.02	200.141	209.46	243.411	76.9183	216.234	182.141	75.8992	76.2167	183.564	324.967	218.19	290.861	191.692	551.314	262.076	437.051	0.437431	205.968	242.02	0.851036	0.876983	191.799	194.015	0.988578	0.128007	278.044	377.089	0.737345	0.411505
A2AE27	AMPD2	-0.00297132	0.185941	0.000285921	0.821231	-0.000477785	472.054	511.53	481.177	490.62	459.588	524.318	229.821	287.276	295.555	198.415	51.3828	73.3308	265.771	290.365	125.318	119.405	146.914	3223.3	99.1876	142.531	246.668	407.616	329.167	270.529	256.682	205.689	241.592	343.946	371.882	183.973	0.438135	240.369	167.764	1.43278	0.967633	232.026	228.83	1.01397	0.880665	237.666	246.703	0.96337	0.441706
A0A1L1SRX2	AMPD3	-0.0346185	0.17771	0.0799542	-0.0290999	-0.00349717	506.643	435.016	518.765	514.647	478.824	496.203	277.477	189.579	143.38	145.575	442.933	383.722	151.812	110.186	214.346	194.696	82.4129	549.678	114.381	202.338	417.921	498.461	293.033	180.521	296.168	327.954	293.383	146.003	336.282	200.656	0.410501	269.485	195.97	1.37513	0.431082	266.921	229.361	1.16376	0.653445	135.438	154.218	0.878224	0.704567
A0A0G2JEG8	AMPH	0.183923	-0.0422629	-0.000975011	-0.29763	-0.00359632	460.627	536.743	455.285	481.572	492.054	508.407	143.615	143.748	110.679	149.186	120.497	159.413	112.916	79.2106	98.5424	270.249	109.259	231.099	397.848	121.517	320.443	322.646	130.035	232.521	126.503	751.787	156.614	203.249	632.723	132.608	0.731693	348.863	432.94	0.805798	0.912179	128.397	130.589	0.983213	0.412716	150.82	108.245	1.39332	0.276049
P00687	AMY1	0.0837831	1.68642	1.23254	-0.0136295								307.087	30.2786	86.6124	46.7297	153.709	198.333	50.0914	44.0783	70.099	574.016	160.945	148.993	43.6021	55.133	96.3219	133.182	1189.88	11.3084	77.1465	70.4368	93.0498	90.9988	62.9178	94.8269	0.218601	314.673	53.5895	5.87192	0.395217	451.009	54.186	8.32335	0.653723	86.2888	62.9989	1.36969	0.769815
P53995	ANAPC1	-0.00129849	0.37548	-0.160005	0.377519	-0.00034992	508.159	452.393	511.293	488.981	537.104	455.597	252.635	260.967	219.181	146.127	172.412	161.867	198.707	173.838	213.508	162.774	156.561	175.235	118.633	252.612	137.666	132.202	147.33	101.185	144.26	106.849	155.257	267.611	137.208	117.123	0.22087	184.206	123.87	1.48709	0.349116	172.032	219.28	0.784531	0.924407	158.975	163.223	0.973979	0.182508
Q8BZQ7	ANAPC2	0.031528	0.0203897	-0.0333504	-0.368904								284.234	365.389	343.15	241.654	210.312	180.489	309.92	382.415	369.675	303.943	387.775	224.576	269.909	383.523	275.978	331.796	293.685	286.597	250.06	238.335	237.918	95.2284	212.829	232.534	0.610432	267.002	249.966	1.06815	0.596177	300.426	332.991	0.902206	0.590342	339.174	308.29	1.10018	0.226714
Q9WVM3	ANAPC7	0.122776	0.0332142	0.00518662	0.0197435	0.195636	575.246	505.015	511.986	433.314	447.949	507.911	251.662	293.304	288.503	282.923	180.936	184.088	291.508	337.58	597.854	442.714	520.32	464.181	374.113	487.285	271.277	238.325	241.966	266.048	218.582	157.65	228.17	144.717	240.819	211.614	0.680951	311.732	271.562	1.14792	0.883135	355.997	333.057	1.06888	0.450465	358.29	280.234	1.27854	0.784451
Q3TMQ6	ANG4	0.334311	1.57841	-0.231607	-0.0546133								255.171	51.954	649.736	68.8535	166.725	137.346	291.885	483.222	40.1794	821.276	933.289	144.093	134.926	36.4639	126.936	187.364	15.5346	284.243	20.9486	53.3114	18.7553	78.0691	226.873	376.531	0.211834	434.44	85.6969	5.0695	0.38219	24.8231	36.4555	0.680915	0.33153	622.422	383.88	1.6214	0.55844
A0A0R4J1N7	ANK1	0.00639275	-0.00298791	0.28537	-0.0446141	-0.0799836	497.737	436.395	466.884	548.035	533.749	456.639	30.2806	341.894	51.9722	43.1838	1499.91	1598.28	42.9939	46.6125	351.394	53.3725	70.3639	574.898	46.3031	210.574	618.384	1061.94	423.129	17.4979	286.295	33.1095	313.192	654.584	34.7189	40.9924	0.872841	39.4574	40.8655	0.965543	0.173359	362.572	279.588	1.29681	0.861286	46.6114	43.5329	1.07071	0.678151
G5E8K5	ANK3	-0.227446	-0.0165194	0.0313275	-0.00272533	-0.0326727	473.625	493.737	481.638	492.018	491.106	506.903	355.419	83.8356	205.036	355.31	351.718	364.455	231.467	253.001	133.101	234.239	185.567	354.032	324.027	72.1754	332.772	238.882	53.3834	203.448	58.906	365.291	61.8667	199.278	386.627	209.857	0.677284	325.428	348.209	0.934576	0.707654	82.7837	71.639	1.15557	0.0975497	198.017	231.442	0.855582	0.879132
Q810B6	ANKFY1	-0.00335339	-0.0398889	0.00253562	0.00122456	0.0179641	483.11	474.932	546.672	481.013	482.971	482.614	160.942	242.404	162.895	211.747	118.06	101.259	169.479	228.039	280.493	228.337	238.481	210.314	254.283	296.321	164.164	172.049	277.128	225.616	271.574	188.627	266.929	120.356	205.905	250.095	0.512493	198.395	218.219	0.909156	0.792849	274.85	270.1	1.01759	0.847557	208.997	215.871	0.968159	0.925969
E9PUR0	ANKHD1	0.140401	0.00423329	0.00073235	0.198979								248.932	144.342	245.666	165.51	124.753	131.768	235.328	195.733	238.905	164.996	208.939	125.841	174.915	206.124	87.4428	131.38	127.15	286.201	121.248	323.443	115.785	219.286	282.787	200.467	0.869438	232.238	221.29	1.04948	0.946456	160.613	157.238	1.02147	0.245594	246.935	210.509	1.17304	0.338105
Q3TPE9	ANKMY2	-0.268835	-0.067616	0.0125909	0.0256266	-0.0936368	439.777	445.603	512.336	519.008	524.248	486.578	141.109	154.067	211.332	246.506	86.0428	90.8174	236.389	343.766	194.587	209.067	243.106	41.4172	149.143	170.857	86.3367	108.804	245.489	321.133	371.382	267.081	321.779	207.825	215.689	562.764	0.505114	188.622	220.91	0.85384	0.799822	253.952	232.102	1.09414	0.330686	258.524	380.973	0.678588	0.773356
Q80UP5	ANKRD13A	-0.148275	-0.000506884	0.00497582	-0.00441519	0.0194821	455.817	558.058	492.633	482.132	500.728	452.349	118.524	348.343	160.289	142.634	179.956	210.945	149.388	171.102	319.062	117.222	105.129	58.5682	84.3167	288.772	43.4145	75.9509	329.627	121.203	345.521	120.441	359.381	68.2176	107.197	141.8	0.939163	114.314	115.797	0.987194	0.732889	336.024	327.545	1.02588	0.266084	128.874	154.097	0.836317	0.909197
Q99NH0	ANKRD17	0.234933	0.0206394	0.00290145	0.0657308	-0.0255578	472.267	463.6	498.546	494.561	466.824	541.615	283.857	118.018	253.322	139.391	222.199	205.302	241.205	160.779	263.319	149.76	218.26	139.558	175.078	203.607	98.5258	147.007	93.2445	257.582	97.7903	284.184	85.602	170.156	230.505	185.529	0.728037	221.374	199.551	1.10936	0.916064	147.388	139.805	1.05424	0.176238	243.055	195.838	1.2411	0.530281
B2RXR6	ANKRD44	0.0456818	0.0160089	-0.20643	0.0807315								109.235	577.811	154.737	136.151	148.31	136.834	128.925	129.598	422.824	90.195	114.846	94.6703	73.9821	387.165	75.9478	125.357	252.324	119.321	327.151	186.742	296.496	159.503	245.641	91.0153	0.800166	148.357	132.292	1.12144	0.314802	323.882	430.709	0.751973	0.505009	129.635	116.513	1.11262	0.477271
Q8BH79	ANO10	-0.00168135	-0.197972	0.0192772	-0.000331114	0.192579	499.481	504.249	597.198	449.628	506.424	413.062	260.877	109.246	214.495	376.113	224.653	285.634	214.558	285.002	117.497	163.243	207.366	213.167	185.311	111.524	222.247	296.258	119.327	378.567	115.997	322.68	110.388	356.982	239.001	324.249	0.333344	221.04	294.701	0.750049	0.365176	115.737	112.256	1.03101	0.911005	266.809	274.603	0.97162	0.955764
Q6P9J9	ANO6	-1.39211	-1.2449	-3.45e-05	0.241627								66.1206	163.487	196.748	91.7155	114.341	111.858	398.027	620.392	140.694	57.0354	284.731	94.2616	86.7761	134.995	84.6603	81.3108	155.101	313.347	195.878	81.5155	196.944	162.456	52.3442	648.718	0.00637832	58.5001	86.669	0.674982	0.983369	164.246	164.787	0.99672	0.0498119	264.942	555.712	0.476762	0.263742
O35381	ANP32A	0.00461212	-0.0267518	-0.144039	-0.100384	-0.0403806	496.062	506.383	405.22	545.449	440.93	538.918	63.2973	508.462	72.0649	127.062	86.2229	92.4577	80.4688	101.683	255.575	171.623	190.195	96.1466	250.913	270.339	136.551	117.178	332.8	79.6788	437.358	62.545	377.214	114.635	141.937	139.835	0.760686	125.619	146.84	0.85548	0.369198	321.863	405.386	0.793966	0.884758	113.98	107.329	1.06196	0.351488
P97822	ANP32E	1.15294	-0.00932943	-0.501963	-0.0406778	-9.72e-05	548.11	453.523	476.529	487.704	528.26	467.73	206.19	247.169	175.569	121.492	140.959	119.967	183.148	90.748	198.656	248.868	300.866	165.113	318.989	211.798	168.746	180.831	125.646	294.117	199.71	238.284	150.999	116.427	176.12	113.748	0.814769	210.393	226.255	0.929891	0.0858346	158.433	219.559	0.721597	0.0686717	256.851	129.215	1.98778	0.540663
P97449	ANPEP	-0.640174	-0.694769	-0.0474413	0.129685	0.04795	534.855	460.052	545.334	527.074	435.919	462.443	48.3317	33.5899	261.657	60.2407	149.026	180.169	473.774	747.06	32.2643	21.9614	457.3	96.326	49.8894	26.6862	60.3483	73.7805	17.1547	519.323	24.5962	50.0692	25.2866	173.033	27.309	759.219	0.106693	32.534	53.3998	0.609254	0.552432	24.9018	28.2908	0.88021	0.113417	412.76	660.018	0.625377	0.485025
P10107	ANXA1	0.00356318	-0.163346	0.338935	-0.000149062	-0.000482856	553.924	381.014	539.58	532.655	534.046	425.018	287.119	195.414	145.102	347.82	430.461	383.544	130.018	122.564	153.57	297.162	159.071	302.54	456.065	107.345	304.904	205.439	337.389	77.8064	226.984	248.853	306.644	151.895	243.979	114.742	0.337204	276.086	350.913	0.786766	0.266626	265.868	176.581	1.50564	0.864701	127.326	122.442	1.0399	0.976739
P97384	ANXA11	0.000523225	0.00184427	-0.13744	0.0911151	0.126583	489.389	560.69	528.506	475.468	385.025	517.439	325.812	196.295	133.016	244.613	228.72	207.128	134.52	136.85	109.327	314.92	193.779	266.658	386.259	107.861	280.104	273.724	92.9495	197.801	90.362	351.242	98.9454	430.49	364.123	244.725	0.879336	334.952	327.372	1.02316	0.44353	100.407	131.506	0.763519	0.950167	174.865	172.032	1.01647	0.476466
Q99JG3	ANXA13	-1.01168	-0.000355441	-0.0097739	0.0709545								56.1284	25.7906	245.089	44.3391	116.156	147.043	522.567	774.471	9.84112	41.4714	374.55	9.88202	42.3715	6.10217	24.3761	26.0011	16.672	490.491	19.912	83.6007	20.8831	143.901	70.2585	635.409	0.961651	55.9528	56.7704	0.985597	0.839129	15.7987	17.2683	0.9149	0.0543158	370.043	644.149	0.574468	0.696304
P07356	ANXA2	-0.26086	-0.511278	0.14314	0.0827627	0.000108223	549.45	457.095	477.088	527.988	501.843	447.733	214.663	80.5143	238.607	306.15	189.255	171.703	266.561	328.24	80.8013	228.707	226.889	130.649	309.412	59.6153	143.813	119.866	78.899	272.93	75.5654	266.521	89.9883	183.134	255.752	290.642	0.0298874	233.04	294.028	0.79258	0.20992	83.2295	71.8983	1.1576	0.100958	246.142	295.148	0.833963	0.400716
O35639	ANXA3	0.0140564	-0.00456259	-0.0615595	-0.000794279	0.058803	443.813	567.067	527.84	477.579	424.881	500.797	290.055	231.434	101.581	445.14	235.423	160.631	78.095	109.088	108.057	404.338	93.224	308.166	348.334	115.966	266.268	255.914	151.548	96.9853	157.656	265.509	168.703	124.649	322.739	89.9393	0.834773	339.044	352.994	0.96048	0.550958	142.77	168.352	0.848043	0.647277	97.2633	92.3741	1.05293	0.94294
P97429	ANXA4	-0.517342	0.0512061	0.0111866	-0.0722263	-0.00225382	548.14	429.092	487.976	518.821	459.123	515.311	176.233	34.4569	260.268	122.878	247.854	237.997	444.177	494.318	58.7049	120.615	318.668	158.375	131.234	51.3797	195.678	182.429	37.4334	467.491	43.5551	162.557	41.5899	112.42	169.585	581.867	0.484619	155.478	138.89	1.11943	0.751298	45.9094	43.1306	1.06443	0.109669	348.809	506.787	0.688275	0.511976
P48036	ANXA5	0.338951	0.0349013	-0.0149055	0.07266	3.3e-05	480.47	507.717	483.954	515.303	459.722	494.726	282.677	232.618	164.082	254.41	271.161	273.401	133.734	140.257	209.532	192.334	173.463	265.219	221.245	203.191	273.922	262.524	184.144	138.73	171.544	191.41	182.594	396.095	256.688	101.493	0.54754	243.9	222.355	1.09689	0.635824	192.09	202.451	0.948821	0.102786	158.759	125.161	1.26843	0.439336
F8WIT2	ANXA6	0.348993	-0.0121365	-0.0764773	0.000153152								168.27	257.903	203.633	134.203	250.277	271.397	178.754	147.854	249.902	152.125	189.603	288.704	119.46	247.968	361.694	333.108	190.352	195.7	218.411	198.747	210.609	434.937	101.016	163.385	0.761166	140.47	150.803	0.931482	0.319178	216.954	241.427	0.898632	0.0483953	196.312	163.331	1.20193	0.969748
Q07076	ANXA7	0.0596919	-0.218862	-0.00731216	-0.0404377								217.123	193.381	165.324	250.702	174.259	146.605	173.104	152.008	150.849	218.298	210.916	347.45	252.337	160.901	307.5	369.878	182.506	214.652	188.423	304.256	190.751	180.68	246.663	205.254	0.125857	227.361	269.098	0.8449	0.715584	174.702	180.902	0.965728	0.414127	196.964	176.789	1.11412	0.667493
O35640	ANXA8	0.259829	-0.0502315	0.0411088	0.0239849								460.128	11.6531	25.8664	592.725	99.796	134.753	13.7053	42.0551	137.794	621.971	123.446	188.537	730.255	172.551	340.275	236.843	97.4328	478.709	131.889	1086.33	145.86	552.999	972.244	257.332	0.604709	684.781	803.102	0.85267	0.704073	127.029	105.364	1.20562	0.551143	209.34	104.364	2.00587	0.795249
E9PYN9	AOC1	-0.741779	-0.94379	-0.107802	-0.00380417								83.4584	38.5694	290.943	168.544	250.11	297.704	537.469	906.46	18.7695	110.625	592.298	113.016	163.314	18.4502	127.93	92.6992	18.0053	356.953	14.9126	113.422	18.2927	125.133	70.9862	673.188	0.0548057	88.3566	148.427	0.595287	0.525187	18.3558	23.9774	0.765547	0.109287	413.398	705.706	0.585794	0.903407
O70423	AOC3	0.435224	-0.820874	0.0228	0.0182812	-0.00845759	425.631	464.949	547.327	460.326	490.904	541.327	324.807	43.9296	359.866	359.009	121.419	111.617	268.302	212.195	49.5743	191.837	324.176	42.7821	372.431	29.8987	94.6946	62.9982	30.2063	340.708	39.9483	638.072	44.3066	136.566	208.837	302.099	0.1272	241.827	456.504	0.529737	0.657381	41.3624	37.9256	1.09062	0.0760285	341.583	260.865	1.30942	0.76789
O35643	AP1B1	-0.220932	-0.0417735	0.0648791	0.00478957	0.0039438	453.366	559.69	476.723	468.623	409.374	567.966	181.092	176.176	216.674	201.837	212.914	207.85	227.75	250.812	239.849	184.488	212.113	200.036	207.526	187.725	181.442	211.534	200.04	212.099	239.478	157.686	232.405	201.032	155.237	302.823	0.456609	173.605	189.016	0.918468	0.38387	224.098	201.126	1.11422	0.168817	213.629	260.462	0.820193	0.702618
Q8CBB7	AP1G1	0.000459507	-0.0158701	0.118481	-0.000520715	0.00425241	467.869	508.146	513.396	478.894	428.87	544.925	303.618	167.543	308.212	377.82	533.078	510.865	201.942	351.527	193.062	236.965	234.123	124.28	243.115	177.033	175.036	220.047	173.771	222.822	165.196	154.764	187.694	226.82	162.903	200.465	0.771661	234.496	258.567	0.906906	0.105706	184.842	169.924	1.0878	0.951576	255.052	251.311	1.01489	0.96641
O88512	AP1G2	0.0807428	-0.00350859	-0.0277775	0.0608448								202.002	152.376	226.287	173.793	82.0943	77.9862	255.265	221.803	210.708	173.042	231.552	59.6705	208.421	228.015	78.7226	80.8095	124.484	325.251	134.882	231.71	125.206	143.711	222.303	201.887	0.814997	199.116	204.642	0.972998	0.674544	153.466	171.758	0.893506	0.405307	261.03	226.318	1.15338	0.589769
P35585	AP1M1	-0.0541713	0.118675	0.074776	0.0708186	0.102388	478.752	538.819	520.168	464.859	473.608	475.802	237.226	253.54	165.736	126.775	145.375	126.123	197.976	135.304	372.809	88.3565	118.44	113.583	100.245	310.583	135.22	117.449	293.418	161.698	347.737	80.3328	359.23	171.72	91.6156	168.058	0.538015	139.066	102.451	1.35739	0.361861	341.819	303.953	1.12458	0.478351	148.625	167.113	0.889366	0.41459
A0A0R4J1L4	AP1M2	-0.0432665	0.122328	0.0976872	0.500168								378.774	35.8346	273.741	239.216	208.055	169.946	322.33	268.186	16.2775	338.652	290.911	121.386	352.649	12.8224	72.5905	50.7137	56.5232	297.143	49.6799	290.098	57.4247	164.167	311.734	339.524	0.282262	343.054	293.988	1.1669	0.574009	43.4085	32.779	1.32428	0.404091	287.265	310.013	0.926622	0.215877
P61967	AP1S1	-0.0322157	-0.043275	0.00933463	6.5e-05	0.051024	498.079	545.824	506.777	402.865	558.946	448.787	189.516	72.8632	230.11	238.929	329.492	317.665	219.3	248.523	104.214	314.719	328.783	75.8157	347.807	120.017	80.3405	132.064	135.593	183.281	162.004	178.159	139.031	129.578	153.073	367.024	0.634043	219.103	254.965	0.859344	0.796057	126.279	118.295	1.0675	0.645981	247.391	278.282	0.888995	0.988599
P17426	AP2A1	0.00198123	-0.100974	0.0104441	0.004878	-0.0284503	464.407	498.271	470.136	501.967	466.248	532.275	217.284	198.387	187.451	193.303	360.948	338.477	211.373	199.864	227.604	177.211	205.18	188.817	226.105	216.131	193.736	180.749	202.966	235.783	211.199	220.977	212.76	203.223	176.166	206.648	0.247079	190.22	213.462	0.891122	0.548552	214.443	208.572	1.02815	0.829332	209.472	205.962	1.01704	0.86716
P17427	AP2A2	0.000781376	-0.154597	0.356584	0.0349035	0.00098507	488.618	499.979	489.968	489.649	463.811	513.604	178.351	147.991	212.109	162.607	254.062	212.253	257.666	238.668	187.433	136.999	247.098	145.339	203.48	161.458	150.908	133.923	209.02	327.725	187.805	232.381	214.81	162.165	183.115	278.736	0.259373	166.155	199.489	0.832901	0.0634821	203.754	165.751	1.22928	0.921179	262.311	258.356	1.01531	0.633353
P84091	AP2M1	-0.366624	-0.0801909	0.0105703	0.019602	-0.122903	461.706	488.023	469.601	516.542	490.738	505.054	168.465	211.717	243.819	273.872	120.086	155.081	212.959	366.377	182.91	152.703	165.344	157.158	130.75	145.522	137.927	171.289	198.669	204.942	217.487	171.274	223.642	230.49	154.022	290.29	0.513828	158.397	191.965	0.825133	0.721583	201.741	191.575	1.05306	0.186013	204.702	289.876	0.706171	0.704818
P62743	AP2S1	0.074398	-0.114002	0.089132	-0.258656	0.0157764	456.739	555.074	492.788	473.657	435.038	526.57	169.974	195.871	195.821	167.312	178.244	157.277	175.524	191.27	194.72	177.137	280.476	157.772	231.843	164.38	195.194	257.066	197.939	221.657	178.686	158.393	196.802	124.883	118.895	242.894	0.362583	155.335	185.849	0.835813	0.204438	196.487	179.645	1.09375	0.415514	232.651	203.229	1.14477	0.228346
Q9Z1T1	AP3B1	-0.036785	-0.0559256	-0.0103932	-0.053739	-0.0139598	419.164	560.403	427.68	519.178	371.329	615.44	173.941	233.687	223.184	293.633	94.9718	105.375	217.569	328.37	198.179	224.018	219.319	181.101	214.598	186.842	186.303	171.087	188.222	218.63	184.911	180.977	194.86	120.935	207.231	193.713	0.503281	201.73	229.736	0.878095	0.665632	193.754	201.813	0.960065	0.592654	220.378	246.551	0.893843	0.57142
O54774	AP3D1	-0.00566086	0.0519207	-0.00796707	-0.0807501	0.0673847	481.077	565.545	499.138	447.445	425.706	532.032	167.653	194.008	198.572	185.615	174.021	175.459	192.664	220.271	136.486	213.596	129.277	265.849	173.221	157.551	247.385	261.059	179.021	288.402	172.985	194.025	187.941	132.789	226.6	235.857	0.417302	202.616	184.287	1.09946	0.73362	167.816	174.848	0.959782	0.838972	205.417	216.264	0.949843	0.483848
Q9JKC8	AP3M1	-0.112215	0.00531334	-0.0190566	0.0913659	0.131618	465.649	537.432	561.468	459.155	450.568	479.215	330.991	234.79	345.856	292.443	242.328	319.929	332.312	333.062	165.881	165.193	189.041	63.068	180.756	129.108	70.7533	41.6783	159.253	247.267	153.169	312.044	149.35	296.837	330.996	274.206	0.8496	275.727	261.748	1.05341	0.701949	158.161	172.355	0.917646	0.376549	260.721	313.194	0.83246	0.644011
Q9DCR2	AP3S1	-0.308429	0.408609	-0.111485	0.0955797	-0.051233	470.284	498.327	462.904	517.534	482.065	503.281	248.095	197.075	203.638	170.039	133.284	86.0123	214.476	194.533	154.473	171.653	116.202	339.178	93.7591	191.104	224.485	170.549	197.509	168.097	222.943	217.205	188.987	155.521	300.871	233.901	0.199229	240.206	160.334	1.49816	0.232419	180.323	203.708	0.885203	0.167843	162.646	214.303	0.758951	0.564225
Q9JKC7	AP4M1	-0.000102353	0.0522013	-6.45e-05	0.208933								171.798	212.675	193.686	154.216	201.738	160.75	195.743	211.631	41.8965	72.7684	58.4935	873.827	105.512	44.6725	718.084	481.045	189	294.259	164.968	169.653	187.951	1025.15	279.245	144.205	0.657628	174.604	143.127	1.21992	0.987594	139.616	140.772	0.991786	0.982706	182.146	183.86	0.99068	0.464502
A0A0R4J0K9	AP5M1	-0.0215403	-0.45702	0.0011015	-0.130745								164.96	224.175	223.971	258.398	128.767	146.016	213.516	290.121	407.541	292.547	493.477	418.582	459.268	336.217	498.34	311.363	320.835	163.671	585.829	231.53	448.339	130.467	114.043	502.062	0.237415	190.517	316.399	0.602141	0.935237	392.238	382.074	1.0266	0.771079	293.707	335.233	0.876126	0.544801
O88879	APAF1	-0.106674	0.0612027	0.010062	0.957913								241.101	180.635	231.344	144.865	128.574	128.911	219.572	232.263	126.722	127.064	249.87	73.0918	132.412	161.375	101.502	107.732	294.718	156.481	364.235	96.5786	348.554	1873.98	88.647	304.17	0.614205	152.271	124.619	1.22189	0.830418	256.665	235.415	1.09026	0.367733	212.565	252.002	0.843507	0.43061
Q8R5A3	APBB1IP	-0.143753	0.0372161	0.0235576	0.242341								91.4672	439.835	106.511	122.333	75.4452	57.8104	80.9935	118.234	524.065	23.4723	57.0179	92.7149	31.003	419.119	61.1951	82.354	484.152	73.7281	577.23	17.7079	528.601	81.5367	96.6909	96.0602	0.756564	70.5434	57.0147	1.23729	0.573976	512.273	478.728	1.07007	0.350432	79.0858	98.4291	0.80348	0.165681
Q8R146	APEH	0.000360976	-0.00551894	0.182911	-0.0127972	-0.00163652	510.361	476.679	481.924	493.888	503.531	484.4	146.156	168.603	155.941	145.048	431.319	466.293	159.702	180.162	311.003	153.67	176.107	164.335	148.235	223.584	237.877	308.141	215.434	242.926	176.011	154.143	194.597	330.557	139.549	228.555	0.61558	146.459	149.142	0.982009	0.293613	240.345	189.399	1.26898	0.950992	191.658	189.473	1.01153	0.79471
P28352	APEX1	0.0764168	-0.0367759	-0.322555	0.000901538	-0.106387	476.992	456.809	476.157	480.625	510.796	534.908	137.269	324.767	136.097	172.427	61.1561	73.6295	143.839	133.463	284.087	98.0401	141.415	181.303	130.329	358.764	141.244	195.513	230.65	208.986	250.996	204.241	199.82	179.059	210.358	141.939	0.634293	148.556	168.999	0.879034	0.146868	238.186	311.509	0.764619	0.440561	162.166	139.747	1.16043	0.947662
O35841	API5	0.00626272	-0.133499	-0.0728195	-0.0554758	0.0858663	514.865	516.603	507.292	490.461	433.754	495.727	132.799	358.661	178.989	292.366	95.7417	102.905	198.199	186.988	285.663	190.667	188.823	106.191	127.151	318.719	99.5709	107.145	318.455	269.476	320.302	210.095	319.215	82.9418	164.779	225.231	0.432614	162.748	209.871	0.77547	0.222969	307.778	332.561	0.925479	0.792921	212.429	203.473	1.04402	0.345434
Q9WVQ5	APIP	0.0667594	-0.0621877	0.0552722	-0.00245052	0.105474	453.915	556.354	557.785	468.93	397.492	514.323	140.697	167.04	117.727	130.523	427.423	488.377	112.359	73.8343	213.099	127.004	111.229	610.507	184.955	230.583	745.551	660.986	325.294	178.303	361.982	268.367	352.775	796.703	222.302	156.531	0.567545	163.334	194.615	0.839268	0.575644	297.056	253.201	1.1732	0.539242	135.753	114.241	1.1883	0.886054
Q9D7N9	APMAP	0.107819	-0.0777101	-0.14873	0.238726	-0.0137363	472.833	532.936	421.066	541.747	419.003	541.885	208.562	226.482	225.507	247.464	257.13	250.062	189.865	209.265	156.117	237.456	212.55	168.931	196.454	163.426	135.078	140.623	148.448	203.911	170.742	269.561	164.765	289.451	185.108	191.786	0.363762	210.375	237.826	0.884576	0.263126	156.443	186.884	0.837114	0.125346	213.989	196.972	1.08639	0.290411
Q00623	APOA1	-2.59852	-0.144369	-0.755339	-1.28801	-0.149181	436.964	539.413	342.253	590.999	456.674	538.034	55.9094	176.922	115.516	62.8737	1009.14	1540.12	210.156	233.597	80.9723	56.9287	106.834	809.345	70.9723	148.515	1252.99	1586.49	107.501	127.571	125.637	104.852	109.899	855.319	78.107	246.957	0.356199	63.6484	79.5662	0.799942	0.0540981	99.4574	150.358	0.661471	0.0022454	116.64	230.237	0.50661	0.015515
P06728	APOA4	-0.933736	-1.34985	-0.761006	-0.439402	-0.0235661	417.172	560.793	426.458	578.465	453.656	477.212	90.4901	233.037	143.981	166.568	586.098	869.562	283.211	284.369	83.2723	129.06	208.327	498.192	171.675	144.297	558.147	742.566	123.622	195.92	181.918	201.739	133.816	453.099	113.277	287.117	0.011655	110.942	179.994	0.616365	0.0862162	113.57	186.417	0.609224	0.0348728	182.743	284.899	0.64143	0.130796
E9Q414	APOB	-0.773891	-0.01783	0.157088	0.120462	0.211841	520.541	573.208	530.38	538.205	413.436	393.194	37.187	60.4469	362.455	27.9462	234.393	204.626	503.105	591.884	68.9763	39.288	425.863	47.6147	45.7841	54.9223	62.0819	111.682	58.055	438.723	47.1061	41.0322	60.6377	244.519	30.1019	557.045	0.680745	35.5256	38.2542	0.928674	0.175655	62.5563	54.1584	1.15506	0.0157148	409.014	550.678	0.742746	0.558808
P08226	APOE	-0.311299	-0.0705603	-0.0609114	-1.61978	0.105574	452.942	608.89	510.782	466.414	413.536	494.054	239.326	311.99	205.778	200.168	802.88	793.774	221.124	205.561	38.4055	94.5675	145.686	416.783	146.551	43.6932	1343.07	1690.96	215.364	127.462	284.448	175.369	243.587	209.162	90.4198	202.64	0.58095	141.438	174.029	0.812725	0.680301	165.786	213.377	0.776961	0.162146	159.642	209.775	0.761016	0.072555
Q01339	APOH	-0.00490739	-0.2842	-0.365837	0.151636	0.00744748	466.847	561.38	471.442	551.809	492.616	396.767	102.122	216.253	185.549	259.274	595.269	594.624	195.822	279.431	167.612	194.552	312.612	489.856	199.488	217.707	594.57	596.551	116.745	136.466	140.527	134.767	131.243	1442.55	121.613	193.434	0.273546	139.429	197.843	0.704747	0.164722	138.534	191.496	0.723429	0.860862	211.542	222.896	0.949065	0.498316
Q9Z1R3	APOM	0.0457462	-0.00407376	0.0831867	0.000745476								137.43	271.71	200.443	87.0398	1638.45	1945.61	164.832	123.438	81.7291	83.8002	75.4271	447.555	131.123	111.718	543.852	759.799	438.278	390.619	309.373	277.959	387.208	1256.12	245.019	252.666	0.900599	155.416	165.374	0.939786	0.611159	302.405	230.934	1.30949	0.704827	222.163	180.312	1.23211	0.958653
Q78IK4	APOOL	-0.185279	-0.410902	-0.00366678	0.00743382	0.0485558	506.825	476.316	573.399	450.984	563.862	396.148	204.64	125.328	230.572	414.725	638.26	663.933	217.638	302.294	110.863	224.278	222.627	299.274	271.962	110.242	392.947	334.983	134.652	163.188	173.256	211.751	149.327	549.507	155.403	236.548	0.217749	194.774	299.479	0.650375	0.845222	131.614	136.275	0.965796	0.236005	205.462	252.16	0.81481	0.835796
P12023	APP	0.0147212	0.164223	0.00665969	-0.0435439	-0.0267906	477.179	507.743	454.881	500.94	494.623	501.849	241.706	108.81	249.154	226.131	73.3582	108.013	249.52	198.563	155.776	186.693	183.803	203.578	117.347	88.6228	154.931	212.515	53.1623	169.696	46.2512	167.006	54.7248	127.44	210.76	105.543	0.311613	213.053	170.161	1.25206	0.873815	87.8879	81.2281	1.08199	0.758129	200.884	184.542	1.08856	0.651057
Q8K3H0	APPL1	0.0495952	-0.000740395	-0.000752539	-0.679416	-0.020884	471.889	484.335	495.383	508.113	491.356	488.349	272.077	258.264	162.068	207.84	284.961	290.133	182.189	130.203	402.061	282.154	262.914	728.286	409.323	347.61	1381.56	1170.07	197.287	125.782	248.215	194.366	237.926	265.618	240.716	159.758	0.944364	264.983	270.51	0.979568	0.941385	279.091	284.696	0.980312	0.598122	183.588	157.384	1.1665	0.257152
Q8K3G9	APPL2	-0.00171538	0.00274851	0.338648	-0.00415948	-0.0185558	478.707	461.419	507.554	509.452	502.48	482.218	415.294	59.2803	116.804	429.439	169.046	186.716	113.894	127.447	75.3663	354.96	107.095	252.169	398.957	40.9791	221.763	237.713	80.6381	157.537	70.8378	292.1	72.0432	203.867	379.59	148.731	0.843942	383.281	373.499	1.02619	0.152417	76.0159	57.0324	1.33285	0.884894	127.145	130.024	0.977861	0.818835
P08030	APRT	0.144503	0.00360569	-0.0908263	-0.278679	0.0255553	469.49	603.918	449.22	486.322	444.317	489.011	176.714	99.9136	215.267	147.184	114.766	98.6635	243.178	228.963	113.191	247.487	295.113	115.052	214.958	165.259	126.096	169.568	98.0274	421.348	88.8932	261.976	79.4963	50.6258	223.207	260.296	0.854641	215.803	208.039	1.03732	0.479348	96.905	118.022	0.821077	0.383538	310.576	244.146	1.27209	0.271149
Q8CFQ3	AQR	-0.117764	0.203289	-2.55e-06	0.0276408	-0.311554	428.67	466.389	449.273	533.667	551.973	485.794	208.371	311.505	208.322	146.138	451.446	379.633	218.439	175.596	304.928	150.26	140.009	139.159	122.334	287.75	102.865	110.289	314.469	183.113	336.264	163.698	315.643	123.149	170.796	228.606	0.202202	176.476	144.057	1.22504	0.992085	311.68	311.84	0.999489	0.305203	177.148	207.547	0.85353	0.78855
P04627	ARAF	-1.05044	-0.0896509	-0.00169109	-0.13625	-0.100085	431.989	531.706	400.797	511.781	468.325	568.859	211.481	250.869	187.904	360.867	110.498	127.494	213.189	354.324	184.321	165.831	173.593	80.1417	111.136	95.3397	121.445	67.3759	205.382	112.029	319.987	170.154	254.271	57.4607	114.588	304.212	0.584621	163.967	214.052	0.766012	0.923523	214.658	222.065	0.966644	0.064106	157.842	290.575	0.543207	0.408511
Q4LDD4	ARAP1	0.0334681	0.182164	-0.00852116	-0.149995								160.079	437.143	111.004	133.013	199.029	185.352	111.511	93.1761	421.542	158.789	112.666	207.198	142.881	423.318	176.1	321.649	415.899	88.2557	406.017	129.053	405.086	118.9	139.649	82.8538	0.0963154	152.839	134.982	1.13229	0.490497	414.176	422.159	0.981089	0.518801	103.975	95.847	1.0848	0.402422
Q5XJY5	ARCN1	0.137885	0.258279	0.143114	0.0141089	-0.00987801	486.591	481.279	492.116	508.284	487.727	487.702	360.255	98.3639	216.54	225.532	219.835	214.882	207.637	205.543	144.749	245.855	220.815	81.6973	229.023	138.406	97.5344	93.5601	161.686	233.584	171.705	189.997	191.074	148.945	240.586	204.521	0.220658	282.232	214.851	1.31362	0.313994	165.836	136.158	1.21797	0.0698194	223.647	205.9	1.08619	0.805335
P61205	ARF3	-0.0865285	-0.00306578	0.252789	-0.00329212								203.822	120.369	256.012	230.557	150.091	143.801	241.914	303.39	194.543	229.556	194.871	57.9016	207.382	156.856	160.797	135.601	185.152	279.251	175.642	201.026	180.833	211.928	193.036	285.96	0.781429	208.804	212.988	0.980356	0.150818	186.843	150.956	1.23773	0.344854	243.378	277.088	0.878343	0.894573
P61750	ARF4	-0.23586	0.106788	0.0813903	-0.0237737	0.10232	429.325	606.023	558.203	444.659	347.735	558.23	237.13	129.209	240.063	241.812	189.781	176.818	222.016	306.126	251.829	262.703	170.092	49.0693	171.322	196.989	126.216	118.846	159.97	237.414	149.921	197.177	154.625	133.43	204.691	281.844	0.305049	234.841	203.437	1.15437	0.473339	188.808	158.706	1.18967	0.185982	215.856	269.995	0.799482	0.738327
P84084	ARF5	-0.197235	0.133497	0.307215	-0.108539	0.125754	424.781	669.446	521.969	428.299	345.875	552.995	247.753	109.62	260.599	235.935	171.026	169.289	239.034	317.239	231.426	241.252	162.193	50.0579	155.034	176.728	162.407	127.649	197.099	262.665	183.841	187.191	188.419	142.011	196.465	299.724	0.286091	228.49	192.72	1.18561	0.16447	205.648	156.729	1.31212	0.242479	228.486	285.332	0.800771	0.478682
P62331	ARF6	-0.0151051	-0.212166	0.0219925	0.0590771	0.01282	486.941	514.85	506.817	451.412	426.666	562.293	170.871	155.513	187.764	227.158	151.142	171.174	173.188	258.945	241.268	186.333	206.593	21.3738	192.787	193.409	66.5293	75.392	145.773	281.965	159.171	168.538	166.686	231.869	105.762	296.997	0.243765	154.322	196.161	0.786711	0.664902	184.576	169.365	1.08981	0.725668	225.441	243.043	0.927574	0.691758
V9GXM1	ARFGAP1	0.742558	0.163345	-0.520371	0.5021	-0.0722942	461.816	472.336	480.717	493.615	543.169	482.358	314.336	314.633	111.72	155.82	266.465	278.482	97.9725	92.6567	136.623	245.747	157.894	413.7	182.145	161.3	246.865	284.345	39.3915	281.703	33.8077	272.226	47.7334	951.423	208.723	74.2272	0.323597	256.269	203.397	1.25994	0.364701	74.5825	169.913	0.438944	0.198578	183.772	88.2855	2.08157	0.318625
A0A0R4J0T8	ARFGAP3	0.0214465	1.67705	0.0318551	0.772097	-0.0438984	330.024	415.643	615.3	542.008	574.663	425.918	588.07	48.8021	164.753	356.425	141.92	142.349	127.69	175.135	68.2043	777.197	85.9002	212.468	276.224	108.641	105.07	93.5098	128.878	277.353	59.2573	272.5	54.6241	433.063	550.344	164.618	0.0281475	638.537	301.716	2.11635	0.712116	83.9022	72.2335	1.16154	0.755054	176.002	155.815	1.12956	0.229455
G3X9K3	ARFGEF1	-0.0380849	0.000174668	0.0124065	-0.049513	-0.00527879	487.277	457.305	514.634	489.266	501.12	496.396	127.482	155.166	116.346	204.013	97.6685	179.911	140.063	214.623	115.887	215.206	159.093	85.8039	206.624	112.947	126.755	101.736	177.867	233.521	187.178	203.224	194.228	166.538	276.751	223.861	0.969657	206.48	204.62	1.00909	0.751603	162.661	151.763	1.07181	0.622309	169.653	192.849	0.87972	0.599187
A2A5R2	ARFGEF2	0.0913188	-0.00129787	-0.0179643	0.0763562	-0.00212991	501.203	477.523	488.835	480.08	493.08	507.973	95.652	326.891	101.131	140.014	164.35	166.839	97.8337	117.244	213.508	262.697	219.763	204.697	250.694	205.709	232.073	189.837	266.089	251.833	267.877	185.038	265.569	345.439	201.027	234.439	0.930709	186.458	191.916	0.971565	0.670024	248.389	266.826	0.930903	0.547897	190.909	149.839	1.2741	0.532807
G5E8V9	ARFIP1	-0.0138403	0.3472	-0.0176765	0.130347	0.0250195	478.682	501.423	517.433	484.293	478.408	487.151	334.296	114.855	173.047	195.187	137.305	165.511	182.475	176.833	146.848	384.063	238.339	311.214	247.377	176.557	226.837	241.204	130.341	156.983	153.72	182.472	139.326	383.342	193.425	248.359	0.230487	303.928	208.345	1.45877	0.654038	138.838	148.377	0.935714	0.718626	189.456	202.555	0.935331	0.465828
O08691	ARG2	-0.257402	0.0158248	-0.409355	0.00348536								54.1753	22.1017	265.681	41.5676	127.613	142.919	536.805	622.013	16.6918	40.7998	457.991	149.815	36.694	20.9654	107.523	102.326	8.61939	520.282	15.0045	41.772	15.4031	88.2166	33.5421	480.157	0.690843	42.8391	40.0112	1.07068	0.158832	13.5714	19.3572	0.701107	0.225443	414.651	546.325	0.758982	0.856269
A2AH25	ARHGAP1	-0.0106569	-0.100999	-0.0839095	0.00166655	-4.22e-05	470.738	542.2	453.127	508.813	431.8	529.422	203.256	236.854	171.535	252.984	139.673	156.992	192.227	195.072	231.385	284.892	238.124	100.103	264.271	216.384	88.0388	82.4581	171.87	204.666	203.486	327.823	179.473	97.4602	244.779	260.387	0.322342	244.309	281.693	0.86729	0.326184	194.243	218.908	0.887327	0.724959	204.775	215.895	0.948492	0.913299
S4R221	ARHGAP12	-0.288202	-0.110004	0.00300665	0.23013	-0.00889312	523.961	392.387	530.751	522.639	518.399	466.795	159.375	91.2253	276.47	460.107	95.5447	140.155	255.756	644.987	167.685	214.112	201.511	154.302	228.547	202.296	120.817	100.393	158.214	113.215	171.339	200.34	156.346	296.084	309.435	135.322	0.513879	227.64	296.331	0.768196	0.877481	160.748	154.954	1.0374	0.440489	197.065	345.355	0.570616	0.410578
Q811M1	ARHGAP15	0.20748	-0.189115	-0.107263	-0.20807								33.5223	499.355	39.326	29.1561	43.1039	45.0824	31.0155	23.7488	457.391	6.64468	72.8717	313.961	74.6476	540.918	402.872	811.469	313.521	114.353	311.902	150.214	346.364	384.707	116.135	94.2414	0.537111	52.1006	84.6725	0.61532	0.407731	372.425	450.725	0.82628	0.453688	75.517	49.6686	1.52042	0.534018
E9QAJ9	ARHGAP17	-0.678534	-0.00740898	-0.175185	0.101132								117.425	432.06	239.936	230.541	156.876	175.523	240.649	327.104	423.813	111.032	94.0826	100.383	60.9888	475.81	78.6996	83.2798	313.67	111.319	384.515	142.321	355.835	166.813	173.67	204.839	0.855791	134.042	144.617	0.926878	0.187959	364.439	430.795	0.845969	0.140052	148.446	257.53	0.576421	0.493163
Q8K0Q5	ARHGAP18	-0.0622858	0.311238	-0.0800101	0.0169857								144.179	207.57	145.503	147.578	155.265	227.289	199.444	245.249	213.461	184.405	269.186	163.33	141.391	211.207	147.916	159.451	165.871	194.279	199.284	121.077	178.098	264.105	183.988	257.292	0.107979	170.858	136.682	1.25004	0.290322	185.81	206.021	0.9019	0.496908	202.99	233.995	0.867494	0.729752
Q8BYW1	ARHGAP25	0.587077	0.00208467	-0.49714	0.276592	0.0806374	524.539	509.65	494.34	455.985	473.023	503.622	30.5551	580.532	54.6643	30.5075	63.6782	41.742	45.2907	33.9075	487.4	60.5092	130.423	85.0066	34.1562	581.966	60.2188	93.0948	467.331	127.984	533.256	113.726	457.887	140.194	96.1897	93.0824	0.933689	62.418	59.4634	1.04969	0.0129931	470.873	565.251	0.833033	0.208317	104.357	57.4268	1.81722	0.324952
Q6ZQ82	ARHGAP26	-0.0447465	-0.00926617	0.0422495	0.00087877	-0.124486	503.672	444.257	453.61	531.989	515.888	490.492	257.142	212.095	114.15	152.58	110.251	196.164	151.321	152.254	228.125	131.167	153.824	225.467	187.564	248.162	231.208	225.121	367.837	341.527	447.551	430.259	461.72	332.496	317.075	450.395	0.845577	235.128	256.801	0.915606	0.643201	352.561	302.603	1.1651	0.714806	203.167	251.323	0.808389	0.942795
A2AB59	ARHGAP27	-0.829183	-0.616801	-0.083533	-0.116338								98.8706	225.821	163.475	388.933	51.5566	73.8001	148.584	312.821	218.284	147.107	161.884	178.219	231.7	205.507	174.491	218.263	163.845	76.5736	297.474	122.998	245.24	119.519	123.264	324.799	0.245087	123.08	247.877	0.496538	0.410824	209.123	242.934	0.860822	0.139111	133.977	262.068	0.511232	0.526517
E9QMX7	ARHGAP30	0.340734	0.0368405	-0.0252384	0.0268999								26.0208	522.008	25.7013	13.6375	7.19601	2.52225	25.3092	15.9734	551.323	59.0784	114.614	114.109	75.6059	574.28	135.521	197.186	359.765	243.776	261.573	125.584	297.353	291.018	184.398	150.645	0.77156	89.8324	71.6091	1.25448	0.707851	402.813	452.621	0.889958	0.456634	128.031	63.976	2.00123	0.812682
B1AUY3	ARHGAP4	0.267874	-0.023282	-0.0371113	-0.376387								57.9624	422.528	39.6984	19.1263	44.9213	44.0534	37.4279	27.7437	223.411	24.3096	297.916	163.813	44.3469	240.95	189.964	215.907	458.887	34.6145	904.933	87.8403	622.073	36.2721	48.2419	117.183	0.7778	43.5046	50.4378	0.86254	0.725199	434.79	522.804	0.831651	0.549273	124.076	60.7848	2.04124	0.372184
D3Z7R7	ARHGAP45	0.318314	-0.0157748	-0.184174	0.141512								65.0995	611.254	98.4194	70.716	112.092	127.648	79.2603	67.1772	584.061	3.86779	77.3716	100.74	35.4596	619.656	51.475	48.1255	431.188	83.5017	533.553	32.5457	474.965	88.0335	53.2401	60.5136	0.819845	40.7358	46.2404	0.880956	0.175504	496.738	588.154	0.844571	0.105064	86.4309	68.9837	1.25292	0.44715
E9PYT0	ARHGAP5	0.0757668	0.0155398	0.0374277	0.288499	0.0120874	504.319	509.002	477.644	488.796	479.168	491.691	198.18	80.531	223.798	263.835	118.073	126.672	220.681	209.678	120.18	242.267	251.294	18.5936	267.366	101.217	84.5674	98.1392	95.1167	261.937	119.354	259.341	114.718	506.518	423.575	244.806	0.756501	288.007	263.514	1.09295	0.52127	110.005	100.367	1.09603	0.251749	245.676	225.055	1.09163	0.533045
Q99PT1	ARHGDIA	0.14298	-0.0267158	-0.0628815	0.0994286	-0.00305415	472.218	497.043	489.884	520.997	495.015	464.658	160.404	403.167	140.767	119.818	131.649	130.035	103.046	161.773	263.371	182.074	241.719	83.4932	263.218	234.987	129.033	140.214	251.03	110.149	246.203	180.569	243.946	324.434	161.662	109.076	0.682213	168.047	187.869	0.894491	0.520543	252.782	294.786	0.857513	0.437173	164.212	124.631	1.31758	0.590367
Q61599	ARHGDIB	1.09841	0.0574633	-0.00865756	0.3834	-0.0081276	430.579	537.965	469.017	508.726	457.191	521.274	42.9553	527.202	41.3103	29.7186	66.8906	63.3418	31.0874	20.8428	482.96	39.0319	61.2921	128.731	45.544	452.334	70.4333	92.3201	503.78	61.5278	529.279	59.6321	478.027	155.352	79.6054	39.4189	0.601776	53.8642	44.9649	1.19792	0.627279	488.256	502.938	0.970806	0.0501977	54.71	30.4497	1.79674	0.248704
A2AWP8	ARHGEF10L	1.50559	0.0806414	0.719031	0.27524	0.00424425	553.298	422.947	535.519	502.604	580.199	377.176	413.514	46.078	296.756	260.002	328.881	276.286	147.397	102.153	72.4664	331.662	206.267	375.49	371.616	43.078	367.697	321.619	52.4464	196.541	33.7826	383.416	58.2793	757.855	413.908	81.7179	0.379142	386.361	338.345	1.14192	0.0562888	61.064	40.9795	1.49011	0.0401734	233.188	110.423	2.11178	0.346932
Q3U5C8	ARHGEF16	0.180803	0.114195	0.959693	0.220649								434.016	16.5445	251.848	216.936	64.1119	61.577	378.361	189.573	40.3607	788.095	611.558	254.355	633.693	10.8657	175.725	66.0792	24.8334	301.664	25.2601	394.104	30.9652	153.613	402.456	256.691	0.504413	541.523	414.911	1.30515	0.0785093	32.0531	17.5568	1.82569	0.433894	388.357	274.875	1.41285	0.450922
Q80U35	ARHGEF17	-0.0296813	-1.13771	0.0113523	0.00168207								145.06	183.513	216.418	238.779	120.137	210.266	205.96	361.498	343.831	150.377	256.885	1298.1	206.953	319.063	690.235	882.514	238.953	156.288	256.246	220.355	228.354	453.278	157.155	151.262	0.00910432	150.864	222.029	0.67948	0.762036	270.379	252.941	1.06894	0.69922	209.864	239.573	0.875989	0.946089
Q6P9R4	ARHGEF18	0.0879594	0.0881272	-0.0242045	0.500885	0.0779423	545.546	468.689	541.578	448.923	521.984	447.259	163.235	336.08	110.853	140.499	96.8347	108.302	137.23	114.86	518.502	252.81	265.872	210.741	165.864	487.591	193.514	116.206	194.538	98.0585	225.8	181.338	202.98	691.21	161.268	115.637	0.43438	192.438	162.567	1.18374	0.752733	305.34	349.824	0.872839	0.577286	158.261	122.576	1.29113	0.399389
Q60875	ARHGEF2	-5.96e-05	0.250255	-0.000919685	0.21382	0.131611	488.86	522.537	519.94	466.016	470.8	485.619	125.334	483.163	116.977	132.207	157.084	136.195	110.086	118.985	367.374	95.1223	138.433	84.1358	83.8373	332.023	100.738	109.001	453.97	99.2002	453.615	58.053	427.947	269.408	157.706	126.842	0.289089	126.054	91.3656	1.37967	0.909622	416.43	422.934	0.984624	0.974363	118.204	118.638	0.996342	0.41628
G5E825	ARHGEF25	-0.00987147	0.0443367	-0.0687175	-0.000360616	0.0441377	488.649	498.316	515.702	475.536	476.789	495.467	546.42	171.437	417.194	329.023	264.153	310.527	450.175	274.983	153.364	113.352	187.377	1116.9	127.43	164.818	470.885	731.925	90.2085	221.739	66.5558	282.691	85.5813	97.7841	251.612	174.694	0.713328	303.795	246.381	1.23303	0.58094	109.718	134.27	0.817144	0.831277	275.437	299.951	0.918275	0.975353
F6WMJ3	ARHGEF6	-0.00173507	0.00202359	-0.168471	-0.24615	0.000130629	499.879	485.553	492.01	484.276	520.926	467.74	106.274	566.516	101.334	77.5739	117.201	183.9	96.0638	77.9827	393.678	59.8848	91.6201	121.309	96.1096	441.58	109.128	111.256	376.6	70.0224	450.547	54.5601	462.189	48.993	69.3729	94.4623	0.902354	78.5107	76.0812	1.03193	0.202734	410.822	486.214	0.844941	0.875455	87.6588	89.5029	0.979396	0.315852
Q9ES28	ARHGEF7	0.0425522	0.0375085	0.00548924	-0.019235	0.0264841	527.368	470.309	517.976	480.71	512.158	454.248	204.193	354.204	97.7807	129.716	114.604	135.665	94.3249	99.5055	296.594	112.469	134.952	546.614	157.902	282.633	484.128	505.81	362.726	95.7877	418.742	77.2307	440.711	321.798	104.909	103.665	0.660815	140.523	121.616	1.15546	0.808651	366.677	351.86	1.04211	0.50427	109.507	99.1653	1.10428	0.797199
E9QAQ7	ARID1A	0.0361192	-0.00176935	-0.094687	-0.0304096	0.0489407	473.867	547.529	501.187	459.4	506.997	460.161	134.523	375.184	158.425	163.934	91.7084	82.0722	159.959	176.505	430.857	191.916	207.878	126.698	162.112	461.489	137.269	149.113	292.705	202.389	370.498	221.999	319.509	113.147	208.451	189.342	0.890275	178.297	182.682	0.975996	0.355468	347.691	402.39	0.864064	0.479397	189.564	175.269	1.08156	0.631321
E9Q4N7	ARID1B	-0.191888	-0.00642906	0.00528306	0.25467	-0.0277195	478.108	450.58	510.381	481.631	514.382	506.783	208.9	396.666	265.759	239.389	285.069	251.791	258.123	314.835	411.001	102.149	123.878	102.758	109.442	360.81	81.6233	114.265	421.519	258.446	524.404	283.622	497.392	299.329	279.878	264.934	0.859767	196.976	210.817	0.934343	0.795155	443.304	427.293	1.03747	0.303532	216.028	279.297	0.773468	0.387282
F8VPQ2	ARID4A	0.00689756	0.000439498	-0.00288665	0.411128								222.441	372.263	210.811	200.588	242.097	121.742	188.299	173.85	153.731	76.3384	103.624	157.615	111.348	184.218	171.946	196.733	388.729	257.115	445.573	236.526	415.299	443.625	259.852	176.326	0.962541	186.211	182.821	1.01854	0.903115	319.253	334.018	0.955796	0.831374	190.517	179.492	1.06142	0.298072
Q9Z1K5	ARIH1	-0.359551	-0.594432	-0.300717	-0.139133	0.00647178	495.261	558.953	442.698	525.447	422.58	499.326	122.989	335.762	171.475	222.612	123.3	92.2876	180.866	232.619	196.872	177.503	166.781	247.262	216.454	249.203	279.725	258.119	228.914	145.772	344.719	173.995	290.518	87.979	137.475	198.916	0.0595516	145.989	204.354	0.714394	0.158702	238.768	309.895	0.77048	0.0872141	161.343	204.134	0.790377	0.497298
Q9Z1K6	ARIH2	-0.748856	-0.0818768	-0.156734	-0.0064262	0.213256	492.803	546.824	523.218	463.62	482.844	449.386	143.357	242.027	146.991	268.435	183.878	144.877	178.492	177.437	171.537	147.221	137.948	149.394	159.062	163.645	151.142	168.13	168.561	78.5776	302.76	127.81	219.424	111.141	164.796	319.52	0.517551	151.791	185.102	0.820039	0.346421	186.507	236.144	0.789803	0.145274	121.172	225.149	0.538186	0.789743
Q8BGR6	ARL15	0.0145055	0.0545181	-0.161281	-0.0514082	-0.00714987	490.912	454.738	506.873	534.442	501.326	456.573	338.344	377.973	361.99	251.764	404.463	543.073	343.697	264.962	187.909	194.888	266.635	136.1	194.456	199.07	173.69	164.317	179.166	258.401	167.33	206.762	182.902	154.939	219.47	219.913	0.542125	250.9	217.661	1.15271	0.427213	183.326	248.124	0.738846	0.712043	295.675	276.191	1.07055	0.706869
Q9D0J4	ARL2	0.00743752	0.00184778	0.00129097	-0.978061	0.00458212	483.802	507.069	496.66	507.119	441.032	509.036	327.174	160.571	257.456	190.36	102.674	127.213	267.87	244.975	148.091	177.528	206.649	56.7423	213.12	150.595	116.42	119.589	170.28	264.061	160.792	207.138	158.746	2.60866	127.138	184.756	0.9173	210.613	203.539	1.03476	0.827347	159.039	157.319	1.01093	0.758191	242.722	232.534	1.04381	0.144611
Q9WUL7	ARL3	0.301254	0.372931	-0.000269799	-0.26412	0.0398954	500.775	500.428	502.713	475.336	500.868	473.478	274.553	237.977	158.565	179.359	254.512	271.068	148.705	111.054	203.058	209.716	159.947	257.498	211.155	200.346	318.482	271.821	224.135	157.204	190.126	194.236	197.04	183.652	271.21	123.581	0.0979286	251.826	194.917	1.29197	0.938026	208.078	209.483	0.993292	0.107849	158.572	127.78	1.24098	0.139046
Q8R5J9	ARL6IP5	-0.0279785	0.344364	0.0916708	0.0741132	0.26377	496.374	540.705	542.663	455.049	460.029	467.223	299.843	209.849	252.188	227.719	354.723	387.023	213.54	212.113	361.767	203.542	81.735	165.262	70.523	317.907	135.525	124.115	267.244	200.903	207.975	186.895	243.475	300.084	215.723	178.78	0.247473	239.702	161.712	1.48228	0.423922	290.829	245.244	1.18588	0.694209	178.276	201.477	0.884841	0.607795
Q8VEH3	ARL8A	0.061527	-0.105962	-0.046804	0.336885	-0.0817513	502.5	472.453	440.527	507.461	490.079	526.887	244.539	270.169	165.207	208.402	252.802	251.495	175.028	165.105	179.937	164.265	137.303	170.27	226.966	145.788	128.881	120.755	162.253	260.839	153.917	255.586	151.452	318.807	185.716	140.076	0.324628	198.173	230.318	0.860434	0.59441	164.547	189.958	0.866231	0.540652	187.783	160.07	1.17313	0.253976
Q9CQW2	ARL8B	0.206854	-0.07564	-0.0586331	0.0631873	0.000162644	544.785	478.92	459.195	476.04	477.486	522.624	235.63	248.941	173.586	201.919	226.546	241.292	171.878	157.088	169.914	162.001	165.864	270.169	222.439	168.153	256.678	271.209	155.95	257.702	133.077	234.379	147.656	394.768	185.422	135.563	0.37189	194.351	219.579	0.885107	0.535946	157.84	183.39	0.860678	0.268594	199.05	154.843	1.2855	0.504882
Q9D0L7	ARMC10	0.0340746	-0.15877	-0.0370547	0.0948402	0.0247099	506.944	519.41	475.489	486.444	483.616	480.568	193.62	248.505	206.23	220.938	148.629	120.663	188.285	169.412	156.245	158.977	162.48	447.97	217.502	157.419	208.94	218.969	199.481	219.108	211.93	236.764	202.56	141.934	222.687	186.567	0.205506	191.762	225.068	0.852017	0.558027	186.095	205.951	0.903589	0.493396	195.939	181.421	1.08002	0.601061
G3X920	ARMC8	0.250513	-0.0279227	0.163467	-0.650513	0.0585374	509.608	483.701	523.711	472.411	496.738	472.286	182.824	167.443	191.369	182.376	314.933	359.822	178.898	204.734	225.529	172.273	249.86	611.273	214.303	181.376	1193.34	697.818	273.067	210.042	262.008	117.344	246.224	144.146	106.2	133.884	0.662466	153.766	171.341	0.897426	0.268341	248.273	203.609	1.21936	0.175654	217.09	172.505	1.25846	0.247424
A6H630	ARMT1	0.405977	0.0161283	-0.007674	-0.863682	-0.0595712	485.924	485.58	441.866	500.973	469.841	550.883	172.284	249.437	142.399	125.742	370.693	385.313	135.4	118.898	719.906	383.244	365.157	556.088	337.418	802.169	1069.09	1025.04	245.888	181.319	276.747	148.865	244.043	212.765	135.654	148.559	0.809261	230.394	204.008	1.12934	0.877166	403.279	442.784	0.91078	0.298857	229.625	134.286	1.70997	0.169795
Q9R0Q6	ARPC1A	-0.189883	-0.110986	0.00993872	0.0116345	-0.00360347	480.027	529.443	444.872	505.831	468.355	509.379	130.629	299.508	175.991	304.886	113.169	141.825	199.801	372.186	271.866	228.147	229.104	43.2306	197.149	227.747	78.1852	85.1824	412.988	227.837	547.897	174.801	477.048	180.368	188.528	257.305	0.43436	182.435	225.612	0.808621	0.815116	387.3	358.384	1.08069	0.325767	210.977	276.431	0.76322	0.828108
Q91Z25	ARPC1B	-0.00542732	-0.234496	-0.0877616	0.462376	-0.00591862	494.148	449.479	513.416	468.633	523.787	499.077	130.253	310.235	163.469	176.809	69.4477	60.6295	169.984	173.392	309.093	136.845	141.546	202.573	136.522	312.252	61.6452	66.9114	260.259	179.832	355.976	184.077	315.604	85.3308	136.583	155.309	0.166531	134.56	165.803	0.811569	0.247958	294.986	326.155	0.904435	0.735075	161.615	166.228	0.972249	0.313377
Q9CVB6	ARPC2	-0.0532074	-0.359035	0.0358183	-2.76e-06	0.000667097	442.335	609.444	422.661	483.955	399.486	569.449	100.574	353.133	164.4	153.467	77.068	88.3868	155.302	213.446	360.666	132.36	164.463	47.9486	140.688	295.55	41.0447	60.762	364.942	168.385	402.509	128.661	410.022	64.9435	100.47	179.537	0.0896417	111.135	140.939	0.788533	0.477155	378.543	350.398	1.08032	0.419312	165.749	182.762	0.906915	0.996423
Q9JM76	ARPC3	0.000794111	-0.727722	0.0438202	0.219498	0.303458	541.6	536.699	532.392	424.189	448.635	492.802	176.237	201.632	112.514	332.355	99.5642	128.866	132.765	332.559	93.3499	157.754	287	169.993	317.194	106.743	181.25	158.299	308.393	310.859	242.459	230.71	254.896	507.3	239.082	227.864	0.0667966	191.024	293.419	0.651028	0.671624	218.88	183.612	1.19208	0.949564	236.791	231.063	1.02479	0.500335
P59999	ARPC4	-0.23555	0.0267318	-0.00167684	0.0247031	-0.226195	492.391	443.243	442.14	533.317	515.901	506.826	180.968	226.249	163.451	156.052	200.228	182.836	196.43	179.709	559.513	314.098	91.7011	89.0789	270.654	618.551	84.6396	123.823	235.388	170.29	245.963	151.033	252.986	151.779	158.388	174.84	0.707196	217.818	192.58	1.13105	0.935439	349.296	363.587	0.960693	0.233643	141.814	183.66	0.772158	0.7195
Q9CPW4	ARPC5	0.00706521	-0.228936	-0.115487	-0.0193362	-0.0272931	478.678	501.285	452.683	467.605	495.461	541.664	113.268	356.198	175.404	215.804	84.7302	93.01	180.57	252.93	228.54	192.59	303.615	202.986	360.194	226.507	184.289	163.544	226.349	163.282	248.493	166.644	237.002	107.242	218.604	171.895	0.349781	174.821	247.547	0.706211	0.366119	230.63	277.066	0.832401	0.826501	214.1	201.798	1.06096	0.755187
Q9D898	ARPC5L	0.331589	-0.00462458	-0.361738	-0.0139512	0.439539	545.682	535.904	537.643	433.093	448.149	477.916	64.3781	423.166	71.7495	93.3861	189.34	182.252	68.9931	72.6751	245.039	191.482	196.324	247.514	187.255	403.507	294.877	189.391	261.315	226.633	256.681	167.382	263.987	183.245	167.882	163.213	0.875929	141.248	149.341	0.945806	0.183936	256.78	361.118	0.71107	0.335094	164.902	101.627	1.62262	0.734595
J3QNU6	ARRB1	-0.3765	-0.00654095	-0.0355039	-0.202665	-0.000676662	474.089	555.979	428.204	504.263	423.366	548.483	128.495	316.146	151.331	208.725	131.335	156.552	166.523	222.236	232.416	123.255	153.656	123.855	144.523	227.374	126.063	193.397	263.924	163.207	257.247	108.13	240.338	124.433	184.789	247.586	0.828086	145.513	153.793	0.946162	0.506989	245.559	266.923	0.919963	0.141105	156.064	212.115	0.735755	0.239412
P50428	ARSA	0.0123	0.0247372	0.652448	0.00729832	0.0193005	496.575	485.988	557.237	451.08	619.399	353.629	240.472	234.052	182.048	205.34	105.566	224.712	170.248	191.192	280.798	169.785	178.973	133.786	259.755	217.391	197.561	209.162	506.194	316.521	282.844	240.337	428.283	450.483	377.89	265.997	0.700406	262.715	235.144	1.11725	0.126585	405.092	244.762	1.65504	0.774512	225.847	209.146	1.07986	0.876622
A0A0R4J138	ARSB	0.284457	-1.80485	-0.0564167	-0.0562726	0.0180128	496.613	516.894	480.677	488.928	479.713	486.388	97.3209	627.759	137.903	308.09	44.2569	51.041	112.892	132.136	282.053	178.838	201.924	237.547	228.91	229.006	163.646	196.432	365.988	134.613	379.753	270.098	379.622	33.7429	128.963	110.784	0.0153096	135.041	269.033	0.501948	0.614661	342.554	412.173	0.831094	0.206419	158.147	118.604	1.3334	0.712156
Q91WU5	AS3MT	-0.661618	0.0339336	-0.0500164	0.0725367	-0.036029	428.211	570.98	360.215	532.807	329.057	683.369	182.089	206.427	176.926	313.378	129.904	196.565	190.571	356.528	205.775	198.9	147.24	13.1682	108.421	195.133	60.415	20.0226	143.526	138.536	160.543	169.485	156.256	239.555	303.542	249.127	0.690844	228.177	197.095	1.1577	0.470986	168.519	187.367	0.899404	0.142931	154.234	265.408	0.581118	0.698803
Q9WV54	ASAH1	0.454743	-0.0388439	-0.00522485	-0.0173115	-0.0186732	469.307	466.69	510.372	497.165	510.938	485.521	175.131	448.69	146.702	147.364	78.4655	80.1515	129.355	119.396	368.02	130.749	170.865	173.582	193.162	280.786	178.684	163.14	271.632	193.901	232.33	185.763	275.605	129.531	175.102	136.617	0.502226	160.328	175.43	0.913914	0.84527	305.086	320.602	0.951603	0.0770131	170.49	128.456	1.32723	0.759901
Q9JHE3	ASAH2	-0.176908	-0.00378889	0.0142094	-0.00396049								26.7228	15.8759	213.399	33.4288	153.008	233.724	554.674	784.664	24.5012	28.4975	420.522	1.50981	41.6112	16.3992	17.5427	27.1082	13.7264	652.994	25.7047	92.6556	24.6054	100.426	101.673	415.884	0.913185	52.2977	55.8985	0.935582	0.754182	20.9444	19.3266	1.08371	0.40261	428.971	585.074	0.733191	0.930632
E9QN63	ASAP1	-0.0187138	0.182617	-0.036059	0.484669	0.0514457	506.089	543.294	485.972	461.585	426.676	531.498	119.534	341.194	91.315	77.2014	104.273	97.219	90.305	74.2339	304.627	66.6339	80.4096	91.1186	92.9929	353.84	80.8032	73.2379	368.414	62.3206	435.494	84.7789	371.59	343.454	157.962	85.0479	0.378328	114.71	84.9911	1.34967	0.482728	348.21	376.842	0.92402	0.62841	78.0151	83.1956	0.937731	0.362801
Q9D8Z1	ASCC1	0.178436	-0.0025515	-0.0152099	-0.201393								140.148	198.06	186.031	220.95	71.773	76.9961	157.546	194.72	409.953	572.391	451.814	310.839	414.287	465.535	412.722	295.443	195.314	178.272	221.603	258.985	188.658	119.382	134.669	215.674	0.927372	282.403	298.074	0.947424	0.800054	264.642	295.066	0.89689	0.455877	272.039	189.313	1.43698	0.487435
E9PZJ8	ASCC3	0.417219	0.529207	0.048472	0.0875617								233.606	145.928	209.517	152.881	161.849	183.809	215.874	166.587	170.71	288.28	331.4	106.192	226.08	175.913	76.4009	130.613	185.143	354.919	138.707	222.528	147.465	216.314	358.5	236.168	0.108919	293.462	200.496	1.46368	0.418463	167.773	153.516	1.09287	0.16555	298.612	206.209	1.4481	0.521355
Q91X20	ASH2L	0.0475376	-0.0507418	-0.00126899	-0.00168659								168.555	234.115	189.231	182.708	343.714	306.086	209.193	166.417	308.097	196.253	274.767	16.1212	243.224	307.228	52.881	54.9871	237.969	151.899	288.241	145.88	269.796	30.0808	138.053	163.396	0.53246	167.62	190.604	0.879415	0.885656	271.954	276.528	0.983459	0.566119	205.299	179.669	1.14265	0.956001
Q91YI0	ASL	-0.288203	-0.30205	0.0263042	-0.0373618	0.0414268	457.008	534.843	534.395	431.922	464.125	524.244	237.818	190.928	214.743	297.204	121.414	134.554	213.155	267.976	225.106	212.063	216.895	106.448	233.26	205.085	93.7398	109.747	208.126	169.86	233.238	244.992	231.495	76.7855	150.088	261.384	0.152754	199.99	258.486	0.773699	0.465116	221.575	209.75	1.05638	0.112599	200.499	247.505	0.810081	0.563661
Q61024	ASNS	2.50064	2.67123	0.866295	0.522409	0.598468	538.509	520.883	526.413	470.57	452.54	462.867	300.236	44.9019	340.944	111.494	178.196	134.549	231.573	179.673	54.0852	382.877	386.968	58.99	186.007	53.139	77.1841	53.4361	341.819	398.75	33.3207	158.786	78.2782	320.497	330.486	163.353	0.00478817	337.866	152.096	2.22141	0.340575	158.061	43.7872	3.60975	0.00266564	375.554	191.533	1.96078	0.325777
Q8BSY0	ASPH	0.189233	0.0210418	0.174559	0.0320239	-0.120411	513.874	394.018	467.746	544.982	552.109	468.83	142.235	69.8475	134.173	111.821	195.469	177.911	119.83	96.034	149.738	206.449	192.826	232.184	203.058	136.348	315.678	264.929	112.237	228.657	92.8537	246.498	118.176	444.681	274.84	202.755	0.726255	207.842	187.126	1.11071	0.313159	126.717	99.6831	1.2712	0.34421	185.219	139.54	1.32736	0.693791
Q99MQ4	ASPN	-0.425297	-1.79898	0.183306	-0.554585								288.311	26.7004	245.997	506.189	119.134	105.194	346.056	295.083	19.9447	229.784	272.452	77.6514	377.75	2.51172	225.585	188.067	24.4793	147.723	24.8573	512.457	32.7849	112.895	181.803	289.453	0.0156562	233.299	465.465	0.501218	0.439887	25.7363	18.0232	1.42796	0.131252	222.057	310.197	0.715858	0.179935
Q8C0M9	ASRGL1	-0.0384568	-0.00169575	-0.180944	0.0201186	0.0616243	480.412	525.185	522.571	466.508	441.384	514.477	86.324	463.61	89.4584	144.837	676.361	502.239	86.0957	83.0456	255.395	88.1692	62.8151	591.488	103.899	312.132	497.426	511.878	345.99	88.9938	399.178	132.187	352.387	373.824	194.08	94.3382	0.921162	122.858	126.974	0.967579	0.250352	317.924	391.64	0.811776	0.498114	80.4224	87.8265	0.915697	0.677862
P16460	ASS1	0.0773204	-0.29044	-0.072106	0.0337244	-0.0244812	489.103	515.853	426.175	504.472	478.241	523.091	307.105	185.578	144.437	439.652	69.5348	78.3867	123.969	113.703	186.16	249.574	117.587	31.8328	266.703	175.395	43.3569	27.8005	109.097	155.116	117.468	397.86	109.496	72.7576	266.132	135.41	0.206836	274.27	368.071	0.745155	0.50255	134.917	159.48	0.845982	0.33103	139.046	124.36	1.11809	0.702095
Q9D5T0	ATAD1	-0.177086	0.0929294	0.00888584	0.35979	-0.0325448	515.332	469.598	446.959	509.941	468.43	534.291	316.911	143.417	232.452	310.785	578.573	717.116	251.911	224.773	288.807	74.7392	119.056	55.5864	78.8389	174.755	25.7575	44.2491	73.8518	121.613	87.9523	104.71	85.2769	1034.08	276.116	147.652	0.61067	222.589	164.778	1.35084	0.865257	149.312	135.375	1.10295	0.360918	157.707	208.112	0.757799	0.465573
E9Q166	ATAD2B	8.92e-06	-0.00220213	-0.00209623	0.0523113								105.347	226.646	113.356	133.72	60.3923	81.5141	120.956	178.267	260.946	169.507	163.007	176.11	185.164	280.906	157.769	132.601	233.955	243.357	225.964	192.235	224.697	213.865	220.142	219.312	0.896138	164.999	170.373	0.968458	0.839758	239.866	244.506	0.981025	0.99378	173.24	172.845	1.00229	0.646601
Q925I1	ATAD3	-0.657985	-0.105128	-0.158356	-8.37e-05	-0.0879301	461.066	506.408	436.002	517.027	498.364	509.088	286.959	154.151	211.087	263.708	742.502	768.227	231.01	269.165	108.531	158.474	163.131	456.73	203.582	112.634	436.142	382.571	105.384	189.236	134.09	286.386	124.914	375.987	177.143	251.315	0.415606	207.525	251.226	0.826052	0.222451	112.943	133.625	0.845225	0.0260759	187.818	250.497	0.749782	0.982147
A0A1L1SQ41	ATE1	0.0765795	0.154736	-0.00614061	0.182003	-0.188487	452.337	495.78	418.711	531.662	506.837	515.479	258.372	323.418	145.901	175.605	310.491	413.244	130.71	125.613	194.994	197.762	173.118	85.1047	210.443	220.06	49.7827	45.9426	294.35	606.559	455.993	300.766	450.328	426.481	476.626	423.102	0.446264	310.92	228.938	1.3581	0.85312	313.224	333.157	0.94017	0.67346	308.526	226.475	1.36229	0.545601
Q7TT18	ATF7IP	-0.022239	-0.000309726	-0.0160143	-0.194132								96.8091	250.193	145.197	154.177	134.355	268.573	136.666	189.282	350.091	281.595	253.339	189.404	198.401	411.624	157.533	191.748	299.364	134.215	451.786	148.518	382.876	155.012	114.84	268.386	0.969184	164.415	167.032	0.984331	0.713711	344.11	371.201	0.927019	0.722902	177.584	198.111	0.896383	0.296733
Q9CPX6	ATG3	-1.02961	0.466064	-0.0290596	0.013051	-0.0116545	540.824	473.408	432.42	532.964	477.582	494.276	495.951	355.144	250.701	97.478	239.651	215.666	394.478	364.202	264.734	151.362	89.5658	124.349	154.143	196.817	115.819	109.02	210.385	62.0749	206.939	63.201	203.07	119.289	73.4651	164.633	0.407375	240.259	104.94	2.28948	0.662015	226.063	252.967	0.893646	0.138306	134.114	307.771	0.435758	0.798739
A0A0R4J065	ATG4B	0.0549881	-0.000764615	-0.0373856	0.00596232	0.215858	488.732	519.639	588.507	429.755	476.184	462.969	200.129	153.171	182.135	178.668	215.064	223.382	208.916	204.372	127.391	217.076	236.825	280.945	255.198	167.067	260.676	309.421	168.774	368.132	149.946	283.526	139.434	331.903	288.398	260.021	0.928998	235.201	239.131	0.983567	0.457969	145.2	156.728	0.926441	0.570025	262.364	224.437	1.16899	0.799308
Q99J83	ATG5	-0.000783698	-0.0210465	0.145736	0.0139963	0.293116	541.346	490.086	631.577	437.016	515.436	374.363	101.25	183.414	162.803	182.992	87.1706	91.805	185.022	223.151	210.916	196.006	197.067	27.9324	205.138	196.858	79.7517	74.4516	215.266	202.955	200.491	177.163	205.318	160.534	218.404	162.359	0.693838	171.886	188.431	0.912197	0.0622122	210.5	193.588	1.08736	0.912125	187.608	190.177	0.986493	0.821653
A0A0A0MQN4	ATG7	-0.00128395	0.0558306	0.11349	0.0771904	0.0467574	488.279	521.208	517.664	457.109	439.443	528.53	252.577	158.076	218.093	204.485	108.781	107.256	206.047	198.722	184.27	177.211	168.518	94.9964	219.915	179.193	97.0069	97.9819	196.42	191.232	194.114	285.115	213.53	143.059	413.438	181.649	0.596844	281.076	236.505	1.18846	0.197769	198.073	177.128	1.11825	0.870134	192.614	195.473	0.985377	0.40852
Q9CWJ9	ATIC	-0.0839152	-0.313561	-0.0463592	0.0315471	0.00552758	503.792	513.54	471.045	495.368	464.073	501.381	152.633	271.878	180.622	226.056	172.88	179.819	170.723	210.481	228.683	177.695	158.741	171.238	196.391	241.657	154.208	196.714	236.665	191.492	229.478	195.989	229.601	234.001	184.034	210.304	0.0661455	171.454	206.146	0.831713	0.330757	231.649	247.671	0.93531	0.28997	176.952	197.169	0.897461	0.554962
Q8BH66	ATL1	0.0585826	-0.191067	0.218638	-0.0318981	-0.109328	468.07	486.864	420.551	515.362	458.204	575.549	186.108	148.088	310.954	403.929	183.229	135.139	309.257	198.359	191.198	207.554	237.358	441.653	263.38	193.268	458.307	446.794	244.712	344.945	201.086	333.264	222.185	264.843	368.009	278.702	0.327001	253.89	333.524	0.761235	0.164387	219.365	180.814	1.21321	0.480342	297.752	262.106	1.136	0.721997
Q6PA06	ATL2	-0.176762	0.0434296	-0.0868841	0.165279	-0.121362	475.664	481.627	424.182	539.332	461.358	544.851	394.766	208.793	335.682	316.197	911.577	560.933	483.227	432.244	84.5002	110.16	238.976	280.008	107.355	66.8157	362.2	342.425	116.679	202.851	115.39	202.544	104.609	583.021	251.671	164.151	0.693426	252.199	208.699	1.20844	0.568853	101.93	130.333	0.782071	0.423416	259.17	359.874	0.720167	0.458273
Q91YH5	ATL3	-0.360469	-0.559841	-0.00371978	-0.0274172	-0.00250174	477.195	487.265	499.026	471.47	510.536	498.054	152.467	153.386	196.241	249.007	78.9703	60.1947	196.197	227.257	222.85	198.977	151.906	169.95	221.318	230.888	160.504	157.001	168.112	181.84	242.433	202.465	214.532	79.4451	93.7771	363.491	0.11484	148.407	224.263	0.661754	0.841638	201.831	208.903	0.966151	0.233312	176.662	262.315	0.673474	0.73153
Q62388	ATM	-1.84e-06	0.00847299	-0.104413	0.21026								203.171	219.502	175.617	169.695	162.495	178.64	177.569	165.954	175.384	119.655	96.0265	4197.28	146.21	225.409	948.681	1157.11	204.821	244.989	217.889	194.472	216.137	258.784	217.313	173.636	0.787732	180.047	170.126	1.05831	0.206546	198.781	220.933	0.899733	0.997121	172.211	172.386	0.998982	0.620829
O08997	ATOX1	-0.142467	0.0618554	-0.193259	0.10176	-0.0723734	448.319	444.797	503.437	470.75	574.246	489.977	204.317	251.679	160.254	218.338	295.292	300.471	133.233	160.708	181.487	224.301	149.513	440.637	249.337	341.316	278.776	297.994	274.712	98.7504	357.439	216.529	300.668	301.084	374.345	210.747	0.539656	267.654	228.068	1.17357	0.258091	252.289	316.811	0.796339	0.341106	136.172	168.229	0.809444	0.378825
F6Q8D3	ATP11C	-0.0466848	0.020822	0.0276433	0.405198								273.165	454.473	176.102	194.412	269.993	219.909	176.482	166.111	680.598	2.51302	140.913	160.465	63.7474	462.531	149.455	159.034	371.291	164.735	490.399	138.861	502.257	482.471	190.345	175.774	0.812707	155.341	132.34	1.1738	0.640925	518.049	469.134	1.10427	0.361639	160.584	172.789	0.929362	0.306451
Q9Z1W8	ATP12A	-0.3262	-0.90986	-0.0916303	-0.141137								188.711	51.0138	200.454	672.206	193.248	174.475	227.022	326.77	42.2631	330.579	244.918	93.2044	438.284	44.682	194.402	130.498	39.2644	191.476	40.9461	340.34	41.2978	105.277	212.027	277.046	0.120054	243.772	483.61	0.504068	0.253627	40.9418	45.5473	0.898884	0.141148	212.283	276.946	0.766513	0.395423
Q9EPE9	ATP13A1	0.125933	0.537789	-0.000542257	0.000835665	0.00621856	492.906	472.208	526.812	480.045	511	469.128	250.4	116.45	238.109	152.126	102.97	110.896	249.149	209.743	113.73	201.185	272.178	95.3071	204.794	141.886	139.15	111.2	130.671	309.11	105.494	167.599	115.577	170.012	266.462	254.143	0.0650198	239.349	174.84	1.36896	0.921927	119.993	121.277	0.98941	0.235608	273.132	237.678	1.14917	0.933266
Q8VDN2	ATP1A1	-0.219993	-0.158631	-1.43e-05	-0.1568	-0.00491492	485.752	547.309	412.058	527.031	440.481	522.409	241.147	43.5255	226.127	329.924	236.93	245.355	248.801	300.179	34.9215	280.352	207.851	230.618	355.238	31.8025	295.167	273.96	36.3588	241.344	36.5421	291.091	40.3918	249.312	317.227	249.338	0.188729	279.576	325.418	0.859129	0.987196	37.224	37.2901	0.998229	0.122639	225.107	266.106	0.845932	0.140831
Q6PIE5	ATP1A2	-0.506616	-0.570152	-0.0204188	-0.0296737	-0.0174636	474.188	528.449	425.934	535.974	445.873	520.836	182.004	60.5868	213.56	456.557	302.304	283.836	251.724	351.327	31.9303	282.907	253.81	84.2526	350.029	20.7816	196.265	136.356	36.5747	183.986	39.3221	291.856	39.3708	143.071	263.235	299.154	0.109342	242.715	366.147	0.662889	0.748018	35.9586	40.2302	0.893822	0.0835833	217.118	300.735	0.721959	0.732016
Q8VCE0	ATP1A3	-0.483568	-0.532031	-0.0193361	-0.0192197								181.789	59.306	216.38	471.638	220.037	211.085	258.577	362.126	43.4533	285.542	262.532	97.1809	346.535	30.505	171.805	126.063	35.217	185.999	37.1178	292.17	37.0754	143.755	266.776	298.519	0.128452	244.702	370.114	0.661154	0.71562	38.5819	42.3096	0.911894	0.0922743	221.637	306.407	0.723341	0.733597
Q9WV27	ATP1A4	-0.254485	-0.538584	0.0495639	-0.0720252	-0.00325394	435.971	641.697	350.553	561.681	349.166	574.197	192.297	61.5111	225.516	477.866	213.746	208.716	261.387	371.811	33.4846	303.388	283.01	98.6734	365.887	10.7145	215.828	142.839	60.5751	236.546	57.7742	281.472	63.2847	165.867	237.301	305.686	0.134587	244.329	375.075	0.651414	0.660755	52.4481	43.3333	1.21034	0.172615	248.357	312.961	0.793572	0.510211
P14094	ATP1B1	-0.478503	-0.689681	-0.118632	0.00185571	-0.00286784	461.266	588.9	389.309	553.266	378.807	552.83	164.622	24.5412	174.787	375.918	138.924	152.386	224.47	364.905	13.4552	281.866	274.272	87.5689	305.415	16.8075	116.731	75.7724	15.4965	200.98	15.6023	254.864	18.1208	128.799	114.925	392.278	0.116187	187.138	312.066	0.599673	0.370127	15.6908	18.9836	0.826545	0.156808	216.68	327.218	0.662188	0.905137
P97370	ATP1B3	-0.133378	-0.376754	0.0138932	0.0682353	0.00422862	495.555	538.096	455.066	508.167	456.607	492.171	134.634	305.915	339.067	328.515	264.119	222.054	221.504	361.609	278.623	135.844	226.328	274.886	149.273	261.846	315.286	260.469	407.694	187.324	389.418	222.591	334.528	371.723	183.118	358.508	0.250527	151.199	233.46	0.647644	0.708685	340.281	319.06	1.06651	0.386464	250.906	313.873	0.799386	0.439244
Q8R429	ATP2A1	-0.424151	-0.00250523	-0.00252324	-0.0175234								145.779	61.246	96.6644	169.059	1424.22	1489.54	98.2715	109.948	85.9267	122.935	57.8053	945.491	122.937	93.8727	1383.24	1356.48	65.4476	82.8135	70.94	162.797	68.4053	1574.81	174.288	115.133	0.858797	147.667	151.598	0.974075	0.866788	73.2599	75.3529	0.972223	0.112214	79.0944	107.784	0.733822	0.669481
O55143	ATP2A2	-0.298221	-0.139839	-0.173534	-0.00346724	-0.0189314	472.283	509.673	456.837	520.114	464.586	511.19	75.5214	43.5005	94.8961	95.2542	1726.45	1855.36	100.776	105.756	26.534	59.1405	56.9181	1571.76	67.8471	45.4731	1962.26	1834.31	40.7291	93.1796	38.4054	97.1118	38.1465	2201.71	82.3837	114.078	0.292175	72.3485	86.7377	0.834107	0.231542	35.1365	42.4597	0.827526	0.170427	81.6646	106.87	0.764148	0.816297
E9Q559	ATP2A3	0.019697	0.147887	-0.141707	-0.176726								301.668	184.902	113.162	261.167	364.482	393.915	106.416	100.283	125.869	243.596	100.96	352.076	242.516	139.895	501.458	355.247	142.336	110.427	168.477	228.774	155.591	314.882	295.28	106.212	0.179997	280.181	244.153	1.14757	0.225422	141.265	164.425	0.859149	0.422815	108.183	104.304	1.03719	0.231346
G5E829	ATP2B1	0.00871625	-0.0229534	-0.04867	-0.0515569	-0.00918331	458.742	557.154	415.233	495.15	435.717	565.41	365.137	103.994	275.039	357.5	199.289	205.561	242.562	234.603	97.0534	236.675	199.858	205.65	302.804	108.195	207.907	190.939	76.2204	232.04	79.8782	336.265	91.5368	140.927	323.761	200.24	0.609155	308.524	332.19	0.928758	0.452529	88.2702	97.3556	0.906678	0.721801	235.646	225.802	1.0436	0.445867
E9Q828	ATP2B4	0.126279	-0.530564	-0.0481129	0.0461208	-0.0164582	458.537	529.762	442.195	480.009	467.32	552.447	323.573	70.2246	241.011	396.092	170.087	189.44	253.806	214.489	88.481	236.445	251.926	151.579	302.106	91.9876	144.06	139.534	33.5556	245.969	32.5129	471.157	38.7124	201.587	236.831	152.993	0.109939	265.616	389.785	0.681443	0.669999	53.583	64.9083	0.825518	0.312713	246.302	207.096	1.18931	0.482123
A2AKU9	ATP5C1	0.00846608	-0.182905	0.0577082	-0.322675								221.592	50.578	182.014	198.624	1088.69	889.903	219.255	166.326	68.0527	169.355	158.643	794.009	194.577	73.2814	1184.96	1162.61	82.9761	302.07	82.5042	290.241	81.8774	326.748	150.188	218.182	0.286405	180.379	227.814	0.79178	0.467098	77.6354	68.7879	1.12862	0.805687	214.242	201.254	1.06454	0.259763
Q03265	ATP5F1A	-0.133752	0.0164627	-0.0408473	0.0108855	-0.118254	464.497	500.651	427.503	528.883	490.369	514.773	184.695	70.9571	124.329	163.092	1353.76	1275.51	132.965	127.647	64.3839	115.393	93.2535	1088.53	127.322	67.3546	1291.44	1239.13	57.7147	113.621	54.1658	140.01	55.3432	1547.32	161.162	119.205	0.68395	153.75	143.475	1.07162	0.448645	59.1473	64.1592	0.921883	0.21041	110.401	126.606	0.872009	0.691482
P56480	ATP5F1B	-0.241232	0.37674	-0.0267576	0.0489102	-0.0129293	445.467	541.89	445.916	524.966	498.966	470.409	170.249	65.9837	75.8209	136.348	1649.92	1431.38	82.8731	96.174	68.6079	136.052	75.7604	1395.78	116.225	77.6632	1505.48	1337.29	62.8439	85.3301	61.0945	123.079	60.8884	1533.24	205.579	115.881	0.143239	170.626	125.217	1.36264	0.504848	64.1134	68.2471	0.93943	0.172442	78.9705	98.3093	0.803286	0.321993
Q91VR2	ATP5F1C	0.00831688	-0.16805	0.0590985	-0.317194	-0.0262238	458.062	490.178	488.875	509.023	468.798	518.337	221.592	50.578	182.014	198.624	1088.69	889.903	219.255	166.326	68.3381	170.094	158.333	802.559	190.823	73.2938	1191.99	1157.66	82.9761	302.07	82.5042	290.241	81.8774	326.748	150.188	218.182	0.306159	180.625	226.562	0.797241	0.462031	77.7305	68.792	1.12994	0.807428	214.139	201.254	1.06402	0.262802
P56382	ATP5F1E	-0.928613	-0.0289011	0.0404239	0.296576	-0.489908	373.857	477.883	231.563	675.395	345.37	747.591	132.646	65.9374	204.103	661.633	352.358	309.862	274.906	668.742	22.4026	645.775	318.152	371.834	228.202	27.1588	278.032	332.933	90.8846	168.068	140.384	125.671	178.362	364.346	40.902	525.075	0.806639	273.108	338.502	0.806812	0.74824	97.2163	77.8269	1.24914	0.140427	230.108	489.575	0.470016	0.0590721
Q06185	ATP5ME	0.00734108	-0.0212523	0.0271582	-0.0316044	-0.53007	418.179	461.813	375.475	605.549	549.472	487.212	212.853	90.4226	179.922	169.328	1353.32	1096.8	160.653	154.892	31.0225	165.479	79.3425	1112.85	244.184	45.0719	1195.74	1189.12	132.429	384.366	118.769	149.52	132.235	664.31	136.622	275.738	0.683852	171.651	187.677	0.914609	0.750365	98.562	84.7546	1.16291	0.870997	214.543	197.094	1.08853	0.622241
P56135	ATP5MF	0.0531375	-0.103551	-0.141699	0.358966	-0.133676	499.653	446.676	456.831	529.137	513.794	493.161	156.895	106.69	111.329	252.198	2173.63	1991.68	99.995	154.854	38.6831	110.764	124.944	2589.03	193.272	47.5961	1767.01	1730.52	50.5673	128.667	41.0395	174.052	53.1342	2096.88	237.792	55.406	0.443905	168.483	206.507	0.815871	0.489006	47.4615	65.1084	0.728961	0.593084	121.647	103.418	1.17626	0.0764744
Q9CPQ8	ATP5MG	0.0127639	-0.0587761	0.0041827	-0.158277	0.000812333	471.448	471.275	536.724	509.037	497.931	458.604	181.977	66.3701	168.205	164.247	1192.13	1143.94	181.15	176.148	54.7932	128.926	151.94	1180.88	180.856	63.6057	1651.5	1219.52	71.8259	256.607	60.7849	215.896	69.343	927.623	188.481	182.009	0.446505	166.461	187	0.890169	0.78024	65.3207	63.5869	1.02727	0.738247	192.251	179.769	1.06943	0.275436
Q9CQQ7	ATP5PB	-0.361485	-0.360165	0.0589058	0.0524892	-0.0905306	453.466	536.896	369.353	550.315	448.717	556.307	190.436	64.2743	189.288	362.895	577.397	570.909	186.354	311.635	46.4149	116.698	93.5519	1831.32	127.359	37.5958	774.238	886.808	97.6156	219.454	109.746	244.289	114.259	420.066	147.379	235.203	0.301943	151.504	244.848	0.61877	0.623934	86.0964	70.5386	1.22056	0.217533	167.431	244.397	0.685079	0.702209
Q9DCX2	ATP5PD	-0.425255	1.05429	-0.287002	0.00702518	0.000899886	478.6	526.319	472.97	470.334	483.025	511.677	189.5	68.2353	124.617	143.928	1784.04	1459.67	167.723	123.186	48.9827	219.639	88.8269	699.465	145.295	80.373	770.225	693.329	51.8973	79.0995	47.3407	105.156	44.2769	677.787	188.101	119.166	0.017342	199.08	131.46	1.51438	0.217256	48.3856	65.3163	0.740789	0.134033	97.5145	136.692	0.71339	0.866569
Q9DB20	ATP5PO	-0.337287	-0.198263	-0.00260093	4.17e-06	-0.115151	439.07	500.23	436.499	570.241	476.266	495.5	114.926	50.8097	104.109	159.241	1417.85	1063.13	120.797	141.627	56.4062	123.801	110.911	1092.67	153.881	64.666	1558.25	1272.27	57.8352	116.354	67.5138	126.954	64.7055	1387.44	134.883	165.649	0.144775	124.537	146.692	0.848965	0.830424	59.649	60.9965	0.977908	0.122159	110.458	142.691	0.774106	0.993973
Q9CYN9	ATP6AP2	-0.00890307	1.02979	-0.0222778	0.17814	-6.52e-05	479.854	468.49	522.874	494.827	561.079	420.542	325.084	153.846	218.287	191.67	117.974	136.944	170.222	189.981	59.7095	303.161	88.7734	267.477	230.239	94.9406	231.13	240.424	132.021	212.34	136.549	238.643	154.247	522.168	321.106	194.748	0.010765	316.45	220.184	1.43721	0.718911	115.326	128.445	0.897861	0.806834	173.134	184.983	0.935941	0.491107
Q9Z1G4	ATP6V0A1	-0.000508296	0.070937	0.168286	-0.023568								265.637	254.74	141.968	207.173	227.517	237.935	121.393	138.749	239.587	155.917	120.598	141.187	135.329	189.661	195.965	173.246	272.567	190.293	236.12	176.887	285.085	190.034	187.367	199.447	0.490709	202.974	173.13	1.17238	0.18328	265.746	226.84	1.17151	0.946498	150.953	153.197	0.985355	0.635901
P15920	ATP6V0A2	-0.0288683	0.0414246	0.471618	-0.160362	0.102129	440.217	688.496	489.974	422.435	304.088	599.108	206.331	132.69	232.547	207.769	122.078	134.552	209.199	272.314	383.942	117.547	131.242	123.817	71.8516	234.61	132.291	129.807	232.765	295.019	226.938	185.066	274.941	99.9486	218.315	253.85	0.651424	180.731	154.895	1.16679	0.156463	297.216	198.079	1.50049	0.657623	219.603	245.121	0.895896	0.154549
P51863	ATP6V0D1	-0.301603	-0.323208	-0.000487733	-0.0124341	0.00444555	467.578	571.696	451.342	475.9	433.543	538.384	173.551	246.742	192.453	259.058	134.308	149.328	178.913	196.627	423.986	102.479	107.854	170.107	121.001	418.906	153.925	107.655	227.394	158.531	263.636	210.268	262.767	76.659	125.86	230.945	0.261422	133.963	196.776	0.680792	0.953705	304.716	309.761	0.983712	0.178093	152.946	202.161	0.756554	0.768525
P50516	ATP6V1A	-0.0273832	-0.332063	-0.0389335	-0.033025	0.00432159	506.49	520.011	462.688	482.627	462.144	515.667	189.032	182.429	175.669	249.982	121.565	134.896	157.854	228.564	120.913	233.475	208.869	359.765	270.848	188.807	236.986	318.862	205.381	196.259	258.993	227.45	232.161	100.692	182.685	245.925	0.0823144	201.731	249.426	0.808779	0.598141	186.152	210.076	0.886114	0.598108	193.599	210.781	0.918484	0.735084
P62814	ATP6V1B2	0.0792125	0.045271	-0.178403	-0.126786	-0.135673	482.828	480.538	464.314	497.072	510.27	503.516	223.195	261.117	160.926	190.085	215.845	204.988	153.696	165.163	195.33	287.968	182.632	395.268	311.183	260.416	391.125	447.465	199.286	174.216	192.365	208.694	197.768	193.494	287.551	161.893	0.541504	266.238	236.654	1.12501	0.217396	197.461	237.966	0.829787	0.181935	172.592	160.251	1.07701	0.459268
Q9Z1G3	ATP6V1C1	0.0651126	0.112377	0.0342889	0.0388578	-0.000184251	474.316	538.494	451.679	509.225	437.6	525.609	300.115	305.705	153.252	193.822	195.575	199.576	163.953	159.664	353.051	241.154	198.746	111.837	203.866	261.635	124.246	60.9418	247.427	179.014	250.455	139.425	291.126	142.468	133.505	158.491	0.455633	224.925	179.038	1.2563	0.530824	297.201	272.598	1.09025	0.341095	177.004	160.702	1.10144	0.672564
P57746	ATP6V1D	-0.0486092	0.00796658	0.0225344	-0.11408	-0.0375735	488.825	487.266	479.293	501.855	495.089	491.001	261.797	287.843	175.497	236.682	231.682	219.266	168.689	173.252	342.59	232.611	202.849	293.176	235.528	300.619	331.098	350.073	307.998	142.381	376.264	176.094	377.965	227.752	184.08	243.239	0.756236	226.163	216.101	1.04656	0.570411	342.851	321.575	1.06616	0.514355	173.576	195.06	0.889859	0.362295
P50518	ATP6V1E1	-0.00287612	0.0676281	0.000668058	0.120678	-0.0140402	501.591	509.529	432.491	509.187	479.705	509.251	216.754	208.43	170.878	191.207	184.889	214.187	209.797	173.653	317.239	199.775	187.888	92.1835	163.728	261.401	73.3604	84.8978	164.259	199.929	161.121	203.748	162.052	221.914	193.596	186.544	0.293629	203.375	186.228	1.09208	0.9475	214.517	210.317	1.01997	0.795095	186.232	189.998	0.980179	0.517626
Q9D1K2	ATP6V1F	-1.87092	0.787324	0.00165098	0.00471845	0.00877458	477.712	551.334	466.44	461.124	474.386	513.038	207.502	336.115	109.746	208.177	145.218	150.736	154.899	156.417	511.412	235.121	5.19264	52.8708	25.1296	503.995	36.3532	33.3535	399.627	51.5624	368.603	130.904	327.846	40.7043	267.417	178.454	0.152242	236.68	121.404	1.94953	0.898642	412.962	402.904	1.02496	0.0628138	55.5003	163.257	0.339957	0.910117
Q8BVE3	ATP6V1H	-0.00556862	0.0565247	-0.00494557	-0.205153	8.67e-05	492.237	533.041	448.672	498.655	444.948	525.14	243.939	231.314	196.391	214.665	97.9221	96.349	212.817	179.778	219.398	227.832	197.048	115.676	244.926	215.464	125.013	127.634	229.67	201.947	230.806	222.269	217.807	56.3975	258.947	218.401	0.271545	243.573	227.287	1.07165	0.609284	222.292	225.861	0.984195	0.709325	198.462	203.665	0.974454	0.279214
Q148W0	ATP8B1	0.0251793	-0.0051407	-0.33129	0.403636								210.205	34.717	177.269	236.888	78.3686	71.6883	234.587	236.497	20.5244	281.744	279.246	169.009	309.017	22.3839	90.2659	96.8954	9.61505	293.958	13.0596	213.623	14.4075	153.123	239.371	216.959	0.805097	243.773	253.176	0.962861	0.312228	14.849	23.3869	0.634928	0.629584	250.158	229.347	1.09074	0.228555
H3BLL2	ATPAF1	0.0572871	-0.319388	-0.00101053	-1.07725	0.339942	500.935	542.296	543.8	461.492	445.856	469.084	114.933	90.1851	144.187	152.654	631.34	728.734	146.648	184.453	139.711	176.365	263.694	747.062	282.547	168.999	1727.17	1502.42	104.612	248.33	115.255	213.596	122.363	368.266	167.301	233.849	0.230094	152.866	216.266	0.706845	0.925826	122.228	124.813	0.97929	0.543034	218.737	188.317	1.16154	0.122263
Q61687	ATRX	-0.00159141	0.163865	-0.145421	-0.0857275	0.0020458	509.861	498.112	478.088	452.551	501.434	512.888	144.833	326.626	143.67	132.469	108.665	90.8574	129.333	112.591	268.457	165.518	107.735	260.317	124.615	315.121	285.057	245.885	302.313	186.808	364.861	153.243	320.684	113.777	158.86	209.071	0.142235	156.404	136.775	1.14351	0.148016	297.151	335.536	0.885601	0.915437	146.071	150.331	0.971662	0.582403
P28658	ATXN10	0.195425	-0.0949581	0.0718569	-0.252178	0.00133802	489.106	540.475	451.92	499.05	441.701	520.533	100.677	145.947	107.034	100.723	290.814	295.103	99.8687	61.3634	359.637	424.07	407.898	419.689	562.634	477.709	449.659	425.826	405.286	111.326	498.545	171.618	614.479	100.305	50.61	224.906	0.665672	191.786	278.325	0.68907	0.573635	459.801	374.067	1.22919	0.52466	208.753	128.713	1.62185	0.334207
E9QM77	ATXN2	-0.0613373	0.405021	-0.117382	0.019258	-0.165657	468.539	464.559	406.946	531.197	448.897	599.421	467.243	308.348	378.093	196.175	1342.04	1289.95	354.225	443.651	101.682	237.834	168.666	304.103	214.002	115.717	451.686	354.613	154.662	368.357	108.709	191.362	134.172	777.146	252.912	280.713	0.249291	319.329	200.513	1.59256	0.547103	130.172	177.592	0.732986	0.551216	305.039	359.53	0.848438	0.808954
A0A0U1RPL0	ATXN2L	-0.048267	0.175131	0.00941148	0.0143155	-0.0995414	506.422	428.495	456.87	503.162	475.587	568.547	162.744	261.137	181.16	247.016	173.655	204.673	183.548	218.249	264.783	437.641	238.699	67.0713	227.958	210.581	12.3269	37.1764	442.452	68.5481	617.954	95.1323	478.982	54.5442	214.952	173.65	0.457834	271.779	190.035	1.43015	0.837827	395.406	363.224	1.0886	0.625164	162.803	191.816	0.848746	0.858593
A0A0R4J023	AUH	-0.322554	-0.0120714	-0.0129561	4.13e-06	-0.133099	473.891	489.942	404.819	552.979	460.117	541.954	140.277	112.596	128.524	141.159	1503.67	1511.89	139.783	119.18	80.6071	124.967	99.7649	1809.66	119.062	91.8327	1486.44	1321.65	113.514	103.611	158.231	145.459	142.368	1011.99	124.526	223.453	0.617836	129.923	135.227	0.960779	0.758761	112.163	120.887	0.927834	0.252438	110.633	160.805	0.687996	0.99468
Q3U3K9	AUP1	-0.218369	1.54931	-0.00435252	0.333119	0.0767566	486.247	498.43	549.688	485.612	491.186	444.403	204.944	360.234	216.749	162.111	129.139	143.28	206.499	317.574	367.681	333.149	228.57	36.6551	88.6464	276.154	18.9238	33.128	270.341	102.333	278.061	138.779	243.535	192.74	348.879	212.696	0.0495345	295.657	129.846	2.27699	0.827261	293.852	304.816	0.964031	0.308841	182.551	245.59	0.743316	0.416683
O70126	AURKB	0.0146001	0.782405	0.682951	-0.000772729								242.145	120.232	247.184	96.3207	262.285	301.735	300.222	203.919	144.505	160.381	220.725	32.858	131.343	133.304	53.1886	42.4268	388.703	323.545	124.063	168.125	230.899	87.8004	312.52	236.248	0.121085	238.349	131.93	1.80664	0.213016	254.702	125.866	2.0236	0.705126	263.818	246.796	1.06897	0.967156
Q8BGF0	AW551984	0.0277136	-1.38529	0.228724	0.0559311	-0.048483	479.533	460.875	495.678	483.597	501.416	519.442	244.259	85.3115	207.204	347.244	188.659	158.8	208.681	204.206	116.324	265.062	282.56	149.08	360.798	97.7663	170.885	156.677	115.309	208.876	119.153	403.304	135.478	197.109	222.691	233.554	0.00501498	244.004	370.449	0.658672	0.153033	122.371	100.744	1.21467	0.565752	232.88	215.48	1.08075	0.390881
Q64726	AZGP1	0.249632	0.115634	0.260892	-0.600507								164.691	116.357	118.931	98.9317	806.305	814.828	110.364	106.677	126.707	163.179	188.916	705.596	175.548	116.402	1022.46	1135.08	148.292	173.743	126.883	176.468	150.388	567.459	217.332	151.532	0.378193	181.734	150.316	1.20901	0.0837297	141.796	119.881	1.18281	0.225446	160.53	122.858	1.30663	0.0683968
Q9JI67	B3GALT5	1.54192	1.0681	0.090211	0.450997								770.452	2.19588	13.8118	470.392	64.5743	60.3887	9.2137	5.85347	28.8602	647.077	33.532	66.6863	531.23	34.2554	43.7957	29.4646	15.2573	13.5675	17.342	423.145	27.48	63.6336	858.372	1.81436	0.0262605	758.634	474.922	1.59738	0.604363	23.8658	17.9311	1.33097	0.146927	20.3038	5.62718	3.60817	0.148364
Q5JCS9	B3GNT3	-0.00838549	0.0465638	-0.404841	0.899927								462.471	92.5099	185.164	759.863	171.097	116.279	140.216	244.616	29.4859	429.71	116.45	112.498	513.048	38.1103	101.131	43.739	11.276	61.0588	5.7524	246.97	21.9248	195.796	934.021	16.2099	0.667135	608.734	506.627	1.20154	0.435472	20.8956	45.4575	0.459673	0.875394	120.891	133.681	0.904325	0.0939887
Q09200	B4GALNT1	-0.206227	0.00187775	0.000298211	0.184047								140.138	129.196	252.351	193.515	192.864	169.367	275.029	475.195	143.659	161.982	258.721	90.8049	143.874	121.548	78.7641	109.143	122.687	255.444	127.356	131.988	114.323	204.53	178.161	275.824	0.877653	160.094	156.459	1.02323	0.932116	126.89	126.034	1.00679	0.323456	255.505	342.016	0.747056	0.390304
Q09199	B4GALNT2	-0.492233	0.01231	-0.377991	-0.0748373								351.824	30.8004	290.191	383.398	75.7183	97.0405	264.062	455.127	16.326	333.494	242.159	28.4542	190.157	16.446	43.0745	41.4815	8.48737	215.02	17.4867	191.603	17.2099	38.5911	151.884	406.782	0.80385	279.067	255.053	1.09416	0.247503	14.0077	21.5777	0.649177	0.147064	249.123	375.323	0.663756	0.608692
Q3UI43	BABAM1	0.221695	0.114233	-0.200343	-0.0477848	-0.000172485	478.45	459.73	532.017	449.752	577.012	452.186	294.083	288.089	157.712	114.278	330.647	292.163	179.207	122.82	306.013	312.814	386.768	849.603	420.47	365.538	678.737	638.23	172.829	75.859	179.481	99.8856	123.661	115.673	253.021	78.131	0.548728	286.639	211.545	1.35498	0.372815	200.834	277.703	0.723198	0.485499	206.78	126.719	1.63179	0.703059
Q8K3W0	BABAM2	-0.126403	-0.213211	0.0679318	-0.0149584	-0.0651936	484.336	459.377	484.923	507.709	524.387	479.824	119.203	196.997	198.516	273.066	226.172	213.993	181.662	360.67	193.115	128.143	147.899	238.823	114.569	202.009	216.431	205.46	319.268	281.747	339.411	176.787	367.074	126.613	155.754	256.942	0.363887	134.366	188.14	0.714181	0.537798	293.153	246.139	1.191	0.432822	209.387	266.425	0.785915	0.718356
A0A1L1SRT0	BAG1	-0.723477	-0.162887	-0.0121467	0.0970388	-0.00575819	579.593	449.421	427.636	470.096	503.36	533.944	181.98	180.374	243.993	399.167	413.888	314.934	208.194	319.763	159.591	211.658	155.967	121.7	198.113	203.521	101.736	123.715	216.787	99.8345	333.589	143.274	287.05	195.417	134.749	315.171	0.462953	176.129	246.851	0.713503	0.78075	221.143	239.161	0.92466	0.109903	166.598	281.042	0.592786	0.598935
Q91YN9	BAG2	0.200082	0.0375084	0.188095	-0.210859	0.0337883	537.424	484.306	493.125	488.952	480.063	478.63	358.016	77.7346	267.498	230.174	414.193	431.772	253.235	191.939	73.1872	176.834	235.506	474.717	163.133	49.3097	460.92	647.076	74.3091	327.556	40.1294	280.634	66.7727	316.546	236.092	233.838	0.640702	256.98	224.647	1.14393	0.298335	71.423	55.7246	1.28171	0.204925	276.853	226.337	1.22319	0.252867
Q9JLV1	BAG3	0.199517	0.122017	-0.137807	0.0217511	-0.162886	461.173	444.512	488.264	534.852	516.07	485.623	232.554	31.6387	128.471	115.932	1034.54	988.618	136.853	54.1785	39.5321	177.93	95.8954	1424.57	174.43	56.9894	1580.22	1256.11	25.7165	139.396	28.2775	224.156	24.2616	1720.35	215.236	79.3115	0.369635	208.574	171.506	1.21613	0.438799	29.8367	38.9685	0.765662	0.342029	121.254	90.1143	1.34556	0.675936
Q8CI32	BAG5	0.295064	-2.95e-07	0.00739599	0.0759676	0.0163182	515.527	463.323	530.326	469.341	519.227	462.569	196.964	166.045	175.798	158.064	247.434	235.262	194.511	122.218	212.476	185.751	205.718	206.799	228.646	221.376	261.889	193.878	196.635	244.589	177.23	291.143	177.454	359.673	294.881	163.811	0.99876	225.865	225.951	0.999621	0.733428	195.522	188.217	1.03881	0.168682	208.702	160.18	1.30292	0.476719
Q9Z1R2	BAG6	0.0227192	0.576266	0.0320481	-0.255525	0.12822	483.238	505.062	578.281	453.234	492.477	448.347	225.264	220.414	208.811	166.329	330.763	357.158	192.53	166.334	210.829	189.344	163.198	213.133	141.134	195.699	310.91	300.129	236.15	184.432	220.655	160.496	223.34	203.808	194.85	165.514	0.0307648	203.153	155.987	1.30237	0.369316	223.44	212.256	1.05269	0.542821	185.481	174.793	1.06115	0.206366
Q8BKX1	BAIAP2	0.00257641	-0.0576389	-0.0240284	0.652049	0.0605576	473.864	537.12	512.019	460.642	463.013	501.807	260.019	259.162	166.346	212.969	107.429	117.253	138.774	161.201	111.986	219.784	124.415	124.058	481.845	254.394	157.46	70.9165	306.565	284.823	266.529	299.735	281.005	923.519	354.964	252.621	0.591396	278.256	331.516	0.839343	0.703299	233.185	260.028	0.896769	0.904032	191.861	184.199	1.0416	0.422074
Q9DBJ3	BAIAP2L1	0.366287	-0.133203	0.255618	-0.125577								398.564	4.23359	237.349	326.883	102.761	92.9168	226.065	211.935	11.2859	372.617	163.913	165.436	360.202	8.46749	170.194	175.493	19.288	479.17	21.7205	572.719	22.3387	74.1625	223.212	76.5955	0.407129	331.464	419.935	0.789323	0.387179	17.6375	11.4739	1.53719	0.336692	293.477	171.532	1.71092	0.44529
O54962	BANF1	0.884841	-4.72e-05	-0.000341342	0.00045869	0.00483196	462.458	485.388	555.389	401.345	607.944	439.407	200.262	176.718	177.948	135.42	211.668	185.666	184.254	91.1453	179.833	128.589	262.151	1.80377	203.782	109.354	240.409	88.3846	122.258	319.986	108.502	240.149	87.0443	313.509	247.671	143.925	0.98473	192.174	193.117	0.995117	0.961512	129.712	131.525	0.986215	0.0930746	253.362	139.775	1.81264	0.970014
Q80VH0	BANK1	-0.00220981	-0.0622601	-0.363778	0.088538								4.61934	1375.03	47.2502	25.7092	134.656	78.7748	43.2777	40.8267	436.49	20.887	42.3881	194.685	47.3251	497.843	141.728	201.714	484.509	45.0476	510.956	96.7075	432.855	186.398	100.884	53.3221	0.713941	42.1301	56.5806	0.744604	0.35835	451.285	794.609	0.567933	0.839382	44.8953	45.8088	0.980058	0.493486
G3UWZ0	BAZ1A	0.0271826	0.503789	0.0787883	-0.267474								535.564	121.668	438.776	116.569	155.759	140.101	301.614	199.425	319.205	97.1794	158.983	402.147	83.7756	325.915	488.796	469.942	383.921	176.562	451.422	79.8909	404.97	133.841	86.9462	166.785	0.426351	239.896	93.4117	2.56816	0.548071	369.365	299.668	1.23258	0.745863	258.107	222.608	1.15947	0.397547
Q9Z277	BAZ1B	-0.0466015	-0.074022	-0.0774185	-0.474234	-0.0317476	525.525	466.407	439.976	530.325	482.458	502.049	117.032	339.217	180.033	150.651	124.252	123.267	167.709	190.566	270.563	108.569	164.384	162.195	129.25	302.274	210.075	265.224	320.503	183.514	381.195	168.846	329.176	85.5335	165.566	213.385	0.423042	130.389	149.582	0.871684	0.310173	306.747	340.895	0.899827	0.39272	175.977	190.553	0.923507	0.203698
A0A0R4J0B5	BC017158	0.0989753	0.00329518	0.00061183	-0.00878522	-0.00600012	455.969	452.798	534.436	470.325	598.84	428.707	251.572	221.56	249.79	266.616	172.488	155.191	249.08	296.183	235.139	383.701	351.446	402.447	309.013	267.701	254.815	536.685	221.866	403.685	175.362	242.378	216.114	292.031	213.378	307.25	0.866751	282.884	272.669	1.03746	0.926003	224.373	221.541	1.01278	0.382728	334.974	284.171	1.17877	0.852671
Q9R069	BCAM	-0.00379294	-0.482056	-0.0846411	-0.315273	-0.00423899	476.601	449.831	526.902	470.41	568.722	453.471	166.988	250.165	217.625	263.171	506.172	512.812	212.571	185.915	136.46	100.248	148.818	766.567	194.421	140.727	1030.98	763.14	157.465	126.212	124.375	327.823	127.09	269.801	240.036	115.533	0.172058	169.091	261.805	0.645865	0.51237	140.338	171.756	0.817082	0.867101	164.218	171.34	0.958437	0.286452
Q61335	BCAP31	-0.835499	-0.205482	0.0176274	0.196071	0.007179	522.982	464.19	514.617	513.008	513.441	431.178	123.103	230.56	234.471	268.778	111.355	101.162	264.865	326.382	233.458	204.762	223.952	48.6757	138.702	184.08	18.7413	40.1856	221.902	167.433	273.404	178.743	279.004	77.3071	100.287	321.338	0.352147	142.717	195.408	0.730357	0.649324	244.788	229.348	1.06732	0.0291425	208.618	304.195	0.685804	0.451698
Q61140	BCAR1	-0.598142	-0.156609	-0.015957	-0.169782	-0.00115854	535.403	421.028	513.263	501.064	524.528	464.41	236.859	132.419	279.273	179.764	334.447	241.846	338.094	395.232	97.0059	225.771	274.822	544.016	350.735	138.403	682.045	541.307	137.081	305.751	169.331	264.203	174.825	161.47	156.14	368.078	0.36829	206.257	264.901	0.77862	0.707566	136.304	146.718	0.929022	0.0211567	286.615	367.135	0.780681	0.453662
Q9D287	BCAS2	0.0827312	0.0879712	-0.0339678	0.214795	-0.137119	479.933	503.804	349.901	563.009	435.822	584.683	227.061	379.791	189.173	198.633	88.7823	71.5818	235.487	168.483	359.045	173.663	279.938	5.52886	200.101	357.95	72.999	59.3662	306.711	194.492	283.804	158.417	274.889	274.672	233.602	161.714	0.338814	211.442	185.717	1.13852	0.518357	313.549	340.515	0.920806	0.437323	221.201	188.562	1.1731	0.560898
O35855	BCAT2	0.201907	0.103398	0.134921	0.0787781	0.0142463	526.478	451.747	539.798	470.992	546.463	429.952	185.897	146.914	150.428	206.067	930.515	789.898	101.568	109.134	186.284	250.781	116.938	657.887	170.626	161.905	624.274	608.726	190.688	113.99	143.772	203.774	146.581	726.125	227.031	103.257	0.291877	221.237	193.489	1.14341	0.227989	174.518	150.863	1.15679	0.190707	127.119	104.653	1.21467	0.393135
Q03311	BCHE	-0.268401	-0.199407	0.177333	0.0980328								107.078	22.5508	255.374	202.638	138.307	124.052	414.507	521.18	23.3415	117.125	298.872	78.1569	191.695	23.2459	132.105	145.434	33.0761	606.229	23.6817	287.789	27.6192	325.87	269.67	734.112	0.373237	164.625	227.374	0.724025	0.225879	28.0123	23.1595	1.20954	0.30812	386.825	556.6	0.694979	0.594064
Q3U3J1	BCKDHA	0.0449912	-0.125563	-0.00841165	-0.125478	0.00177029	480.354	518.603	487.91	473.608	562.265	424.93	175.251	129.823	150.707	166.328	1122.69	1130.14	133.948	139.043	63.2832	119.527	137.33	598.248	234.539	67.5928	842.843	820.969	106.639	141.594	89.3269	128.932	99.2089	473.578	131.517	136.477	0.397739	142.099	176.6	0.804636	0.809128	89.7102	95.5808	0.93858	0.224502	143.21	136.489	1.04924	0.436362
Q6P3A8	BCKDHB	-0.23966	0.0147333	0.332522	-0.373395	-0.115382	493.552	400.278	490.587	523.211	524.167	506.521	157.455	84.3445	156.857	165.318	1018.54	999.429	148.181	136.555	44.2142	119.33	107.41	1255.76	219.198	55.4347	1760.8	1250.7	468.462	134.534	332.154	102.501	373.939	292.477	258.423	294.387	0.779414	178.402	162.339	1.09895	0.431004	295.538	157.311	1.87869	0.358678	132.933	193.041	0.688628	0.263132
O55028	BCKDK	0.493616	-0.0341902	-0.137216	-0.510298	0.0804787	447.676	534.804	567.332	488.805	453.851	454.83	137.525	58.8356	121.26	105.898	598.319	743.699	142.089	89.0506	128.771	291.556	241.378	1324.09	432.843	204.562	1703.51	1416.6	31.3479	161.007	25.5424	155.444	22.8605	208.015	145.584	93.3367	0.749163	191.555	231.395	0.827828	0.61917	60.993	96.3134	0.633277	0.192799	174.548	108.159	1.61381	0.254599
Q9CPT0	BCL2L14	-0.000125311	0.186325	-0.0111127	-0.16084								446.469	39.0334	186.186	354.384	155.94	364.137	195.403	243.247	54.4007	460.658	230.602	126.006	396.068	54.7614	54.2319	140.944	31.4622	162.582	22.6797	319.92	20.6796	80.2666	359.907	144.727	0.17152	422.345	356.791	1.18373	0.819553	35.5141	38.8248	0.914728	0.971386	193.124	194.459	0.993134	0.553863
Q08ED0	BCL2L15	-0.15875	-0.043848	-0.284051	0.438846								42.4808	38.4883	554.658	41.1793	301.127	364.763	752.921	774.21	22.134	17.3208	503.652	8.29573	29.5117	23.4494	61.3596	101.964	13.9636	594.748	16.3397	21.5915	16.474	1032.65	18.126	500.473	0.661055	25.9759	30.7608	0.844446	0.320188	17.5239	26.0924	0.671607	0.289204	551.019	675.868	0.815277	0.471921
Q8K019	BCLAF1	-0.45164	-0.493277	-0.26383	-0.00178255	-0.124039	470.918	432.709	470.159	528.966	572.996	455.859	73.0942	424.715	185.389	229.411	55.1124	50.6075	178.546	174.614	277.307	182.919	123.877	125.086	120.016	298.374	109.371	120.147	246.923	90.7846	476.825	268.785	382.38	90.4836	114.93	231.025	0.214095	123.648	206.071	0.600027	0.22262	302.203	399.971	0.755562	0.149001	133.35	194.728	0.684801	0.920392
Q6PAJ1	BCR	-0.000520878	-0.0135607	-0.0907707	0.0040623	0.0851195	490.512	507.698	532.776	481.425	497.907	445.198	245.757	203.684	177.966	238.683	138.874	177.886	210.052	217.781	209.363	265.469	265.068	100.708	332.852	231.362	146.732	122.592	123.715	186.47	118.222	207.396	117.876	229.465	218.799	209.427	0.716214	243.342	259.644	0.937214	0.492383	150.318	184.423	0.815072	0.934369	209.835	212.42	0.987828	0.872852
Q9CZP5	BCS1L	-0.000215832	-0.0172662	0.053907	0.0288048	0.0181369	474.001	563.472	468.965	506.183	460.121	470.343	161.812	75.2463	222.978	146.065	326.36	214.862	252.698	310.999	159.441	249.115	291.316	249.58	272.485	164.261	212.064	163.819	123.296	163.803	118.699	229.13	131.757	100.549	184.279	122.307	0.721689	198.402	215.894	0.918981	0.554599	138.165	119.402	1.15713	0.970718	226.032	228.668	0.988476	0.712337
Q80XN0	BDH1	-0.143335	0.439152	-0.025195	0.803616	-0.0178849	492.254	481.319	468.485	493.763	465.237	540.283	266.284	35.7378	148.604	195.723	587.743	348.374	199.474	164.308	34.0322	306.946	120.741	460.094	251.278	40.4604	327.642	351.095	29.6893	231.958	32.9146	242.848	38.5527	492.666	299.983	273.056	0.051119	291.071	229.95	1.2658	0.537257	34.0914	36.3709	0.937326	0.384436	167.101	212.279	0.787177	0.0422524
P28653	BGN	-0.027826	-0.0553108	-0.00128687	0.0271215	-0.273147	414.657	346.5	494.267	499.682	696.101	459.724	228.679	173.676	266.037	264.067	159.204	184.932	311.093	257.996	135.548	150.087	253.616	470.91	155.162	106.03	334.174	278.363	110.971	196.139	120.102	217.291	144.745	283.373	175.842	210.197	0.526852	184.869	212.173	0.871313	0.909296	130.421	133.269	0.978631	0.593006	238.597	259.762	0.918522	0.7271
O08539	BIN1	-0.00671347	0.15318	-0.367112	-0.0167792	-0.0162103	477.112	514.038	453.512	492.781	496.212	504.171	86.4382	491.525	61.1613	106.464	62.1263	52.2259	60.539	47.4105	405.009	128.728	53.131	218.828	103.29	448.797	172.031	166.968	392.621	52.1214	465.748	101.506	414.772	61.6595	193.232	64.7253	0.406533	136.133	103.753	1.31208	0.0191831	404.134	468.69	0.862263	0.748176	55.4712	57.5583	0.963741	0.817224
S4R270	BIN2	-0.25696	3.85e-05	-0.196988	-0.0406208	-0.163019	420.797	535.606	268.685	657.471	284.637	711.954	91.7013	834.466	113.244	41.7265	553.354	760.524	124.806	104.075	483.13	22.134	49.1631	150.283	21.9205	521.44	134.186	124.426	460.676	79.7265	528.765	126.378	510.156	82.5132	77.5352	99.1569	0.991328	63.7902	63.3417	1.00708	0.29768	484.654	628.224	0.771467	0.259067	80.7113	109.346	0.738127	0.778977
O88738	BIRC6	0.0740556	0.123447	0.102161	0.164987	-0.0108649	446.53	508.312	476.936	485.979	432.25	578.334	201.864	167.277	220.227	147.812	167.376	187.895	208.477	219.945	182.398	197.962	235.51	178.654	194.927	175.328	144.821	146.801	241.792	288.505	237.296	217.4	254.181	237.952	262.679	238.28	0.309167	220.835	186.713	1.18275	0.353591	226.124	193.3	1.16981	0.341545	248.081	222.234	1.1163	0.262885
Q8R016	BLMH	0.0708417	-0.244608	-0.00464318	0.00013088	0.131803	508.621	503.819	521.845	453.963	484.043	487.56	103.904	151.562	137.231	182.731	163.251	197.297	126.697	198.364	176.353	173.481	240.058	353.356	241.031	184.615	392.632	461.924	148.046	174.462	147.599	188.068	145.384	546.186	192.186	143.625	0.228718	156.524	203.943	0.767489	0.776886	156.594	161.259	0.971073	0.500096	183.917	156.229	1.17723	0.980016
Q5U5M8	BLOC1S3	-0.269248	0.101324	0.0250418	-0.00790695								244.376	248.049	253.468	177.297	210.601	186.044	274.015	250.519	346.653	224.18	174.504	128.166	184.497	342.147	104.419	126.669	315.195	164.915	370.243	189.975	373.216	46.3051	169.352	234.959	0.327986	212.636	183.923	1.15611	0.586181	345.021	320.146	1.0777	0.176358	197.629	253.164	0.780634	0.854019
Q9CY64	BLVRA	-0.0905021	0.073915	0.0687242	-0.0986337	-0.0992738	499.072	466.105	451.759	519.221	494.521	509.135	154.457	255.376	163.624	152.766	206.819	203.153	168.458	181.068	270.979	155.524	172.573	92.0786	141.649	239.637	148.642	166.515	335.513	171.518	354.672	161.757	361.968	123.534	202.011	228.314	0.359906	170.664	152.057	1.12237	0.43244	322.82	283.228	1.13979	0.327439	169.238	192.613	0.878642	0.463189
Q923D2	BLVRB	0.016088	0.0190683	0.241851	0.00444722	-0.0356785	486.203	557.026	345.197	582.972	423.577	528.427	82.32	250.135	79.8465	80.7933	608.925	743.062	72.9751	87.9838	361.434	72.2325	107.093	236.206	78.3928	286.623	252.616	422.067	339.492	98.4965	331.088	75.0623	341.193	660.484	92.0134	106.862	0.552192	82.1886	78.0828	1.05258	0.12132	347.373	289.282	1.20081	0.668251	95.1452	89.2735	1.06577	0.888666
Q91Z96	BMP2K	0.00316786	-0.0440441	-0.00513582	0.0609674								91.438	203.401	160.05	127.572	147.905	130.501	173.337	182.767	629.077	183.204	220.474	117.17	131.939	719.984	139.438	135.43	240.518	118.461	306.227	313.814	273.721	200.702	203.117	124.798	0.680105	159.253	191.108	0.833313	0.893465	381.105	409.87	0.929819	0.871992	166.328	160.301	1.0376	0.496338
Q9D8S9	BOLA1	-0.645141	0.214307	0.00566683	0.260535	0.000972048	483.869	507.114	491.445	470.091	548.622	446.817	240.675	188.662	171.551	189.945	504.623	499.468	200.132	185.643	109.517	249.955	141.615	455.931	240.857	154.23	382.85	398.066	254.824	145.182	232.659	174.188	243.75	803.459	241.693	211.113	0.166844	244.108	201.664	1.21047	0.848357	202.697	191.85	1.05654	0.0202673	152.783	198.963	0.767896	0.273162
P97452	BOP1	0.389084	-0.0132716	-0.392605	-0.179866	-0.0379957	461.479	537.499	396.197	555.22	419.958	551.135	188.515	290.399	196.626	157.009	77.45	84.3607	175.175	156.642	204.215	119.102	207.159	698.216	214.713	336.935	1283.87	934.134	243.866	257.481	254.893	179.765	233.59	676.233	208.036	173.909	0.729591	171.884	183.829	0.935021	0.0880682	227.224	294.076	0.772671	0.098694	220.422	168.575	1.30756	0.536531
P15327	BPGM	-0.61747	-0.219696	-0.0110977	-0.185053	-0.00954645	485.27	563.609	373.662	616.856	397.57	490.093	38.891	429.096	65.5557	81.8326	1241.86	1308.78	58.0236	93.2554	246.479	47.3584	29.3917	1242.84	31.9941	182.016	946.023	1877.68	330.416	26.4545	304.865	62.9259	272.347	586.66	39.174	58.064	0.359833	41.8078	58.9175	0.709599	0.791243	283.081	305.326	0.927145	0.163868	40.4673	69.781	0.579918	0.369628
Q8R164	BPHL	0.164822	-0.0569776	-0.10105	-0.289132	-0.178896	480.557	419.458	473.566	516.356	561.328	482.852	225.086	96.1511	163.64	291.565	515.17	597.645	186.78	194.298	149.852	686.165	465.761	2224.11	887.875	210.207	2854.86	1988.01	67.4454	159.973	74.459	294.875	68.8658	392.315	241.659	159.381	0.690865	384.303	491.438	0.781997	0.568706	95.3877	126.939	0.751446	0.499363	263.125	180.153	1.46056	0.433665
A0A1B0GRV0	BPNT1	-0.343406	-0.206867	-0.136551	0.42894	-0.00102272	458.87	548.636	447.16	497.161	417.26	562.208	164.422	89.5399	226.312	235.024	180.96	217.506	302.359	447.688	66.9632	207.555	307.275	111.935	243.842	64.7199	119.148	78.4556	62.7289	301.637	77.0653	182.761	67.7358	597.455	173.899	363.416	0.179632	181.959	220.542	0.825051	0.252728	65.8093	77.1084	0.853465	0.148647	278.408	371.155	0.750113	0.407725
Q9Z0S1	BPNT1	-0.332632	-0.194473	-0.131596	0.430683								165.685	91.2642	224.63	232.292	187.578	223.055	301.16	441.236	67.3223	207.386	308.389	108.637	242.778	64.5748	115.577	76.4682	62.9508	303.16	77.0693	182.531	68.0218	591.657	173.753	363.27	0.185896	182.275	219.2	0.831544	0.271054	66.0983	77.6361	0.851386	0.149512	278.726	368.555	0.756267	0.404912
A2A654	BPTF	0.123006	-0.00847618	-0.588035	-0.0209495								20.2245	440.884	96.8867	65.6035	10.776	25.928	72.9533	89.5592	312.218	135.586	151.946	109.401	112.049	382.962	107.129	189.185	279.398	117.55	369.916	137.738	321.315	154.014	133.569	134.163	0.854552	96.46	105.13	0.91753	0.0302188	304.311	397.921	0.764752	0.39445	122.127	98.8918	1.23496	0.812967
P28028	BRAF	-0.225975	-0.746708	-0.0207567	-0.512711	0.0730443	432.277	574.751	544.708	444.729	461.367	485.428	118.741	278.477	160.805	324.774	90.1322	109.899	157.355	272.525	308.976	206.237	280.464	170.736	271.871	274.882	191.64	235.355	253.204	122.393	375.943	190.344	304.974	53.7776	145.973	378.627	0.0981693	156.984	262.33	0.598422	0.619638	289.052	309.767	0.933125	0.367951	187.888	269.502	0.697165	0.216235
Q99MP8	BRAP	-0.031912	0.685238	-0.112297	0.0685634	0.00307996	525.049	448.802	518.817	485.079	495.509	485.969	250.128	259.923	140.624	147.339	282.803	257.974	123.668	132.872	228.097	171.355	70.2085	301.966	127.065	258.65	276.274	237.374	224.73	126.659	226.431	161.491	222.008	254.752	266.566	118.812	0.0910855	229.35	145.298	1.57848	0.163353	224.945	248.335	0.905814	0.619379	112.497	125.117	0.899135	0.273207
Q7JJ13	BRD2	-0.0913739	0.433183	-0.000820106	-5.56e-05	-0.0056145	515.976	454.199	485.506	519.748	535.251	440.858	169.827	323.592	81.3628	86.0039	94.4322	86.6609	104.226	89.4874	392.666	82.09	66.0907	118.995	51.0233	318.875	107.548	117.031	283.158	139.451	345.911	117.261	299.087	96.6737	147.973	161.836	0.217153	133.296	84.7627	1.57258	0.90899	324.97	329.459	0.986376	0.506697	95.6349	118.516	0.806934	0.976112
Q8K2F0	BRD3	0.0249852	4.78e-05	-0.0416853	0.0415466	-0.00109618	562.397	439.014	470.195	512.346	522.514	457.266	147.912	271.825	106.55	147.903	155.628	152.013	108.957	137.948	285.054	162.487	130.418	92.8589	127.731	260.58	78.6124	96.6285	169.745	220.088	165.728	225.149	155.228	126.038	192.635	161.729	0.983129	167.678	166.928	1.0045	0.610695	203.342	232.711	0.873796	0.700414	152.352	136.211	1.1185	0.611728
Q3UH70	BRD4	0.00128263	0.0139582	-0.121976	0.146928	-0.0430167	523.825	460.236	442.015	531.238	495.809	493.105	155.67	461.763	232.569	150.962	123.07	129.048	226.527	174.352	300.533	125.509	99.0619	44.2974	76.8841	272.339	39.2996	28.3849	245.11	239.945	231.63	212.177	214.979	114.945	199.87	155.51	0.778867	160.35	146.674	1.09324	0.442465	253.54	321.911	0.787611	0.926798	190.525	185.463	1.02729	0.522419
Q8BXV2	BRI3BP	-0.0462434	0.123792	-0.758886	0.0151642	0.0621549	531.582	437.165	600.011	442.93	530.598	433.583	405.981	752.245	471.426	223.368	1243.41	1460.04	528.084	563.45	113.056	92.8282	201.48	1004.07	110.631	243.548	775.947	691.684	179.765	326.258	153.525	127.063	111.456	947.355	158.599	123.132	0.57298	219.136	153.687	1.42586	0.313724	134.759	383.106	0.351753	0.685299	333.055	404.888	0.822584	0.757944
Q91VR8	BRK1	0.357513	-0.0286147	0.256277	0.119005	0.244424	493.947	587.436	535.166	412.173	416.385	519.155	182.373	147.975	252.826	184.859	135.253	149.705	203.852	232.835	226.737	154.632	239.794	79.2199	200.557	174.922	86.9552	79.1563	254.637	267.479	237.628	172.913	233.095	196.104	189.032	186.424	0.464592	175.346	186.11	0.942165	0.185341	238.156	186.842	1.27464	0.0566234	253.366	207.704	1.21984	0.484887
P18572	BSG	-0.459366	-0.449816	8.26e-06	-0.125594	-0.0487405	459.815	557.853	367.106	523.81	464.73	546.838	235.707	86.2936	184.076	809.066	343.553	337.181	163.483	337.305	60.2213	225.739	157.943	747.01	281.696	78.5147	715.123	655.288	100.848	163.292	131.314	240.708	135.707	169.892	208.634	298.162	0.351498	223.36	443.823	0.503263	0.994042	98.9255	98.7075	1.00221	0.201826	168.437	266.317	0.632468	0.516735
A0A0R4J190	BST1	-0.0100143	0.000933123	-0.183382	0.00868525								28.8512	431.972	38.1189	20.1944	51.7437	37.8364	55.9579	111.093	396.545	39.9412	203.735	154.904	53.9516	431.04	142.866	109.857	322.856	108.427	450.514	54.1055	409.697	109.876	62.83	222.111	0.944213	43.8741	42.7505	1.02628	0.144492	376.366	437.842	0.859594	0.859122	116.76	129.721	0.90009	0.85048
E9QAE3	BTAF1	0.0150934	0.00209915	-0.000272303	-0.000676052	0.000975176	336.382	575.602	557.686	483.656	519.944	439.039	164.428	216.477	213.849	150.842	116.269	96.8408	200.116	211.419	281.661	203.215	208.509	127.239	210.646	306.531	104.173	111.94	223.081	188.884	196.511	127.461	207.707	64.2342	135.44	174.431	0.889077	167.694	162.983	1.02891	0.956943	237.483	239.84	0.990174	0.565281	203.747	195.322	1.04313	0.937778
P35991	BTK	-0.0753599	0.123642	-0.439536	0.0159859								33.0983	653.095	55.3785	44.689	65.0527	51.9254	42.7759	34.2826	538.074	8.69539	26.0864	84.0419	13.287	570.218	48.0824	55.5355	453.178	33.5099	655.263	14.4984	528.124	23.4593	64.1571	62.4488	0.594723	35.3169	24.1581	1.46191	0.036674	506.459	626.192	0.808792	0.536927	38.3249	46.5024	0.824149	0.782053
Q7TST0	BTNL1	-1.06135	0.0193492	-0.32534	0.0872011								230.648	34.544	519.407	122.371	367.601	295.751	942.819	925.01	5.29463	71.5706	390.443	37.9743	165.599	1.56846	30.5958	27.6351	6.45598	429.77	6.19203	111.882	7.06158	115.606	146.436	603.639	0.76478	149.552	133.284	1.12205	0.526899	6.27073	14.1015	0.444686	0.0629162	446.54	823.823	0.542034	0.69784
A2CG22	BTNL6	-0.39264	0.0330222	-0.0420151	-0.16736								218.28	81.349	259.206	132.829	277.525	213.182	327.196	309.306	55.9045	63.7087	281.722	376.91	134.359	19.8253	539.593	617.558	17.8215	230.334	19.0997	101.649	21.593	346.845	146.471	307.15	0.703467	142.82	122.946	1.16165	0.749488	31.773	40.0913	0.792515	0.0447605	257.087	314.551	0.817314	0.426868
Q9WVA3	BUB3	0.0157125	-0.0548701	0.00043596	0.0178769								95.6649	261.121	210.127	163.254	107.496	67.7868	188.242	181.021	437.797	270.564	253.806	45.6268	194.612	383.071	66.5199	48.5678	253.58	163.549	354.065	205.376	320.272	50.4885	99.1373	218.84	0.632054	155.122	187.747	0.826228	0.949123	337.216	332.752	1.01341	0.679143	209.161	196.034	1.06696	0.76672
A0A087WQS2	BZW1	0.0857696	0.0542156	-0.000896483	-0.189332	0.423033	478.41	627.005	581.511	426.028	410.176	447.021	125.004	309.436	190.111	123.557	108.444	101.077	156.72	155.287	144.747	237.13	281.332	62.0982	182.985	172.643	109.082	93.5994	345	147.56	367.173	133.038	339.28	69.7643	150.735	202.147	0.570553	170.956	146.527	1.16673	0.942361	276.343	283.084	0.976187	0.478253	206.334	171.385	1.20392	0.275376
Q9JJ06	C1GALT1	0.773215	0.103321	-0.352645	0.311898								320.994	187.115	163.747	368.674	125.004	81.0874	102.697	139.971	63.4044	671.27	181.042	1036.52	615.455	53.1422	213.678	349.659	30.4842	152.568	30.4648	300.536	39.8565	189.541	625.629	102.445	0.48918	539.298	428.222	1.25939	0.450153	44.5817	90.2406	0.494032	0.0341488	165.786	115.038	1.44114	0.510465
Q9JMG2	C1GALT1C1	0.112936	-0.0629742	0.0297678	0.259371								269.598	52.2827	219.62	559.578	77.1094	82.2033	169.767	214.448	1.19594	562.787	230.348	84.6405	552.502	1.10717	39.7217	33.299	71.2467	213.771	78.897	255.767	89.7611	57.8014	296.538	206.569	0.592412	376.307	455.949	0.825328	0.792129	54.0679	44.0956	1.22615	0.212667	221.246	196.928	1.12349	0.303021
Q8R5L1	C1QBP	0.124911	-0.05389	-0.0042244	2.11e-05	-0.000296889	493.169	487.839	489.876	470.489	518.233	488.44	126.868	148.298	147.181	146.449	544.837	661.522	147.596	123.436	84.1197	104.143	133.397	910.992	161.761	114.358	838.824	894.114	154.752	187.742	137.963	188.814	146.043	945.549	200.492	127.459	0.544199	143.834	165.674	0.868175	0.844852	128.305	133.54	0.960798	0.290923	156.107	132.83	1.17523	0.98837
Q80X80	C2CD2L	0.00113842	-0.0293716	-0.0497721	-0.00956327	3.02e-05	484.635	516.395	472.716	458.289	509.903	503.138	263.561	156.034	293.002	303.398	179.03	131.338	316.235	230.012	234.032	212.337	212.095	141.637	197.123	269.632	135.533	154.237	101.22	233.868	90.3339	331.736	85.8086	72.8873	279.635	177.083	0.615887	251.844	277.419	0.907813	0.676595	140.353	172	0.816009	0.918544	246.322	241.11	1.02161	0.798073
A0A0N4SW93	C2CD5	0.0630516	0.0472329	-0.0884348	0.00782202	-0.000790759	457.012	526.391	478.586	488.443	501.219	484.722	244.173	260.018	205.028	203.664	165.311	184.283	230.802	216.487	343.076	414.83	354.699	334.782	350.043	432.828	403.006	266.252	148.565	158.961	132.372	128.126	140.161	416.742	161.468	150.559	0.665458	273.49	227.278	1.20333	0.589495	210.601	275.073	0.765618	0.578886	239.562	199.283	1.20212	0.839859
P01027	C3	-0.00756923	-0.147352	-0.00792066	-0.106161	0.118921	525.464	637.334	456.13	588.173	361.988	393.319	111.944	286.33	196.323	168.474	754.365	728.49	150.468	171.923	200.508	108.946	124.05	523.979	99.3769	171.72	583.444	886.622	220.663	121.797	244.38	121.337	247.123	577.675	92.1858	142.937	0.339357	104.359	129.729	0.804434	0.775883	222.764	234.143	0.951402	0.789261	147.39	155.109	0.950234	0.36773
P01029	C4B	0.87073	0.327351	0.0824731	0.0643068	0.577122	542.283	572.115	557.674	482.312	416.539	411.454	134.621	262.695	172.816	105.998	1017.6	869.891	114.006	95.7758	257.076	157.657	203.484	576.921	114.676	248.28	455.289	516.156	312.804	145.659	283.023	125.735	306.6	608.551	130.859	123.438	0.0734383	141.046	115.47	1.2215	0.263991	292.16	264.666	1.10388	0.0452026	173.986	111.073	1.56641	0.564263
E9Q5L4	C530008M17RIK	-0.718909	-0.000159883	-0.252029	1.20016	0.000351344	549.948	421.67	517.608	441.036	498.296	537.47	263.271	129.58	144.712	231.363	179.948	81.8738	337.355	332.856	51.7721	221.361	228.62	221.111	325.527	78.6115	135.209	117.721	102.75	321.933	116.609	499.045	86.2028	331.713	559.436	463.792	0.977675	348.023	351.978	0.988762	0.261111	80.2417	108.267	0.741147	0.0958107	231.755	378.001	0.613106	0.0866864
D3YXF5	C7	0.235314	-0.0679722	-0.352253	-0.229294								123.937	237.08	166.566	141.345	844.057	749.788	133.885	140.791	123.568	212.6	202.252	524.147	189.029	176.659	668.924	985.895	133.311	270.177	158.372	268.322	164.893	442.994	168.241	209.586	0.529526	168.259	199.565	0.843128	0.158166	140.591	190.704	0.737223	0.258069	212.998	161.421	1.31952	0.274905
Q8K182	C8A	0.242167	0.523853	0.290834	0.0574758								172.117	177.655	191.757	149.041	972.725	778.533	137.526	170.49	131.584	232.066	178.335	782.481	119.906	104.834	498.529	710.323	216.573	168.354	149.941	125.555	265.51	543.415	163.475	149.88	0.100501	189.22	131.501	1.43893	0.265509	204.556	144.143	1.41911	0.0920734	179.482	152.632	1.17591	0.532319
Q8BH35	C8B	-0.316725	0.151284	-0.0191126	0.0447373								323.298	293.061	352.768	332.504	1818.28	1559.8	274.484	294.319	155.888	293.24	184.825	446.064	73.1064	104.922	281.247	416.757	199.468	80.0485	387.258	118.53	339.38	613.302	129.326	375.405	0.50438	248.621	174.714	1.42302	0.779504	231.579	261.747	0.884742	0.303919	205.88	314.736	0.654137	0.745019
Q8VCG4	C8G	0.556622	0.297374	0.322967	0.813924								140.157	153.564	185.774	109.833	1137.95	923.98	120.33	133.924	157.963	209.036	229.316	910.457	147.039	134.403	489.637	672.05	158.464	146.97	102.012	135.138	182.049	1420.87	164.499	119.432	0.172797	171.231	130.67	1.31041	0.122461	166.159	129.993	1.27821	0.11345	187.353	124.562	1.5041	0.0778581
P13634	CA1	0.532242	0.0667557	0.647618	-0.0021644	-0.189995	481.124	390.6	425.73	644.526	572.433	406.749	713.482	27.8837	33.8272	666.336	223.284	259.328	20.5797	18.0306	56.6434	592.265	20.5828	102.862	675.002	21.6245	125.657	130.134	34.4079	22.532	22.5919	471.671	32.7506	169.581	733.816	10.5103	0.404603	679.854	604.336	1.12496	0.147801	41.2673	24.0334	1.71708	0.150637	25.6473	16.3735	1.56639	0.913911
Q9D6N1	CA13	-0.227748	-0.000429719	0.000141776	-0.699192								151.216	65.7617	356.617	136.993	112.069	163.821	498.428	666.055	21.6159	264.082	601.459	5.17999	266.286	13.6484	114.788	137.833	58.2714	325.623	61.0425	135.905	62.2017	100.299	114.404	526.144	0.962076	176.568	179.728	0.982417	0.980657	47.363	46.8175	1.01165	0.267111	427.899	563.542	0.759303	0.179318
P00920	CA2	1.58655	-0.135618	0.207586	-0.0415351	0.00168333	473.549	503.622	502.604	499.534	504.574	459.941	297.754	168.24	30.7149	315.253	946.616	1149.41	23.0519	20.5587	146.86	183.167	32.1691	748.524	308.039	99.3231	609.553	1144.41	226.08	31.6487	113.854	316.198	133.857	862.397	300.959	20.8706	0.307681	260.627	313.163	0.832238	0.311704	168.932	127.139	1.32872	0.00133501	31.5109	21.4937	1.46605	0.592925
P16015	CA3	1.07079	-0.482797	0.0285698	0.226319								309.431	93.9666	378.277	352.488	168.766	171.538	86.6627	63.3292	85.095	252.981	112.468	200.637	402.906	58.8888	274.215	75.1931	63.1881	166.608	87.7233	830.813	120.637	417.602	326.85	68.3227	0.264077	296.421	528.736	0.560622	0.664022	89.6401	80.1929	1.11781	0.212156	219.118	72.7715	3.01103	0.416663
Q64444	CA4	0.349418	-0.0637584	-0.0201319	0.274315	0.00515207	501.273	473.033	522.734	559.5	421.805	471.822	388.035	50.2673	125.343	333.667	197.539	231.298	117.713	83.3919	11.9078	373.566	135.134	97.9336	739.188	11.6647	119.133	132.159	34.5704	214.806	23.1884	735.791	27.4705	567.773	731.705	127.395	0.58793	497.769	602.882	0.825649	0.795824	24.6496	28.3734	0.868756	0.220952	158.428	109.5	1.44683	0.471015
P28651	CA8	0.5562	-4.73e-05	-0.489736	-0.251189	-0.155166	562.766	319.838	435.421	631.884	536.52	457.279	291.933	130.103	157.618	206.783	681.093	944.082	120.609	92.8049	7.80697	492.474	328.747	256.192	600.245	42.0257	345.543	490.318	49.667	357.121	36.5995	629.697	40.9704	193.408	643.744	263.427	0.987466	476.05	478.909	0.994031	0.353441	32.8148	69.5762	0.471638	0.210893	281.162	158.947	1.76891	0.413319
Q06138	CAB39	-0.0914927	0.00490596	0.196455	0.00222841	0.160739	495.33	580.737	544.105	404.777	375.649	563.823	194.443	119.64	191.95	183.219	263.577	273.014	200.07	245.22	217.548	194.607	181.828	50.2245	132.777	140.607	80.3979	69.7354	207.856	315.72	248.304	186.234	241.659	132.659	133.066	413.65	0.817391	174.039	167.41	1.0396	0.314855	222.354	169.517	1.31169	0.514506	229.832	286.313	0.802731	0.935835
Q9DB16	CAB39L	-0.0255399	-0.226235	0.00572268	-0.115865	0.236076	513.211	511.232	546.627	435.36	485.39	475.002	195.649	134.624	192.972	272.504	248.343	238.291	220.146	318.633	140.71	230.363	280.04	97.4275	206.282	138.256	180.549	152.431	170.536	332.671	198.632	252.41	179.985	93.0386	172.867	348.278	0.163846	199.627	243.732	0.819042	0.800175	163.744	157.171	1.04182	0.65466	268.561	295.686	0.908264	0.496089
O08532	CACNA2D1	0.555243	-0.206839	0.0692995	-0.0644089								249.4	87.9228	165.83	221.499	637.966	670.959	161.324	111.36	163.993	230.987	297.284	406.932	293.624	115.06	646.654	548.101	83.2914	198.801	83.591	297.782	95.8614	603.12	183.881	137.516	0.194984	221.423	270.968	0.817153	0.541219	114.382	95.5247	1.19741	0.156917	220.638	136.733	1.61364	0.436682
Q9CXW3	CACYBP	0.579158	0.00481468	-0.00706023	0.32639	0.00725917	491.756	480.776	521.685	501.402	509.776	445.88	137.994	202.179	216.985	136.245	96.1277	80.1001	204.123	166.471	220.459	156.49	228.151	57.2563	130.202	242.186	25.3121	39.8462	184.693	315.203	162.179	174.965	175.806	67.1275	161.074	140.263	0.783794	151.853	147.138	1.03205	0.769926	193.653	202.181	0.957818	0.0978432	253.446	170.286	1.48836	0.2871
B2RQC6	CAD	0.0109161	0.134395	0.0321318	0.573013	-0.0946568	474.212	476.657	469.813	524.979	500.58	488.889	176.728	243.295	223.709	154.926	108.18	121.354	202.456	222.138	201.701	105.983	303.814	240.944	87.0533	186.46	85.4354	84.8603	287.03	138.187	265.397	149.262	272.349	160.21	216.482	195.531	0.414665	166.398	130.414	1.27592	0.567791	253.693	231.718	1.09484	0.782228	221.904	206.708	1.07351	0.193924
E9PYN1	CADM1	-0.394181	-0.447111	0.0477024	-0.233774	0.0611891	501.98	477.777	559.034	447.875	457.517	516.09	247.937	301.687	217.594	227.3	492.137	1116.42	307.74	247.615	242.698	165.618	191.143	160.626	466.531	289.466	280.255	207.735	522.794	268.64	443.612	316.315	436.293	257.524	224.916	429.534	0.211093	212.824	336.715	0.632058	0.601212	400.595	344.922	1.16141	0.186225	225.793	328.296	0.68777	0.517714
K4DI58	CADM3	0.0351849	-1.52741	-0.0600604	0.00749661	-0.00283854	482.078	501.509	477.054	517.113	501.007	463.16	225.922	132.91	261.024	366.177	180.433	123.152	232.058	188.726	158.286	293.425	303.034	188.161	585.293	168.7	164.593	91.1827	92.757	191.083	129.237	491.464	126.494	41.1166	167.602	261.82	0.0374531	228.983	480.978	0.476078	0.48397	125.846	143.616	0.876267	0.573465	251.714	227.534	1.10627	0.857971
Q08331	CALB2	-0.118789	-0.183116	0.0376572	0.0366398	-0.0112782	467.723	524.126	452.453	496.183	519.8	475.735	459.53	17.3787	229.628	733.755	129.491	145.222	200.132	188.311	12.5153	375.539	158.71	49.0719	466.669	16.0442	32.6435	23.6633	30.0487	134.32	49.0707	477.362	58.22	69.6321	480.853	239.764	0.300286	438.641	559.262	0.78432	0.740727	33.5947	27.4979	1.22172	0.356754	174.219	209.402	0.831984	0.755205
Q8VCQ8	CALD1	-0.0209267	-0.327836	-0.278585	-0.0206755								246.398	121.472	207.896	422.258	88.698	96.475	246.287	233.671	70.4297	379.3	388.201	27.0131	387.85	64.1382	56.8407	45.6588	64.8736	109.022	127.63	294.963	87.4736	60.4088	135.568	314.569	0.245618	253.755	368.357	0.688885	0.271261	74.259	104.413	0.711203	0.755953	235.04	264.842	0.88747	0.763032
E9QA15	CALD1	-0.0418995	-0.290594	-0.317515	-0.0189645	-0.0279464	467.695	602.089	313.303	584.838	404.995	542.609	247.528	118.239	206.111	443.356	87.261	97.665	244.255	235.49	73.4252	389.689	357.047	36.5046	380.104	69.2155	60.8234	54.512	63.2247	107.254	123.193	298.979	85.2416	68.3585	163.065	305.94	0.253858	266.76	374.146	0.712985	0.221771	73.9638	103.549	0.714286	0.656076	223.471	261.895	0.853284	0.745703
Q3UKW2	CALM1	0.00268215	-4.62463	-0.066522	-0.202372	0.09977	344.737	789.565	493.844	408.567	498.042	392.974	110.833	64.9884	295.287	245.213	104.497	112.589	327.706	265.326	111.52	89.4392	221.299	123.807	255.539	169.232	163.6	156.431	120.953	364.521	183.547	297.762	111.58	121.463	48.4131	262.344	0.00178709	82.8951	266.171	0.311435	0.578735	114.684	139.256	0.823551	0.865508	293.702	285.125	1.03008	0.218864
Q91WQ9	CALML4	0.0570091	-0.136379	-0.00433529	0.0467559								176.688	25.3242	290.036	208.394	76.6457	74.4522	421.673	400.716	8.52089	227.687	519.754	2.18666	327.031	1.15336	22.2514	8.76731	9.38149	427.233	12.6696	261.694	18.439	57.6014	252.213	241.402	0.325534	218.863	265.706	0.823701	0.911157	12.1138	13.049	0.928329	0.547114	412.341	354.597	1.16284	0.748332
P14211	CALR	0.486924	0.478449	-0.0397982	0.176849	0.00706966	482.586	558.471	453.381	501.991	445.832	500.392	194.284	193.391	240.468	155.945	106.497	114.51	184.101	234.342	189.301	212.209	245.672	133.684	161.72	191.272	89.9119	103.737	144.166	306.806	139.091	162.952	141	121.222	278.242	166.034	0.11563	228.245	160.206	1.4247	0.525867	158.155	174.584	0.905896	0.0782603	264.315	194.826	1.35667	0.170161
O35887	CALU	-0.00477464	-0.00576818	0.0268313	-0.00130271	-0.0520421	408.669	554.353	423.561	503.527	539.555	484.027	258.992	183.3	100.385	379.71	272.34	314.34	127.737	62.6655	172.224	263.938	96.6851	257.837	210.537	173.848	232.503	173.248	246.401	64.4732	238.907	226.116	229.287	172.793	253.985	84.2669	0.830376	258.972	272.121	0.951678	0.598503	215.971	198.685	1.087	0.855888	87.1811	91.5566	0.95221	0.917227
Q91YS8	CAMK1	0.0682184	0.118409	0.0553747	0.000445175	0.0766997	464.321	532.226	538.994	459.97	474.276	479.641	269.173	102.965	202.11	150.865	402.29	440.945	204.016	112.556	174.912	149.225	140.037	309.296	143.334	186.979	158.625	346.337	146.223	192.445	143.008	232.239	171.744	250.273	233.452	142.048	0.412953	217.283	175.479	1.23823	0.505733	164.293	144.317	1.13842	0.49149	178.197	152.873	1.16565	0.958402
Q8BW96	CAMK1D	0.103032	0.314317	-0.00841201	-0.00891773	0.000684608	449.48	510.742	514.622	482.022	494.754	486.384	308.496	159.009	191.633	207.287	88.3627	75.1282	209.096	166.451	245.317	516.436	299.313	75.0335	363.598	355.181	21.1822	228.829	216.146	280.718	231.831	273.772	237.88	128.38	357.962	269.553	0.225478	394.298	281.552	1.40044	0.812377	233.114	248.673	0.937431	0.399344	257.221	215.033	1.19619	0.876814
Q5SVJ0	CAMK2B	0.0096276	-0.0217495	-0.00451271	0.258906	-0.0349792	467.138	510.893	453.998	510.108	495.434	496.082	185.514	148.926	213.525	144.168	273.644	239.675	242.511	207.575	254.41	188.734	263.939	2497.5	278.988	257.411	620.492	510.493	139.8	207.916	165.63	240.417	150.381	127.934	231.068	207.535	0.685382	201.772	221.191	0.912209	0.863426	181.53	190.656	0.952136	0.689587	228.46	219.207	1.04221	0.576014
A0A0G2JGS4	CAMK2D	-0.174544	-0.15978	-0.127391	-0.0945983	-0.0198732	447.993	548.129	426.721	528.177	491.252	483.375	166.38	162.81	208.781	229.047	231.824	212.962	237.621	306.765	145.165	156.619	236.258	210.459	178.968	155.99	242.395	225.632	137.894	212.515	167.713	205.444	158.839	146.392	200.333	238.42	0.200909	174.444	204.486	0.853084	0.120773	147.299	162.171	0.908296	0.202357	219.185	260.935	0.839995	0.354711
Q923T9	CAMK2G	-0.000885422	-6.8e-05	-0.000112388	-0.110843	-0.000209171	459.089	555.301	448.133	495.389	460.402	515.306	194.953	148.603	222.215	150.665	271.185	237.068	248.496	214.362	225.557	207.517	230.728	460.873	245.007	201.318	466.475	427.57	134.937	207.202	159.501	238.655	145.464	140.979	228.851	204.644	0.977427	210.44	211.442	0.995261	0.974049	168.653	169.807	0.993201	0.88029	220.048	222.501	0.988978	0.50505
P08414	CAMK4	0.806992	-0.0495725	-0.000842735	0.25839	-0.0382473	508.507	539.901	303.083	670.275	270.114	624.158	102.753	599.43	78.5567	80.6656	74.1058	20.4927	71.036	38.2155	413.286	123.609	157.98	1517.9	167.783	340.26	411.865	387.834	525.707	101.401	569.157	135.951	542.921	158.427	106.79	67.5333	0.575239	111.051	128.133	0.866684	0.928046	493.971	502.949	0.982149	0.13699	112.646	58.9282	1.91158	0.58042
Q6ZQ38	CAND1	0.0724276	-0.257051	-0.115224	-0.0897884	-0.00167169	475.368	512.116	472.704	502.775	455.18	520.597	196.64	288.794	214.183	216.733	154.329	170.127	212.467	215.311	214.473	205.872	227.224	162.245	227.34	211.599	229.618	243.112	181.719	224.044	194.651	219.125	190.279	232.45	184.904	205.281	0.0340111	195.805	221.066	0.885732	0.338677	195.49	231.681	0.843789	0.0986168	221.817	211.02	1.05117	0.403226
Q6ZQ73	CAND2	-0.371129	-0.407299	-0.0879336	0.48534								90.0282	146.24	106.486	171.301	1283.38	1130.47	94.9487	131.715	140.315	76.2245	96.3131	1272.64	74.488	135.366	1032.15	896.628	107.827	73.0164	162.082	138.729	145.385	1757.85	77.7368	169.978	0.239518	81.3298	128.173	0.634533	0.310423	131.176	147.896	0.886946	0.195846	91.9386	132.214	0.695379	0.104981
P35564	CANX	0.261498	0.040694	-0.0419333	0.00684511	0.0574293	494.316	499.103	517.118	476.715	499.185	467.047	139.995	220.859	214.371	123.534	144.551	137.698	214.054	238.047	153.83	154.319	324.675	238.585	170.311	149.521	213.082	214.203	155.996	343.255	140.718	138.232	147.036	211.38	178.746	218.442	0.488342	157.687	144.026	1.09485	0.550675	152.287	170.366	0.893885	0.21855	294.1	223.514	1.3158	0.807014
P40124	CAP1	-0.185929	-0.260771	-0.0186467	-0.000231877	-0.00384633	473.461	554.207	419.611	507.658	451.019	527.379	107.724	415.381	179.055	230.1	104.337	113.266	131.742	283.05	388.224	139.075	137.323	55.5416	118.106	310.721	55.7581	55.6356	305.124	164.044	366.044	177.998	334.596	61.9486	135.193	224.158	0.272683	127.331	175.401	0.725939	0.611877	342.648	364.049	0.941214	0.353232	160.141	212.983	0.751893	0.971251
Q9CYT6	CAP2	-0.178121	-0.603783	0.00550842	0.00135552	0.0042625	485.564	566.471	439.931	486.399	427.971	535.704	188.445	39.5988	208.054	311.23	596.056	389.544	234.25	189.085	61.7727	182.935	190.098	501.236	214.013	57.1077	518.878	468.47	42.267	191.29	52.6651	307.846	51.4678	312.539	179.607	333.26	0.0972108	183.662	277.697	0.661377	0.803816	51.8358	49.7905	1.04108	0.320227	196.481	252.199	0.779071	0.912551
P24452	CAPG	-0.00018527	0.00396589	-0.503822	0.0241935	0.00281843	523.544	427.172	546.485	497.339	523.056	444.094	119.556	731.367	102.959	90.613	140.396	111.911	56.0619	70.6106	294.8	131.331	58.4923	139.424	89.927	379.113	126.574	149.44	285.029	109.281	404.595	217.158	321.94	132.71	168.134	147.302	0.885869	139.674	132.566	1.05362	0.212297	300.59	505.025	0.595198	0.975466	90.2442	91.3249	0.988166	0.533696
O35350	CAPN1	-0.0136175	-0.0410257	-0.0106171	-0.363892	0.00775261	481.622	490.206	516.32	470.756	500.076	489.042	208.574	186.616	188.705	217.799	200.611	238.12	197.86	249.422	159.885	198.798	239.136	191.995	263.321	153.78	219.77	247.37	160.438	223.773	175.473	200.094	177.359	203.747	220.374	236.917	0.448855	209.249	227.072	0.921512	0.623674	165.894	171.956	0.964745	0.64058	217.204	228.066	0.952373	0.0313505
Q3UW68	CAPN13	0.784952	0.414156	0.0029027	0.00844528								553.988	16.0806	283.615	240.207	49.425	67.8175	218.907	224.133	54.6348	498.67	455.878	132.764	541.064	53.7696	158.713	74.1423	15.66	360.302	20.309	247.383	25.1253	144.118	515.711	206.016	0.208636	522.79	342.885	1.52468	0.921559	31.8067	30.0531	1.05835	0.0929574	366.598	216.352	1.69446	0.848112
O08529	CAPN2	0.347007	-0.000244228	0.0325474	0.0674991	0.0294969	517.62	481.039	511.557	458.598	482.451	507.558	215.751	138.326	159.871	215.3	147.387	171.66	141.793	123.328	200.625	222.693	149.48	152.661	230.378	184.191	160.273	133.362	150.802	152.042	158.455	240.985	170.287	243.327	244.776	119.783	0.925384	227.74	228.888	0.994986	0.527881	173.905	160.324	1.08471	0.0470963	153.798	128.302	1.19872	0.499338
O08688	CAPN5	0.100943	0.0470988	0.229188	0.000479493	0.00700258	479.591	491.657	516.844	479.305	506.94	473.248	629.036	166.873	193.434	449.383	540.371	614.58	172.376	118.078	300.441	258.971	174.336	301.304	347.847	197.99	324.053	279.726	214.516	350.12	185.28	476.249	194.852	398.321	599.608	272.915	0.616522	495.871	424.493	1.16815	0.237997	236.603	183.381	1.29023	0.514437	239.297	187.789	1.27428	0.957457
O88456	CAPNS1	-0.0526448	0.546766	0.00121978	-0.00811082	-0.000537696	443.949	642.181	361.758	496.519	352.202	622.788	586.664	245.653	155.707	324.378	414.137	525.039	175.566	135.666	186.421	362.123	209.592	122.51	269.02	171.638	129.129	182.355	215.932	114.139	236.491	187.017	264.05	223.043	326.629	246.52	0.169218	425.139	260.138	1.63428	0.903186	222.134	217.927	1.0193	0.57388	159.813	185.918	0.859589	0.874271
Q60865	CAPRIN1	0.0465416	0.0896809	0.0063411	0.095227	0.0420103	487.066	596.293	452.969	480.1	431.103	500.57	172.373	147.385	228.911	165.567	140.678	164.699	227.075	197.386	304.829	119.693	153.363	69.4395	99.8058	293.008	120.779	77.0852	160.698	306.302	133.219	175.292	148.212	271.455	249.485	175.884	0.49942	180.517	146.888	1.22894	0.860989	204.58	191.204	1.06996	0.581746	229.526	200.115	1.14697	0.585421
Q5RKN9	CAPZA1	-0.679706	-0.0884719	-0.0360586	-0.00592059	0.00443717	446.14	523.755	514.395	487.381	469.383	496.18	148.037	296.645	129.57	236.721	121.577	121.361	130.301	259.855	296.037	115.631	126.565	328.38	115.551	296.234	266.995	286.911	224.186	102.967	240.224	83.2137	248.414	182.071	74.0384	244.308	0.5739	112.569	145.162	0.775472	0.489402	256.212	277.701	0.922619	0.148678	119.701	211.488	0.565992	0.866933
P47754	CAPZA2	-0.527486	-0.350415	-0.00983424	-0.13156	0.0864893	486.996	540.805	501.341	471.912	466.577	484.022	121.095	261.374	115.176	236.06	180.853	203.27	126.931	270.386	289.136	115.412	190.936	235.761	139.578	284.144	236.972	229.818	213.765	104.355	255.97	106.129	266.014	145.083	74.3594	307.63	0.278984	103.622	160.589	0.645264	0.685033	256.305	267.163	0.959357	0.210838	136.822	234.982	0.582267	0.30413
P47757	CAPZB	0.277559	-0.0196298	-0.00636497	0.0116611								193.286	227.558	185.694	136.658	196.459	158.468	203.967	148.34	281.754	140.762	214.018	111.997	181.546	254.296	104.758	99.2548	183.436	225.855	196.424	230.847	182.658	85.6571	172.399	145.312	0.678494	168.816	183.017	0.922404	0.801465	215.949	226.093	0.955136	0.144286	208.522	165.873	1.25712	0.800559
A0A0R4J0W4	CAR12	0.368874	0.169955	-0.00805173	0.201135								423.012	38.3092	204.836	219.175	126.552	158.623	174.838	158.154	65.2529	334.917	244.41	231.739	480.234	70.6982	57.6853	211.145	29.6981	285.731	26.715	367.994	30.2679	239.687	672.662	222.54	0.396045	476.864	355.801	1.34025	0.852535	41.7396	45.2408	0.92261	0.122056	244.992	185.177	1.32301	0.384337
Q9D1I2	CARD19	-0.623858	-1.21339	-0.00689412	0.067977								190.763	183.839	145.696	472.308	189.131	156.152	198.034	202.877	209.511	233.907	154.802	65.4271	303.886	187.652	79.052	65.4964	136.771	179.036	162.779	486.916	165.996	121.093	202.609	236.897	0.0628613	209.093	421.037	0.496614	0.769683	170.759	178.09	0.958838	0.0304717	159.845	212.603	0.751847	0.614155
D3YUP1	CARM1	-0.276064	-0.126818	-0.0362927	-0.159148	0.00117577	473.513	490.056	513.938	492.966	482.17	491.075	118.322	240.439	216.204	264.883	82.0037	103.519	212.271	308.128	235.566	258.92	265.518	178.927	206.567	192.865	203.536	239.984	123.602	203.859	102.312	188.274	100.34	148.688	145.772	478.872	0.418268	174.338	219.908	0.792777	0.685268	153.169	178.539	0.857906	0.310532	228.527	333.09	0.686082	0.415606
D3Z030	CARMIL1	-0.0290014	0.0368058	-0.0199988	-0.201292								219.601	71.0803	300.725	186.241	264.762	231.691	321.729	367.961	67.2745	176.944	212.549	234.601	148.727	68.4934	238.96	347.873	53.2387	461.438	51.3919	215.456	58.2498	119.431	204.306	399.549	0.511627	200.283	183.475	1.09161	0.616697	59.5877	63.6552	0.9361	0.659249	324.904	363.079	0.894856	0.317114
S0DHL8	CARMIL2	0.113674	-0.0750896	-0.00559971	-0.0883084	-0.136541	491.696	441.471	470.872	494.618	504.64	535.297	123.883	481.46	104.963	125.687	127.143	114.925	92.0116	108.228	687.183	120.563	196.273	330.818	135.264	733.997	364.744	296.109	511.592	70.891	414.67	104.535	345.909	139.525	70.0648	83.1051	0.450292	104.837	121.829	0.860529	0.847045	514.895	543.376	0.947585	0.513955	124.042	94.4483	1.31333	0.582904
Q9ER72	CARS	0.127573	0.0504236	0.323527	-0.0270749	0.0910811	515.025	557.752	473.792	497.587	442.608	470.821	196.674	150.835	244.057	213.989	195.542	167.523	220.89	249.633	249.436	216.796	250.851	120.874	190.878	184.767	188.533	166.607	222.343	295.343	167.075	197.362	177.169	164.564	232.274	228.196	0.315524	215.248	200.743	1.07226	0.132427	216.316	167.559	1.29098	0.191286	263.417	232.906	1.131	0.594558
O70589	CASK	-0.0291772	-0.575116	0.0290381	0.0105743	-0.0179649	472.089	533.17	424.212	508.578	461.212	532.455	187.06	64.3392	202.12	323.688	156.912	147.019	263.331	309.492	63.8993	280.751	308.586	134.933	397.098	63.0405	104.132	110.379	75.2263	277.83	73.7973	353.336	74.3186	92.5854	293.497	282.889	0.0694871	253.769	358.041	0.708773	0.457037	71.1481	67.059	1.06098	0.565753	262.845	285.237	0.921497	0.759727
Q8VHK1	CASKIN2	-0.0288091	7.96e-05	0.0104216	0.32315								309.345	207.759	170.721	184.905	434.857	547.335	213.648	190.222	115.359	343.667	175.447	403.591	314.543	74.3167	368.657	462.615	196.39	239.945	189.404	453.504	198.53	1827.95	306.252	231.222	0.980944	319.755	317.65	1.00662	0.810319	170.093	157.16	1.08229	0.563881	195.371	211.697	0.922879	0.457555
P29452	CASP1	0.0197723	-0.00597833	-0.00222823	0.15209								218.337	114.664	227.488	191.717	99.2321	96.0773	290.451	244.643	223.308	154.159	206.751	53.4535	151.545	192.518	41.8803	48.6525	62.8191	386.151	66.7163	310.687	69.8001	94.305	245.975	211.172	0.842774	206.157	217.983	0.945747	0.930346	118.643	124.633	0.951936	0.716598	273.463	248.755	1.09933	0.420669
P70677	CASP3	0.0481137	0.00276533	0.21164	-0.391856	0.0648672	561.296	457.556	542.852	411.525	515.839	490.122	235.839	166.264	259.233	268.647	126.591	158.363	212.601	264.549	181.811	148.603	178.544	247.938	161.763	143.188	254.609	322.178	194.126	322.919	171.939	192.258	178.338	92.0707	260.391	190.155	0.881455	214.944	207.556	1.0356	0.0910864	184.758	160.464	1.1514	0.556409	253.565	222.435	1.13995	0.252653
O08738	CASP6	0.0887937	-0.206337	-0.339902	-0.203675								168.097	148.146	152.312	178.45	150.657	144.828	219.41	257.886	130.761	120.125	266.752	24.7607	224.95	147.796	126.978	96.3888	132.398	343.042	140.344	181.487	125.317	79.1697	185.279	140.39	0.210389	157.834	194.963	0.809559	0.00933461	129.492	145.429	0.890417	0.509407	254.035	205.895	1.23381	0.414357
P97864	CASP7	0.0848005	0.0149235	1.52701	-0.138622								162.741	43.3888	370.079	152.594	97.7093	94.1814	443.158	359.548	79.8492	157.708	471.498	206.66	199.542	59.5006	223.296	172.369	107.612	427.209	48.777	158.814	90.2387	52.5584	224.312	312.115	0.689549	181.587	170.316	1.06617	0.0177867	92.5667	50.5555	1.83099	0.351269	422.929	371.607	1.13811	0.497131
A0A087WQT6	CASP8	0.136934	0.0763212	-0.132955	-0.398989								152.662	221.703	192.72	149.573	66.9401	72.9684	184.813	131.874	216.229	220.24	250.292	108.603	206.142	263.922	112.166	144.091	203.18	301.917	241.518	174.711	229.228	32.1308	240.839	274.856	0.433904	204.58	176.809	1.15707	0.156088	216.212	242.381	0.892035	0.387541	248.31	197.181	1.2593	0.251072
F6QYE1	CASQ2	0.00292833	-0.910569	-0.106694	-0.00451908								21.1177	8.55509	35.0297	54.1895	4613.61	2439.98	20.2093	34.8432	12.9285	32.9567	17.3859	2090.22	48.7123	36.9805	3460.67	2779.31	19.3617	25.8515	18.5078	53.3778	14.8967	1485.64	40.3317	20.1145	0.0559502	31.4687	52.0932	0.604085	0.572636	15.729	21.3478	0.736796	0.890791	26.089	25.0557	1.04124	0.883383
P24270	CAT	-2.48817	-0.0162609	0.0945969	-0.00960459	-0.0459795	468.448	540	387.953	540.605	462.468	525	90.9906	131.639	155.211	112.799	885.083	1013.85	316.289	393.245	177.754	85.8744	168.473	340.861	103.083	125.379	371.365	534.715	154.265	135.901	174.153	119.528	160.162	532.184	135.972	415.287	0.689001	104.279	111.803	0.932702	0.31955	164.06	143.724	1.1415	0.0118336	153.195	374.94	0.408584	0.840197
O54724	CAVIN1	-0.00719068	-0.0584987	0.00121162	-0.150102	0.167671	513.647	518.262	537.46	428.789	501.545	467.107	285.842	78.337	251.437	308.201	399.398	378.66	232.156	178.007	56.4745	260.192	204.998	421.512	248.848	44.1077	529.778	415.894	70.184	158.082	91.159	274.32	92.269	264.486	201.612	233.622	0.414947	249.215	277.123	0.899294	0.924456	72.9758	71.2012	1.02492	0.781401	204.839	214.595	0.954539	0.299969
Q63918	CAVIN2	-0.14921	-0.00527184	0.0923379	-0.279112								201.168	147.86	240.044	278.235	525.307	564.866	217.141	219.874	166.2	224.677	160.64	183.775	186.452	140.923	355.558	356.802	173.063	112.868	171.954	179.558	169.594	108.12	192.399	209.308	0.81526	206.082	214.749	0.959642	0.226832	169.619	153.579	1.10444	0.354999	171.184	215.441	0.794575	0.368777
P22682	CBL	0.10283	0.070387	-0.150332	0.0339998	0.0907452	447.76	561.368	544.831	460.624	452.078	480.16	176.65	282.292	217.379	154.839	108.384	127.12	166.219	145.423	371.111	155.087	154.332	583.911	139.216	521.374	274.352	280.165	252.646	109.13	324.999	108.676	252.78	146.654	125.743	71.2363	0.414227	152.493	134.244	1.13594	0.387103	292.179	376.222	0.776614	0.486561	160.28	127.626	1.25586	0.770031
P48758	CBR1	-0.843216	0.344738	-9.46e-05	-0.2431	-0.05225	481.025	472.938	485.639	500.506	515.9	484.775	392.95	98.7551	126.207	357.737	165.391	182.667	199.909	213.375	87.7051	352.163	101.306	186.141	309.29	82.3443	215.749	231.35	90.8313	124.403	80.829	281.317	82.3942	172.974	471.618	148.344	0.109936	405.577	316.115	1.28301	0.961207	86.9769	87.3095	0.996191	0.0561883	117.305	187.209	0.626601	0.119858
P08074	CBR2	0.0434623	-0.289341	0.643385	0.356013	-4.97e-05	395.091	576.584	486.613	480.971	525.863	456.612	412.439	36.079	78.5488	482.059	349.087	337.407	52.2442	44.4663	62.326	286.047	85.084	586.201	311.64	39.8176	451.323	487.728	58.2371	113.116	53.0162	408.773	111.228	1368.26	143.885	135.683	0.273214	280.791	400.824	0.700533	0.173734	77.2638	42.9709	1.79805	0.672256	92.2496	77.4646	1.19086	0.381945
Q8K354	CBR3	0.290234	1.48687	0.0757359	0.0559449	0.0438584	512.581	486.193	513.838	458.489	489.679	497.391	631.842	63.172	79.4688	239.582	74.8319	90.9976	76.9655	48.2482	107.771	429.532	64.7968	105.856	248.432	104.39	103.246	97.7551	89.86	90.1143	87.1808	300.738	94.6508	162.537	711.518	53.2344	0.0533941	590.964	262.917	2.24772	0.415062	97.4273	84.9142	1.14736	0.182868	78.1266	59.4827	1.31343	0.575562
Q91WT9	CBS	-0.502439	-0.0236637	0.722275	0.412027	-0.0580789	476.558	530.721	379.215	558.69	454.246	524.904	554.821	28.6586	50.3887	426.45	145.003	83.7264	41.2485	60.2364	10.7532	524.499	34.2943	119.881	579.186	27.5579	73.5584	35.5914	315.674	13.8166	30.5289	476.594	35.8831	53.3579	263.264	57.9018	0.682711	447.528	494.077	0.905787	0.446461	120.77	28.9151	4.17671	0.188964	32.8332	53.1289	0.617992	0.268955
P83917	CBX1	-0.000256683	-0.17401	-0.00283741	0.221907	-0.0212848	561.978	461.414	407.072	525.457	468.345	529.127	119.803	302.385	145.829	274.785	170.122	162.706	157.116	167.666	305.818	120.478	162.057	185.497	128.395	322.871	151.974	164.046	305.495	125.371	352.959	123.935	348.841	210.733	139.892	112.234	0.427482	126.724	175.705	0.721231	0.784273	320.051	326.072	0.981536	0.953681	144.419	145.672	0.991399	0.121598
P23198	CBX3	0.217989	0.178614	-0.0141631	0.267699	-0.0742448	515.215	492.264	380.096	535.714	473.272	538.765	148.801	344.41	133.512	107.043	120.03	103.117	147.474	78.3264	342.954	126.587	142.817	83.0379	113.865	365.997	111.281	109.047	345.219	181.655	328.055	159.381	318.06	353.874	211.551	129.222	0.315633	162.313	126.763	1.28044	0.488208	335.411	346.154	0.968965	0.255069	152.661	118.34	1.29002	0.455566
Q61686	CBX5	0.100089	-0.375197	-0.213216	-0.0376978	0.00149117	534.399	477.928	474.789	489.818	476.528	504.086	138.926	419.561	175.488	179.437	72.38	114.038	176.005	195.87	295.243	149.358	185.409	68.7152	153.282	280.308	118.437	116.192	121.829	228.924	113.624	300.921	120.15	160.944	125.089	139.869	0.246111	137.791	211.213	0.652378	0.440369	179.074	271.165	0.660389	0.324646	196.607	170.581	1.15257	0.657637
Q8K1A6	CC2D1A	0.175849	-0.0732242	-0.0151829	0.523772	-0.0436757	495.517	462.713	445.442	532.492	424.121	574.381	206.777	194.719	227.255	212.539	214.325	160.051	249.753	207.497	230.285	234.499	353.136	190.625	313.42	271.483	118.695	135.956	206.135	350.182	244.509	282.196	236.345	160.378	268.153	288.336	0.407809	236.476	269.385	0.877837	0.642987	224.255	236.904	0.946608	0.281859	310.191	248.529	1.24811	0.067342
Q8CH18	CCAR1	-0.0465181	0.0031033	-0.121483	-0.000464512	0.0161316	514.616	464.402	529.244	475.138	517.364	458.985	212.246	315.593	162.223	172.844	108.582	122.846	178.886	162.246	255.542	148.465	160.787	95.907	197.463	236.602	108.364	69.4931	239.199	186.95	292.111	178.831	238.71	92.3438	203.416	217.583	0.832008	188.042	183.046	1.0273	0.252204	244.484	281.435	0.868703	0.443472	169.986	186.238	0.912737	0.944366
Q8VDP4	CCAR2	-0.147363	-0.00386943	-0.545967	-0.0430216	-0.117735	493.333	470.806	444.517	533.419	498.468	496.345	186.158	379.894	185.591	217.981	113.708	100.831	195.232	188.445	223.199	192.074	135.668	171.935	181.498	284.161	139.141	196.514	224.364	150.576	308.513	216.922	246.822	92.0995	223.169	166.758	0.778268	200.467	205.467	0.975665	0.0752944	231.461	324.19	0.713969	0.217305	157.278	183.478	0.857204	0.621861
Q9D8X2	CCDC124	-0.816205	0.686821	0.124726	0.00154784	-0.0727576	449.535	488.235	430.764	555.074	407.529	586.336	530.419	449.257	173.924	262.282	607.66	666.079	305.606	220.026	397.044	155.591	34.7184	325.731	68.7108	274.092	497.077	389.431	504.213	190.712	404.476	183.988	441.491	663.689	389.989	224.744	0.225911	358.666	171.66	2.0894	0.319417	447.583	375.942	1.19056	0.126771	133.118	250.125	0.532205	0.916277
Q3TC33	CCDC127	-0.237783	0.00802037	-0.0118281	-0.217869	0.0179086	514.76	490.765	495.052	459.719	493.487	502.592	209.45	277.044	145.795	224.935	294.826	670.899	170.585	165.518	52.8027	62.1447	68.5864	1250	72.357	63.8541	1103.79	1192.94	234.42	157.282	204.82	139.185	203.332	465.534	202.557	161.054	0.856747	158.051	145.492	1.08632	0.837653	163.518	181.906	0.898917	0.271302	123.888	165.719	0.747577	0.409481
Q8C7V8	CCDC134	0.0119752	0.000824991	-0.198431	-0.0121443								164.62	381.414	189.122	145.899	79.0149	45.584	171.002	145.917	336.258	179.865	147.521	43.8977	90.0106	302.74	79.4152	73.5363	219.039	200.951	321.227	139.413	262.403	61.7087	40.623	193.477	0.950132	128.369	125.107	1.02607	0.215946	272.567	335.127	0.813324	0.692032	179.198	170.132	1.05329	0.76586
Q9JIG7	CCDC22	0.0505824	0.000546969	-0.09728	-0.23866	-0.0676979	467.453	463.76	495.909	500.693	524.255	484.878	225.089	215.863	140.371	180.746	147.895	168.743	161.692	121.979	201.348	205.234	168.013	163.057	225.288	217.493	184.155	175.223	133.387	159.646	118.939	202.33	116.173	159.015	184.029	144.435	0.914704	204.784	202.788	1.00984	0.465095	150.303	184.099	0.816425	0.404359	156.01	142.702	1.09326	0.0381984
Q78PG9	CCDC25	-0.0187272	-0.434397	-0.0525355	6.13e-05	0.00059944	529.551	485.407	470.611	532.266	518.127	420.421	152.266	268.334	280.696	265.778	124.7	85.1963	305.193	350.811	307.37	199.503	324.376	127.441	223.938	237.341	111.468	98.8746	137.42	217.767	183.977	175.018	137.996	45.2322	115.479	230.913	0.139919	155.749	221.578	0.70291	0.607738	194.262	229.884	0.845044	0.671281	274.28	295.639	0.927751	0.984322
Q9D024	CCDC47	-0.0091082	-0.130052	-0.231038	-0.101248	0.000406971	508.085	551.213	419.789	508.438	450.661	507.224	154.671	195.901	199.178	189.218	154.469	156.261	219.535	280.182	112.478	271.89	361.206	58.105	287.927	146.866	199.586	161.187	157.431	228.385	200.229	238.402	163.457	198.94	145.393	340.381	0.395861	190.651	238.516	0.799325	0.194935	144.455	180.999	0.798102	0.794072	262.923	280.033	0.938901	0.492667
Q3URS9	CCDC51	-0.51514	-0.434096	-1.53e-05	-0.0889203	-0.0479766	420.407	519.441	460.87	450.478	557.352	513.526	226.474	162.345	226.918	310.809	428.744	484.453	250.918	261.73	70.9652	133.828	143.246	733.277	246.806	71.9651	889.051	458.917	165.942	228.019	186.161	211.795	182.147	289.896	185.658	366.092	0.13273	181.986	256.47	0.709582	0.992785	139.685	140.157	0.996629	0.117915	199.394	292.913	0.680727	0.543491
Q8R3Q6	CCDC58	0.336026	-0.000531539	-0.125623	-0.00255853	0.722412	523.365	555.16	546.652	433.112	454.195	461.633	232.984	165.088	168.616	188.875	517.811	519.939	168.284	129.763	147.091	211.321	170.468	359.688	234.886	161.154	709.307	519.995	101.469	188.97	97.3297	271.126	94.3368	808.635	242.853	100.168	0.926961	229.053	231.629	0.988877	0.387165	114.299	141.191	0.809535	0.149508	176.018	132.738	1.32605	0.89482
D3YZP9	CCDC6	0.610492	0.0819068	0.00577045	0.080606	-0.149313	466.659	471.675	470.385	514.23	519.772	490.09	213.328	154.919	167.187	185.274	203.64	278.906	188.025	157.169	367.373	656.296	1189.86	2931.6	511.264	355.844	782.613	1408.9	149.213	147.874	117.272	134.63	159.709	478.15	243.699	135.548	0.639369	371.108	277.056	1.33947	0.88303	225.432	209.345	1.07685	0.425779	501.64	160.248	3.13041	0.712967
Q4QRL3	CCDC88B	0.183141	0.0481587	4.07e-05	-1.55e-06								86.1084	506.415	65.5359	16.4091	160.541	101.338	82.2831	49.8874	816.107	59.8139	165.743	355.317	115.769	882.398	170.012	413.713	584.504	51.5638	440.659	28.9874	438.005	168.324	56.0763	57.3642	0.711515	67.3329	53.7219	1.25336	0.987064	612.872	609.824	1.005	0.481831	94.281	63.1782	1.4923	0.998087
Q8C3X2	CCDC90B	-0.635196	-0.57573	6.27e-05	0.0170793	-0.0384545	451.525	523.678	437.415	532.311	456.592	523.46	147.132	162.137	151.812	232.297	733.822	626.06	194.171	179.05	181.67	124.542	107.571	347.389	190.675	141.82	994.248	506.383	122.645	140.628	149.976	229.041	151.452	1314.65	192.14	184.019	0.0673428	154.604	217.338	0.711355	0.975499	151.922	151.311	1.00404	0.0469736	133.337	185.747	0.717844	0.795542
E9QAD4	CCDC93	0.000507328	-0.121056	-0.136846	-0.0363785								188.912	296.878	185.754	292.726	194.374	138.861	182.374	188.934	242.594	298.511	266.797	256.837	311.808	227.072	241.127	197.397	215.147	82.6357	270.218	169.651	230.405	36.7511	116.539	154.074	0.459264	201.321	258.062	0.780127	0.217796	229.382	264.723	0.866498	0.957155	178.395	175.127	1.01866	0.708188
Q7TQK5	CCDC93	-7.51e-06	-0.112441	-0.0864953	-0.0359088	-0.0261005	519.896	458.624	461.192	509.67	526.608	473.261	188.912	296.878	185.754	292.726	194.374	138.861	182.374	188.934	242.594	298.511	266.797	256.837	311.808	227.072	241.127	197.397	225.505	79.7634	286.533	168.857	253.367	37.4055	122.57	162.22	0.469475	203.331	257.797	0.788726	0.305274	240.489	270.161	0.890168	0.994749	177.438	177.843	0.997725	0.709408
Q8K2Y9	CCM2	0.284699	0.247176	-0.274576	0.337031	0.192297	557.423	578.271	468.282	471.107	446.55	452.974	112.373	558.147	107.233	80.6345	67.7228	67.6444	99.4648	88.338	404.024	84.8212	140.752	17.9461	82.3884	405.374	53.4027	27.3676	324.293	124.888	431.876	92.0933	370.839	222.991	129.284	112.799	0.202002	108.826	85.0388	1.27972	0.159389	366.385	465.132	0.787702	0.121357	124.291	100.201	1.24042	0.479687
Q64299	CCN3	2.31506	0.0835422	3.40493	-0.00591199								486.28	15.6349	14.9059	480.957	57.3421	145.63	7.08314	7.34943	43.9328	343.092	59.9626	102.806	582.133	13.1814	241.291	66.0135	34.7476	54.2854	5.50033	2346.27	56.6108	257.676	4277.61	7.122	0.718945	1702.33	1136.45	1.49793	0.0190346	45.0971	11.4389	3.94243	0.126982	43.0513	7.18486	5.99195	0.889638
P80314	CCT2	0.0568828	0.287823	-0.00196913	0.141604	0.109828	486.365	535.625	511.254	465.324	470.747	483.49	213.716	200.221	200.937	138.09	268.986	263.008	207.5	183.181	256.453	182.588	193	109.976	123.119	244.226	101.766	125.707	169.373	227.546	168.501	210.421	170.937	288.287	227.263	184.581	0.193021	207.856	157.21	1.32215	0.889188	198.921	204.316	0.973595	0.308902	207.161	191.754	1.08035	0.479836
P80318	CCT3	0.000109228	0.222617	-0.00765958	-0.0028024	0.0515081	495.628	493.9	512.454	481.862	485.074	483.168	182.224	199.589	180.355	144.497	171.855	163.671	188.224	176.396	198.165	164.339	195.933	250.086	162.833	195.624	239.438	264.776	171.29	179.516	160.006	157.547	166.412	225.38	222.186	189.583	0.171731	189.583	154.959	1.22344	0.708494	178.623	185.073	0.965148	0.941321	185.268	184.734	1.00289	0.866739
P80315	CCT4	-0.0242715	0.0140319	-0.0452778	0.00680074	0.172549	523.484	495.42	533.053	468.419	474.112	471.09	139.046	233.742	234.58	208.295	150.895	139.788	212.955	293.516	223.472	181.72	198.899	177.619	168.018	232.766	161.127	209.341	174.044	205.169	162.88	148.352	167.829	204.759	243.007	187.754	0.732338	187.924	174.888	1.07454	0.509968	188.448	209.796	0.898245	0.628609	212.882	231.408	0.919944	0.781918
P80316	CCT5	0.0301459	0.201219	-0.00011686	0.0898947	0.00558884	505.862	521.062	463.566	492.854	459.688	506.351	193.121	175.434	197.156	166.461	186.673	163.727	225.001	216.478	202.129	188.364	210.868	172.018	167.019	211.973	172.246	175.388	178.052	268.103	162.289	186.253	166.806	193.087	242.459	183.431	0.172498	207.981	173.244	1.20051	0.96296	182.329	183.232	0.995071	0.542925	225.376	208.303	1.08196	0.151669
P80317	CCT6A	-0.00288953	0.248689	0.0616419	0.000901615	-0.00139411	474.891	532.153	452.057	518.157	460.676	499.146	185.514	136.268	235.664	155.658	200.722	185.507	241.019	183.63	191.528	203.11	243.6	168.611	177.264	187.215	170.314	155.697	224.827	180.093	253.774	115.508	248.475	149.232	170.945	253.024	0.166521	186.523	149.477	1.24784	0.498306	221.61	192.419	1.15171	0.845088	219.786	225.891	0.972972	0.900166
P80313	CCT7	-0.151539	-0.0181024	-0.000912815	-0.000182954	-0.0012687	457.053	569.17	424.538	522.495	404.209	550.638	151.463	202.569	219.397	236.962	196.075	194.18	220.425	293.18	178.616	235.777	238.414	65.866	182.27	173.21	95.0418	102.647	212.452	228.877	238.161	153.192	214.171	125.215	138.484	298.143	0.712134	175.241	190.808	0.918417	0.90296	201.747	204.647	0.985829	0.235606	228.896	270.583	0.845938	0.976153
P42932	CCT8	-0.159528	0.00926679	-0.0017677	0.0867487	0.0487176	498.199	498.653	511.35	479.483	500.199	465.954	139.673	222.645	212.488	178.873	153.675	159.273	209.795	246.245	252.309	179.854	185.479	108.261	134.213	234.911	91.3126	104.659	202.44	226.587	214.417	184.251	206.092	160.283	203.429	276.148	0.744941	174.319	165.779	1.05151	0.844598	220.28	223.991	0.983434	0.201632	208.184	244.063	0.852995	0.448605
Q8C1Y8	CCZ1	0.00368737	0.173365	0.0441218	-0.307669	-0.180353	470.932	483.725	464.086	501.288	513.311	501.25	238.547	138.168	197.481	210.879	102.952	107.38	204.117	194.853	207.611	234.955	189.021	59.0048	227.255	224.617	85.4234	120.804	199.914	246.269	195.993	217.423	212.42	71.7312	241.115	217.556	0.0404528	238.206	218.519	1.09009	0.50768	206.648	186.259	1.10947	0.797491	210.924	205.509	1.02635	0.188365
Q8R422	CD109	0.268134	-0.0694633	0.106453	-0.0845466								442.187	14.8929	116.664	407.648	124.395	130.548	100.387	74.7652	40.6085	262.116	88.9145	241.359	359.087	35.2017	196.964	283.377	22.7715	140.42	21.3244	508.97	26.7825	125.964	400.293	89.3972	0.463106	368.199	425.235	0.865872	0.482375	30.0542	23.8063	1.26245	0.203028	115.333	88.183	1.30788	0.536969
O54901	CD200	-0.445576	-1.66565	-0.221783	0.00892366	-0.0711051	409.195	627.38	264.348	555.669	328.382	702.229	67.3672	223.968	282.155	310.592	129.489	59.9766	231.812	339.866	157.554	64.8248	172.064	118.592	90.7393	201.341	145.591	102.009	164.116	103.666	350.617	273.768	253.671	81.4852	47.2361	285.412	0.134495	59.8094	225.033	0.26578	0.306211	191.78	258.642	0.741489	0.190864	185.962	285.697	0.650906	0.813623
Q3UP36	CD22	0.303098	-0.0930374	-0.364122	-1.32e-05								25.4113	628.885	30.9255	22.1438	192.179	274.437	27.0514	19.507	480.276	24.3549	50.34	99.135	31.2164	578.292	70.536	95.7106	463.945	34.0604	535.867	30.2963	485.25	147.745	23.1461	36.1207	0.339517	24.3041	27.8855	0.871568	0.0533841	476.49	581.015	0.8201	0.233726	38.442	27.5597	1.39486	0.994333
Q9JLQ0	CD2AP	-0.132943	-0.000677595	-0.3754	-0.102918	-0.0126949	523.727	455.249	467.282	490.013	557.111	459.241	267.48	295.864	161.653	365.697	127.138	127.942	155.408	180.275	318.525	314.341	145.671	226.504	225.621	396.306	290.491	175.393	156.389	96.3191	259.327	243.617	177.249	109.977	239.918	148.361	0.934368	273.913	278.312	0.984196	0.204715	217.388	317.166	0.685408	0.310958	134.548	161.348	0.833896	0.514986
Q08857	CD36	0.0152782	-0.652979	0.000852918	-0.0344982								111.813	287.408	252.06	183.568	1129.82	1277.89	103.701	149.893	332.342	33.7546	43.5681	461.112	55.7124	244.149	812.879	696.143	212.877	83.6245	243.845	146.175	242.967	835.925	43.2564	78.3303	0.232136	62.9414	128.485	0.489874	0.920125	262.729	258.467	1.01649	0.832823	126.418	110.641	1.14259	0.671654
Q3U429	CD37	0.0143803	-0.0441218	-0.0152248	0.301939								32.8854	642.831	30.9919	16.9161	37.1732	35.357	25.4529	13.154	481.418	6.39197	28.649	65.066	15.9633	488.585	44.9934	48.5858	707.895	80.3089	902.815	85.6062	689.748	89.9487	52.5035	83.782	0.759013	30.5936	39.4952	0.774616	0.736206	626.354	678.077	0.923721	0.842673	46.6499	40.7963	1.14348	0.299002
P56528	CD38	-0.0544509	-0.150431	-0.178478	0.0834807	-0.00306069	373.008	454.109	609.567	541.583	544.553	398.238	170.803	368.34	276.167	275.289	284.833	220.348	226.639	222.8	322.365	163.707	96.3424	51.7933	129.492	311.328	31.1257	27.4362	125.806	208.119	150.314	260.288	143.809	66.5862	180.136	232.996	0.392054	171.548	221.69	0.773823	0.430443	197.327	276.661	0.713244	0.583956	193.543	227.478	0.850819	0.696635
A2APM2	CD44	-0.17894	-0.3213	-0.000149418	-0.0477376								80.6256	467.72	130.106	203.828	74.1025	79.2022	92.7023	139.735	483.016	85.6018	90.7154	24.7451	62.9621	292.292	17.2648	36.2217	316.198	88.4639	469.802	97.5598	421.216	4.22695	51.6565	164.437	0.368845	72.628	121.45	0.598007	0.96935	406.81	409.938	0.992368	0.318121	103.095	132.291	0.779302	0.739572
P18181	CD48	0.870429	-0.521969	-0.00638161	0.0604942								33.952	490.079	99.0435	36.4261	27.6866	31.3831	59.0291	52.0656	699.411	1.65331	149.653	99.7137	75.967	655.111	75.6118	65.0137	368.631	90.3651	405.761	82.0808	397.061	85.0637	67.11	75.8669	0.271152	34.2384	64.8247	0.52817	0.836217	488.367	516.983	0.944648	0.096932	113.021	62.3206	1.81354	0.633121
P13379	CD5	0.127997	-0.00162427	-0.305883	0.164127								53.2275	533.578	87.7688	35.9213	249.173	187.257	49.7011	43.2287	394.81	10.5224	61.901	109.406	11.5252	592.899	145.637	145.202	435.313	141.475	575.124	109.824	538.265	284.586	85.9501	122.606	0.948811	49.9	52.4236	0.951862	0.106447	456.13	567.2	0.804178	0.506925	97.0482	71.8454	1.35079	0.41345
P11911	CD79A	0.549235	0.000184822	-0.0644815	0.181499								29.275	730.558	29.0408	21.7527	27.8867	22.6621	23.5013	16.7967	452.261	6.97336	39.1978	63.8034	22.6962	484.385	53.0252	60.4926	613.673	32.5708	753.054	29.6642	649.294	108.86	38.8071	29.3363	0.976922	25.0185	24.7044	1.01271	0.473014	571.743	655.999	0.87156	0.0935419	33.6031	23.2114	1.4477	0.473147
P35762	CD81	0.616689	-0.0589896	4.32e-05	-0.214484	0.00904524	473.852	500.406	513.331	480.323	493.42	484.084	179.569	145.304	191.085	141.31	185.46	203.776	170.824	122.11	266.335	218.934	346.921	808.692	336.837	303.326	1038.91	806.653	162.958	207.298	165.495	223.199	187.996	304.146	191.104	140.567	0.581292	196.536	233.782	0.840678	0.986661	205.763	204.708	1.00515	0.162625	248.435	144.5	1.71927	0.472391
P40237	CD82	-1.46051	-0.284576	0.136269	-0.0353862	-0.0335452	431.084	582.051	361.356	545.386	373.36	614.924	166.203	135.944	164.813	492.875	109.616	173.247	211.965	572.25	297.904	81.9406	174.64	4.90478	82.7294	154.762	10.6487	19.6702	161.089	99.0052	264.418	39.1363	251.215	41.2259	45.9165	523.512	0.540141	98.0202	204.913	0.478349	0.413628	236.736	185.041	1.27937	0.118469	146.153	435.909	0.335283	0.809834
P40240	CD9	0.0889263	-0.935403	-0.00845885	0.126914	-0.0225589	489.935	433.928	510.234	484.676	556.543	470.276	206.73	75.4681	213.944	343.006	244.442	312.144	254.313	152.914	22.0612	280.874	242.198	70.3287	383.333	23.4162	98.1335	28.5827	52.8478	247.68	42.7734	310.919	55.4377	326.443	181.797	199.024	0.0330781	223.133	345.752	0.645356	0.85024	43.4489	47.2192	0.920153	0.386326	234.607	202.084	1.16094	0.58614
O89103	CD93	-0.00994396	-0.32098	-0.620251	-0.029068								131.326	498.18	360.458	256.016	237.839	256.07	283.232	546.115	302.784	131.584	242.955	516.091	94.0924	395.463	367.9	346.817	101.683	275.163	158.113	234.476	129.127	72.3962	115.468	133.548	0.307997	126.126	194.861	0.64726	0.232506	177.865	350.585	0.507337	0.840984	292.858	320.965	0.912431	0.749802
P56389	CDA	-4.60828	0.537215	0.000153366	0.0138928	0.010461	509.455	455.111	544.098	479.495	536.377	435.399	264.372	21.973	212.099	110.588	162.157	191.233	824.943	894.744	5.0724	138.931	183.94	3.57848	136.496	2.26922	40.3298	35.9579	13.7203	189.032	9.83083	120.653	15.7532	143.038	191.567	717.596	0.168193	198.29	122.579	1.61766	0.982392	11.5153	11.3577	1.01387	0.00577345	195.024	812.428	0.240051	0.856745
Q8CII2	CDC123	0.0615953	1.44812	0.0723551	-0.159735								248.311	109.346	398.551	143.966	189.775	169.216	363.491	418.712	106.068	267.805	358.779	121.112	194.945	128.803	196.704	182.804	175.034	483.353	91.5179	161.544	107.446	143.844	284.838	331.293	0.00733933	266.985	166.818	1.60046	0.495232	129.516	109.889	1.17861	0.402955	413.561	371.165	1.11422	0.257467
Q8R349	CDC16	0.0827328	-0.01005	-0.0156915	-0.236334	0.00111536	496.333	492.3	493.975	447.598	510.265	510.052	98.7554	288.107	165.304	146.915	146.647	131.976	137.151	155.232	207.121	134.845	166.031	219.776	146.416	194.271	239.947	259.6	238.433	156.638	238.073	110.366	232.404	80.0462	149.302	158.238	0.738374	127.634	134.566	0.948489	0.662348	225.986	240.15	0.941019	0.190488	162.658	150.207	1.08289	0.33697
Q61081	CDC37	0.886756	0.0392292	0.0065541	0.342742	-0.0963433	469.478	477.684	456.649	496.774	549.69	483.144	226.57	203.278	173.032	143.489	207.984	240.661	158.41	113.018	217.505	190.257	244.263	398.691	226.873	167.155	219.284	255.325	158.305	227.637	104.798	199.223	126.608	469.632	210.912	136.556	0.525158	209.246	189.862	1.1021	0.828589	167.473	158.41	1.05721	0.0454696	214.977	135.995	1.58078	0.26219
P60766	CDC42	-0.634216	-0.2181	-0.0540026	0.236933	-0.0505693	501.311	514.736	373.283	515.877	438.822	586.833	170.997	277.016	165.624	380.064	100.379	115.388	159.786	351.226	241.888	127.382	135.605	174.799	119.398	210.626	129.936	147.099	209.045	128.418	299.935	145.567	257.088	320.959	116.698	256.026	0.454012	138.359	215.01	0.643501	0.445133	236.007	262.526	0.898985	0.174382	143.216	255.679	0.560138	0.404789
Q7TT50	CDC42BPB	-0.00334879	-0.00159047	0.00385193	0.230916	0.0264898	510.125	504.092	483.437	477.519	488.538	489.955	254.023	109.515	264.617	236.173	144.539	134.661	272.14	289.816	109.313	173.018	232.512	36.9483	197.591	114.606	93.7935	114.124	109.532	273.323	107.768	206.942	118.055	426.727	200.83	227.029	0.882106	209.29	213.569	0.979968	0.663535	112.3	110.629	1.0151	0.798635	256.817	262.995	0.97651	0.526216
Q80UW5	CDC42BPG	-0.00161261	0.0222174	-0.177784	-0.0269989								288.89	133.076	186.036	229.308	99.2545	114.003	212.938	190.821	85.8326	226.935	158.512	109.858	211.427	106.159	150.373	129.482	95.5906	186.283	97.1141	282.928	98.1688	152.124	257.534	138.428	0.586316	257.786	241.221	1.06867	0.215393	93.1973	112.116	0.831256	0.885515	176.944	180.729	0.979054	0.607498
Q8BGH7	CDC42SE2	0.0676912	3.88681	-1.12101	0.581272	0.030485	521.106	409.772	625.303	440.69	566.494	411.3	179.625	1142.89	33.3635	20.812	112.106	97.1485	34.4678	9.11194	400.988	127.398	18.9662	283.503	21.555	653.604	124.398	156.759	295.665	55.072	599.503	71.69	345.544	295.898	132.751	41.3973	0.0100856	146.592	38.019	3.85575	0.116574	347.399	798.665	0.434975	0.630455	35.8006	28.3257	1.26389	0.214794
Q6A068	CDC5L	0.0170554	0.176172	-0.410091	0.0731605	-0.0597087	485.614	457.623	483.256	472.838	522.316	519.51	181.95	338.388	133.67	144.48	218.606	201.33	143.991	122.47	229.771	120.922	103.589	232.671	98.8242	266.941	216.256	237.583	225.476	145.478	254.009	176.444	192.614	272.74	256.227	89.7838	0.374997	186.366	139.916	1.33199	0.0985703	215.954	286.446	0.753907	0.684194	127.579	118.748	1.07436	0.310806
A0A0R4IZW5	CDH1	-0.208273	-0.199504	-0.137562	0.116344								198.738	37.5087	219.118	578.225	125.629	129.381	235.841	476.682	6.00289	238.738	247.996	39.2248	362.046	4.02837	38.9936	27.9565	10.0837	307.145	5.85204	260.545	13.1154	108.63	421.493	331.407	0.386577	286.323	400.272	0.715321	0.635414	9.73401	15.7964	0.616218	0.328791	258.086	347.977	0.741678	0.571069
P55288	CDH11	-0.288492	-0.153374	-0.0105029	0.0103093	-0.0314609	467.553	503.063	465.811	502.493	521.676	475.336	99.4412	284.647	130.3	147.878	88.4291	105.326	138.408	137.101	577.004	29.3921	128.528	139.085	142.901	593.293	121.645	147.048	201.34	100.044	218.747	292.887	213.556	171.723	270.778	169.839	0.524054	133.204	194.555	0.684657	0.84627	330.634	365.563	0.904451	0.118508	119.624	148.449	0.805825	0.777102
Q9R100	CDH17	-0.0613299	-0.0102414	-0.0316973	0.0269512								196.843	16.1889	271.823	195.792	134.959	137.482	344.873	390.886	13.2529	197.286	337.477	29.3197	242.674	14.0369	43.4022	41.57	9.63036	405.744	12.152	227.169	15.6851	98.9447	243.818	399.74	0.680646	212.649	221.878	0.958402	0.584444	12.8561	14.1259	0.910108	0.41775	338.348	378.5	0.893919	0.774439
P15116	CDH2	0.00950419	-0.0626571	-0.362063	-0.178281	-0.00862244	500.845	467.626	481.398	490.479	556.131	451.58	108.322	74.3523	71.402	114.141	2037.4	2115.95	71.748	57.7714	48.2926	54.538	50.9587	2001.98	76.1291	75.527	2531.04	2017.28	47.6815	62.378	49.5075	134.438	48.7575	1601.6	112.136	45.5291	0.54782	91.6654	108.236	0.846902	0.164677	48.2439	66.4623	0.725884	0.754622	61.5795	58.3495	1.05536	0.181429
P55284	CDH5	0.00116771	0.0493903	-0.00039652	0.409015	0.170285	652.966	382.939	672.478	457.29	567.467	293.504	306.203	313.727	355.508	212.885	1160.61	1155.28	249.964	166.699	456.507	92.1408	100.23	313.163	87.5237	422.406	648.705	240.438	235.933	157.46	227.39	174.144	256.433	2867.13	178.423	177.273	0.667569	192.256	158.184	1.21539	0.959533	316.291	321.174	0.984796	0.94328	204.399	197.978	1.03243	0.420223
E9Q7P9	CDHR2	-0.503341	-0.109885	-0.103635	0.0512173								113.327	53.604	222.564	270.914	78.0733	120.267	319.115	672.412	104.482	256.884	285.97	64.3267	302.735	147.515	35.6339	31.2747	25.2161	445.78	25.7189	143.68	27.5104	87.7643	196.084	564.414	0.47625	188.765	239.11	0.789448	0.636921	52.403	75.6127	0.693045	0.193328	318.105	518.647	0.613336	0.67342
A0PJK7	CDHR5	0.0345976	-0.918798	0.00938023	0.677425								177.025	21.2573	283.631	362.78	64.6503	151.311	342.689	288.189	14.8881	230.322	330.403	79.5715	410.344	10.8985	91.7265	72.8993	14.4759	473.139	8.21923	310.363	14.1352	1130.91	285.157	346.673	0.037778	230.835	361.162	0.639145	0.81801	14.4997	13.4584	1.07738	0.594797	362.391	325.85	1.11214	0.46075
Q8VDP6	CDIPT	-0.316386	-0.100967	0.0126653	0.0375652	0.262828	553.87	507.641	542.97	432.561	435.191	506.625	162.106	177.621	196.275	170.585	98.0942	120.065	223.896	223.024	204.894	139.639	178.281	65.8895	155.116	190.761	62.1184	38.2176	206.89	197.799	213.471	147.392	191.804	93.0783	110.479	336.566	0.310353	137.408	157.698	0.871337	0.576274	201.196	193.951	1.03736	0.20025	190.785	261.162	0.730523	0.677294
P11440	CDK1	-0.00297907	-0.00864224	0.592269	0.0953905								146.706	162.167	253.315	165.315	116.67	90.9185	243.352	368.203	413.063	268.236	508.58	279.147	305.482	309.862	190.802	197.014	327.635	208.475	172.351	103.216	272.254	207.651	112.581	402.742	0.849325	175.841	191.338	0.919009	0.123715	337.651	214.793	1.57198	0.898173	323.457	338.099	0.956692	0.518136
P24788	CDK11B	0.0305793	-0.048622	-0.0224983	0.00708689	-0.000258122	496.738	484.963	490.26	482.553	509.062	484.99	150.088	245.569	192.47	137.603	108.835	125.096	188.654	188.589	202.876	137.367	183.052	211.88	154.37	216.744	147.147	174.474	237.178	219.676	270.483	154.881	250.803	151.438	131.288	185.08	0.302892	139.581	148.951	0.937093	0.543739	230.286	244.265	0.942769	0.423595	198.399	187.441	1.05846	0.815263
Q99LM2	CDK5RAP3	0.0822169	0.736981	0.128902	0.001103	-0.0641113	474.234	388.98	504.099	540.064	641.442	387.022	136.313	180.256	178.986	124.324	284.847	393.507	172.841	137.457	185.164	290.937	319.989	41.9065	160.601	234.705	90.4212	34.4684	342.808	78.1172	249.101	100.486	294.713	213.781	297.189	136.136	0.155077	241.48	128.47	1.87965	0.382711	274.229	221.354	1.23887	0.599798	192.364	148.811	1.29267	0.958777
Q64261	CDK6	0.218489	0.19012	0.00397117	0.00535638								242.002	83.4137	131.376	118.806	260.956	357.972	100.177	114.283	220.746	174.394	178.811	166.564	201.602	220.089	208.265	189.619	118.544	76.3595	112.726	158.879	100.942	372.976	186.236	62.1613	0.265796	200.877	159.762	1.25735	0.893111	146.744	138.743	1.05767	0.352683	128.849	92.2071	1.39738	0.861583
Q03147	CDK7	-0.0799725	0.0835567	-0.000904734	0.650213	0.0713342	493.666	500.028	537.99	449.858	510.593	465.588	341.138	303.742	346.86	232.421	186.902	154.847	324.292	325.335	331.209	133.11	117.207	146.592	107.146	320.286	95.949	103.081	277.389	201.119	307.95	182.653	314.048	297.21	186.088	177.079	0.566483	220.112	174.073	1.26448	0.866341	307.549	310.66	0.989986	0.555902	221.729	275.568	0.804623	0.165998
P46414	CDKN1B	0.262027	-0.0258998	-0.42923	-1.61e-05	-0.202684	420.013	509.844	373.18	585.446	432.763	578.478	180.113	477.94	116.132	146.865	365.393	389.186	135.551	93.853	271.657	225.778	148.359	198.998	287.231	463.578	100.863	148.528	272.769	186.42	310.139	396.818	341.473	71.3501	326.483	113.389	0.720751	244.125	276.971	0.881408	0.137776	295.3	417.219	0.707781	0.217514	150.304	114.264	1.3154	0.994253
Q8BI72	CDKN2AIP	-0.50202	-0.47469	-0.0251508	-0.00918715								121.706	333.551	118.92	209.753	60.0106	104.484	134.398	193.914	207.754	139.113	80.2832	110.466	150.905	208.979	117.262	130.552	282.913	161.154	361.764	229.524	329.845	158.132	153.529	216.183	0.117442	138.116	196.728	0.702066	0.66175	273.504	301.432	0.907351	0.143538	120.119	181.498	0.661818	0.810068
Q4VAA2	CDV3	0.575324	0.221332	-1.27208	0.0717604	-0.017021	500.356	448.598	480.823	507.658	424.235	579.664	32.8579	610.353	24.9796	29.3261	181.477	204.333	20.342	12.3597	267.526	125.42	27.7675	343.957	74.3851	545.508	200.177	109.891	435.812	13.995	738.739	51.792	389.732	118.86	78.4666	5.79202	0.431519	78.9149	51.8344	1.52244	0.0249398	364.356	631.533	0.576939	0.188533	22.2474	12.8312	1.73384	0.60129
Q64285	CEL	-0.0228525	2.57649	1.12155	0.0399568								370.948	1.65589	12.7466	9.24494	34.1907	27.0846	11.8048	8.7992	83.1611	549.036	70.1613	68.4516	50.9423	96.1685	60.1917	60.0641	1237.28	20.9665	110.375	96.988	111.935	68.06	144.924	107.552	0.11657	354.97	52.3918	6.77529	0.395285	477.459	69.4	6.87982	0.840609	34.6248	42.7186	0.810532	0.648361
Q91X79	CELA1	2.60574	0.59897	1.40498	0.146614								290.96	15.8926	259.414	65.6307	97.688	87.1383	137.065	117.029	18.6342	691.721	382.985	73.8317	254.624	11.0001	75.9189	44.2867	703.828	315.809	44.2659	140.231	64.6079	85.5087	119.55	87.4177	0.334444	367.41	153.495	2.39363	0.393369	262.357	23.7195	11.0608	0.0177545	319.403	113.837	2.80579	0.336437
P05208	CELA2A	4.40591	2.23444	1.86507	0.629632								429.639	12.7314	171.662	24.5286	16.7052	20.3292	23.832	12.3755	21.7437	717.682	200.627	154.078	46.7609	15.8197	80.2243	102.159	1678.75	333.603	32.1693	57.2955	48.4655	416.697	54.964	32.1517	0.202837	400.762	42.8617	9.35012	0.412387	582.985	20.2401	28.8034	0.0491956	235.297	22.7864	10.3262	0.388906
Q9CQ52	CELA3B	-0.484933	-3.28328	1.62235	0.00648852								103.387	14.9092	188.384	434.111	72.2699	96.6758	336.826	484.843	11.555	187.473	221.365	31.1509	324.876	6.85707	43.0531	34.9789	592.883	358.793	9.7948	322.291	13.4528	84.6362	49.7244	333.127	0.0107157	113.528	360.426	0.314982	0.418727	205.964	10.5204	19.5776	0.149453	256.18	384.932	0.665521	0.868797
Q5FWI3	CEMIP2	0.0810278	0.00267053	-0.0199226	-0.00832937	0.0201046	518.76	421.315	596.086	432.708	558.684	442.492	245.321	260.15	272.794	227.443	350.101	301.739	200.281	213.236	149.742	174.274	172.28	334.62	191.735	150.635	376.849	291.18	208.67	284.083	190.046	312.634	193.739	240.767	339.09	211.52	0.888526	252.895	243.937	1.03672	0.686375	184.05	200.277	0.918979	0.431997	243.052	208.346	1.16658	0.752429
Q9CXS4	CENPV	-1.25924	-0.389895	-0.415917	0.126302	-0.111425	502.92	401.772	479.481	532.167	553.037	471.317	290.574	204.348	411.244	560.257	256.342	239.528	556.366	652.384	75.6403	186.531	169.801	164.503	277.775	106.583	95.2371	47.6106	88.3633	231.145	96.0925	312.828	83.7418	108.203	254.928	413.408	0.252738	244.011	383.62	0.636075	0.262612	82.5818	135.674	0.608677	0.0547352	270.73	540.719	0.500685	0.537476
Q6P5D4	CEP135	0.792859	-0.042229	-0.0052131	-0.0120923								113.243	435.768	117.149	112.378	203.204	171.259	123.051	91.4816	1133.45	229.189	400.618	549.869	309.988	1290	450.199	455.412	342.607	151.708	286.807	126.664	378.661	220.326	112.333	45.2293	0.699213	151.588	183.01	0.828308	0.903153	618.24	670.858	0.921566	0.262729	223.158	86.5874	2.57726	0.826092
A3KGJ7	CEP250	0.0675392	-0.0114847	0.00231474	0.056163								99.1982	428.99	107.453	72.8771	108.389	128.053	97.3387	71.6067	289.93	101.416	131.917	196.899	108.45	257.245	254.975	254.018	490.291	176.429	422.427	184.56	364.222	504.099	136.06	175.599	0.80229	112.225	121.962	0.920158	0.890202	381.481	369.554	1.03227	0.563585	138.6	114.848	1.20681	0.68772
Q8BGS7	CEPT1	0.388928	0.114121	-0.00856507	-0.0190477								236.031	154.562	143.937	131.51	158.733	131.079	155.23	130.96	230.918	464.542	345.445	195.151	462.77	279.936	282.33	227.688	178.052	247.98	162.136	235.359	150.566	229.892	388.257	180.286	0.511729	362.943	276.546	1.31241	0.808207	186.512	198.878	0.937819	0.257764	245.787	155.492	1.58071	0.722832
Q924Z4	CERS2	-0.0621884	-0.0692579	-0.131237	-0.1264	0.0290152	544.796	491.166	498.47	484.574	543.788	406.037	260.492	402.673	344.483	276.399	207.386	151.564	288.483	394.449	194.67	167.817	192.595	144.049	172.957	188.25	167.609	172.454	287.294	95.0379	481.733	163.779	339.716	6.0492	67.8918	111.73	0.593106	165.4	204.378	0.809286	0.455737	273.894	357.552	0.766024	0.648094	210.705	264.887	0.795452	0.53092
Q8VCC2	CES1	-0.00461433	0.00335475	0.000396277	-0.503017								949.992	23.7656	155.494	828.572	26.0268	144.201	191.678	205.663	17.5452	382.323	203.044	166.068	528.535	14.539	187.29	168.113	11.8913	28.7693	9.78593	376.42	19.4111	100.053	490.492	19.9192	0.89887	607.602	577.842	1.0515	0.960318	16.2825	16.0302	1.01574	0.905865	129.102	139.087	0.928215	0.223964
D3Z5G7	CES1B	-0.42373	0.0283433	-0.191806	-0.301694								235.451	199.989	97.5498	97.5393	1135.4	1276.85	97.0406	96.5346	64.0597	170.648	120.087	648.393	275.262	91.1958	810.976	991.525	109.825	61.7181	261.435	168.003	208.348	247.67	206.804	402.166	0.696661	204.301	180.268	1.13332	0.435867	127.411	184.207	0.691673	0.409428	93.1183	198.581	0.468919	0.314247
P23953	CES1C	-0.108375	-0.129813	-0.25061	-0.485029	-0.000209069	462.186	571.321	426.145	588.089	447.267	435.512	204.51	136.331	191.345	182.594	938.359	1076.07	180.404	137.294	94.8467	129.014	126.853	620.972	208.582	134.94	907.18	1005.77	110.08	128.566	156.861	208.973	139.751	474.697	173.639	220.749	0.292084	169.054	200.049	0.845062	0.158064	114.893	142.711	0.805074	0.395869	148.921	179.482	0.829728	0.133842
Q8VCT4	CES1D	-0.0117419	-0.308941	-0.0258488	-0.353484								333.356	65.533	218.558	306.27	556.66	640.705	185.233	148.672	34.8631	233.313	137.343	524.31	378.981	40.7527	635.531	606.759	48.527	152.004	50.006	376.798	58.4488	244.939	272.883	206.557	0.122771	279.851	354.016	0.790502	0.653659	47.2796	52.0973	0.907526	0.739612	169.302	180.154	0.93976	0.200207
Q64176	CES1E	-1.57076	-0.0135491	0.962112	0.43167								361.315	11.1074	192.076	384.739	97.1639	87.208	400.492	363.636	28.7688	289.762	150.606	152.179	418.782	20.6311	122.673	88.5004	24.0721	216.132	14.0302	356.277	23.1817	261.749	443.832	289.43	0.686881	364.97	386.599	0.944051	0.0485018	25.3409	15.2562	1.66102	0.0191865	186.272	351.186	0.530407	0.277991
Q91WU0	CES1F	-1.07008	0.280803	0.12847	0.145585								417.638	10.4728	171.6	337.203	66.1108	86.6367	352.548	336.843	15.9563	333.862	126.641	69.849	350.233	8.92503	60.4166	35.6932	6.3108	174.876	10.6523	277.814	16.9645	98.7726	483.723	212.533	0.162472	411.741	321.75	1.27969	0.463448	13.0772	10.0167	1.30553	0.0708564	157.705	300.641	0.524564	0.395284
Q8QZR3	CES2A	0.0940866	1.1115	0.278654	0.364672								193.942	12.0415	300.065	105.999	127.383	113.662	302.234	362.018	9.19033	220.518	390.405	20.94	178.216	3.68754	40.1134	35.1789	48.4823	475.129	38.3077	108.481	35.9678	219.638	279.403	332.225	0.0443162	231.288	130.899	1.76692	0.445342	31.2135	18.0122	1.73291	0.383695	388.533	332.159	1.16972	0.417574
Q91WG0	CES2C	-0.731033	-0.706029	0.0222337	-0.0711794								221.694	31.5332	161.845	407.871	116.327	153.402	263.354	386.697	17.8437	245.922	222.063	108.247	477.344	9.80276	113.935	105.7	22.6415	261.999	18.9309	321.151	27.3366	103.232	320.365	348.077	0.0709464	262.66	402.122	0.653185	0.740473	22.6073	20.0889	1.12536	0.0685092	215.302	332.71	0.647118	0.415235
Q8BK48	CES2E	-1.14334	-0.375219	-0.0867029	0.0386243								96.9992	18.8092	243.599	148.541	107.924	111.179	461.973	733.542	10.9911	106.315	385.84	33.0656	154.814	9.05166	46.0513	45.2738	9.94503	377.23	12.7046	104.459	12.4429	100.809	95.8999	673.685	0.14457	99.7381	135.938	0.733703	0.491796	11.1264	13.5218	0.822845	0.0524105	335.556	623.067	0.538556	0.706375
E9PV38	CES2G	-1.01351	-0.322695	1.15465	-0.0301496								240.58	18.4332	176.57	387.649	89.8891	107.254	301.215	379.844	41.0296	260.549	225.324	148.768	501.983	16.9655	127.423	139.89	27.6493	245.045	12.6729	270.266	26.2136	101.195	318.829	313.295	0.226514	273.319	386.633	0.706923	0.0665457	31.6308	16.0239	1.97398	0.0232082	215.646	331.451	0.650612	0.609715
Q8BTU1	CFAP20	-0.0944453	0.000924776	-0.511701	0.80139								194.568	251.335	228.874	181.771	302.333	294.395	213.876	171.59	197.766	154.166	205.443	213.437	220.639	215.504	138.818	134.623	145.621	155.087	204.096	342.069	160.513	1501.48	416.157	337.392	0.946898	254.964	248.159	1.02742	0.0576933	167.966	223.645	0.751041	0.47781	196.468	240.953	0.81538	0.364589
P03953	CFD	0.463524	0.0225992	-0.00383987	0.296197	-0.0185554	461.926	447.861	520.802	527.147	543.786	436.062	207.063	135.838	213.67	143.602	699.164	542.137	117.926	111.769	91.091	167.865	168.074	571.843	191.45	81.1723	492.802	592.161	84.2012	107.547	62.5011	167.591	92.0607	808.797	162.707	84.0456	0.585112	179.212	167.548	1.06962	0.871275	89.1176	93.1706	0.9565	0.189239	163.097	104.58	1.55954	0.145756
E9Q8I0	CFH	0.0160195	-0.563905	-0.00563268	0.0320076	0.153955	510.173	535.867	543.493	514.664	470.594	391.004	149.106	162.627	229.533	189.099	571.454	497.62	184.375	200.939	125.464	113.295	186.826	503.787	147.286	150.424	512.509	447.689	157.409	185.082	184.762	188.479	195.705	474.528	120.247	187.69	0.0579653	127.549	174.955	0.729042	0.796015	159.526	165.938	0.961361	0.589853	200.48	191.002	1.04963	0.433781
Q4LDF6	CFHR2	0.471977	-2.71e-06	-0.00187273	0.113389								182.625	179.915	207.394	116.311	644.426	553.161	192.941	108.894	137.124	127.514	227.029	498.412	172.17	185.34	406.739	356.564	187.902	213.607	163.479	172.261	192.961	434.522	150.161	156.121	0.995502	153.433	153.581	0.99904	0.864536	172.662	176.244	0.979676	0.114194	216.01	152.652	1.41504	0.367537
Q61129	CFI	0.00216638	2.27e-07	-0.000325934	-0.299236								116.587	164.895	150.913	135.232	863.059	855.401	123.659	122.889	154.404	136.487	145.058	615.464	144.544	167.491	649.184	1101.5	162.457	124.655	163.237	162.814	176.174	348.266	189.639	164.747	0.998708	147.571	147.53	1.00028	0.905423	164.345	165.208	0.994778	0.857165	140.209	137.098	1.02269	0.260743
P18760	CFL1	-0.00307172	0.0515981	-0.0415845	-0.355634	0.00639967	484.981	558.878	453.262	470.949	424.906	550.499	72.7982	413.522	84.2631	123.547	70.1509	81.2431	83.4536	131.134	330.152	164.062	163.93	79.9302	128.879	312.652	90.7898	99.9319	339.707	104.799	442.229	70.3078	394.658	70.6007	142.895	152.92	0.602808	126.585	107.578	1.17668	0.490287	354.839	389.468	0.911087	0.885452	117.664	122.503	0.960503	0.0661095
P45591	CFL2	-0.0683812	0.000421305	0.00178241	0.403696	-3.5e-05	522.305	523.014	425.795	490.052	389.225	596.592	192.44	144.568	162.551	262.791	300.769	318.53	165.604	192.244	224.322	240.389	193.328	259.257	219.526	143.301	189.034	210.875	72.199	140.835	91.2036	204.961	97.4131	729.161	261.4	195.379	0.935357	231.41	229.093	1.01011	0.928695	131.311	126.358	1.03921	0.363184	165.571	184.409	0.897848	0.332213
Q8BHG9	CGGBP1	0.00203847	-7.65e-06	-0.956178	0.351583								128.708	522.729	128.266	125.887	96.2363	111.388	124.885	109.359	366.98	180.22	143.261	86.3572	170.404	452.194	80.1843	72.5445	317.263	211.825	494.948	277.342	380.748	310.01	263.414	232.445	0.994597	190.781	191.211	0.997749	0.00877051	354.997	489.957	0.724548	0.911433	161.117	155.563	1.03571	0.406468
E9QMC1	CGN	-0.0397372	0.119209	0.237068	0.010711								465.335	23.089	233.076	231.784	164.077	91.9053	258.096	187.126	24.9373	240.936	200.212	84.1908	276.571	29.476	127.443	105.803	54.5508	209.648	46.9887	435.54	64.3899	100.73	491.895	258.335	0.450395	399.389	314.632	1.26939	0.357928	47.9593	33.1846	1.44523	0.494661	214.312	234.519	0.913837	0.785416
Q9CRB9	CHCHD3	-0.258044	-0.332213	-0.000757112	0.000557686	-0.144326	421.728	546.325	354.038	563.512	459.149	557.44	191.467	105.27	247.096	310.714	518.656	377.787	263.803	249.242	199.382	119.255	98.9106	1027.76	149.621	176.07	838.637	1088.41	73.7708	178.108	86.6659	263.295	85.6999	804.039	183.604	204.326	0.248741	164.775	241.21	0.683119	0.953159	119.618	122.669	0.975126	0.269254	174.705	239.124	0.730604	0.955604
Q91VN4	CHCHD6	-0.396949	-0.0023842	-0.00974423	0.0194742	-0.00111736	446.379	493.191	518.604	490.285	450.41	535.308	211.632	67.128	179.072	121.832	530.44	362.534	200.691	121.405	150.218	182.183	278.508	338.156	272.699	142.204	347.333	253.255	152.789	69.7809	302.511	91.0144	163.137	203.181	69.4873	850.832	0.922058	154.434	161.849	0.954189	0.846797	155.382	170.614	0.910718	0.452689	175.787	390.976	0.449611	0.747687
Q9CXF7	CHD1L	0.0373833	0.0682252	-0.04541	-0.0758184								143.314	452.724	161.516	124.538	196.937	219.228	154.831	156.882	274.224	130.874	158.231	85.4975	110.197	348.071	94.6482	74.5755	432.364	238.459	416.884	169.077	387.175	5.9554	191.498	190.767	0.465888	155.229	134.604	1.15322	0.508999	364.588	405.893	0.898236	0.567054	186.069	167.493	1.1109	0.666132
B1AR17	CHD3	0.0118514	-0.0166756	-0.0017225	0.00354986								169.191	288.462	129.014	138.013	144.938	93.2461	139.425	124.764	391.451	127.923	222.405	109.313	186.047	363.469	155.756	182.304	292.818	129.486	394.596	148.272	340.911	195.54	147.193	182.9	0.6472	148.102	157.444	0.940664	0.875122	341.726	348.842	0.979601	0.771496	160.302	149.03	1.07564	0.873709
E9QAS5	CHD4	-0.0821502	-0.00579005	-0.185674	0.0765282	0.023644	510.378	530.596	471.049	486.178	437.982	516.517	137.156	356.412	162.716	176.596	111.452	106.337	158.465	185.543	310.287	172.053	186.927	104.524	188.454	324.317	111.755	132.626	294.666	137.803	375.942	107.281	327.703	211.471	142.037	207.651	0.8168	150.415	157.443	0.955361	0.0931308	310.886	352.224	0.882637	0.346622	162.482	183.886	0.883602	0.539366
Q09XV5	CHD8	-0.31966	0.16296	-0.160898	-0.128142	0.0553484	649.58	383.823	574.635	373.906	568.635	460.187	190.485	326.284	194.467	158.279	261.451	204.691	199.218	150.408	202.346	138.644	47.6046	270.959	92.8571	225.595	283.541	304.786	227.318	93.1287	259.757	110.459	243.146	81.2106	126.149	164.082	0.323377	151.759	120.532	1.25908	0.254374	224.27	270.545	0.828956	0.302695	111.734	171.236	0.652513	0.45048
Q8BJ64	CHDH	-0.911308	-0.822835	-0.0246152	-0.0120507	0.00867911	507.405	487.901	515.898	474.248	575.509	398.269	176.866	49.7436	253.387	458.954	126.539	136.59	340.912	586.396	41.8837	244.318	339.402	60.7153	302.714	30.7877	84.5002	87.2261	31.9501	231.93	37.8127	268.162	34.658	98.1449	152.726	592.737	0.105806	191.303	343.276	0.557286	0.636366	36.1639	39.448	0.91675	0.0926691	274.906	506.682	0.542562	0.779565
G5E8I8	CHERP	-0.00265405	0.140198	-0.00217408	0.240775	0.00168235	522.954	495.29	467.406	478.687	475.981	513.911	185.02	230.23	218.154	157.801	178.838	205.829	223.625	180.335	368.978	181.038	124.647	135.214	127.93	403.795	111.709	127.648	241.101	216.712	236.257	183.726	231.576	355.42	183.181	173.48	0.240358	183.08	156.486	1.16994	0.901455	280.552	290.094	0.967107	0.87431	186.505	192.48	0.968956	0.389895
A0A0R4J242	CHID1	0.457474	0.135874	-0.0490529	0.0245234	0.0787872	543.397	481.166	516.506	448.506	475.599	503.692	305.076	149.881	145.83	212.978	553.543	631.2	110.542	163.194	107.913	198.831	218.469	247.78	243.557	107.075	194.233	267.616	92.5119	229.729	62.971	183.778	72.6746	455.686	265.823	138.918	0.307881	256.577	213.438	1.20212	0.609753	91.033	106.642	0.85363	0.134776	198.009	137.551	1.43953	0.75575
O35744	CHIL3	0.0188037	0.00525735	2.32647	0.324472	0.417914	410.108	239.052	1457.55	188.606	639.214	129.23	10.5968	391.515	24.618	11.8898	70.1141	107.758	16.1687	9.78247	640.058	17.9967	12.2006	98.4273	2.72969	278.343	75.8567	45.8659	792.694	29.3515	189.87	57.0313	1060.55	218.869	50.159	32.6203	0.915039	26.2508	23.8836	1.09911	0.0305826	831.099	286.576	2.9001	0.781897	22.0567	19.5238	1.12973	0.371977
O55229	CHKB	-0.0734127	-0.00203495	0.01461	0.474222	0.000311888	523.952	420.828	542.468	477.809	562.752	434.312	267.034	166.795	202.876	204.077	169.745	169.367	279.268	264.425	124.952	173.253	171.002	125.701	265.026	132.378	121.271	105.012	211.269	360.519	212.283	328.164	215.909	576.691	333.077	331.92	0.8988	257.788	265.756	0.970018	0.737329	184.043	170.485	1.07953	0.513655	244.799	291.871	0.838723	0.383828
P70232	CHL1	0.0127655	-2.01261	-0.0371602	0.00744139	-0.116915	475.616	440.107	475.041	510.008	560.361	473.716	307.936	54.5751	194.757	502.776	121.174	114.582	198.222	146.693	30.8701	330.649	180.992	115.004	499.025	16.4069	130.958	97.128	19.6394	145.308	21.3829	466.244	26.6784	118.877	310.948	147.698	0.000628504	316.511	489.349	0.6468	0.718634	25.7293	30.7883	0.835684	0.695619	173.686	164.205	1.05774	0.715711
Q9QXG2	CHM	0.586106	0.147134	0.114799	-0.753622	0.139168	490.646	558.284	508.448	445.898	449.37	503.293	163.506	186.898	207.422	106.33	100.624	111.945	165.533	170.687	230.55	183.96	277.22	96.1961	167.306	220.748	135.919	139.196	327.13	344.946	291.927	149.248	274.721	63.8985	157.706	194.899	0.266935	168.391	140.961	1.19459	0.348563	277.467	233.191	1.18987	0.122742	276.53	177.04	1.56196	0.0476428
Q921W0	CHMP1A	-1.58344	-0.389591	-0.238489	-0.000274082								164.897	277.058	237.178	687.26	102.71	108.76	264.398	416.561	161.79	227.064	119.123	83.7659	102.245	182.309	74.6435	65.8359	190.168	80.496	331.623	197.917	239.752	59.9955	71.8799	313.164	0.439125	154.614	329.14	0.46975	0.269462	197.237	263.663	0.748064	0.0462819	145.599	331.375	0.439378	0.961587
Q8BJF9	CHMP2B	-0.0124784	-0.000183903	-0.0581738	-0.0310275	-0.185633	367.938	577.767	302.835	539.541	410.292	678.214	270.467	112.701	217.392	301.35	151.278	100.031	334.324	223.293	156.863	337.085	335.105	3.61838	377.041	162.034	89.4161	60.5304	60.3643	92.1254	82.5293	152.85	78.0975	51.2876	215.154	153.035	0.971963	274.235	277.08	0.989732	0.614073	98.4416	119.088	0.826628	0.815279	214.874	236.884	0.907085	0.773278
Q9CQ10	CHMP3	0.188074	-0.211483	0.00187716	3.16e-06	0.00713484	498.152	542.002	455.303	485.134	446.147	520.418	238.765	145.054	183.761	220.352	117.317	135.151	216.362	184.139	205.618	200.66	236.478	91.7766	227.243	137.001	102.545	66.7687	92.6245	320.866	84.5644	423.99	82.2847	95.7383	191.384	176.238	0.352045	210.27	290.528	0.723751	0.922686	126.842	122.206	1.03793	0.302073	247.035	192.246	1.28499	0.995819
Q9D8B3	CHMP4B	-1.05675	-0.441266	-0.0105123	-0.0148179	0.0116671	484.968	553.847	468.601	468.82	409.776	559.069	164.524	242.615	251.312	1182.42	259.307	164.337	380.258	1149.67	400.393	408.485	177.753	627.464	438.049	528.872	501.357	568.581	289.416	112.446	258.434	161.792	260.212	212.156	246.571	302.869	0.403902	273.193	594.086	0.459855	0.812394	316.674	343.307	0.922422	0.250742	180.504	610.931	0.295457	0.815777
Q9D7S9	CHMP5	-0.0441873	7.94e-05	0.00215505	0.0242423	-0.122665	520.476	434.618	429.677	542.86	492.037	520.274	250.538	384.046	281.338	267.719	892.841	802.644	197.378	148.408	236.262	117.516	168.549	247.173	83.3635	240.966	352.59	235.979	485.795	165.544	681.305	382.08	639.874	482.88	371.613	386.609	0.985743	246.555	244.388	1.00887	0.920812	453.977	435.439	1.04257	0.666763	205.144	244.131	0.8403	0.777878
Q9D1P4	CHORDC1	1.14343	1.53858	-0.107593	0.00564848	0.063182	492.113	502.414	520.151	462.952	499.527	476.671	177.801	281.09	187.262	79.5298	168.212	145.033	160.049	109.837	290.278	184.458	250.414	143.103	139.849	366.178	163.671	215.825	224.177	221.04	225.732	97.0093	215.637	238.451	225.451	134.199	0.0189605	195.903	105.463	1.85756	0.382662	243.364	291	0.836303	0.0238837	219.572	134.695	1.63014	0.825434
P61022	CHP1	-0.107626	-0.0192541	-0.074742	-0.084148	0.00977346	530.211	549.279	429.496	482.548	422.235	540.589	161.68	231.368	206.116	223.744	126.418	137.157	240.143	366.879	60.9995	192.725	240.142	106.26	173.585	60.3984	114.843	135.956	123.33	282.322	108.541	203.673	125.65	118.41	211.499	260.91	0.600077	188.635	200.334	0.941602	0.627209	103.326	133.436	0.774353	0.374755	242.86	289.31	0.839445	0.260544
Q9D869	CHP2	0.0129276	-0.0215274	-3.37e-06	-0.0793271								195.824	53.861	234.696	197.243	123.365	95.9576	283.019	269.852	384.669	233.142	228.935	252.145	232.114	404.348	259.511	363.377	83.9602	336.369	76.8695	228.29	65.1225	188.458	193.935	197.286	0.531019	207.634	219.216	0.947165	0.997838	177.917	178.36	0.99752	0.725617	266.667	250.052	1.06644	0.593467
Q9CY57	CHTOP	0.132718	0.593391	-0.0739692	0.646541	-0.171543	477.263	464.194	452.05	522.528	533.119	483.853	140.806	513.427	148.323	131.886	298.322	191.362	91.2867	102.8	971.949	330.312	168.421	328.402	147.569	1221.85	215.38	285.275	278.036	53.7769	321.169	153.708	297.958	464.446	300.46	84.2185	0.193892	257.192	144.388	1.78126	0.659932	515.981	685.482	0.752728	0.477047	123.507	92.7683	1.33135	0.103732
E9QNL4	CHUK	-0.428136	-0.166974	-0.147625	-0.133482	-0.26772	460.011	480.659	427.65	528.681	499.598	526.7	196.987	277.754	193.131	268.098	144.818	128.148	215.431	221.648	244.441	194.773	184.44	166.755	285.445	281.133	194.854	151.768	227.872	157.545	370.101	141.251	305.84	58.4177	142.212	300.401	0.363405	177.991	231.598	0.768531	0.264513	259.384	309.663	0.837636	0.118797	178.372	245.827	0.725601	0.42555
Q99KN2	CIAO1	0.0851366	-0.145295	-0.0666841	0.202412	0.00108303	467.401	489.57	521.535	521.798	478.775	463.013	101.532	165.312	190.754	176.371	66.481	42.3077	198.001	177.445	212.636	224.652	341.691	87.3418	339.3	262.042	173.905	103.357	174.675	128.441	210.831	156.788	170.515	398.171	174.43	150.069	0.455756	166.871	224.153	0.744451	0.453468	185.942	212.728	0.874083	0.552755	220.295	175.172	1.2576	0.553736
F8WIK0	CIAPIN1	-0.0290644	0.0799613	0.0634679	0.0225368	0.15791	516.031	548.782	511.224	426.495	445.724	516.495	68.56	122.602	217.501	118.058	267.523	185.779	179.214	241.917	165.019	112.933	13.1735	2238.39	36.8497	315.292	1331.18	1661.49	525.511	417.598	456.735	224.234	427.324	1246.57	337.882	351.543	0.666635	173.125	126.381	1.36987	0.634612	372.618	298.21	1.24952	0.767784	216.091	257.558	0.838998	0.80521
P60824	CIRBP	-0.00104116	0.0386781	-0.337246	0.26678	-0.602783	470.438	403.007	371.375	553.917	546.316	565.398	244.785	456.82	162.4	234.12	47.944	102.847	132.918	129.843	404.136	117.527	102.611	102.179	137.469	451.546	108.769	59.1927	309.921	115.757	373.236	76.4647	290.167	349.416	164.146	124.886	0.681939	175.486	149.352	1.17499	0.110041	334.741	427.201	0.783569	0.911369	126.923	129.216	0.982254	0.498862
Q91WS0	CISD1	-0.272029	-0.311023	-0.115685	-0.0306736	-0.00376997	491.521	520.62	441.828	522.349	451.16	512.249	225.514	107.476	180.822	337.143	1238.38	1469.73	183.471	197.183	69.0937	217.426	117.028	684.578	272.107	73.8412	599.36	564.095	71.8473	152.374	73.3682	290.969	72.7276	297.875	281.086	189.123	0.102383	241.342	300.073	0.804277	0.349433	71.2229	84.8951	0.838951	0.158251	150.074	189.926	0.790174	0.750175
Q9CQB5	CISD2	0.000501644	0.116587	-0.000962352	-0.0727366	0.00179155	521.034	481.959	481.69	504.318	480.385	484.803	141.468	242.472	165.868	157.095	167.879	152.413	162.943	169.711	184.405	162.533	106.309	257.476	114.323	207.049	326.845	264.205	248.192	284.807	199.699	182.733	207.307	194.965	265.301	214.383	0.438929	189.767	151.384	1.25355	0.899181	213.301	216.407	0.985651	0.956544	185.662	182.346	1.01818	0.526721
B1AR13	CISD3	0.0398085	-0.691168	-0.517689	-0.027966	-0.30429	444.34	459.891	448.078	540.858	490.751	534.516	153.305	92.2544	169.634	375.588	131.997	164.804	201.178	354.684	16.0747	363.43	294.632	114.067	419.491	6.1401	112.568	90.0077	6.94803	351.018	12.5933	447.251	14.2587	83.6607	243.045	142.488	0.106094	253.26	414.11	0.611577	0.468892	12.4272	36.9959	0.335906	0.663388	271.761	232.783	1.16744	0.661822
Q8BMK4	CKAP4	0.232669	0.329093	-0.000566178	-0.0168933	0.121397	520.238	556.617	478.16	494.029	457.104	454.439	502.966	147.612	324.252	213.408	297.965	209.438	200.761	107.147	194.954	336.711	211.602	230.5	201.516	238.571	237.917	212.863	183.669	157.14	239.625	188.602	238.404	64.4895	145.751	188.248	0.342563	328.476	201.176	1.63278	0.938049	205.676	208.602	0.98597	0.329105	230.998	165.385	1.39673	0.778081
K3W4R5	CKAP5	0.150778	0.0170705	-0.0150294	-0.171847	-0.000223025	515.16	469.165	489.379	490.628	514.145	474.884	193.127	194.545	199.535	180.12	201.81	238.11	170.835	184.011	222.629	185.017	181.762	114.749	166.164	219.176	173.467	163.507	147.383	188.985	136.681	164.696	140.231	137.342	156.976	138.931	0.554203	178.373	170.327	1.04724	0.72861	170.081	183.467	0.927037	0.188131	190.094	164.593	1.15494	0.313788
Q04447	CKB	0.353605	0.00504125	0.243454	0.287152	0.00790114	527.762	476.444	493.678	486.371	513.446	461.709	417.613	54.7258	249.198	364.715	230.512	213.817	215.178	181.436	61.3771	366.177	242.115	208.069	451.273	47.7653	145.986	160.343	53.3638	218.136	45.5821	308.781	58.4203	220.536	380.112	195.083	0.790363	387.967	374.923	1.03479	0.0835298	57.7204	49.3577	1.16943	0.0446222	236.483	197.232	1.19901	0.144355
P07310	CKM	-0.0576989	-0.288688	-0.0591792	0.370531	0.117761	608.565	493.57	493.189	507.746	482.608	402.965	110.868	11.9174	56.8092	170.242	2019.98	1856.76	55.0575	42.8853	14.4465	101.201	38.0168	1893.97	128.765	25.06	1379.34	1605.95	12.0054	38.9024	9.77479	252.52	11.9209	2170.79	173.075	53.2564	0.277152	128.381	183.842	0.698325	0.619895	12.7909	15.5841	0.82077	0.472371	44.5761	50.3997	0.884452	0.0751154
P30275	CKMT1	-0.259317	-2.11371	-0.0928602	0.103261	-0.556136	466.244	436.454	411.597	544.381	556.115	504.892	313.89	25.9021	139.332	492.499	257.007	303.024	183.6	225.423	17.1575	310.439	204.093	202.523	536.89	16.9057	182.178	179.622	14.4791	164.472	14.4812	480.132	15.9251	358.466	243.964	224.57	0.0022423	289.431	503.173	0.575212	0.450919	15.8539	19.0963	0.830206	0.153867	169.299	211.198	0.801615	0.451634
Q6P8J7	CKMT2	-0.284812	-0.207687	-0.294423	0.779825								40.2589	11.8455	26.2967	41.807	2197.63	1709.94	30.6182	29.2533	15.2693	38.1208	21.9486	2675.87	57.5258	33.9847	1915.45	1705.74	7.99101	14.4955	7.00005	37.5879	6.05546	2616.24	29.3238	22.9235	0.251321	35.9011	45.6402	0.786612	0.45029	9.77191	17.6101	0.554905	0.194187	20.9136	27.5984	0.757785	0.0257075
E9QKH0	CLASP1	0.258643	-0.0229556	0.37224	-0.125551								214.522	125.878	197.158	174.898	619.625	612.673	182.038	178.61	167.362	183.46	287.265	368.643	241.57	144.754	600.177	458.391	156.133	232.06	146.629	248.846	175.619	382.388	221.229	201.495	0.600381	206.404	221.771	0.930706	0.0362697	166.371	139.087	1.19617	0.182393	238.828	187.381	1.27456	0.363991
F7DCH5	CLASP2	-0.103239	0.227436	-0.187727	-0.0447773								231.345	373.486	207.284	174.939	377.337	387.779	216.55	171.564	251.754	159.617	87.7518	328.678	126.819	287.227	315.926	358.252	210.944	114.376	218.401	129.126	226.593	258.774	162.002	125.679	0.233365	184.321	143.628	1.28333	0.291791	229.763	293.038	0.784074	0.48405	136.471	171.264	0.796845	0.474851
A0A1L1ST22	CLASP2	-0.0232103	0.313184	-0.172147	-0.0563433								203.333	337.241	181.295	153.63	232.064	287.003	189.569	153.735	275.791	193.995	115.832	302.88	130.987	323.953	260.372	282.923	199.338	122.302	187.725	153.665	185.503	212.759	154.088	116.822	0.113403	183.805	146.094	1.25813	0.334325	220.21	282.973	0.778203	0.670301	139.81	153.375	0.911554	0.423904
Q9D7Z6	CLCA1	-0.000271759	3.60987	-0.00585908	0.90628								838.65	24.2401	155.582	315.082	102.86	86.1636	113.456	174.073	7.77856	750.427	135.594	111.049	273.641	9.34347	52.7673	45.9766	12.7687	131.495	13.2321	205.609	23.0901	100.581	647.736	138.902	0.00382964	745.604	264.778	2.81596	0.87545	14.5458	15.6052	0.932113	0.952203	140.89	142.144	0.991183	0.0656425
Q9QX15	CLCA3A1	-0.710685	-0.330009	0.454607	0.0323937								99.9713	343.942	196.141	110.241	163.593	99.1403	190.004	187.584	515.119	47.9723	69.8638	149.032	80.7037	302.295	99.7014	90.7036	395.242	120.306	426.776	102.775	578.992	28.2785	61.5778	312.215	0.210298	69.8405	97.9064	0.713339	0.109375	496.451	357.671	1.38801	0.14136	128.77	229.934	0.560031	0.728605
E9PUL3	CLCA3B	-0.106298	0.00118833	0.116622	-0.00130726								171.278	197.154	272.86	162.11	273.53	174.339	237.919	264.885	47.022	211.795	287.473	420.959	164.665	27.426	278.141	290.889	337.106	129.453	392.194	110.747	518.34	21.3994	66.9653	344.204	0.934968	150.013	145.841	1.02861	0.613233	300.823	205.591	1.46321	0.437683	229.929	282.336	0.81438	0.946116
G3X8Z1	CLCA4A	0.0533313	-0.173402	0.253496	0.00353204								102.418	10.5686	278.375	149.296	113.61	125.315	337.842	419.26	55.0266	219.946	551.26	165.805	288.901	40.8621	124.035	128.368	29.3296	494.521	26.3155	162.174	30.9446	110.673	117.855	389.026	0.409851	146.74	200.124	0.733244	0.358216	38.4336	25.9154	1.48304	0.554592	441.385	382.043	1.15533	0.839512
Q3UW98	CLCA4B	0.037568	-0.676768	0.3234	-0.000164103								78.9101	12.702	283.602	140.353	132.693	145.403	333.686	422.327	19.7301	111.502	507.251	217.074	140.752	17.3961	137.63	196.853	30.6954	500.933	27.33	146.49	31.2755	125.957	108.314	394.369	0.0492064	99.5755	142.531	0.698622	0.231277	27.2337	19.1427	1.42267	0.596191	430.595	383.46	1.12292	0.970369
Q61418	CLCN4	0.283166	0.139373	-0.0428842	-0.85242	-0.17664	464.323	442.941	470.49	551.424	518.779	480.285	234.74	271.999	229.286	281.761	113.902	144.361	144.623	231.156	164.368	265.88	215.284	2.44705	233.941	165.433	220.545	204.724	220.81	260.619	335.564	247.523	286.857	158.039	503.713	172.427	0.444734	334.778	254.408	1.31591	0.613232	224.011	257.665	0.869389	0.166171	235.063	182.735	1.28636	0.155277
Q9Z0G9	CLDN3	0.131698	-0.0389075	-0.00226798	0.452758								122.435	66.485	441.696	201.272	338.763	330.471	208.193	250.57	2.61891	332.39	222.934	9.17252	331.601	2.42451	15.9798	14.0229	52.2384	308.708	40.7673	171.738	48.753	487.745	141.687	310.8	0.688766	198.837	234.87	0.846583	0.938366	34.5368	36.5589	0.944688	0.408694	324.446	256.521	1.26479	0.423412
Q9Z261	CLDN7	0.314204	-0.150678	-0.578528	0.0135798								230.359	24.2765	477.609	262.164	158.861	176.528	237.094	377.547	7.23638	311.586	317.9	77.5988	451.448	16.109	49.1711	52.352	4.66046	367.153	4.86569	220.775	9.50846	76.1401	165.124	240.229	0.422024	235.69	311.462	0.75672	0.291286	7.1351	15.0837	0.473033	0.195787	387.554	284.957	1.36005	0.831055
Q91V08	CLEC2D	0.046581	0.0031502	-0.184717	-0.149733								203.257	370.15	264.255	187.665	166.63	163.727	236.781	263.697	349.137	155.241	247.05	352.275	132.531	395.306	257.823	361.185	328.567	196.191	413.576	126.056	373.24	24.6462	105.049	114.906	0.876143	154.516	148.751	1.03876	0.0770373	350.315	393.011	0.891361	0.586846	235.832	205.128	1.14968	0.519272
Q9Z1Q5	CLIC1	0.0817452	0.109175	3.7e-06	-0.001502	0.000235691	519.73	437.412	528.106	480.017	567.381	427.393	183.638	352.398	145.373	139.716	84.7529	92.1505	117.252	103.055	435.105	112.117	79.4012	165.367	103.77	318.531	154.732	177.501	259.132	189.084	301.46	163.139	279.327	162.365	199.923	118.997	0.414835	165.226	135.542	1.21901	0.995119	324.521	324.13	1.00121	0.518482	137.953	113.101	1.21973	0.919159
Q9QYB1	CLIC4	0.654059	0.0451548	0.00984473	-0.0243305	0.245053	500.756	517.741	537.103	454.795	471.754	478.5	115.586	343.822	129.456	126.194	181.306	231.5	116.992	99.345	363.707	124.128	136.302	303.219	157.047	246.129	340.044	249.885	249.1	142.101	243.996	116.652	269.345	265.308	223.611	98.9451	0.612937	154.442	133.298	1.15862	0.756079	294.051	277.982	1.0578	0.0173406	135.953	105.094	1.29363	0.653238
Q8BXK9	CLIC5	0.0434474	-0.17231	-0.00181446	0.00151184	0.00520431	546.595	431.936	532.428	469.763	575.448	414.082	148.125	88.1596	310.742	125.409	218.979	241.608	410.406	236.703	70.4275	104.244	380.276	118.416	211.393	78.2023	135.932	152.668	88.9084	484.689	71.7167	159.361	74.4034	207.908	140.17	391.069	0.309156	130.846	165.388	0.791148	0.854329	77.9131	79.3595	0.981774	0.572689	391.902	346.059	1.13247	0.917641
Q5SUH6	CLINT1	0.125689	0.569693	0.0928991	-0.00877472	-0.0367027	466.867	489.672	482.782	489.037	522.291	486.761	277.929	118.01	227.651	193.744	153.624	168.841	251.197	150.067	242.701	284.149	221.379	163.177	231.233	213.969	135.441	125.372	196.059	249.904	210.67	251.086	203.204	88.8486	326.959	182.857	0.0361452	296.346	225.354	1.31502	0.413869	213.988	180.883	1.18302	0.326972	232.978	194.707	1.19656	0.783804
F8WIA1	CLIP1	0.207656	0.000187366	-0.072035	0.000189661	0.0179182	507.75	510.923	479.298	474.941	504.833	475.652	204.686	233.692	133.565	213.439	777.818	717.118	144.821	108.092	131.825	231.674	226.477	571.59	278.993	148.013	485.937	465.24	173.431	124.849	160.068	180.14	161.484	336.367	241.255	106.822	0.960754	225.872	224.191	1.0075	0.462444	155.58	180.591	0.861506	0.329527	161.63	119.912	1.34791	0.971375
Q9Z0H8	CLIP2	0.0257812	0.00379607	-0.0589126	-0.0171408	0.00409691	501.695	499.25	486.942	489.784	515.191	458.468	204.551	160.561	201.081	158.355	273.043	198.266	278.294	298.752	192.465	296.772	312.815	347.946	256.724	198.68	329.171	318.49	89.4765	365.602	89.1977	255.058	88.6021	149.829	195.444	221.715	0.856008	232.256	223.379	1.03974	0.610914	123.514	149.479	0.826297	0.652246	293.166	266.254	1.10108	0.745109
Q923F1	CLNS1A	-0.374879	-0.0517774	-0.0363325	-0.156406	-0.198467	391.125	623.415	206.564	573.554	516.166	565.355	136.781	267.846	221.023	208.599	186.627	153.689	237.461	274.632	225.509	195.745	217.971	256.484	170.204	199.912	239.018	298.524	226.68	122.439	302.814	136.364	250.222	67.8418	119.011	259.769	0.534279	150.512	171.722	0.876487	0.534659	234.137	256.857	0.911546	0.152642	187.145	257.287	0.727375	0.437778
Q99LI9	CLP1	-0.00346632	-0.0662042	-0.123825	0.0195344								85.9129	267.046	157.814	249.147	72.1861	33.8312	171.049	296.504	306.008	267.294	292.692	872.953	281.059	341.628	547.346	361.706	210.662	214.969	282.815	269.338	242.715	185.869	308.538	225.387	0.572013	220.581	266.514	0.827654	0.291645	253.128	297.163	0.851817	0.872146	221.825	230.98	0.960365	0.842502
Q60649	CLPB	-0.00401194	-0.0558204	0.0569021	-0.216196								188.73	113.242	158.53	210.546	521.388	428.683	166.995	157.893	156.712	247.108	171.623	648.581	319.402	150.259	909.965	869.421	154.395	208.38	177.845	272.892	184.235	446.675	273.785	232.777	0.485859	236.541	267.613	0.88389	0.455279	165.114	147.115	1.12234	0.832421	179.511	185.889	0.965692	0.330623
O88696	CLPP	-0.0266586	0.285657	0.096418	0.126465	-0.0114335	496.837	486.251	476.962	490.743	507.631	487.881	226.264	147.96	96.801	203.064	729.903	742.013	95.5874	89.4807	168.546	275.911	41.0409	490.983	180.336	193.695	550.37	496.938	237.729	130.405	203.585	272.028	225.745	1061.67	423.35	118.097	0.266809	308.508	218.476	1.41209	0.352775	210.673	181.747	1.15916	0.706312	89.4157	101.055	0.884821	0.436459
Q8VBZ3	CLPTM1	0.0531157	-0.00126194	0.0278203	-4.61e-05	-0.000446275	444.81	515.587	501.524	511.512	484.703	475.625	120.835	104.388	177.663	123.401	363.535	449.46	176.88	201.293	119.492	218.868	304.451	25.1392	215.832	108.371	101.343	85.2191	124.198	318.612	137.414	223.758	131.073	241.984	209.378	310.17	0.92265	183.027	187.664	0.975292	0.519857	124.921	116.724	1.07023	0.57089	266.909	229.448	1.16327	0.991344
Q9JHS4	CLPX	-0.25972	-0.0373913	-0.359437	0.654072	-0.0659947	494.277	475.77	454.26	532.25	483.897	498.489	121.317	246.866	203.766	241.898	141.513	175.634	216.25	318.855	110.558	206.456	155.98	394.165	169.473	140.408	557.121	440.726	87.5403	44.7576	87.2745	76.2896	90.26	4023.11	84.8647	97.7872	0.699604	137.546	162.554	0.846156	0.316136	96.1196	158.183	0.607648	0.39613	134.834	210.964	0.639134	0.463366
Q6PFA2	CLTA	-0.366956	-0.0152777	-0.218597	-0.0642833	-0.0337199	444.164	530.549	430.78	553.024	538.286	427.311	183.515	337.862	221.739	418.949	239.035	389.932	260.987	539.684	162.442	281.899	148.582	336.485	143.403	177.047	250.679	235.921	156.918	182.324	176.628	176.654	177.048	163.326	196.424	162.745	0.801638	220.613	246.335	0.89558	0.3491	165.47	230.512	0.717834	0.348607	184.215	321.139	0.573632	0.548595
Q6IRU5	CLTB	-0.898937	-0.751369	-0.0824831	0.246727	-0.396407	451.216	451.996	332.529	584.33	641.352	443.157	214.448	103.433	161.306	411.418	137.692	125.732	218.886	266.13	119.996	221.686	148.591	61.5556	232.199	133.561	43.7087	12.0252	68.9997	146.887	90.7079	474.757	89.2602	90.4319	172.798	387.685	0.139091	202.977	372.791	0.544479	0.447149	92.7521	109.234	0.849113	0.109023	152.261	290.9	0.523413	0.430869
Q5SXR6	CLTC	-0.151108	-0.18836	0.0450062	0.000718005	-0.00456899	450.922	533.358	462.469	506.084	447.715	529.656	180.498	184.636	197.878	213.48	177.951	187.053	200.21	265.451	235.146	182.879	193.078	121.528	200.081	198.688	141.024	133.078	194.293	234.319	207.833	196.438	205.658	168.739	189.517	276.153	0.0469561	184.298	203.333	0.906385	0.367176	211.699	197.053	1.07433	0.243865	208.425	247.271	0.8429	0.927369
Q06890	CLU	-0.0467449	-0.0772082	-0.188049	-0.00658135	0.0474563	492.907	531.02	510.639	497.839	515.071	407.847	122.007	272.588	166.867	119.988	930.747	805.965	163.182	142.299	12.9463	72.5033	111.214	1416.81	109.67	41.3722	1342.52	1398.07	136.077	87.8457	121.352	105.902	121.912	1019.66	97.0955	112.496	0.415736	97.202	111.853	0.869014	0.531027	90.3116	145.104	0.622392	0.570646	121.976	139.326	0.875473	0.816748
A0A0R4J140	CLUH	0.309488	0.0463207	0.0116384	0.0152755	0.00967916	512.853	467.718	520.576	484.266	520.506	452.016	203.517	68.5133	324.107	158.714	455.2	406.737	255.536	246.571	57.4781	210.472	358.307	217.08	218.966	49.2981	308.01	279.39	70.1929	315.457	82.614	203.586	85.9333	408.911	220.67	314.299	0.431168	211.553	193.755	1.09186	0.747006	71.2014	66.8085	1.06575	0.08535	332.624	272.135	1.22227	0.747936
Q8R4N0	CLYBL	-1.07629	-0.0275398	-0.0079558	-0.113368	-0.0891274	488.876	481.059	445.976	532.898	489.838	497.703	274.003	66.0965	98.7227	363.795	1074.06	1205.1	118.294	145.383	48.2133	258.741	80.6971	658.762	267.762	46.45	955.63	675.115	52.5934	87.582	46.2346	281.572	50.9029	535.047	313.687	146.763	0.560184	282.143	304.377	0.926955	0.756754	50.5699	52.927	0.955465	0.0184057	89.0006	136.813	0.650525	0.445052
A0A0R4J0B4	CMAS	-0.0407375	-0.106562	0.00515878	0.133173	0.00878307	513.791	448.641	543.763	474.157	531.912	448.452	329.708	117.687	216.267	616.839	98.5063	110.785	174.254	281.75	113.278	335.008	166.162	55.4441	278.824	74.6861	60.8359	43.8759	84.7103	200.528	96.144	357.827	102.089	132.669	327.361	197.114	0.483272	330.692	417.83	0.791452	0.81092	100.026	96.1724	1.04007	0.564327	194.319	217.706	0.892575	0.474625
Q8R1G2	CMBL	-2.06108	-0.447919	0.176509	-0.0119633	-0.0957884	426.335	544.931	375.66	551.427	431.058	577.26	174.869	112.418	241.206	465.541	472.781	655.929	403.468	803.996	132.457	175.141	270.918	58.8043	200.458	64.6998	54.5994	55.9075	124.084	106.358	161.762	128.188	191.161	123.814	59.6997	694.841	0.339559	136.57	264.729	0.515886	0.363632	149.234	112.96	1.32112	0.0535145	206.161	634.102	0.325122	0.885147
Q9DBP5	CMPK1	-0.258131	0.475501	-0.257605	0.0497677	0.235885	539.391	511.018	507.024	477.443	479.692	453.968	434.701	98.4153	132.985	400.544	91.1715	122.767	147.539	151.632	84.1357	393.633	97.9555	157.843	288.192	87.0484	125.682	118.788	72.1503	99.8689	89.2852	242.23	80.4541	170.71	471.923	115.194	0.103151	433.419	310.322	1.39668	0.0632087	78.9134	91.583	0.86166	0.16051	110.27	138.122	0.798354	0.551788
Q3U5Q7	CMPK2	-1.48174	-0.774112	-0.0582665	-0.565369	-0.0215017	461.691	522.603	448.687	494.719	478.4	525.702	89.4907	341.29	114.229	130.601	263.618	286.15	216.334	258.702	300.713	104.642	121.341	229.632	155.864	294.163	293.627	350.604	299.341	133.562	307.953	136.969	279.247	62.0937	113.724	337.399	0.0207347	102.619	141.145	0.727048	0.266725	293.1	314.468	0.93205	0.0498967	123.044	270.811	0.454353	0.173999
Q9DBC3	CMTR1	-0.294585	-0.118408	-0.0639106	-0.0695153	-0.0193334	471.897	485.888	494.494	490.597	509.871	487.611	122.827	356.159	162.33	219.77	112.086	108.985	167.778	199.879	469.654	176.118	164.816	165.378	165.836	458.61	312.62	267.596	273.934	141.046	385.593	137.853	295.157	277.113	134.592	191.835	0.366902	144.512	174.486	0.828216	0.493925	346.249	400.121	0.86536	0.0714206	156.064	186.497	0.836817	0.600189
E9QLJ0	CMYA5	0.000106944	-0.465945	-0.0245617	0.359083								11.3402	11.0275	15.8276	22.6899	1619.05	1829.88	12.9806	14.014	27.5439	46.0675	45.4645	1653.91	68.0586	37.9972	1501.71	1337.79	12.7243	30.3132	11.5066	48.87	11.1466	5443.08	19.6895	63.5238	0.285853	25.6991	46.5395	0.552199	0.786509	17.1383	20.1771	0.849391	0.9858	30.5351	30.1728	1.01201	0.399222
Q9D1A2	CNDP2	-1.08014	-0.88559	-0.042953	-0.000207436	-0.114667	490.196	473.184	463.059	495.216	504.125	514.256	80.5365	118.685	233.371	113.327	146.296	141.947	378.955	560.038	95.4605	72.5018	276.876	40.9592	115.871	91.8639	66.9911	74.2616	92.2467	302.624	108.931	90.5274	107.091	92.166	61.8601	658.745	0.0285074	71.6328	106.575	0.672133	0.426282	98.2662	106.493	0.922746	0.0779995	270.957	532.579	0.508764	0.975653
Q8BMA3	CNKSR3	-1.2508	-0.354665	-0.00102847	-0.122011								147.318	266.76	200.74	407.568	146.677	101.914	199.939	302.476	192.473	209.863	87.7968	629.274	134.524	185.052	616.289	589.435	197.035	122.446	213.337	368.367	263.894	124.101	206.791	303.368	0.306701	187.991	303.486	0.619437	0.911991	217.801	221.716	0.98234	0.0515537	136.994	268.594	0.510042	0.593726
Q08091	CNN1	0.0462697	0.21279	-0.00203746	0.562609								548.197	26.5751	161.109	471.291	72.9458	71.7289	165.377	123.886	31.3377	506.356	172.41	117.203	476.511	39.9088	90.3264	50.884	25.091	120.5	25.2346	391.779	32.8445	246.8	500.376	117.602	0.102467	518.31	446.527	1.16076	0.886617	29.7578	30.5728	0.97334	0.50996	151.34	135.622	1.1159	0.286732
Q08093	CNN2	-0.141815	0.00285486	-0.279776	-0.12215	-0.000401777	418.456	508.007	532.846	478.489	538.856	454.472	118.379	445.584	133.674	125.773	98.4784	111.058	118.027	128.467	447.73	50.1385	81.5456	113.091	63.7902	582.067	104.684	110.649	392.603	46.7593	566.384	58.5789	444.936	56.6894	91	93.4604	0.903342	86.506	82.7141	1.04584	0.125684	428.423	531.345	0.806299	0.419489	87.3264	113.318	0.770631	0.370117
Q9DAW9	CNN3	0.0347272	0.149726	-0.150458	-0.0122298	-0.0194629	484.101	435.62	520.497	501.596	513.347	488.562	206.489	249.087	196.076	132.797	154.792	144.85	224.287	131.594	333.125	252.677	317.736	272.824	225.901	373.431	249.231	248.778	188.941	99.0343	281.435	154.495	193.202	168.168	175.684	168.647	0.325201	211.617	171.065	1.23706	0.358547	238.423	301.318	0.791267	0.700354	204.282	174.842	1.16838	0.773622
Q69ZF7	CNNM4	0.0694356	-0.00841039	0.350665	0.0600789								394.163	18.6362	204.308	434.16	68.5925	78.2166	224.84	240.324	42.782	472.444	252.627	64.3167	481.372	6.51372	79.4295	91.4677	9.10158	255.744	11.1577	369.756	16.3524	176.083	366.815	167.526	0.721892	411.141	428.43	0.959646	0.411873	22.7453	12.1025	1.87938	0.394208	237.56	210.897	1.12643	0.640729
Q8K0V4	CNOT3	0.357374	0.0378885	-0.0214044	0.580435	-0.0399395	501.813	398.407	514.821	521.21	548.874	460.826	200.166	337.379	165.1	149.972	144.703	173.482	169.771	139.192	316.925	210.068	231.221	235.153	255.929	272.883	172.594	157.337	224.517	200.163	225.771	170.509	230.342	979.383	232.258	147.467	0.572838	214.164	192.136	1.11465	0.652322	257.261	278.678	0.923149	0.118683	198.828	152.143	1.30685	0.393502
P16330	CNP	-0.043446	0.0129664	-0.0158582	0.00401585	-0.00775393	498.154	542.269	390.987	566.223	381.243	553.929	156.102	309.917	164.81	136.714	163.427	144.05	164.552	137.316	389.671	35.7334	52.9261	75.2674	41.0944	355.231	82.3388	65.2285	300.291	128.812	390.902	73.4033	309.033	69.7466	89.583	102.879	0.833387	93.8062	83.7373	1.12024	0.634006	332.999	352.017	0.945973	0.639755	115.516	134.916	0.85621	0.892018
Q9QXT0	CNPY2	0.00626079	0.716592	8.28e-05	0.0140531	-0.165339	534.029	369.33	416.682	553.774	639.23	427.143	535.729	157.907	338.586	306.314	196.094	204.887	285.451	268.611	114.643	290.217	218.71	155.787	221.157	106.684	151.651	193.318	149.657	228.829	97.4023	218.038	99.8287	232.998	450.371	195.523	0.119175	425.439	248.503	1.71201	0.977776	121.376	120.665	1.0059	0.810626	262.041	249.862	1.04875	0.695426
Q9DAU1	CNPY3	0.227122	0.0520948	-0.24184	-0.211954	0.00590811	439.389	524.612	524.869	458.351	475.234	514.952	135.509	378.355	210.589	193.553	144.38	151.223	94.767	143.107	230.438	210.102	201.335	137.191	209.503	281.258	181.954	146.9	238.971	80.5481	233.835	122.864	213.318	123.256	265.519	106.688	0.574819	203.71	175.306	1.16202	0.238132	227.576	297.816	0.76415	0.362429	164.157	114.854	1.42927	0.137491
Q9D2R6	COA3	-0.275184	-0.302941	-0.291596	-0.0466075	0.000641598	472.911	582.403	421.9	516.324	383.918	556.745	186.626	103.706	170.004	363.295	252.296	229.919	208.496	340.92	99.8956	429.878	337.889	594.288	536.278	161.143	536.978	400.406	78.0045	150.053	99.3261	222.436	86.7831	103.481	80.4438	400.514	0.362253	232.316	374.003	0.621161	0.232594	88.2277	121.392	0.726803	0.30244	219.315	316.643	0.692626	0.696812
Q99M07	COA5	0.0391834	-0.384713	-0.191579	0.0165616								178.816	150.503	209.8	291.333	217.394	216.52	215.516	226.952	13.8468	205.892	255.234	560.088	596.281	36.6372	279.277	252.885	76.1023	261.579	82.068	174.84	86.0794	80.2823	213.642	234.003	0.343211	199.45	354.151	0.563178	0.486889	58.6761	89.736	0.653875	0.417024	242.204	225.49	1.07412	0.82338
Q921H9	COA7	0.0124771	-0.0260736	0.0140387	0.247908	-0.301083	474	466.224	439.147	523.771	521.532	504.829	190.538	80.5693	254.885	233.898	531.112	456.305	311.646	290.54	66.7018	160.49	227.979	337.486	248.797	81.6068	369.23	327.633	114.286	453.76	86.6197	366.063	85.1824	770.405	397.069	264.035	0.719182	249.366	282.919	0.881402	0.717543	88.7235	82.932	1.06983	0.775039	312.208	288.741	1.08128	0.324516
Q62507	COCH	0.129119	-0.0143454	-0.00346214	0.0335367	-0.0911737	482.669	416.509	490.474	513.462	572.779	461.921	17.1916	610.413	27.6688	16.8789	47.7387	47.1053	16.9507	17.3195	720.07	9.09885	28.9474	122.016	8.59063	514.505	58.7256	95.1268	408.274	71.4708	560.573	80.5861	498.417	64.3477	64.2351	56.1614	0.865363	30.1752	35.3518	0.853567	0.855728	542.254	561.83	0.965156	0.553232	42.6957	30.1439	1.4164	0.704257
Q9Z160	COG1	-0.157678	0.0178666	-0.051774	-0.168691								246.605	162.904	166.31	359.865	134.23	159.287	164.823	214.19	115.39	362.406	192.713	149.053	342.485	119.303	155.585	145.969	119.643	136.447	125.109	296.467	132.8	115.981	476.729	211.344	0.710542	361.913	332.939	1.08703	0.444658	122.611	135.772	0.903066	0.237821	165.157	196.786	0.839272	0.153028
Q921L5	COG2	-0.0178897	0.931916	-0.0147598	0.00495869	0.0172819	574.387	422.511	534.12	486.799	517.257	442.265	330.262	106.512	227.478	296.63	109.186	120.08	179.115	234.218	155.939	352.013	147.367	279.707	217.175	183.258	215.752	298.318	105.87	62.0476	99.7828	145.59	95.5829	284.061	545.195	79.7713	0.0912986	409.157	219.798	1.86151	0.760807	119.13	129.851	0.917437	0.789858	145.631	164.368	0.886003	0.875243
E9QL65	COG3	0.000335161	0.547485	0.00626118	0.019134	0.339408	514.852	521.018	588.768	411.065	444.91	494.083	365.902	145.604	139.364	272.581	131.194	149.235	141.646	140.671	122.059	350.44	191.721	147.694	294.249	118.427	142.859	137.096	165.493	196.868	175.622	290.262	171.317	175.608	429.675	239.163	0.0493949	382.006	285.698	1.3371	0.791675	152.956	146.551	1.04371	0.957558	175.984	173.827	1.01241	0.586791
Q8R1U1	COG4	0.00656159	0.0725927	-0.0497092	0.256089	-0.000900649	514.685	492.367	462.122	463.414	523.079	496.184	371.996	121.835	225.512	261.713	109.43	112.087	216.022	181.935	128.812	354.625	232.714	137.043	361.103	137.818	104.934	88.8119	103.338	146.458	108.201	186.366	103.392	123.086	231.176	180.366	0.503013	319.266	269.727	1.18366	0.421925	111.847	122.618	0.91216	0.790601	201.561	192.775	1.04558	0.115386
Q8C0L8	COG5	0.441435	0.335562	0.000228495	0.244668	0.000120628	507.967	423.02	551.843	461.011	554.001	460.411	508.642	102.305	194.528	178.151	285.824	229.476	205.057	134.056	123.063	171.533	240.604	50.8173	194.411	178.723	84.6677	51.9451	149.702	218.391	140.98	247.434	153.114	262.461	317.956	136.627	0.324738	332.71	206.665	1.6099	0.960853	141.96	140.669	1.00917	0.10872	217.841	158.58	1.3737	0.452577
A0A0R4J0L5	COG6	0.504867	0.106425	-0.0737217	0.0117787	0.0164145	486.32	466.104	555.567	459.14	483.497	502.838	446.737	88.9281	289.798	322.255	162.704	145.984	269.12	201.114	148.855	455.243	301.548	69.9025	443.714	151.475	122.119	90.2241	19.8186	298.57	17.9286	398.292	17.2247	155.342	422.455	105.073	0.267739	441.479	388.087	1.13758	0.699361	61.9662	86.1105	0.719612	0.15768	296.638	191.769	1.54685	0.789238
A0A0R4J0Q9	COG7	0.0789083	0.506636	-0.0367009	5.54e-05	0.0642026	506.824	471.954	564.37	464.439	510.173	445.861	348.56	142.564	188.207	222.119	182.708	179.745	192.454	170.482	59.0718	248.557	187.861	262.397	266.671	78.6031	368.842	291.557	120.371	175.392	108.829	186.334	110.202	400.024	368.251	117.864	0.104234	321.79	225.041	1.42991	0.638194	96.5484	109.999	0.877722	0.399127	183.82	160.267	1.14696	0.985172
Q60847	COL12A1	0.146416	-0.111155	-0.0671503	0.501662	0.0402134	634.059	411.413	551.29	365.214	641.066	403.581	317.908	136.885	254.487	230.872	116.564	105.27	287.434	192.304	104.33	199.289	406.28	82.8425	249.263	105.472	52.1037	60.7928	91.1548	247.282	106.164	354.432	115.855	137.828	156.584	240.852	0.436499	224.594	278.189	0.807342	0.386744	103.78	116.174	0.893315	0.363994	302.683	240.196	1.26015	0.159067
B7ZNH7	COL14A1	0.750968	-0.41215	-0.00538091	-0.0063211								162.3	435.454	138.084	197.149	79.2393	82.9412	105.299	92.9691	471.711	90.8711	150.908	133.928	171.905	401.13	119.548	118.006	306.698	122.602	343.107	165.168	355.89	91.9242	134.532	97.1054	0.12848	129.235	178.074	0.725735	0.803423	378.1	393.23	0.961522	0.0269883	137.198	98.4578	1.39347	0.814793
O35206	COL15A1	0.107129	-0.308044	0.0223882	-0.242368								225.25	75.7026	267.887	202.304	604.578	630.156	259.388	182.604	64.2065	192.022	220.79	822.434	259.307	55.6165	980.198	858.512	67.6419	242.986	57.4852	268.835	69.7166	434.033	148.603	188.94	0.145745	188.625	243.482	0.774698	0.579056	67.1883	62.9347	1.06759	0.315274	243.888	210.311	1.15966	0.254434
E9QPX1	COL18A1	0.806397	0.332268	-0.0137483	0.428761	0.109435	544.746	472.258	542.031	482.159	463.543	466.933	304.62	234.955	178.168	109.54	299.797	250.582	225.714	99.3023	151.387	190.248	283.137	223.584	191.203	109.982	196.014	174.348	125.589	374.202	69.6567	271.466	96.112	376.287	342.29	112.784	0.24816	279.053	190.736	1.46303	0.812194	124.363	138.198	0.899888	0.136495	278.502	145.933	1.90842	0.157931
P11087	COL1A1	-0.0170804	0.014668	-2.38e-05	0.00147797	-0.0428627	397.71	687.153	245.12	522.817	377.505	657.99	218.387	194.847	223.145	293.846	201.603	239.105	210.647	314.492	325.787	393.536	461.759	116.938	181.434	264.125	120.593	93.4992	95.5588	149.075	88.5526	162.181	123.465	149.423	100.331	407.378	0.809758	237.418	212.487	1.11733	0.992402	181.603	182.508	0.995042	0.783409	277.993	310.839	0.894331	0.929072
P08121	COL3A1	-0.00639843	-0.0508683	0.232468	0.46507								93.998	133.645	181.338	623.508	101.643	156.829	210.608	398.359	53.7435	210.939	241.568	94.1	225.001	33.1074	65.8697	15.1083	208.402	388.816	136.296	310.841	206.539	285.608	612.701	254.369	0.70664	305.879	386.45	0.791511	0.427029	156.228	101.016	1.54657	0.847336	270.574	287.779	0.940216	0.349011
Q9EQG9	COL4A3BP	-0.068532	0.076139	-0.122547	0.0154394	-0.175666	474.475	476.323	471.626	498.259	512.296	503.397	293.103	120.163	219.776	239.856	221.085	186.257	210.877	251.644	64.8904	441.611	230.065	360.019	339.504	181.382	322.274	240.429	152.196	346.233	189.337	228.069	170.569	231.643	232.03	522.58	0.50925	322.248	269.143	1.19731	0.436721	129.218	163.627	0.789712	0.598463	265.358	328.367	0.808114	0.739722
Q04857	COL6A1	0.0359692	-0.00483686	0.0661324	-0.174298								247.219	141.183	338.573	213.165	271.488	255.017	306.672	300.312	198.359	79.1351	302.174	283.562	98.7646	132.028	352.603	324.112	115.398	258.591	90.7874	210.785	116.495	220.544	166.163	214.458	0.878338	164.172	174.238	0.942227	0.531957	143.417	121.333	1.18202	0.530651	299.779	273.814	1.09483	0.219438
Q02788	COL6A2	0.446796	-0.00203231	0.0199925	0.297876	0.16046	535.571	458.765	652.969	395.113	566.891	381.183	262.344	145.083	297.166	169.673	264.021	240.451	295.422	176.741	178.087	100.565	415.665	641.637	114.563	149.045	376.3	406.515	117.647	267.474	98.8517	222.681	130.44	621.625	124.716	198.004	0.919801	162.542	168.972	0.961943	0.674697	142.058	130.993	1.08447	0.153369	326.769	223.389	1.46278	0.305108
E9PWQ3	COL6A3	0.880897	-0.100887	0.013068	0.0727422								267.315	175.949	306.882	206.947	237.172	248.634	255.886	194.117	146.363	99.0158	354.889	408.224	185.068	97.8143	408.776	362.181	120.858	292.193	97.1484	224.582	132.288	601.63	121.355	212.648	0.503328	162.562	205.532	0.79093	0.755161	133.17	123.637	1.0771	0.0211005	317.988	220.884	1.43962	0.56182
A2AX52	COL6A4	0.280687	-0.0685256	-0.0545478	0.00203043								130.468	170.764	398.071	87.4196	309.793	355.128	366.893	285.473	181.859	64.2932	538.311	109.384	117.691	176.755	70.046	116.812	117.96	443.698	126.437	82.9581	116.064	150.292	39.5427	427.445	0.588947	78.1011	96.023	0.813359	0.513738	138.628	157.985	0.87747	0.16108	460.027	359.937	1.27808	0.936586
A0A140T8T7	COL6A5	0.0488563	0.0182303	0.132394	0.0037545								101.476	173.971	286.929	70.6156	198.851	156.243	447.73	305.677	260.517	102.706	564.355	10.2379	86.1271	134.511	143.965	149.902	108.179	349.423	74.1982	108.104	142.726	270.685	79.7355	276.279	0.658058	94.639	88.2822	1.07201	0.482562	170.474	127.56	1.33642	0.602015	400.235	343.229	1.16609	0.910384
E9Q6A6	COL6A6	0.17492	0.151002	0.24151	0.174222								87.4927	143.712	267.607	67.5769	871.858	861.767	356.096	241.556	249.267	94.1792	542.373	2.81186	83.9265	128.233	149.725	154.969	114.12	241.574	62.9018	86.7829	127.868	1037.09	92.2229	154.315	0.177201	91.2983	79.4288	1.14944	0.365805	163.752	111.616	1.4671	0.434942	350.518	250.656	1.39841	0.569596
Q8K297	COLGALT1	-0.0270901	0.580802	0.036004	-0.0856147	-0.00530106	589.781	419.626	449.402	500.34	525.788	483.411	188.453	207.001	173.24	138.022	137.118	128.899	186.914	193.556	200.814	151.649	220.04	256.044	97.7591	190.604	209.421	346.602	301.74	142.514	294.016	114.858	267.03	147.968	147.466	199.691	0.0600953	162.523	116.88	1.39051	0.583921	256.528	230.541	1.11272	0.580728	178.598	193.387	0.923526	0.559971
Q8K4M5	COMMD1	-0.00466518	-0.000455881	-0.590338	0.0524214	0.00286275	491.645	457.354	540.024	520.704	485.815	455.194	0.858099	507.352	31.0836	15.5216	530.253	435.286	12.7241	34.5268	198.578	331.777	272.514	54.4332	345.258	213.127	8.99862	9.38074	184.672	128.289	342.54	241.4	204.882	55.7376	254.115	429.721	0.972356	195.584	200.726	0.974379	0.203565	196.044	354.34	0.553265	0.927755	143.962	158.991	0.905477	0.784529
Q8JZY2	COMMD10	0.0837093	0.0334157	0.0544841	0.354575	0.0485074	529.456	441.528	578.189	450.165	503.814	467.776	180.78	140.675	128.559	138.618	210.746	302.075	150.404	121.014	483.208	141.554	125.584	383.951	99.1877	352.637	176.287	262.249	176.2	244.897	147.008	236.48	148.589	608.255	218.323	135.611	0.665515	180.219	158.095	1.13994	0.688069	269.332	213.44	1.26187	0.519155	166.347	135.676	1.22605	0.311396
Q63829	COMMD3	-0.602949	-0.0992754	0.0155359	-0.0711499	0.0379159	451.195	457.203	640.315	427.868	501.752	477.019	122.338	201.978	189.24	237.03	101.406	105.763	179.617	255.684	177.612	172.229	82.7416	354.698	125.531	184.603	265.67	317.338	301.281	195.122	430.495	292.438	429.488	71.2986	228.089	417.372	0.495598	174.219	218.333	0.797949	0.791304	302.794	272.359	1.11175	0.202096	155.701	284.224	0.547811	0.653511
Q8K2Q0	COMMD9	-0.405495	0.27149	-0.0774359	0.536215								185.965	289.082	124.463	240.86	172.296	201.308	175.429	148.411	170.249	426.522	120.146	394.114	182.221	161.909	309.646	268.821	174.084	137.881	149.304	161.689	152.306	1445.74	249.646	150.689	0.327515	287.378	194.924	1.47431	0.521004	165.546	200.098	0.827326	0.0497123	127.497	158.176	0.806042	0.405431
O88587	COMT	0.0172569	-0.0119417	0.0119214	-0.708507	-0.00946188	476.308	459.008	513.01	451.095	516.714	527.07	232.805	119.985	178.22	163.502	271.665	311.723	187.039	168.126	103.054	187.292	213.915	330.175	256.298	83.545	464.161	452.479	107.743	197.633	90.7768	180.645	99.0489	168.999	141.164	206.472	0.753955	187.087	200.148	0.934741	0.690891	103.282	98.1021	1.0528	0.569188	196.589	187.212	1.05009	0.088316
Q8CIE6	COPA	-0.00284248	0.0862566	-0.0264818	0.00273432								266.774	122.421	225.771	249.38	127.052	134.584	220.548	251.081	130.981	310.626	232.248	113.395	228.205	146.593	119.377	118.506	117.416	252.803	122.557	211.913	121.35	139.45	212.475	251.585	0.363156	263.292	229.833	1.14558	0.478547	123.249	130.524	0.944265	0.769129	236.941	241.071	0.982866	0.801756
Q9JIF7	COPB1	0.297026	0.58084	-0.0784665	0.168148	0.0325152	478.411	490.554	542.376	476.657	484.678	478.006	304.383	142.668	207.463	186.142	136.874	130.056	200.185	175.399	116.618	263.221	212.858	103.949	251.461	121.746	106.964	101.971	88.181	290.809	78.4085	221.718	85.3971	197.217	313.348	169.899	0.0408044	293.65	219.773	1.33615	0.471682	96.7319	114.274	0.846489	0.167347	237.043	181.828	1.30367	0.351009
O55029	COPB2	0.0670063	0.0845504	-0.0736897	0.014862	-0.00563451	491.766	486.285	481.538	505.02	512.844	467.696	274.603	149.845	197.364	261.547	214.874	193.82	187.512	211.911	131.533	252.686	226.613	90.7485	197.232	140.406	107.401	104.283	118.96	262.727	119.46	260.361	121.447	141.113	278.66	218.84	0.306028	268.65	239.713	1.12071	0.296413	123.98	136.57	0.907811	0.361085	228.901	206.088	1.1107	0.782737
O89079	COPE	0.365254	0.0710018	-0.149208	-0.156329	0.000500626	517.036	466.976	497.635	479.068	494.181	499.889	277.774	128.44	209.962	204.763	153.84	170.586	216.878	179.018	118.916	316.941	357.566	231.77	311.326	161.773	272.737	203.524	110.187	310.861	108.049	292.25	100.985	122.521	319.993	227.824	0.399851	304.903	269.446	1.13159	0.281289	110.029	132.754	0.828819	0.182205	292.796	207.907	1.40831	0.355686
Q9QZE5	COPG1	-3.34e-05	0.111268	-0.000223799	0.0595486	-0.0248654	524.241	463.683	453.056	501.263	497.176	509.79	285.662	153.274	204.95	229.003	101.961	90.4505	195.618	221.937	94.1908	281.145	225.36	61.3125	240.819	99.2028	97.9271	91.764	166.242	269.495	182.77	287.65	170.215	177.145	285.051	284.45	0.220418	283.953	252.491	1.12461	0.966941	143.549	145.082	0.989431	0.983178	233.268	234.002	0.996865	0.614041
Q9QXK3	COPG2	-0.603779	0.00980505	-0.0209933	0.00502845	0.000118752	526.885	476.367	476.343	503.986	471.978	498.984	152.768	257.934	167.552	245.168	95.1651	89.2709	200.683	230.786	183.737	233.537	125.306	202.765	121.394	224.189	186.19	193.236	249.887	191.036	320.201	223.612	305.43	197.271	244.704	246.765	0.791435	210.336	196.724	1.06919	0.665048	246.351	267.441	0.92114	0.0576017	161.298	226.078	0.713463	0.864245
O88543	COPS3	-0.0792001	-0.0014791	-0.129782	-0.368336	0.053675	500.827	490.026	537.123	464.837	516.732	449.451	180.068	227.271	150.677	226.257	477.894	540.051	164.53	151.134	149.924	153.338	154.484	378.283	202.262	158.571	450.041	530.945	180.83	49.848	251.573	210.869	197.927	243.228	290	118.412	0.91096	207.802	213.129	0.975004	0.330396	176.227	212.472	0.829414	0.533313	118.336	144.692	0.81785	0.163499
O88544	COPS4	-0.0274147	0.0279796	0.00109436	-0.405236	0.138608	502.529	539.414	499.352	464.955	476.442	474.481	211.668	187.643	165.726	174.395	303.46	296.641	173.519	142.429	191.44	214.513	174.905	254.805	202.099	201.956	346.54	343.098	235.661	166.002	296.02	185.531	272.42	81.439	172.411	240.209	0.4924	199.531	187.342	1.06506	0.916665	233.173	228.54	1.02028	0.625531	168.878	185.385	0.910954	0.22449
O35864	COPS5	-0.0292433	0.000159077	-0.284944	-0.0134759	0.187905	490.08	558.62	550.18	427.345	409.315	526.329	126.981	395.686	132.132	149.467	305.984	304.526	121.457	161.73	209.232	179.515	159.283	198.644	153.06	209.982	237.041	241.47	171.752	149.877	234.974	211.728	206.143	231.307	211.824	201.093	0.968257	172.773	171.418	1.0079	0.28166	195.709	280.214	0.698426	0.605262	147.097	161.426	0.911233	0.707024
O88545	COPS6	-0.184295	-0.817232	-0.00690226	-0.149164	0.115589	520.241	487.972	527.341	458.778	481.774	487.001	114.183	220.799	183.559	260.053	172.938	119.355	173.66	225.357	241.257	179.663	198.568	266.71	236.931	243.335	380.512	267.504	221.763	170.055	276.758	202.718	254.67	116.925	169.585	316.385	0.0421768	154.477	233.234	0.662328	0.707345	239.23	246.964	0.968684	0.321156	184.061	238.467	0.77185	0.476517
Q8VBV7	COPS8	-0.00961778	0.0132324	0.0362171	-0.60761	0.203499	522.701	512.863	516.99	481.267	479.537	450.994	162.913	198.03	138.081	163.107	241.554	317.903	142.601	180.665	226.251	222.419	127.435	317.257	192.571	205.789	354.04	459.08	288.163	303.77	299.772	351.478	262.442	200.089	393.894	295.784	0.804436	259.742	235.719	1.10191	0.557926	258.952	234.53	1.10413	0.832627	189.762	206.35	0.919612	0.087998
P61924	COPZ1	-0.00745352	1.19465	-0.215317	0.0154493	0.0681546	490.244	496.005	534.964	467.785	488.785	476.759	307.512	231.928	179.024	176.216	161.039	146.31	164.667	166.451	189.335	218.5	57.1581	280.205	82.7804	293.977	196.855	254.387	173.88	196.992	157.94	194.831	154.19	206.693	364.688	132.711	0.0591476	296.9	151.276	1.96264	0.291667	172.468	227.949	0.756611	0.840313	144.391	154.61	0.93391	0.737424
Q8BGB8	COQ4	0.0529394	0.0482438	-0.00365783	-0.27497	-0.31916	453.609	460.198	469.784	500.995	529.511	513.306	196.288	75.6348	159.85	181.826	328.545	438.168	212.109	157.479	120.762	358.931	205.467	285.848	300.485	134.9	370.08	301.295	72.8014	328.83	65.3847	298.817	69.5915	252.971	344.309	223.383	0.579504	299.843	260.376	1.15158	0.884038	87.7183	91.9731	0.953739	0.584885	231.382	197.657	1.17062	0.168267
Q9CXI0	COQ5	-0.198477	-0.367925	-0.574806	0.0069968	-0.146436	490.881	428.967	443.973	551.743	452.688	561.505	184.711	76.1335	157.161	237.826	975.009	1099.74	176.696	181.282	62.6469	181.082	166.664	980.725	256.152	86.857	1173.64	1104.99	51.1846	136.848	67.9993	199.291	57.4872	1599.48	176.233	173.092	0.0919907	180.675	231.09	0.781841	0.0464302	57.1062	76.9966	0.741672	0.107788	153.558	177.023	0.867443	0.803425
Q8R1S0	COQ6	-0.946779	-0.0931336	-0.0258908	-0.15004	-0.0940119	500.863	464.463	446.626	536.899	501.151	489.286	204.933	122.741	173.97	337.692	986.805	1049.7	214.477	340.963	172.932	86.8703	116.921	1359.92	120.898	166.582	1642.45	1310.5	100.113	167.09	120.549	211.644	96.3696	895.838	228.898	253.375	0.554993	173.567	223.412	0.776893	0.671917	123.138	136.624	0.901293	0.070166	152.66	269.605	0.566237	0.320748
Q60936	COQ8A	-5.13e-05	-0.0876418	-0.0439216	0.0478482	-0.0821136	534.08	422.317	440.035	490.049	504.351	555.829	78.6119	39.5348	56.856	86.2698	1958.12	1849.83	54.7489	76.5666	63.1384	74.461	76.6345	1014.69	88.7809	70.4034	1532.14	1452.48	23.6211	42.7608	26.1003	68.706	25.7613	2715.74	63.1462	45.8136	0.31135	72.073	81.2522	0.887028	0.691193	37.5069	45.3462	0.827125	0.983645	58.7504	59.0431	0.995044	0.625371
Q8K1Z0	COQ9	-0.00362462	-0.0501585	-0.0832173	0.620958	-0.259442	504.198	449.561	356.552	559.52	478.487	574.361	62.4212	52.6056	38.2049	52.2372	1456.36	1479.06	38.8655	37.6776	7.86176	21.7942	20.5163	2558.06	48.3797	25.9523	1528.27	1104.02	41.4102	87.3792	34.6679	155.776	39.5027	3267.12	118.424	78.5557	0.711594	67.5466	85.4644	0.790347	0.579298	29.5916	37.7419	0.78405	0.907745	48.7002	51.6996	0.941983	0.176599
O89053	CORO1A	-0.268054	-0.107552	-0.287314	1.68137	-0.107974	479.907	498.895	406.23	545.137	484.255	513.51	47.4724	724.72	82.3596	96.0801	65.6113	51.4534	70.0396	77.2493	408.435	29.102	50.1091	67.7909	23.3413	438.089	24.6587	30.7122	401.455	50.3624	597.112	58.4255	504.577	90.9271	56.0223	94.0541	0.557308	44.1989	59.2823	0.745567	0.207777	438.156	586.641	0.74689	0.214201	60.9437	80.4476	0.757558	0.026865
Q9WUM3	CORO1B	-0.056529	-0.00585539	-0.043123	-0.00897475	-0.06102	494.055	476.484	459.892	524.687	502.597	482.9	208.785	321.363	179.14	211.254	78.4482	91.593	211.907	173.344	360.283	212.339	176.233	115.774	172.542	332.785	70.9569	86.2615	222.041	151.321	279.559	198.9	254.982	36.906	138.584	170.312	0.792812	186.569	194.232	0.960547	0.531751	279.102	311.236	0.896754	0.375367	168.898	185.188	0.912035	0.823416
Q9WUM4	CORO1C	-0.156962	-0.23483	-0.0170276	0.0360218	0.000738309	517.504	481.935	481.895	507.017	483.053	481.585	292.613	114.018	207.922	375.359	124.566	128.442	233.241	247.297	125.034	277.88	259.145	61.6556	326.814	115.183	55.6312	39.1123	94.1713	188.364	151.786	254.211	137.038	77.4775	163.665	296.282	0.242355	244.72	318.795	0.76764	0.667173	118.748	126.996	0.935053	0.228926	218.477	258.94	0.843736	0.708457
B1AVH5	CORO2A	-0.127061	-0.0561977	-0.171066	-0.0207628	-0.000275805	438.769	514.886	508.022	460.229	464.887	546.19	201.793	83.0899	233.701	292.125	223.796	196.691	264.471	331.563	155.052	465.721	277.334	249.986	638.368	243.033	227.159	266.443	31.3412	166.284	38.8411	175.672	38.8827	167.907	213.448	224.583	0.674343	293.654	368.722	0.796412	0.567855	75.0918	121.655	0.617255	0.347605	225.773	273.539	0.825378	0.635167
Q9D2V7	CORO7	-0.145397	0.00771593	-0.179367	0.938188	-0.059663	486.499	484.725	460.06	511.847	517.248	479.13	117.323	438.608	129.714	102.491	104.531	90.9302	140.443	147.153	458.761	74.9835	44.3831	129.018	49.7311	554.919	74.2031	70.8301	394.557	184.562	464.856	139.151	387.277	149.621	119.434	189.269	0.833386	103.914	97.1245	1.0699	0.170333	413.532	486.128	0.850665	0.442799	119.553	158.955	0.75212	0.045565
Q9CQI6	COTL1	0.003001	-0.345872	-0.173466	-0.0915497	-0.0968177	471.653	455.662	466.289	520.19	556.384	463.092	36.6095	741.804	123.613	145.638	38.2976	39.3037	112.329	183.008	367.061	52.4311	170.845	112.845	137.708	253.251	114.276	103.485	251.397	145.105	255.737	177.972	225.198	45.6226	189.387	130.157	0.335121	92.8091	153.773	0.603547	0.495065	281.219	416.93	0.674498	0.863081	146.521	141.831	1.03306	0.578913
Q6P8I6	COX11	0.00593748	-0.000682139	0.00045147	-0.13434								278.586	121.382	157.033	221.755	484.784	643.247	251.706	195.93	213.714	253.979	257.498	1441.09	352.871	164.279	1569.41	1187.16	64.7834	181.164	53.189	171.894	67.9506	568.693	200.197	116.195	0.943152	244.254	248.84	0.98157	0.968025	115.483	112.95	1.02242	0.841655	198.565	187.944	1.05651	0.500306
P19783	COX4I1	-0.508418	-0.346349	-0.00818434	-0.0197096	-0.021793	458.917	556.863	384.657	590.99	383.773	543.637	191.478	58.9722	178.565	342.361	1057.15	961.358	175.586	232.173	89.091	232.031	158.612	1175.74	225.203	95.3925	1279.24	1056.36	57.4476	115.169	67.3399	225.07	62.8926	851.439	142.777	219.584	0.193225	188.762	264.212	0.714435	0.795039	69.8104	73.9015	0.944641	0.0836467	150.782	209.114	0.721051	0.623848
P12787	COX5A	0.327017	-0.0897099	-0.00407955	0.0324418	0.00495099	504.185	504.695	491.703	565.287	355.402	525.853	171.893	23.1161	99.5546	168.079	1182.01	1642.57	107.777	89.2711	25.2219	134.897	126.678	1463.76	199.091	33.152	1176.6	844.352	24.8461	166.168	16.3348	185.15	19.4751	1435.92	183.108	87.5692	0.303043	163.3	184.107	0.886984	0.859661	23.181	24.201	0.957856	0.196863	130.8	94.8723	1.3787	0.619378
P56391	COX6B1	-0.0640409	-0.140853	-0.00342075	0.11374	-0.0655861	479.605	538.326	351.461	545.88	434.745	571.185	113.284	65.7676	67.6106	143.945	1089.03	765.081	84.8881	100.973	68.8241	227.917	195.002	717.61	269.174	72.8233	579.68	459.207	74.4431	127.602	101.927	211.104	89.3834	486.225	144.816	321.486	0.407271	162.006	208.074	0.778596	0.848596	77.5502	80.1725	0.967291	0.677481	130.071	169.116	0.769125	0.469083
A0A140LIU4	COX7A1	0.0365849	-0.432491	-0.271649	0.192681								30.8636	4.28794	19.8312	31.1961	5113.43	594.942	36.1779	31.8526	8.15766	45.5957	44.9125	2259.89	93.3007	31.4639	2771.42	2197.43	7.33899	28.6511	5.55483	42.1283	5.55036	1250.44	14.2016	11.8059	0.321695	30.2203	55.5417	0.544101	0.525707	7.01567	13.7689	0.509531	0.689176	31.1316	26.6121	1.16983	0.495729
P48771	COX7A2	0.0393919	-0.180016	0.0327464	0.00496095	0.00855501	505.31	533.831	456.526	506.658	469.686	477.378	300.978	76.5072	191.144	223.453	761.33	667.483	164.923	138.345	103.938	284.035	193.614	202.308	327.001	101.064	268.007	218.183	98.9196	179.546	96.2641	374.365	91.2298	280.415	106.416	210.584	0.372365	230.477	308.273	0.747638	0.48071	98.0291	91.2783	1.07396	0.511049	188.101	171.284	1.09818	0.900345
E9PZS8	COX7A2L	0.0214696	0.570938	0.0756487	0.172697	0.518178	1633.26	345.065	369.225	338.951	291.618	338.013	566.297	79.1486	332.67	216.829	3065.44	785.223	120.044	167.23	268.051	337.75	108.525	654.146	222.049	119.491	643.202	862.648	44.9418	80.0143	69.0942	145.055	56.7646	212.758	201.8	161.964	0.240035	368.616	194.644	1.89379	0.687997	123.252	89.2447	1.38106	0.794062	173.737	149.746	1.16021	0.600363
P17665	COX7C	-1.45513	-0.0396827	0.335037	0.00374713	-0.00259444	345.052	678.732	396.475	434.829	382.893	657.833	154.259	79.5222	359.576	272.455	571.351	456.988	348.838	809.404	165.821	210.02	145.835	15.1598	107.036	85.979	82.8779	83.0346	157.331	168.989	189.207	111.408	199.489	93.3596	41.0153	624.452	0.718554	135.098	163.633	0.825616	0.251682	174.214	118.236	1.47344	0.0917038	224.8	594.232	0.378304	0.933946
E9PZD8	CP	-0.134468	-0.836982	-0.00129461	-0.801944	-0.000163933	529.17	441.462	503.543	541.791	574.205	368.575	111.514	176.401	133.983	129.701	790.736	926.072	130.126	128.666	147.654	106.772	146.298	704.844	167.006	176.455	914.582	1220.83	206.124	105.489	323.309	151.874	303.525	293.485	89.4259	234.734	0.028895	102.571	149.527	0.685969	0.929573	219.101	225.388	0.972104	0.418436	128.59	164.509	0.78166	0.0923144
Q7TPZ8	CPA1	0.995065	2.28997	1.55808	0.57668								556.128	7.91004	176.272	38.161	5.47452	22.2263	70.2418	61.2685	1.82816	484.116	233.343	101.226	60.425	8.79132	49.2073	55.1316	883.326	82.1237	41.7323	120.707	58.5629	233.49	152.586	73.999	0.115562	397.61	73.0976	5.43943	0.409062	314.572	19.4779	16.1502	0.161973	163.913	68.5031	2.39278	0.39421
Q504N0	CPA2	2.84828	2.30563	1.85009	0.395999								557.611	11.4295	192.431	34.4646	25.2388	61.2673	61.8265	53.1042	1.9867	714.685	338.439	43.9772	38.9452	1.83923	51.6565	10.6377	1758.57	408.479	49.4526	88.1488	59.9199	216.846	73.7824	75.6266	0.176275	448.693	53.8529	8.33183	0.416162	606.827	20.9071	29.0249	0.0578616	313.117	63.5191	4.92949	0.471005
B2RS76	CPB1	1.57735	1.88491	1.0658	-0.0347487								532.763	8.13662	143.994	42.3609	12.5465	24.5174	59.7182	48.2734	58.4062	602.629	216.92	180.011	79.0751	47.892	146.059	345.182	993.102	108.592	124.632	56.7106	100.803	220.476	37.7961	60.5002	0.202694	391.063	59.3822	6.58552	0.3993	384.104	60.2202	6.37832	0.0857269	156.502	56.1639	2.78652	0.779038
O89001	CPD	-0.0123703	0.430176	0.0955926	-0.0494919	-0.115181	368.796	519.758	462.518	503.185	550.727	497.715	484.44	39.2944	231.83	385.924	126.756	125.242	187.906	238.688	49.6706	473.318	167.992	461.294	448.512	40.0772	350.504	394.024	37.1424	146.621	29.19	246.972	38.6227	106.495	549.559	157.033	0.126493	502.439	360.469	1.39385	0.34784	41.8119	36.1872	1.15543	0.740887	182.148	194.542	0.936289	0.703905
Q00493	CPE	0.0214993	-0.257496	0.660989	-0.0899483	0.0115611	505.222	487.075	500.308	474.984	506.952	479.045	370.955	26.31	177.286	377.222	260.769	379.499	167.548	139.915	41.7693	385.22	253.392	218.87	575.563	19.6428	296.297	208.009	48.0158	228.019	40.0932	510.667	46.1063	261.707	377.539	288.562	0.199934	377.905	487.817	0.774685	0.0994031	45.2971	28.682	1.57929	0.709497	219.566	198.675	1.10515	0.44186
E9Q969	CPEB2	0.00661652	0.141791	0.324547	-2.69e-05	0.031482	515.475	466.545	535.604	462.615	501.975	478.892	199.951	27.644	160.503	125.11	241.358	237.253	153.088	132.964	13.8468	150.284	381.413	1001.28	257.777	67.0951	751.857	566.25	281.852	142.442	215.15	136.927	292.482	303.953	348.328	346.456	0.465012	232.854	173.271	1.34387	0.445606	196.06	103.297	1.89803	0.874559	228.119	210.836	1.08197	0.992435
Q8C166	CPNE1	-0.196705	-0.998543	0.00190194	-0.000142884	0.0601053	496.351	489.224	549.849	511.413	480.841	429.744	107.566	301.236	150.043	206.33	102.162	130.852	138.22	284.21	367.82	134.383	169.256	137.756	157.608	292.827	126.253	136.551	245.252	223.71	260.072	207.523	261.478	151.386	116.798	316.055	0.0326125	119.582	190.487	0.627772	0.879397	291.516	284.712	1.0239	0.360216	181.003	246.161	0.735301	0.962669
P59108	CPNE2	0.211299	0.47298	0.374804	-0.633458	0.0978851	478.883	525.842	527.314	494.223	459.479	465.146	255.263	85.2343	251.125	149.015	132.12	129.73	228.506	236.698	122.39	216.311	230.236	106.728	179.836	125.795	251.012	223.565	214.255	327.491	150.424	188.457	183.213	117.082	203.639	185.489	0.0587902	225.071	172.436	1.30524	0.192818	173.286	120.484	1.43825	0.212255	269.617	216.898	1.24306	0.148092
Q8BT60	CPNE3	-0.00868054	-0.450364	-0.00846186	0.00638081	0.189961	518.067	515.841	516.779	478.218	482.137	452.068	160.688	204.943	212.187	246.428	100.348	99.1293	212.673	280.005	162.623	222.615	288.017	115.556	277.079	147.355	122.892	93.4664	160.973	234.986	182.56	203.988	189.225	110.52	144.933	276.517	0.105845	176.079	242.498	0.726102	0.725428	170.94	178.286	0.958799	0.736081	245.064	256.398	0.955792	0.741689
Q9DC53	CPNE8	0.133734	0.014318	0.162609	-0.123919	0.110052	486.096	558.314	502.125	473.334	442.383	490.255	245.474	74.8781	268.595	198.355	115.502	121.187	241.696	258.04	167.649	272.285	295.771	72.8407	237.458	175.711	167.075	101.562	240.207	383.644	225.791	321.725	218.601	127.548	289.893	298.426	0.699957	269.217	252.512	1.06615	0.387647	208.819	158.793	1.31503	0.289218	316.003	266.054	1.18774	0.390443
P36552	CPOX	0.0558365	-6.1e-06	0.95873	-0.00513255	-0.0136524	501.833	449.897	498.309	507.85	518.703	471.294	147.184	184.491	171.86	183.028	352.468	381.583	172.187	181.013	286.973	146.869	173.391	464.95	176.417	142.316	472.062	438.482	268.771	200.869	116.833	172.829	191.572	434.634	237.407	149.793	0.993652	177.154	177.425	0.998471	0.0531681	249.105	147.88	1.68451	0.338478	182.04	167.664	1.08574	0.771045
Q8BFS6	CPPED1	-0.389086	-0.0186025	-0.0200203	-0.24029	-0.000499293	491.723	479.262	496.862	470.744	570.188	440.647	244.831	88.5726	214.203	321.076	390.391	425.309	331.639	297.359	42.4005	131.015	119.515	762.38	185.959	51.0739	1023.69	638.324	78.0635	298.879	66.201	267.215	67.1333	248.24	325.105	296.568	0.741911	233.65	258.083	0.90533	0.708801	62.5324	68.6159	0.911341	0.19559	210.866	308.522	0.68347	0.382156
Q9WVJ3	CPQ	0.327981	-1.13195	0.390811	0.139673	-0.12418	457.274	447.081	471.205	481.865	581.165	490.979	282.446	158.576	160.919	358.058	211.239	247.852	102.229	103.604	150.908	222.506	125.364	262.012	387.74	115.306	191.19	218.002	188.413	126.097	139.816	340.184	204.614	312.079	217.465	118.321	0.0118912	240.806	361.994	0.66522	0.102388	181.312	137.899	1.31481	0.113657	137.46	108.052	1.27217	0.286533
Q8C196	CPS1	-0.15854	-0.0270416	-0.0302168	0.00646363								30.3154	38.4844	410.776	26.5344	121.948	132.836	493.385	687.945	24.2071	26.751	546.149	29.4474	37.7483	20.596	52.871	50.3909	26.1137	588.821	25.468	34.2397	25.5165	104.054	34.1101	692.853	0.572932	30.3922	32.8408	0.925439	0.641766	25.2791	28.1828	0.896969	0.268923	515.249	624.728	0.824757	0.877255
Q9EPU4	CPSF1	-0.0967952	0.00105215	-0.10909	0.655598	0.000358262	533.581	430.821	523.912	501.479	563.821	409.462	184.464	290.08	232.831	195.301	105.109	95.4607	209.406	203.103	263.335	175.173	204.529	89.2565	166.322	269.961	63.8918	47.398	268.534	158.454	305.845	232.433	261.033	264.701	245.008	285.749	0.909333	201.548	198.019	1.01783	0.138438	264.301	288.629	0.915712	0.377681	198.605	232.753	0.853286	0.26935
O35218	CPSF2	0.0283016	-0.0627912	-0.176509	0.0296927	-0.136049	490.991	364.367	503.071	525.781	557.759	494.772	108.737	438.648	136.702	137.132	61.264	66.5545	137.791	153.912	353.057	198.666	217.187	244.239	241.777	333.79	201.431	160.612	244.309	144.64	287.051	135.648	249.025	196.007	123.398	161.677	0.568876	143.601	171.519	0.837227	0.285216	282.13	353.163	0.798867	0.621376	166.176	151.127	1.09958	0.739597
Q9QXK7	CPSF3	0.114874	0.00895505	0.0154058	0.0915179	0.0293011	485.595	483.461	546.717	469.178	515.686	453.716	146.503	252.161	163.147	162.39	80.4453	68.9603	160.959	156.897	255.012	172.372	176.903	129.54	163.151	259.073	208.272	97.1592	324.985	302.34	317.25	181.959	293.707	293.63	212.081	196.254	0.728819	176.986	169.167	1.04622	0.629603	291.235	276.161	1.05458	0.439089	214.13	171.37	1.24952	0.611026
H3BJW3	CPSF6	0.00932173	-0.00604481	-0.216373	-0.0691997	-0.0341618	500.127	466.621	475.145	523.592	493.466	485.096	157.469	379.577	184.86	153.946	103.752	133.763	160.437	215.118	542.823	371.916	328.685	528.921	377.425	700.14	422.906	446.054	233.804	107.962	428.06	162.114	302.791	131.186	112.725	198.032	0.882193	214.037	231.162	0.925918	0.355836	359.806	502.592	0.715901	0.830755	207.169	191.196	1.08354	0.666368
P97742	CPT1A	-0.0803516	-0.0277319	0.000998094	-0.0196618	-0.0394156	496.567	475.464	466.088	526.902	486.18	490.688	272.097	194.16	150.693	230.562	243.288	280.872	192.182	185.781	122.841	263.319	166.236	111.381	261.397	118.774	176.74	132.936	173.03	194.05	166.157	306.458	192.7	175.596	204.543	187.923	0.558724	246.653	266.139	0.926782	0.921914	162.857	159.697	1.01979	0.284655	170.326	188.629	0.90297	0.747184
Q924X2	CPT1B	-0.26373	-1.15856	-0.287229	0.0202315								35.0518	26.3911	45.2034	56.5227	1988.74	2326.19	58.1278	46.5683	19.3906	28.9091	22.4509	1771.59	49.2515	41.2294	2511.27	1585.29	24.4811	28.7394	19.2222	47.475	15.7431	3323.73	37.8042	30.4614	0.010926	33.9217	51.0831	0.664049	0.295647	19.8716	28.9475	0.686469	0.287847	32.1312	45.0525	0.713195	0.71929
P52825	CPT2	-0.0235516	-0.588397	-0.340694	-0.0379101	-0.617377	461.104	444.733	421.195	529.213	548.436	515.69	189.189	58.5739	198.06	241.763	873.033	989.289	190.513	207.045	49.4479	141.786	148.275	976.409	199.692	59.6031	886.046	831.264	44.5568	215.053	50.814	234.523	46.1909	604.55	173.611	203.777	0.0402973	168.196	225.326	0.746455	0.0544315	46.7319	56.3303	0.829604	0.57878	187.129	200.445	0.93357	0.539264
Q64735	CR1L	0.0300251	-0.13541	-0.0399113	0.0284622								131.28	235.033	178.159	199.944	118.872	139.585	132.82	197.986	237.173	190.868	192.414	56.5792	155.632	233.195	69.6615	61.4849	214.941	186.83	283.282	172.673	246.621	135.236	112.926	183.831	0.328337	145.025	176.083	0.823615	0.416926	232.912	250.503	0.929775	0.548644	185.801	171.545	1.0831	0.718929
A0A1B0GS59	CR2	-0.00902632	0.0574739	-0.336972	-0.0053323								32.3903	747.793	31.9069	35.326	96.9798	92.6651	27.3935	21.1412	636.981	15.7597	13.8995	67.7247	19.0824	709.192	40.2967	80.4816	488.073	32.4342	825.592	20.1163	684.457	36.2304	41.7134	35.3343	0.612555	29.9545	24.8416	1.20582	0.0986966	603.17	760.859	0.79275	0.812712	26.0802	27.9564	0.93289	0.868556
P47934	CRAT	-0.229148	-0.367546	-0.180084	-0.159318	-0.215247	478.608	472.745	434.752	528.982	504.042	511.317	118.737	56.1147	104.752	136.93	2202.97	2365.72	122.786	113.585	30.9283	69.032	68.5924	1415.71	118.121	44.0272	1997.36	1356.23	38.4609	108.855	36.0326	143.322	40.124	632.193	108.235	117.515	0.138759	98.6679	132.791	0.743031	0.267379	36.5044	45.3915	0.804212	0.198756	94.0664	117.962	0.79743	0.424454
Q01147	CREB1	0.0380797	0.382074	-0.252388	0.0199319	-0.156722	477.111	450.527	405.532	583.74	426.255	576.032	125.39	495.455	119.738	94.5041	104.441	98.3788	116.667	76.401	353.91	139.287	175.579	5.8238	104.871	407.21	42.5299	67.089	408.97	16.6914	444.365	128.634	373.697	131.084	196.259	63.016	0.16656	153.645	109.336	1.40525	0.093369	378.859	449.01	0.843766	0.735144	104.003	85.3615	1.21838	0.807423
F8VPR5	CREBBP	0.422071	-0.0639235	-0.0804181	-0.0260251	0.0189558	571.214	430.316	530.377	429.719	496.371	518.84	104.879	299.855	188.365	199.837	90.2088	72.9333	219.638	214.816	785.242	709.732	1170.3	285.506	879.263	1179.91	205.409	263.409	267.511	206.025	378.357	212.635	322.457	85.4678	132.086	232.654	0.720145	315.566	430.578	0.732888	0.652809	458.403	619.373	0.740109	0.453754	521.563	222.369	2.34548	0.772618
O88668	CREG1	-0.0702688	-7.57e-05	0.507442	-0.202193								111.656	214.723	159.895	93.3963	210.23	227.997	166.382	179.209	843.127	132.705	176.981	175.921	185.19	379.959	232.797	186.738	297.674	107.117	165.026	223.387	344.881	150.228	253.858	161.029	0.984044	166.073	167.324	0.992521	0.298931	495.227	253.236	1.9556	0.427439	147.998	168.873	0.876384	0.180224
Q9CYA0	CRELD2	0.910258	0.652585	4.39e-05	0.0584164								214.569	152.445	334.776	131.8	116.928	135.446	200.63	134.163	107.757	287.534	467.962	11.0647	198.915	159.343	81.3098	104.187	202.628	199.752	158.161	78.9538	161.518	297.783	178.696	140.056	0.128655	226.933	136.556	1.66183	0.983258	157.301	156.65	1.00416	0.143101	334.164	158.283	2.11118	0.719029
Q9DCT8	CRIP2	-0.0670449	0.0761476	0.0108892	0.0605048	0.0800609	517.051	488.789	531.21	443.154	506.077	477.482	138.647	157.296	107.132	213.363	1179.1	1316.68	107.575	163.8	198.416	190.65	130.223	1140.85	116.316	166.742	644.408	717.66	157.484	32.9254	212.914	62.2843	208.98	835.255	155.512	65.5865	0.564568	161.603	130.654	1.23687	0.709807	188.293	178.984	1.05201	0.615529	90.0937	112.321	0.802113	0.554389
Q8JZR2	CRK	0.00441721	0.183714	-0.00707812	0.322945								274.716	79.2661	132.549	146.736	264.885	250.495	143.957	130.079	163.711	248.985	113.287	207.27	166.115	181.818	206.522	172.523	71.034	153.617	74.1394	319.58	75.3181	543.22	309.785	113.242	0.345697	277.829	210.81	1.31791	0.865202	103.354	111.741	0.924945	0.796328	133.151	129.093	1.03144	0.340189
Q64010	CRK	0.0479309	0.583956	0.000258443	0.248749	0.000358392	497.934	497.561	480.677	490.515	491.597	489.72	406.625	67.5235	164.682	186.814	393.993	413.107	150.806	113.623	163.711	248.985	113.287	207.27	166.115	181.818	206.522	172.523	87.388	153.566	88.5634	264.63	91.7002	595.127	302.792	123.08	0.119953	319.467	205.853	1.55192	0.971725	114.266	112.635	1.01448	0.491201	143.845	129.17	1.11361	0.381788
P47941	CRKL	-0.0602918	0.0339652	-0.16889	-0.0614093	-0.0893224	492.814	467.479	462.87	507.537	525.508	484.57	199.325	259.224	155.685	177.757	237.814	247.802	172	141.206	275.643	116.6	94.8098	202.866	129.033	319.406	218.973	235.38	234.385	159.294	270.778	183.572	215.112	209.878	236.858	153.064	0.636086	184.261	163.454	1.12729	0.181926	241.713	283.136	0.853701	0.47462	136.596	155.423	0.878866	0.276886
Q6P1J1	CRMP1	0.0354865	-0.0841068	-0.0251289	0.0105175	0.00595859	502.977	482.785	499.497	490.079	496.752	479.498	269.956	137.566	201.717	289.802	130.425	131.076	185.606	142.224	197.705	286.457	179.605	81.9801	288.338	249.997	71.1218	64.2015	150.096	177.077	175.734	335.288	163.071	75.5881	278.314	189.306	0.225398	278.242	304.476	0.913841	0.663279	170.291	187.766	0.906933	0.478172	186.133	172.379	1.07979	0.806234
P63154	CRNKL1	0.401633	0.0135859	-0.194787	0.0249981								126.318	432.354	123.025	109.051	118.127	129.035	112.279	121.853	267.379	163.428	236.844	137.292	197.727	282.443	146.01	135.401	220.366	213.884	226.559	127.423	221.251	192.634	177.575	149.638	0.744549	155.774	144.734	1.07628	0.333968	236.332	313.785	0.753164	0.203121	191.251	127.923	1.49504	0.634378
Q8CJ40	CROCC	-0.278137	-0.472547	-0.000116842	0.137393	-0.201469	474.383	475.136	440.019	521.318	531.91	488.324	161.484	402.845	173.509	317.931	197.99	249.504	180.993	198.744	179.879	105.269	220.74	150.237	137.418	167.013	146.563	155.673	511.208	96.319	676.715	295.412	542.353	403.98	189.521	321.665	0.219924	152.091	250.254	0.607748	0.982546	411.147	415.524	0.989465	0.288904	163.523	233.801	0.69941	0.492866
Q9DC50	CROT	-0.0251355	-0.00154131	0.00626506	-0.0200927	0.00387422	608.122	467.309	436.18	463.603	532.253	471.121	148.769	80.8652	207.66	116.412	179.932	186.165	347.632	301.568	116.212	156.615	371.084	312.085	222.582	150.327	309.166	384.241	134.653	365.838	140.252	156.291	138.756	304.876	177.47	386.089	0.907763	160.951	165.095	0.9749	0.811154	129.873	123.815	1.04893	0.645639	314.861	345.096	0.912385	0.722629
P23927	CRYAB	-0.140574	-0.197518	-0.525039	0.13387	0.158208	478.249	626.654	494.739	470.235	411.201	473.613	35.12	18.5959	54.4755	49.8166	1527.09	1457.42	47.1915	54.1798	11.2569	24.5522	12.1396	3146.78	27.4583	31.9995	1752.02	2003.6	9.71747	26.2154	7.15659	63.3461	7.48762	2001.28	43.2423	26.0175	0.364274	34.3048	46.8737	0.731857	0.305969	9.48732	19.2507	0.492831	0.492162	30.9435	42.4629	0.728718	0.421378
A0A0G2JG52	CRYBG1	0.147312	-0.224824	-0.00267144	0.530094								156.24	75.9247	229.923	206.09	67.5191	66.5911	205.237	223.925	117.626	261.339	305.685	215.589	399.37	131.854	202.309	74.1423	73.3803	281.75	70.8615	237.158	77.2656	521.638	191.219	266.283	0.331546	202.933	280.873	0.722508	0.89365	89.4239	92.8799	0.96279	0.233265	272.453	231.815	1.1753	0.37075
Q99KP3	CRYL1	-0.0136915	-0.0939582	-0.000582199	0.124978	-0.0325505	496.583	426.724	505.733	485.283	547.537	484.308	252.797	129.703	145.726	298.908	86.7893	104.936	222.671	217.032	116.975	227.024	185.635	55.5613	348.725	96.3137	58.05	68.9295	94.7939	274.43	93.9574	338.708	104.29	173.007	364.4	210.582	0.381429	281.407	328.781	0.855912	0.927297	105.353	106.658	0.987765	0.734685	201.93	216.762	0.931577	0.522553
P47199	CRYZ	-0.000937048	0.107251	-0.0273025	-0.440924	0.0428441	482.869	505.699	526.674	482.058	505.451	449.023	318.547	194.836	78.6424	297.79	388.201	398.992	81.339	66.135	179.166	282.311	60.3523	442.543	275.071	192.794	514.121	599.4	168.676	57.24	160.754	272.905	170.399	184.757	335.321	52.2607	0.185366	312.059	281.922	1.1069	0.462657	172.747	182.795	0.945033	0.918885	65.4116	66.5783	0.982476	0.170942
Q9CZU6	CS	-0.0417692	-0.483061	0.000123765	-0.021313	0.0515568	496.901	611.693	441.543	497.134	410.934	492.15	150.313	78.0071	171.511	282.618	1139.35	1042.94	177.998	253.301	63.5762	163.184	162.632	860.752	194.505	67.1505	993.29	879.982	80.034	221.227	76.0434	204.106	78.6313	700.645	156.497	185.998	0.12529	156.665	227.076	0.689922	0.95878	74.0805	73.7337	1.0047	0.532267	185.123	205.765	0.899681	0.642
Q9DBE0	CSAD	3.02e-05	-0.142016	-0.163853	-0.256629	-0.089065	440.902	450.53	509.802	513.501	500.593	512.08	431.18	170.808	226.246	598.923	128.463	138.985	193.563	228.254	161.213	330.934	146.865	265.543	373.612	161.405	252.674	303.423	51.7962	158.805	52.3835	353.289	52.7067	68.2066	288.068	107.987	0.378135	350.06	441.941	0.792097	0.493	88.5721	128.199	0.690897	0.98794	177.305	176.601	1.00399	0.366455
Q91W50	CSDE1	-0.0796424	-0.0875442	-0.0575337	-0.689507	-0.00906345	477.252	543.511	412.46	535.447	417.858	544.271	122.316	296.603	177.817	169.43	180.135	209.121	157.931	227.256	202.508	189.626	234.985	114.706	193.828	197.779	199.549	218.594	232.567	119.829	293.372	137.122	262.244	120.744	110.689	248.174	0.437175	140.877	166.793	0.844622	0.470945	232.439	262.584	0.885198	0.480056	177.544	211.12	0.84096	0.069036
Q9ERK4	CSE1L	-0.346782	-0.180862	-0.00547217	-0.05373	0.121856	486.278	544.845	526.013	469.741	420.279	507.389	147.634	271.003	211.422	188.309	200.847	194.232	223.214	257.011	197.304	121.466	159.121	466.735	107.5	198.061	394.725	473.538	244.551	216.109	288.455	173.001	285.803	210.868	96.6049	258.611	0.312794	121.901	156.27	0.78007	0.804803	242.553	252.507	0.96058	0.0907461	195.551	246.279	0.794022	0.6371
P09581	CSF1R	0.103279	-0.0522508	-0.0316518	-0.00125554								43.2628	491.595	100.831	55.6	54.0907	53.0431	72.5134	67.2907	314.133	49.8029	101.294	196.869	86.888	341.324	208.766	205.298	403.854	202.417	459.974	194.526	461.166	200.271	171.975	169.652	0.706717	88.3468	112.338	0.786438	0.577765	393.051	430.964	0.912027	0.540532	134.848	103.152	1.30727	0.943699
P41241	CSK	-0.0253899	-0.00448511	-0.479476	-0.00537795	0.013065	513.478	448.388	556.439	493.553	545.092	405.791	74.2397	483.326	98.8617	81.7328	44.2189	46.1022	83.9427	90.5642	420.158	79.2265	100.576	75.2915	80.9194	483.892	59.6439	79.7497	342.525	72.2619	480.021	87.5559	370.855	57.2383	90.8529	121.023	0.74041	81.4397	83.4027	0.976464	0.0436178	377.846	482.413	0.783243	0.617544	90.5667	98.51	0.919365	0.837194
Q80X68	CSL	-0.0431802	-0.409167	0.0329985	-0.148637	0.0345109	504.092	561.929	463.006	500.495	406.894	514.712	143.533	79.3222	177.3	323.506	888.855	844.16	186.127	310.116	63.1279	165.956	154.24	815.349	171.519	61.3442	1001.11	897.771	88.8756	265.038	77.0469	217.016	85.4424	653.028	158.628	188.96	0.210763	156.039	237.347	0.657429	0.544964	79.1486	72.5711	1.09064	0.607998	198.859	228.401	0.87066	0.209075
E9PWB2	CSNK1A1	-0.241212	0.0472015	0.18297	0.00042306	-8.93e-05	470.31	633.283	354.615	547.651	353.676	566.225	284.588	99.0786	289.477	235.879	175.566	212.638	277.686	327.841	120.534	288.146	202.229	85.8229	206.987	100.91	85.2131	96.8363	119.588	277.744	115.995	198.582	120.373	140.482	158.215	342.842	0.56171	243.65	213.816	1.13953	0.109051	120.165	105.328	1.14086	0.158591	256.483	316.123	0.811341	0.963255
A0A0U1RP94	CSNK1G1	-0.428754	-0.00523536	0.0846662	-0.134556	-0.00160746	471.871	555.23	426.304	521.241	431.188	527.277	243.853	117.909	175.465	208.762	173.569	159.405	221.601	196.18	132.761	66.0006	107.751	168.183	121.209	90.9247	166.397	210.184	209.309	211.122	240.567	213.242	217.091	97.2341	201.194	303.737	0.872063	170.349	181.071	0.940787	0.538815	186.387	149.8	1.24424	0.163707	164.78	240.506	0.685137	0.341053
Q8C4X2	CSNK1G3	0.0158051	-0.171228	0.0224034	-0.283466	0.0154906	497.471	536.285	471.516	488.268	433.375	521.657	158.713	175.708	162.052	161.596	117.229	108.039	161.105	187.498	146.976	220.149	276.576	239.563	337.691	115.629	310.032	243.701	205.622	211.392	229.882	227.764	220.912	64.2353	171.789	252.56	0.374032	183.551	242.35	0.757377	0.687981	191.17	173.739	1.10033	0.724093	216.673	200.388	1.08127	0.36772
Q60737	CSNK2A1	-0.22534	-0.0523805	-0.0149568	-0.404864	0.0317184	502.456	490.28	525.05	474.574	522.143	443.061	165.081	212.172	188.625	186.984	147.99	181.979	207.961	240.299	165.105	150.435	211.481	166.335	226.983	166.629	215.039	235.323	170.646	187.436	168.875	156.795	185.177	178.116	195.793	227.417	0.467656	170.436	190.254	0.895836	0.620803	173.643	182.559	0.951161	0.0762924	195.847	225.226	0.86956	0.0754599
O54833	CSNK2A2	0.3927	0.00432455	0.00421862	0.0103735	0.0573587	543.835	489.671	507.935	503.375	502.114	421.32	181.673	200.834	182.806	141.494	143.878	146.785	163.016	129.927	212.671	181.767	196.557	211.624	220.601	236.526	205.757	213.966	210.236	276.303	180.449	192.25	211.189	246.902	210.105	176.085	0.816508	191.182	184.782	1.03463	0.772018	211.365	205.936	1.02636	0.15397	218.555	156.343	1.39792	0.763772
Q8VHY0	CSPG4	0.394343	0.00640704	-0.0481603	-0.0823637	0.0469631	518.756	489.351	532.652	461.719	540.401	422.513	357.433	38.5104	249.738	259.217	302.582	338.553	237.135	202.296	41.5902	286.131	329.386	515.523	388.51	53.9326	489.406	467.017	25.7703	254.872	22.3856	366.915	30.4715	261.125	417.138	192.84	0.794267	353.567	338.214	1.0454	0.618883	32.6107	38.2762	0.851982	0.103015	277.998	210.757	1.31905	0.486114
P97315	CSRP1	0.0657892	0.482311	-0.00442936	-0.0576407	0.0012368	528.279	485.02	474.531	508.156	413.063	544.667	808.348	62.4564	133.826	313.023	92.8792	91.3709	132.585	88.3972	55.4611	505.769	168.188	100.186	465.76	43.6073	103.985	95.6466	63.2406	92.412	91.6787	343.133	70.2165	68.6517	451.733	116.796	0.183218	588.616	373.972	1.57396	0.856535	62.9728	65.9141	0.955376	0.508011	131.475	112.593	1.16771	0.420066
P97314	CSRP2	-1.37e-06	0.959699	0.0689958	-0.0577856								503.37	79.1866	228.895	213.426	301.225	361.11	213.321	137.659	254.175	447.02	176.078	155.181	198.521	306.009	172.222	239.179	250.869	102.773	313.995	150.241	351.118	191.969	229.198	157.205	0.126585	393.196	187.396	2.09821	0.580594	285.387	233.064	1.2245	0.997474	169.248	169.395	0.999134	0.59068
P50462	CSRP3	0.0127186	-0.0724555	-0.310053	0.10769								9.67813	9.63523	15.127	18.2263	2179.95	2235.53	18.0754	16.7527	24.0663	68.6754	29.5229	4480.68	82.2458	61.6468	2253.11	2797.45	5.98951	7.49617	4.25839	27.2292	4.02786	2517.6	14.5514	12.2249	0.695226	30.9683	42.5671	0.727518	0.536981	11.3612	25.1801	0.451198	0.820768	17.382	15.6843	1.10824	0.474979
P21460	CST3	0.499411	-0.00644076	-0.093419	-1.63478	0.236111	546.584	495.196	536.825	457.179	477.461	461.525	177.718	219.504	129.226	179.642	429.82	609.418	103.995	96.3422	183.325	188.546	119.247	386.004	213.077	213.202	701.818	585.837	135.223	112.117	120.665	155.152	141.444	320.518	162.264	80.0108	0.751274	176.176	182.624	0.964694	0.446323	153.33	184.457	0.831251	0.0421437	120.197	93.4494	1.28622	0.00615144
Q62426	CSTB	-0.0530021	0.0654221	-0.187721	0.779662	7.43e-05	467.286	536.994	466.788	492.435	442.665	531.099	372.098	181.806	254.2	211.192	155.241	154.406	218.525	187.829	88.2405	379.391	119.832	1010.33	256.043	99.1688	57.1673	141.151	113.236	166.571	137.46	305.32	121.334	137.757	170.45	218.023	0.553957	307.313	257.518	1.19336	0.315134	107.603	139.478	0.771471	0.5559	180.201	208.126	0.865828	0.385935
Q8BIQ5	CSTF2	-0.132064	0.0846495	-0.289229	0.0455401	-0.000479548	522.206	405.087	545.237	467.842	544.584	474.981	175.775	520.093	211.909	159.928	74.5484	88.6629	218.046	228.184	254.845	110.993	74.7701	79.0475	89.9966	327.457	126.42	30.6203	313.65	195.787	323.888	166.311	282.009	140.851	218.538	169.441	0.498213	168.435	138.745	1.21399	0.23649	283.501	390.479	0.726035	0.421243	160.822	205.224	0.783642	0.669232
O88712	CTBP1	-0.326999	-0.06363	0.0169911	-0.00721716	0.00344098	512.621	507.073	470.474	484.134	444.371	532.512	183.487	178.848	120.279	242.272	363.027	422.769	142.854	192.807	191.768	130.857	140.395	152.328	140.443	134.614	130.888	247.048	243.194	155.069	288.701	179.529	222.338	226.139	171.079	217.052	0.500952	161.808	187.415	0.863366	0.733796	219.1	200.721	1.09157	0.159978	138.581	184.238	0.752188	0.860764
Q8R242	CTBS	-0.0172995	-0.505817	0.417049	0.119845	-0.00745882	402.69	494.878	532.266	411.12	619.366	467.518	193.283	201.074	151.819	226.572	200.036	159.855	168.348	147.18	276.388	126.664	124.603	134.256	209.892	199.001	152.047	235.616	287.759	217.84	287.039	384.467	379.912	401.546	184.882	220.727	0.190069	168.276	273.643	0.614948	0.123046	314.687	229.038	1.37395	0.712768	164.754	178.752	0.921693	0.52359
Q61164	CTCF	-0.0526674	-0.0317407	-0.11009	-0.0185858	-0.0923371	471.86	515.423	383.42	475.793	490.533	587.463	253.601	442.662	210.376	160.69	177.875	218.745	211.696	226.886	417.103	30.9744	183.684	163.366	150.419	536.427	83.5389	124.319	209.423	43.7033	270.663	55.6701	373.425	34.1685	9.38135	95.3926	0.795417	97.9857	122.26	0.801455	0.454778	333.317	416.584	0.800119	0.655007	145.921	177.991	0.819821	0.792917
Q7TSG2	CTDP1	-0.36026	0.00866255	-0.0123175	-0.0631354								132.674	314.881	136.625	111.832	115.017	99.8022	167.61	273.171	222.567	141.7	123.445	236.258	153.581	251.715	253.188	236.155	293.208	147.365	309.708	198.034	315.523	132.374	218.928	157.692	0.801347	164.434	154.482	1.06442	0.688758	277.099	292.101	0.948641	0.224156	135.812	199.491	0.680792	0.600081
P58466	CTDSP1	-1.52641	-1.19943	-0.000112395	-0.0150438								196.446	217.111	234.666	357.212	185.262	122.247	304.114	346.907	218.153	152.022	165.993	8.39632	219.101	195.629	117.167	100.731	186.545	212.891	216.025	317.227	221.646	107.162	117.274	370.087	0.0529684	155.247	297.847	0.521232	0.954586	208.781	209.589	0.996148	0.00837373	204.517	340.369	0.600867	0.822483
P58465	CTDSPL	-0.318075	-0.684182	-0.119507	1.3033								194.774	254.315	387.786	365.7	307.647	59.2349	410.959	553.392	215.692	254.395	372.082	170.117	233.309	228.439	57.6853	74.1423	186.545	212.891	216.025	317.227	221.646	107.162	117.274	370.087	0.10324	188.814	305.412	0.618227	0.185927	207.961	232.926	0.892818	0.200718	324.253	444.813	0.728965	0.155815
Q8VCN5	CTH	-1.48335	-0.9597	-0.139983	-3.28e-07	0.003991	469.569	451.096	583.685	471.514	613.462	365.127	165.212	60.8923	194.094	264.748	137.983	135.907	340.746	531.713	4.99261	167.881	203.704	44.0312	217.88	6.97976	88.0648	38.2296	29.7145	212.217	15.5386	258.246	17.9047	80.0403	156.82	631.553	0.0246415	163.304	246.958	0.661263	0.615816	17.5373	27.8036	0.630756	0.0725474	203.339	501.337	0.405593	0.999066
P26231	CTNNA1	-0.042304	0.109798	0.0432193	0.00244798	0.0209948	496.492	511.944	495.21	470.882	517.061	461.016	269.909	47.3838	196.831	228.496	216.595	255.231	216.131	215.692	46.0125	272.82	199.588	407.454	285.578	39.864	346.711	305.366	45.4484	223.218	47.5131	243.356	53.7697	312.462	307.827	222.991	0.220635	283.519	252.477	1.12295	0.39775	48.4102	44.9203	1.07769	0.294417	206.546	218.272	0.946279	0.883974
E0CXB9	CTNNA2	0.00544068	0.0838965	0.168864	-0.0190242	0.00858492	495.884	509.473	483.008	469.587	495.362	496.115	205.652	59.1167	143.312	132.877	174.376	172.396	170.741	173.057	60.3223	215.4	193.279	222.475	234.969	39.2808	274.968	243.305	54.6298	275.014	50.9785	207.409	63.9526	243.167	249.322	238.405	0.416845	223.458	191.751	1.16535	0.224455	59.6349	49.792	1.19768	0.838401	203.868	194.068	1.0505	0.671225
Q65CL1	CTNNA3	-0.0829531	-0.018956	-0.0478672	0.0464702	-0.199379	487.029	396.093	476.303	528.328	545.127	500.83	166.353	65.8704	135.116	151.151	1139.69	1374.93	148.654	154.615	131.302	88.4112	95.3433	1411.69	114.139	134.211	1706.51	1354.73	19.1407	24.2934	16.4652	64.6264	14.6413	2677.67	35.6601	33.4187	0.788755	96.8082	109.972	0.880298	0.75462	55.028	72.1824	0.762346	0.622029	84.9177	112.23	0.756643	0.636973
Q02248	CTNNB1	-0.255704	0.000547101	0.0545465	-0.225795	-0.00468874	472.341	549.915	420.805	484.154	435.262	570.167	183.47	69.1412	228.958	330.813	226.682	243.453	238.481	356.614	63.0459	286.618	222.953	193.321	250.313	47.924	234.989	228.282	73.6124	295.439	69.7264	247.62	71.1802	174.035	371.963	385.193	0.946651	280.684	276.249	1.01605	0.442466	69.2795	62.2638	1.11268	0.222195	249.116	326.763	0.762377	0.12559
E9Q8Z8	CTNND1	-0.0465505	0.0058566	-0.102425	0.196278	0.0881897	517.138	517.567	509.094	430.662	490.468	497.919	252.45	85.4577	238.986	371.695	101.222	113.377	232.854	321.139	86.121	373.506	280.926	176.308	279.373	106.464	99.1392	93.1279	75.059	165.566	100.948	288.316	97.2686	120.249	352.863	221.893	0.796676	326.273	313.128	1.04198	0.270502	86.1495	97.6231	0.882471	0.548979	228.492	258.629	0.883477	0.304533
P70698	CTPS1	0.183141	-0.243955	0.0629172	-0.00729326	-0.00236723	490.593	495.115	480.475	498.463	502.333	478.294	125.561	230.782	239.026	176.518	143.049	110.599	205.346	230.305	363.106	131.491	305.137	579.641	378.655	245.006	563.39	462.876	205.65	209.548	167.792	146.444	194.37	319.714	205.644	178.36	0.39249	154.232	233.872	0.65947	0.554664	254.375	214.527	1.18575	0.240301	251.237	204.67	1.22752	0.874423
P70303	CTPS2	0.306399	0.0129753	-2.71e-05	-0.119451	-0.0671024	479.613	459.154	481.169	498.768	540.993	479.21	150.599	341.756	152.128	172.674	97.6217	130.272	135.979	126.781	307.041	217.382	186.308	172.802	259.383	326.176	190.416	156.541	375.839	159.145	371.97	171.138	354.93	122.235	282.494	145.395	0.760002	216.825	201.065	1.07838	0.978752	345.936	346.634	0.997987	0.0847179	165.86	136.052	1.2191	0.376291
Q62018	CTR9	0.137526	0.00733473	-0.0766499	0.232662	-0.00683441	505.971	472.451	468.171	537.284	556.942	406.485	247.761	339.997	229.132	171.807	216.472	195.344	208.168	169.806	222.429	140.528	246.349	82.8753	196.52	219.807	97.6253	98.4817	255.936	184.586	292.773	196.655	264.626	291.635	205.555	188.907	0.790594	197.948	188.327	1.05108	0.410984	247.664	284.192	0.871465	0.2364	220.022	188.96	1.16438	0.405977
Q9CR35	CTRB1	1.49422	1.84191	2.02069	0.555954								441.362	7.89789	285.582	11.6884	39.4043	21.5731	142.977	80.8045	10.3387	686.014	484.257	64.2305	48.4847	12.8013	67.1534	66.5305	1132.97	162.834	10.1836	146.863	30.9319	333.075	85.3541	56.3613	0.18957	404.243	69.0119	5.85759	0.412113	391.414	10.2943	38.0225	0.137684	310.891	93.3811	3.32928	0.424015
Q9ER05	CTRL	2.04444	2.14008	1.76994	0.203967								493.112	7.86326	52.2123	11.6251	20.0847	23.7699	5.33822	4.51518	26.8087	889.728	276.224	202.784	63.5547	29.7316	92.204	115.353	1560.36	103.622	34.5806	87.0181	66.8547	147.581	68.9699	46.3569	0.210472	483.937	54.0659	8.95086	0.405766	551.341	24.0585	22.9167	0.201911	144.019	18.7368	7.68645	0.500908
G3X8T3	CTSA	0.0012791	-0.0879408	0.354963	-0.0567838	-0.0152699	451.222	467.231	519.724	463.771	543.21	491.646	245.276	171.068	183.653	217.761	149.192	185.054	215.3	172.827	288.031	205.479	254.417	93.6255	326.086	220.163	142.961	128.158	218.854	252.013	172.636	308.392	225.634	156.272	283.14	287.174	0.391087	244.631	284.08	0.861137	0.114744	244.173	187.956	1.2991	0.910024	230.028	225.101	1.02189	0.507677
P10605	CTSB	0.244423	-0.0846039	1.04733	-0.456514	0.0141938	427.708	602.554	478.265	465.337	417.217	540.532	146.694	231.922	172.212	169.725	235.007	250.494	131.221	152.457	328.782	327.295	374.993	206.375	463.727	233.992	297.512	391.834	400.003	134.549	244.393	178.306	414.283	208.018	144.802	161.119	0.608068	206.264	270.586	0.762285	0.0297963	381.022	236.769	1.60926	0.401122	227.252	148.266	1.53273	0.139314
P97821	CTSC	-0.00944121	4.75e-07	0.124254	0.535535								171.049	277.452	208.376	92.8232	80.8473	74.5629	167.412	162.749	377.868	161.707	123.409	107.886	227.016	355.682	82.0556	60.0644	324.629	161.944	293.351	150.115	352.576	240.891	137.443	190.769	0.998545	156.733	156.651	1.00052	0.217433	351.691	308.828	1.13879	0.755052	164.576	173.643	0.947782	0.286867
P18242	CTSD	0.299575	-0.395433	0.385415	-0.116528	0.00396579	501.362	491.689	491.153	486.698	505.199	474.772	157.584	217.491	110.778	168.147	400.775	471.444	105.711	108.521	288.393	140.112	130.653	514.72	210.353	241.664	546.14	465.807	263.75	162.752	170.831	226.477	256.803	366.256	164.498	95.427	0.0959035	154.065	201.659	0.763988	0.085419	269.649	209.995	1.28407	0.166162	134.728	103.22	1.30526	0.280005
P70269	CTSE	0.473717	0.585523	1.70203	-0.553318								361.232	110.72	57.2491	214.297	283.868	312.359	46.9089	33.8899	349.579	796.774	173.785	305.741	501.7	236.116	339.093	762.557	465.219	3.12973	89.6505	150.195	261.653	147.327	454.193	10.8808	0.222184	537.4	288.731	1.86125	0.0493209	358.817	145.495	2.46617	0.446517	78.0547	30.5599	2.55416	0.257915
P49935	CTSH	0.39338	-0.0048395	0.036163	0.24078	-0.0586626	446.815	414.636	518.821	462.297	634.725	455.178	133.327	323.433	138.493	107.65	71.6491	67.0235	147.363	110.073	335.376	128.211	167.704	103.104	169.406	333.299	78.7326	89.1285	335.621	190.741	333.075	167.153	352.898	154.905	165.54	118.634	0.82168	142.36	148.07	0.961436	0.18183	341.298	329.936	1.03444	0.105099	165.646	125.357	1.3214	0.321829
F6WR04	CTSS	0.00347944	-0.0464673	0.589488	0.26149								219.268	218.541	142.937	129.154	89.5489	104.499	175.418	97.3973	335.991	78.3829	72.5434	45.961	151.993	258.475	52.1418	50.1191	396.447	194.528	236.049	222.501	286.304	213.507	129.279	118.204	0.638414	142.31	167.883	0.847674	0.0715583	339.58	237.688	1.42868	0.88949	136.67	130.34	1.04856	0.45062
Q9WUU7	CTSZ	-0.134635	0.0121521	0.0217892	0.0236772	0.0965948	504.896	513.588	527.955	434.035	468.872	511.126	261.045	630.621	364.019	161.085	225.444	188.5	279.811	470.195	337.881	55.1263	126.328	52.9731	60.1897	247.344	63.686	77.439	503.979	242.115	498.017	137.465	700.147	107.403	87.2279	224.279	0.847636	134.466	119.58	1.12449	0.736919	514.002	458.661	1.12066	0.470859	244.154	324.762	0.751794	0.786581
Q60598	CTTN	-1.03514	-0.0666749	-0.0391893	-0.228352	-0.290665	436.132	489.773	408.937	541.301	485.87	549.886	180.755	75.8855	282.612	562.936	170.105	258.436	298.334	624.325	162.662	312.858	146.324	215.457	184.411	198.113	182.316	200.439	158.933	129.407	327.263	137.708	182.782	95.6153	185.887	342.767	0.668551	226.5	295.018	0.76775	0.700489	168.126	200.42	0.838865	0.132757	186.114	421.809	0.441229	0.280978
Q99LJ0	CTTNBP2NL	0.223639	0.183967	-0.241186	0.720707	-0.0405292	501.038	475.128	466.527	512.088	500.33	489.143	268.784	257.196	205.309	303.847	309.41	233.878	190.204	188.825	99.9726	471.618	202.47	222.652	329.285	152.277	130.008	187.528	113.675	216.544	85.469	250.603	116.524	368.861	387.635	158.325	0.300302	376.012	294.578	1.27644	0.386404	110.057	164.981	0.667092	0.0926059	208.107	179.118	1.16185	0.0960368
Q3U308	CTU2	0.0924768	-0.0252107	-0.30322	-0.0460094	0.0012309	529.665	467.28	490.05	508.485	441.636	518.732	254.14	351.196	302.451	318.801	185.061	129.415	281.547	294.41	244.128	331.495	337.32	67.5095	332.435	311.228	171.78	99.5663	213.671	277.799	212.492	242.409	190.03	85.1977	240.123	251.512	0.600928	275.253	297.882	0.924033	0.199794	215.943	291.639	0.740447	0.239786	305.857	275.823	1.10889	0.650887
Q9WTX6	CUL1	-0.0195931	-0.300026	0.0319264	-0.179412	0.00262783	490.332	510.556	485.275	471.765	448.33	540.162	144.277	195.161	230.115	367.201	205.181	214.145	249.296	348.171	134.81	256.612	297.984	164.696	280.161	110.112	222.333	204.061	215.941	228.281	206.683	200.484	223.808	187.578	203.167	221.084	0.243556	201.352	282.615	0.712461	0.642948	191.52	170.652	1.12228	0.673087	252.127	272.85	0.924048	0.12731
Q9D4H8	CUL2	0.368928	0.00807124	0.00547241	-0.0231789	0.0701017	504.079	486.394	530.933	483.876	462.584	488.813	222.964	122.365	203.646	183.214	410.272	412.837	180.048	170.373	145.922	151.044	199.065	435.762	202.225	134.892	331.272	374.302	118.33	210.257	92.8298	156.548	100.236	156.926	193.223	137.481	0.753546	189.077	180.662	1.04658	0.80522	121.496	116.695	1.04114	0.0757511	204.323	162.634	1.25633	0.712096
Q9JLV5	CUL3	0.170318	-0.0577058	-0.0310308	-0.191798	0.0851067	528.156	538.555	479.377	475.288	430.134	509.74	205.524	261.789	182.367	232.9	270.63	291.712	170.807	205.375	260.432	186.612	244.249	212.309	226.641	257.53	353.289	406.463	204.815	243.051	202.491	236.273	201.631	355.988	243.918	185.272	0.358579	212.018	231.938	0.914113	0.534901	222.292	240.603	0.923895	0.21389	223.223	187.151	1.19274	0.257793
Q3TCH7	CUL4A	-0.256342	0.0103439	0.205152	-0.00240472	0.023999	459.291	549.104	506.494	483.018	414.293	529.42	204.901	147.715	184.036	170.863	105.349	95.6483	157.974	170.879	234.755	145.501	152.747	163.225	145.101	209.186	125.343	136.199	266.771	129.994	277.281	85.6544	308.421	76.4379	84.2683	383.235	0.811597	144.89	133.873	1.0823	0.262251	269.982	211.394	1.27715	0.379576	155.592	237.362	0.655505	0.895258
A2A432	CUL4B	-0.422	-0.00990498	0.00315939	0.0579265	0.0433836	519.309	467.02	541.78	457.702	510.138	467.964	184.874	235.224	192.938	179.191	144.683	139.974	172.684	194.661	463.906	97.0043	113.542	99.0314	84.1274	392.01	98.6933	89.2354	238.42	150.951	295.126	156.819	259.397	130.47	107.714	438.332	0.811039	129.864	140.046	0.927298	0.886335	320.574	307.453	1.04268	0.304266	152.477	268.559	0.56776	0.496466
G3X914	CUL5	0.0232834	-0.271908	0.00970019	-0.142756	0.442524	524.788	516.76	523.288	466.434	467.691	467.514	163.903	228.766	210.144	215.118	227.379	210.532	211.531	223.681	233.083	179.8	225.839	384.323	196.318	230.958	471.257	367.068	246.743	317.431	258.259	268.794	259.584	184.719	196.466	259.546	0.152234	180.056	226.744	0.794096	0.590673	246.47	239.328	1.02984	0.632241	251.138	231.586	1.08443	0.437127
Q9CQ89	CUTA	0.338014	0.0781793	0.0104497	2.27e-05	0.0375072	554.844	454.721	524.256	459.826	487.305	490.691	369.319	203.176	207.557	201.276	499.007	725.866	225.376	170.743	140.86	172.56	239.799	678.935	299.375	123.155	787.556	803.302	201.936	308.057	137.703	252.095	151.103	1147.08	368.719	168.551	0.51922	303.533	250.915	1.2097	0.765367	164.633	154.678	1.06436	0.156648	251.804	188.224	1.33779	0.989922
Q9D8X1	CUTC	-0.284137	-1.0037	-0.171058	-0.0589049	-0.50532	470.158	420.855	434.535	521.947	545.073	530.816	91.7569	478.272	155.819	233.411	102.974	115.839	146.769	178.953	166.582	79.3025	92.665	262.718	120.597	186.449	287.671	211.789	305.955	138.151	475.618	280.62	358.38	138.824	118.802	174.575	0.12948	96.6203	211.543	0.456742	0.422119	276.973	380.113	0.728659	0.172108	128.879	166.766	0.772812	0.622758
H3BJQ9	CUX1	-0.0187228	-0.0636173	-0.0372011	0.115069	-0.00032344	490.017	436.534	542.771	519.72	514.247	446.058	210.657	225.634	157.233	241.601	297.759	289.254	180.465	169.195	73.2209	211.716	185.475	282.924	365.617	83.3285	133.232	133.872	172.389	110.9	176.818	254.754	170.044	139.813	321.09	139.074	0.503334	247.821	287.324	0.862515	0.68329	138.551	161.927	0.855641	0.669901	151.202	162.912	0.928125	0.491458
P53564	CUX1	-0.0187228	-0.0636173	-0.0372011	0.115069								210.657	225.634	157.233	241.601	297.759	289.254	180.465	169.195	73.2209	211.716	185.475	282.924	365.617	83.3285	133.232	133.872	172.389	110.9	176.818	254.754	170.044	139.813	321.09	139.074	0.503334	247.821	287.324	0.862515	0.68329	138.551	161.927	0.855641	0.669901	151.202	162.912	0.928125	0.491458
H3BJN3	CUX1	-0.0242398	0.00901916	-0.07899	-0.0256472								231.759	233.583	172.926	285.329	350.682	325.721	199.584	198.109	165.082	398.662	221.974	252.141	344.341	169.815	250.669	218.678	171.222	107.685	175.447	275.299	173.017	97.8649	325.741	156.102	0.769819	318.72	301.656	1.05657	0.373339	169.774	192.948	0.879893	0.671186	167.528	184.599	0.907527	0.723299
Q8C5N3	CWC22	0.0139868	-0.0515827	-0.000298629	0.0214476								146.733	311.786	161.422	217.1	108.465	106.11	165.297	248.176	338.716	225.694	243.616	129.851	189.256	287.311	92.257	98.0326	308.148	310.205	425.581	218.165	368.327	81.5355	188.808	248.564	0.462775	187.078	208.174	0.898663	0.950052	338.397	341.559	0.990741	0.749173	238.414	220.679	1.08037	0.637931
Q3TKY6	CWC27	0.497648	0.0992342	-0.0611124	0.195226	-0.0243001	449.478	488.878	498.563	486.176	527.545	483.333	209.308	270.853	160.324	154.334	665.69	575.014	132.105	143.128	371.962	197.209	239.265	280.618	218.904	463.949	247.486	195.381	235.471	197.375	247.988	171.358	218.494	511.409	216.411	139.114	0.307722	207.643	181.532	1.14383	0.570686	275.309	327.597	0.84039	0.113592	198.988	138.116	1.44073	0.419972
Q8CI33	CWF19L1	-1.05445	3.14412	-0.405643	-0.57033	0.0587522	496.654	427.61	652.095	413.395	461.256	518.493	221.789	455.603	74.0577	81.2444	78.1941	120.624	107.741	78.3265	315.644	141.951	21.5067	106.032	78.9018	386.998	110.476	115.881	262.076	25.9205	300.806	1.54358	253.237	5.43565	211.111	69.088	0.0191364	191.617	53.8966	3.55527	0.131556	276.986	381.136	0.726738	0.103534	40.4949	85.052	0.47612	0.221577
Q91YL7	CWH43	5.77e-05	0.180716	-0.0236466	-0.292796								436.157	169.345	124.543	255.607	555.063	755.597	131.644	113.22	132.426	240.218	84.8286	355.397	303.799	106.105	429.651	672.767	88.5647	132.125	81.8098	309.423	99.7021	443.084	451.596	95.13	0.331222	375.99	289.609	1.29827	0.705028	106.898	119.087	0.897646	0.979339	113.832	113.331	1.00442	0.228738
P56395	CYB5A	-0.0104412	-0.186065	-0.00441943	0.124839	-0.00103081	521.54	520.216	423.162	526.536	505.528	451.936	171.048	125.568	362.575	257.344	222.559	190.363	431.511	511.306	120.157	161.011	337.014	329.898	225.408	118.17	196.525	194.397	97.3822	355.405	75.9346	282.761	89.9337	173.216	274.171	194.377	0.280003	202.077	255.171	0.791926	0.834204	102.491	106.558	0.961837	0.800828	351.665	379.064	0.927717	0.40735
Q9CQX2	CYB5B	6.34e-05	-0.549164	-0.230728	0.150491	0.0871643	506.817	507.36	534.31	473.882	514.499	425.367	193.126	175.726	248.903	280.47	149.87	155.046	316.32	317.818	69.3497	216.23	370.254	526.357	542.393	62.9337	185.509	186.273	69.4026	369.871	90.4184	337.564	81.8019	121.601	285.118	350.733	0.181364	231.491	386.809	0.598464	0.398409	73.5181	109.693	0.670219	0.976268	329.676	328.29	1.00422	0.560604
Q9DB73	CYB5R1	0.315155	-0.136184	0.0310731	-0.00324268	0.0134126	508.432	556.333	446.925	499.273	402.727	535.604	138.952	154.313	258.495	242.082	615.104	342.86	239.029	248.913	369.374	302.895	478.72	684.446	342.795	326.747	795.752	774.693	190.33	239.736	152.636	177.69	174.499	537.065	138.306	162.628	0.451576	193.385	254.189	0.76079	0.713996	244.734	211.232	1.1586	0.29022	325.65	216.857	1.50169	0.881162
Q9DCN2	CYB5R3	-0.134616	0.00978481	0.0272547	0.0260869	-0.0361679	456.63	562.124	370.386	563.94	423.231	541.624	178.353	164.873	163.805	171.969	141.877	147.999	232.465	281.683	156.827	214.385	263.106	64.5614	178.015	147.694	82.9214	84.407	161.875	203.984	163.355	210.364	182.656	150.171	189.753	239.383	0.66833	194.164	186.783	1.03951	0.43368	167.119	158.641	1.05345	0.298332	210.298	251.177	0.837252	0.712895
Q61093	CYBB	0.330701	0.0338367	0.225498	0.10587								66.4559	449.369	137.415	67.7124	345.882	235.159	93.2468	94.0398	452.961	64.6714	67.1009	60.9325	36.997	388.641	48.0153	17.1792	726.19	113.043	682.925	15.4957	893.4	54.5674	13.2732	13.3634	0.744922	48.1335	40.0684	1.20129	0.312541	690.85	506.978	1.36268	0.316746	105.853	66.8833	1.58265	0.674602
Q3TYS2	CYBC1	-0.125075	0.995993	-0.170626	0.127322								78.4236	587.804	148.055	74.0873	65.2573	67.1039	96.2475	143.177	534.397	113.79	100.034	124.846	55.0849	501.826	53.3702	24.692	443.422	34.7926	619.873	30.3561	497.805	18.8319	92.8834	131.319	0.0647074	95.0323	53.1761	1.78712	0.157078	491.875	569.834	0.863189	0.478057	94.2937	123.581	0.76301	0.572328
Q9D0M3	CYC1	0.0350497	0.000581726	-0.138238	-0.0522304	0.0823813	502.331	491.525	564.236	455.191	530.196	421.365	146.712	51.4251	130.162	174.815	1353.86	1329.58	103.985	129.277	39.4843	168.664	116.055	1350.83	185.613	59.5799	1436.65	1378.29	48.2037	128.604	45.6611	193.164	47.4178	1181.61	246.273	118.032	0.93777	187.217	184.531	1.01456	0.225336	45.0353	52.222	0.862381	0.421915	124.94	117.098	1.06697	0.273667
P62897	CYCS	-0.0168716	-0.00613067	-0.609114	0.00278712	0.0416738	513.998	507.645	493.75	512.004	454.887	473.148	121.598	56.9154	106.099	158.168	1525.17	1833.92	104.801	111.823	25.9312	107.664	83.6839	1384.82	119.962	48.7569	1254.97	1464.02	39.0846	113.382	39.3558	114.633	34.0162	1768.03	147.8	103.181	0.786756	125.687	130.921	0.960024	0.0782088	33.0107	48.3427	0.682847	0.604144	101.055	106.601	0.947969	0.848662
Q7TMB8	CYFIP1	-0.0170263	-0.254955	-1.37e-07	-0.251714	0.00138123	468.013	553.194	460.332	487.721	403.972	563.784	149.994	206.406	188.806	177.387	78.9396	89.2383	182.955	257.751	211.17	182.428	175.457	92.116	205.248	209.152	124.854	124.088	207.071	267.21	233.377	187.7	230.614	97.3172	143.376	238.203	0.105895	158.599	190.112	0.834243	0.998227	216.285	216.312	0.999877	0.687169	210.491	226.303	0.930129	0.175938
A0A0R4J119	CYFIP1	-0.000412471	-0.0400398	0.00190446	-0.0689631								152.667	217.176	200.111	167.3	90.6757	99.3033	192.047	270.969	175.81	216.546	215.966	85.9615	238.304	154.176	139.005	140.689	213.407	305.181	238.559	187.651	235.513	147.585	166.005	267.056	0.53755	178.406	197.752	0.902172	0.881076	208.243	203.303	1.0243	0.947243	240.419	243.357	0.987927	0.494053
Q5SQX6	CYFIP2	-0.264452	-0.316573	0.028406	0.184773	0.0135782	474.303	557.295	478.011	472.605	402.571	558.121	98.5116	301.236	130.791	148.971	90.4685	87.3753	141.301	210.631	430.86	88.364	106.007	86.7417	103.397	387.418	70.9363	82.6162	395.848	144.506	492.524	89.8083	461.574	101.06	58.5598	147.883	0.218598	81.8118	114.059	0.717276	0.593133	429.427	393.726	1.09067	0.210234	127.102	166.605	0.762891	0.129175
Q8BKE6	CYP20A1	0.573511	0.0084075	0.00503509	-0.428127								247.505	169.429	218.097	175.046	84.4901	83.9679	199.091	127.056	390.618	482.887	658.833	221.064	441.548	372.624	346.62	269.909	201.113	225.669	200.741	221.003	196.677	77.5601	180.596	182.57	0.852347	303.663	279.199	1.08762	0.873854	262.803	247.598	1.06141	0.30626	367.533	169.572	2.16741	0.322285
Q9DBG1	CYP27A1	-0.546085	0.00809083	0.335481	0.0209184								265.507	111.655	225.906	254.064	189.518	211.589	371.67	405.65	180.407	188.072	246.777	2.60691	156.092	138.373	36.4468	31.2424	156.04	295.831	156.2	222.39	174.315	142.671	212.38	293.938	0.778125	221.986	210.849	1.05282	0.0964945	170.254	135.41	1.25733	0.0724998	256.171	357.086	0.717393	0.831822
Q9WUD0	CYP2B10	-1.13222	0.000184437	0.00555073	0.016194								34.0194	42.9258	123.181	38.223	168.213	257.937	551.737	985.917	15.7782	8.80684	224.358	8.97688	8.44742	10.4804	46.1352	17.185	38.3369	551.698	28.535	111.738	33.5819	201.096	118.488	540.953	0.983934	53.7713	52.8028	1.01834	0.877655	29.2323	27.3137	1.07024	0.115714	299.746	692.869	0.432615	0.853706
Q9D816	CYP2C55	0.000605476	2.91877	0.0207964	0.406636								825.976	16.7287	44.7244	162.482	67.7898	78.4256	52.3801	45.572	36.8683	708.042	37.9351	97.4054	153.767	51.2243	71.0826	61.1682	16.6287	40.2948	14.196	133.895	40.956	217.042	1663.28	22.9053	0.0929067	1065.77	150.048	7.10284	0.788345	31.4843	27.383	1.14978	0.945372	40.9848	40.2858	1.01735	0.336402
Q148B1	CYP2C65	-1.54961	-0.00867781	0.000489312	-0.0307173								342.618	41.8871	126.95	413.977	81.4263	93.0826	256.894	345.327	36.5341	296.012	155.491	67.4745	424.404	32.9926	73.8721	71.3904	35.781	202.002	44.7978	343.769	48.7808	72.2205	483.217	288.003	0.767569	373.949	394.05	0.948989	0.935861	40.3653	39.8925	1.01185	0.0171691	161.481	296.741	0.544181	0.520167
A0A0R4IZY2	CYP2D26	-3.41076	-0.0179736	-0.000803231	0.0287368								62.2847	27.9294	156.166	61.3093	135.316	202.277	748.619	1062.77	52.3973	106.087	236.34	64.0862	131.743	45.6267	46.0663	76.2153	13.5182	347.698	12.1523	43.5618	17.2063	183.855	40.4421	762.004	0.79492	69.6045	78.8713	0.882507	0.959029	27.7072	28.5695	0.969821	0.0126673	246.735	857.798	0.287637	0.758895
Q9DBX6	CYP2S1	-0.0555673	-0.644284	-0.0325946	-0.00856802	0.174456	545.404	452.438	630.421	446.76	495.752	415.566	198.965	129.401	181.113	436.163	241.83	219.688	254.316	471.682	79.9838	363.126	397.095	27.6463	469.218	79.6968	97.3778	79.0116	87.6288	286.4	100.187	336.802	111.752	87.6661	252.344	297.778	0.0875134	271.478	414.061	0.655648	0.599719	93.1215	103.095	0.903259	0.591645	288.203	341.259	0.844529	0.876206
Q64459	CYP3A11	0.113497	0.0244204	-0.355684	0.0156014								124.784	71.4538	446.82	84.8467	705.59	448.777	569.046	734.557	60.3816	43.8022	773.988	145.415	49.308	65.6742	139.644	148.135	14.8321	2389.68	38.9627	60.9015	37.9004	19.413	55.1587	1201.9	0.752739	74.5818	65.0188	1.14708	0.277315	37.7047	58.6969	0.642363	0.609079	1203.5	835.168	1.44102	0.861471
Q64464	CYP3A13	-0.0934754	-1.74041	-0.0631894	0.0365644								112.825	49.2537	266.442	260.025	104.847	132.303	402.472	561.069	20.3232	103.14	407.88	19.6569	315.171	11.7509	49.5521	71.7352	25.4094	503.916	26.5234	206.417	23.9823	185.863	115.084	440.275	0.0394249	110.35	260.538	0.423546	0.641965	23.2383	29.176	0.796487	0.426704	392.746	467.939	0.839311	0.749125
Q99N19	CYP4F13	-0.114805	0.130025	0.0263652	0.0341115								164.156	63.5305	200.979	173.821	1004.62	783.695	337.866	337.782	57.7955	131.228	290.967	105.38	129.012	74.2443	98.2295	40.93	130.47	322.581	134.522	172.748	120.939	98.3429	344.953	283.015	0.497749	213.446	158.527	1.34643	0.71817	103.068	90.7655	1.13554	0.324785	271.509	319.554	0.849649	0.817101
Q9EP75	CYP4F14	-0.503111	-0.222474	-0.03476	0.0106433								65.9663	28.3508	235.537	99.4183	445.742	372.699	464.305	530.154	33.913	84.5925	320.831	52.0572	137.152	32.2177	67.8027	69.6032	17.2204	501.844	21.9492	113.81	22.1191	87.7388	120.333	594.936	0.251578	90.2973	116.794	0.773136	0.627628	24.4175	27.5059	0.887718	0.138896	352.737	529.798	0.665795	0.884112
Q99N17	CYP4F16	-0.0129567	0.0430854	-0.000101528	0.0194429								96.8594	120.447	193.422	96.1796	408.766	402.13	284.565	300.95	56.0485	88.5144	219.785	68.627	91.8504	62.8073	51.8429	43.4564	132.176	420.899	125.62	94.1026	118.18	119.971	124.836	319.202	0.484409	103.403	94.0442	1.09952	0.980021	102.135	102.958	0.992003	0.775322	278.035	301.572	0.921952	0.844085
Q99N16	CYP4F3	-0.000664402	0.0219513	-0.0652524	0.153103								101.939	275.084	178.799	81.8157	90.2677	110.006	229.943	217.809	55.3758	49.7622	156.462	35.1517	58.3933	53.1115	8.9877	46.5959	173.64	388.509	177.364	102.428	166.397	118.792	118.914	291.644	0.725394	90.2051	80.8791	1.11531	0.654549	131.804	168.52	0.782129	0.951565	241.257	246.465	0.978868	0.533158
G3UW81	CYP4F40	-0.988455	-0.0680057	-0.0579104	0.17527								89.8947	73.8015	284.907	143.378	800.446	636.101	430.21	537.962	55.6826	107.619	246.451	402.94	113.732	62.0896	139.384	114.204	56.4362	352.931	56.9072	134.158	63.2959	188.496	145.02	416.71	0.442227	114.178	130.423	0.875443	0.376008	58.4716	64.2661	0.909835	0.0296933	294.763	461.627	0.63853	0.535234
Q9DBW0	CYP4V2	-1.77619	-0.337145	-0.192089	0.325473								48.711	84.9087	208.403	56.1606	295.866	218.301	544.615	622.091	70.4947	55.5385	411.067	69.9025	61.3636	87.3611	99.5946	140.016	58.8594	302.726	63.1089	73.8348	64.4411	438.362	46.4248	674.351	0.105278	50.2248	63.7863	0.787391	0.206571	64.5984	78.4596	0.823334	0.0165636	307.399	613.686	0.500906	0.397511
Q8K0C4	CYP51A1	-0.348313	0.844032	-0.537846	0.236924	-0.0146941	483.465	445.904	512.785	468.976	552.155	481.837	444.951	54.5288	198.062	182.055	132.723	129.107	285.073	238.059	43.6704	327.317	227.71	85.3321	267.804	60.6307	75.5008	53.2759	34.438	227.937	44.2889	139.999	37.2273	138.575	263.765	388.76	0.0914875	345.345	196.619	1.75641	0.0706179	38.4452	53.1495	0.723341	0.188223	217.903	303.964	0.716871	0.311487
A2A517	CYTH1	0.448626	-0.000408576	-0.0265328	-0.039171								102.521	271.876	75.8088	97.7491	134.539	188.874	80.1044	87.5317	250.601	196.635	194.523	364.935	214.756	281.702	434.696	354.41	259.683	163.401	244.385	136.287	251.836	337.228	142.555	93.0142	0.959835	147.237	149.598	0.984219	0.397942	254.04	265.987	0.955083	0.245114	144.578	86.8835	1.66404	0.669852
Q91YN0	D6WSU163E	0.158929	-0.0234572	0.000149616	0.481949	0.0304334	527.716	434.902	571.401	477.813	462.972	491.857	236.592	160.686	172.359	150.872	142.154	108.086	170.168	158.133	332.287	176.355	224.748	648.467	192.409	317.125	251.275	341.287	171.165	154.765	145.214	247.703	126.594	547.98	121.67	125.886	0.688324	178.206	196.995	0.904622	0.978919	210.016	207.675	1.01127	0.271962	183.957	151.396	1.21508	0.304772
Q8BPM0	DAAM1	0.449375	-0.351343	-0.081805	-0.013655	0.0228038	487.407	525.597	486.132	481.395	496.413	471.468	188.916	282.902	201.404	342.186	289.16	289.069	201.734	253.038	400.032	469.73	1237.02	660.83	977.346	461.165	629.516	417.954	154.13	157.839	176.429	257.837	164.022	257.849	190.689	179.912	0.404212	283.112	525.79	0.53845	0.590924	239.395	306.832	0.780214	0.459487	532.087	211.561	2.51505	0.806342
A0A0R4J104	DAB2	0.530194	0.585497	-0.118543	0.0943044								446.474	168.135	142.207	323.343	489.803	502.822	134.927	108.713	137.923	526.948	204.524	472.678	401.734	146.73	384.655	286.6	93.3803	141.047	80.6793	208.307	82.5712	416.516	416.065	86.0524	0.0954961	463.162	311.128	1.48865	0.441279	104.625	131.848	0.793524	0.115285	162.592	109.897	1.47949	0.392352
Q3UHC7	DAB2IP	-0.000117703	-0.0407731	0.18655	0.0795816	-0.0729566	499.578	455.813	472.225	519.143	506.638	489.333	258.747	111.712	245.416	288.305	554.564	496.729	316.694	300.86	66.7685	230.882	276.23	39.4381	312.409	65.4375	231.084	173.564	249.83	438.855	159.982	292.77	174.596	618.99	328.262	349.748	0.478955	272.63	297.828	0.915395	0.453351	163.731	112.377	1.45698	0.973725	320.167	322.434	0.992969	0.65196
P61804	DAD1	-0.249659	0.000621654	-0.122088	0.0236439								325.461	211.198	305.015	325.803	1146.6	960.121	270.785	360.008	132.085	196.121	241.223	4.68116	190.337	118.89	55.8901	48.0303	138.324	135.322	159.403	113.475	129.67	192.991	122.61	284.662	0.957578	214.731	209.872	1.02315	0.380586	133.36	163.164	0.817336	0.259099	227.186	305.152	0.744503	0.850933
Q62165	DAG1	-0.0575242	-0.194101	-0.00716692	-0.479809	0.0583976	561.101	480.127	504.176	440.733	517.85	470.511	248.87	119.038	192.75	152.738	485.108	579.598	165.283	123.01	80.563	199.969	219.914	528.718	280.703	75.3451	685.749	583.358	118.725	117.648	193.977	312.617	163.059	157.813	96.9618	366.962	0.371139	181.934	248.686	0.73158	0.847907	120.782	129.453	0.933017	0.647934	176.77	218.418	0.80932	0.186549
G3X9M0	DAP3	0.321217	0.0384641	-0.00256729	-0.216023	0.000123064	433.536	519.033	517.459	458.945	490.622	514.363	232.88	111.189	208.223	196.354	338.848	381.099	189.743	182.776	115.324	224.539	249.841	380.211	253.117	140.573	405.443	407.434	128.331	270.584	129.755	242.207	130.344	333.327	299.238	210.107	0.504744	252.219	230.559	1.09394	0.813937	124.666	127.172	0.980294	0.101029	242.883	194.209	1.25063	0.0651301
Q922B2	DARS	-0.351137	-0.104713	0.0346851	-0.0169584	-0.00586029	486.679	520.569	440.148	507.638	440.583	542.045	145.927	189.49	191.548	217.973	138.243	138.752	202.81	272.387	252.587	173.584	210.06	151.644	174.38	234.511	180.45	169.856	243.804	177.526	279.877	150.286	269.222	172.774	146.75	289.575	0.332311	155.42	180.88	0.859246	0.517647	255.204	234.626	1.08771	0.133239	193.045	254.924	0.757264	0.613977
Q8BIP0	DARS2	-0.000531849	0.000123415	-0.0107117	0.120149	0.342006	507.131	523.338	550.535	479.427	456.796	447.596	168.028	117.091	178.619	170.537	242.918	249.009	179.28	166.128	101.111	162.611	199.479	201.538	209.239	110.416	225.624	205.977	113.839	176.998	106.781	170.854	109.887	424.999	223.158	215.206	0.966233	184.599	183.543	1.00575	0.550905	108.279	111.429	0.971732	0.917756	185.032	186.871	0.990158	0.456993
Q3UGB5	DAZAP1	0.00179553	-0.00730477	0.0321434	0.129802	-0.065115	431.163	508.749	426.381	496.447	421.965	629.187	151.342	244.291	185.947	140.405	156.229	169.412	173.767	173.383	259.135	135.495	153.429	399.064	115.793	226.602	228.633	346.246	310.796	205.492	364.306	190.862	353.713	430.931	139.271	187.931	0.78435	142.036	149.02	0.953136	0.600696	307.881	278.399	1.1059	0.853771	181.623	178.36	1.01829	0.47899
Q4VWZ5	DBI	0.00113219	-0.0493881	-0.217898	0.159077	-0.0640195	493.828	475.267	425.966	571.916	442.622	522.331	247.598	68.2479	202.687	269.032	484.041	493.565	247.523	217.051	57.3327	266.242	267.119	259.608	256.083	69.9987	212.84	155.794	46.5396	265.174	51.3425	236.446	50.809	438.908	170.596	259.238	0.477959	228.146	253.854	0.898727	0.181042	51.5605	63.1963	0.815877	0.88868	244.993	241.271	1.01543	0.447721
Q9QXS6	DBN1	-0.0226194	0.263634	0.011834	0.400478	-0.0509334	451.011	527.385	420.331	492.807	466.325	565.528	209.227	160.522	127.415	94.8871	236.977	212.189	131.489	129.15	272.966	220.589	110.718	168.66	142.515	326.756	145.608	143.736	246.659	190.489	244.282	321.363	263.272	435.883	425.46	213.804	0.372163	285.092	186.255	1.53065	0.756932	260.966	243.853	1.07018	0.700865	142.874	158.148	0.90342	0.290827
Q62418	DBNL	-0.16013	-0.239099	-0.568628	-0.00812531	-0.158919	460.454	499.812	394.601	518.672	473.454	572.3	130.036	555.649	302.911	356.983	263.763	301.018	142.286	294.731	420.794	32.3405	57.4264	125.996	53.1598	490.597	76.5096	115.969	263.546	107.625	395.59	205.143	310.906	57.7453	206.842	233.184	0.473676	123.073	205.095	0.600076	0.0864394	331.749	480.612	0.690263	0.490897	155.987	223.4	0.698241	0.875849
Q923B1	DBR1	0.17667	-0.0805081	-0.265087	0.188159	-0.0027477	478.195	468.823	512.311	445.529	539.422	501.326	131.798	286.63	197.973	180.143	63.0787	73.9797	195.076	169.574	88.5412	175.927	186.9	110.267	234.276	136.541	111.246	114.482	176.725	298.635	194.886	325.005	166.471	295.75	296.903	174.049	0.528114	201.542	246.475	0.8177	0.307498	143.912	206.019	0.698538	0.305949	227.836	179.566	1.26882	0.511541
P53395	DBT	-0.0566547	-0.19436	-0.0539929	-0.0393493	0.00957751	517.605	490.61	507.474	612.147	363.798	460.823	203.932	200.726	132.884	180.552	863.319	694.887	126.697	124.516	88.6629	161.156	137.048	805.373	209.898	83.4882	869.75	692.571	145.491	174.349	146.842	296.54	130.161	286.842	171.551	286.849	0.284812	178.88	228.997	0.781146	0.59913	121.438	143.685	0.845169	0.623666	148.094	179.354	0.825706	0.645485
Q80TR8	DCAF1	0.0382514	-4.11e-05	-0.01791	0.402339								168.897	340.407	261.503	239.533	111.934	94.8389	208.35	217.258	333.382	148.418	214.748	67.0486	84.4297	254.481	81.3872	88.5234	210.239	152.511	231.906	128.092	219.185	377.396	132.321	132.248	0.987838	149.879	150.685	0.99465	0.701266	254.269	275.598	0.922608	0.600359	209.587	185.952	1.12711	0.421199
Q6PAC3	DCAF13	0.39419	0.0196783	0.0719194	0.530249								202.47	276.954	189.918	144.988	158.088	133.622	188.458	167.961	280.61	144.985	221.851	117.681	164.384	283.885	82.29	100.636	337.452	235.118	311.533	161.514	338.225	338.869	155.233	159.502	0.618425	167.562	156.962	1.06754	0.286557	318.762	290.791	1.09619	0.0619691	215.629	171.973	1.25385	0.279323
Q80T85	DCAF5	0.173411	0.133403	-0.55961	-0.00218092								254.251	838.906	193.372	170.109	149.352	106.966	166.82	150.16	227.801	193.685	220.058	107.358	204.254	265.825	74.2439	92.9332	289.05	121.931	476.773	138.132	293.221	4.52314	171.108	98.918	0.323934	206.348	170.831	1.2079	0.263147	270.024	527.168	0.512217	0.334169	178.454	138.633	1.28724	0.930383
P61963	DCAF7	0.0411572	0.233149	0.116815	-0.222706	0.000135239	478.751	502.283	492.434	481.705	487.817	500.669	189.753	142.276	198.593	95.0438	153	175.27	183.472	133.802	270.649	124.902	161.805	262.551	133.372	268.095	257.774	343.99	277.113	150.092	259.544	120.819	261.117	152.592	136.128	146.984	0.232726	150.261	116.412	1.29077	0.37192	269.627	223.305	1.20744	0.500603	170.163	154.752	1.09959	0.321358
Q8N7N5	DCAF8	-2.32e-05	-0.229781	0.000604888	-0.00830849	0.11446	476.97	488.952	620.777	408.825	471.377	497.13	169.403	256.782	171.667	183.826	193.197	185.02	138.009	198.243	267.512	186.56	225.711	135.759	227.759	224.814	163.459	164.684	225.739	162.218	235.253	184.188	230.181	163.292	124.386	224.983	0.182132	160.116	198.591	0.806263	0.899773	241.144	238.95	1.00918	0.987426	186.532	187.078	0.99708	0.727102
Q8BHC4	DCAKD	0.213608	0.0611183	0.000180282	0.134359	-0.0125259	524.502	462.854	464.799	491.001	491.417	516.629	203.818	107.308	243.959	206.271	462.865	562.507	223.412	241.975	148.203	246.792	287.481	165.945	129.821	145.984	108.765	89.2818	97.5063	256.79	81.4852	186.116	92.2091	482.101	151.13	217.144	0.502527	200.58	174.069	1.1523	0.969666	112.64	111.592	1.00938	0.0936819	262.743	227.51	1.15486	0.567807
Q9JLM8	DCLK1	0.0837303	0.150374	-0.0367413	-0.00789484	-0.00283033	473.51	523.536	460.842	483.282	484.238	513.16	172.659	319.804	122	159.24	74.5958	71.9805	121.079	111.025	542.058	299.953	192.334	121.521	173.252	585.485	107.846	102.558	276.754	116.541	410.948	178.58	331.181	70.3836	179.457	131.299	0.373417	217.356	170.357	1.27589	0.647714	383.331	438.746	0.873698	0.456259	143.625	121.134	1.18566	0.804407
[truncated: 3,459 more rows]
[truncated: 21 more columns]
