# Supplementary material for: Organ-level protein networks as a reference for the host effects of the microbiome
Source: HighWire-hosted journal article supplement (doi:10.1101/gr.256875.119), 2020-01-28
Supplement: Supplemental_Table_S2_JDedit.xlsx [file Supplemental_Table_S2_JDedit.xlsx]

## Sheet: READMED
Supplemental Table S2. Per-Organ Gene Set Enrichments Related to Microbial Colonization State.

## Sheet: Small_intestine_GF_enriched
Category	Term	Count	%	PValue	Genes	List Total	Pop Hits	Pop Total	Fold Enrichment	Bonferroni	Benjamini	FDR
GOTERM_MF_DIRECT	GO:0016491~oxidoreductase activity	32	23.5294	1.64335e-10	Q9QYF1, Q8BW75, Q99L04, Q8CHR6, Q64133, O35945, Q9WUD0, P26443, O88451, P21300, O09131, Q148B1, P24549, Q9JHW9, G5E8H9, Q8K3J1, Q9DCS3, Q922D8, P24270, Q9DBW0, Q64442, Q8VC28, Q91X52, P26150, Q9JHI5, A0A0R4J0I6, O88876, G3X9Y6, Q9DCX8, A0A0R4IZY2, Q3U0B3, Q8VCC1	130	272	4028	3.64525	5.58738e-08	5.58738e-08	2.23788e-07
UP_KEYWORDS	Oxidoreductase	30	22.0588	1.50741e-09	Q9QYF1, Q8BW75, Q99L04, Q8CHR6, Q64133, O35945, Q9WUD0, P26443, O88451, P21300, O09131, Q148B1, P24549, Q9JHW9, Q8K3J1, Q9DCS3, Q922D8, P24270, Q9DBW0, Q64442, Q8VC28, Q91X52, P26150, Q9JHI5, A0A0R4J0I6, O88876, Q9DCX8, A0A0R4IZY2, Q3U0B3, Q8VCC1	136	271	4380	3.56523	2.9093e-07	2.9093e-07	1.87835e-06
GOTERM_BP_DIRECT	GO:0055114~oxidation-reduction process	31	22.7941	3.16378e-09	Q9QYF1, Q8BW75, Q99L04, Q8CHR6, Q64133, O35945, Q9WUD0, P26443, O88451, Q9DCJ5, P21300, O09131, P24549, Q9JHW9, Q9DCS3, Q8K3J1, Q922D8, P24270, Q9DBW0, Q64442, Q8VC28, Q91X52, P26150, Q9JHI5, A0A0R4J0I6, O88876, Q9DCX8, A0A0R4IZY2, Q91WT7, Q3U0B3, Q8VCC1	122	312	4081	3.32364	2.42029e-06	2.42029e-06	4.82787e-06
KEGG_PATHWAY	mmu01100:Metabolic pathways	43	31.6176	1.54385e-07	Q9QYF1, F8VPT3, Q8BW75, Q8CHR6, Q64133, B1ASZ3, O35945, Q9WUD0, Q9D1A2, Q9Z2A7, P97494, D3Z7P3, D3Z6V6, P26443, Q9DCJ5, Q64176, P34914, P21300, Q148B1, P24549, P56389, P32020, Q9JHW9, Q9DCS3, Q8K3J1, Q922D8, P20060, Q8BWQ1, P17665, Q64442, Q3U5Q7, Q91X52, Q9Z2V4, Q8K3K7, Q9JLT2, Q8R1G2, Q9JHI5, Q3TTY0, O88876, Q9D1K2, Q8K154, Q8VCN5, Q9Z2I9	81	587	2290	2.071	2.34662e-05	2.34662e-05	0.000184783
KEGG_PATHWAY	mmu00830:Retinol metabolism	9	6.61765	3.35906e-07	Q148B1, Q9QYF1, P24549, O35945, Q9Z2A7, Q9WUD0, Q8K154, O88876, Q8BWQ1	81	22	2290	11.5657	5.10563e-05	2.55285e-05	0.000402045
UP_SEQ_FEATURE	binding site:Substrate	19	13.9706	3.40088e-07	Q9QYF1, Q99L04, B1ASZ3, Q9D1A2, Q8VC28, P42125, Q8R0I0, Q91X52, Q9Z2V4, P26443, Q9JHI5, Q3TTY0, O88451, Q63739, O88876, P21300, Q8VCN5, Q8VCC1, Q8R4N0	120	155	4083	4.17081	0.000131605	0.000131605	0.000472074
GOTERM_BP_DIRECT	GO:0008152~metabolic process	23	16.9118	1.66061e-06	P24472, O35945, Q9D1A2, P42125, Q9D2R0, Q8K3K7, P26150, Q9JLT2, A0A0R4J0I6, Q9JHI5, P34914, O09131, Q9CXS4, Q7M758, P24549, P32020, Q8K154, Q9JHW9, Q3TLP5, Q922D8, Q9Z2I9, P20060, Q8BWQ1	122	243	4081	3.16613	0.00126956	0.000634981	0.00253402
UP_KEYWORDS	NADP	14	10.2941	5.10809e-06	Q9QYF1, Q8CHR6, Q9DBW0, Q8VC28, Q91X52, P26443, O88451, O88876, P21300, Q9DCX8, Q9DCS3, Q922D8, Q3U0B3, P24270	136	95	4380	4.74613	0.000985378	0.00049281	0.00636491
INTERPRO	IPR002347:Glucose/ribitol dehydrogenase	8	5.88235	3.31816e-05	Q9QYF1, Q99L04, Q91X52, G5E8H9, Q3U0B3, O88451, Q8VCC1, O88876	135	31	4323	8.2638	0.0103323	0.0103323	0.0446182
GOTERM_BP_DIRECT	GO:0042572~retinol metabolic process	6	4.41176	3.40918e-05	Q9QYF1, P24549, Q9JHW9, Q3TTY0, O88451, O88876	122	14	4081	14.3361	0.0257435	0.00865588	0.0520108
KEGG_PATHWAY	mmu00982:Drug metabolism - cytochrome P450	8	5.88235	8.10746e-05	Q8BW75, P24472, P13745, Q64133, Q8K154, Q9JHW9, Q8BWQ1, O09131	81	32	2290	7.0679	0.0122482	0.00409952	0.0969952
INTERPRO	IPR016040:NAD(P)-binding domain	13	9.55882	0.000149925	Q9QYF1, Q99L04, Q64442, Q91X52, Q9DCS3, P26150, G5E8H9, P26443, Q922D8, Q3U0B3, O88451, Q8VCC1, O88876	135	112	4323	3.71687	0.0458459	0.0231919	0.201453
KEGG_PATHWAY	mmu00983:Drug metabolism - other enzymes	7	5.14706	0.000156797	Q8CHR6, P56389, Q8K154, E9PV38, Q8BK48, Q8BWQ1, Q64176	81	25	2290	7.91605	0.0235532	0.00594104	0.187509
INTERPRO	IPR020471:Aldo/keto reductase subgroup	5	3.67647	0.000160363	G3X9Y6, Q9JLI0, Q8VC28, Q91WT7, P21300	135	10	4323	16.0111	0.0489587	0.0165934	0.215464
INTERPRO	IPR018170:Aldo/keto reductase, conserved site	5	3.67647	0.000160363	G3X9Y6, Q9JLI0, Q8VC28, Q91WT7, P21300	135	10	4323	16.0111	0.0489587	0.0165934	0.215464
UP_SEQ_FEATURE	site:Important for catalytic activity	5	3.67647	0.000193249	Q8BW75, Q64133, Q9D1A2, P42125, Q3TLP5	120	11	4083	15.4659	0.0720659	0.0367066	0.267915
KEGG_PATHWAY	mmu05204:Chemical carcinogenesis	8	5.88235	0.000215278	Q148B1, P24472, P13745, Q9WUD0, Q8K154, Q9JHW9, Q8BWQ1, O09131	81	37	2290	6.11278	0.0321961	0.00652378	0.257363
UP_SEQ_FEATURE	active site:Proton acceptor	19	13.9706	0.000257312	Q9QYF1, Q99L04, Q9JJX7, O35945, Q9D1A2, Q922K9, Q91X52, Q02111, P26150, Q9D939, Q9JHI5, O88451, O09110, P34914, O88876, P24549, Q9JHW9, P04627, Q8VCC1	120	249	4083	2.59629	0.0947938	0.0326525	0.356583
GOTERM_MF_DIRECT	GO:0003824~catalytic activity	20	14.7059	0.000265057	P70349, Q8CHR6, P42125, Q9D2R0, P26150, Q9JLT2, O88451, P34914, Q7M758, P56389, P32020, Q8VCN5, K3W4L7, Q3TLP5, Q922D8, Q8R2Y0, Q9Z2I9, Q8VCC1, Q8R4N0, Q8CI33	130	247	4028	2.50888	0.0861887	0.0440652	0.360347
PIR_SUPERFAMILY	PIRSF000097:aldo-keto reductase	5	3.67647	0.000321944	G3X9Y6, Q9JLI0, Q8VC28, Q91WT7, P21300	24	10	588	12.25	0.00705887	0.00705887	0.251687
INTERPRO	IPR001395:Aldo/keto reductase	5	3.67647	0.000360113	G3X9Y6, Q9JLI0, Q8VC28, Q91WT7, P21300	135	12	4323	13.3426	0.106613	0.0277904	0.483247
INTERPRO	IPR023210:NADP-dependent oxidoreductase domain	5	3.67647	0.000507724	G3X9Y6, Q9JLI0, Q8VC28, Q91WT7, P21300	135	13	4323	12.3162	0.146968	0.0312915	0.680706
UP_KEYWORDS	Hydrolase	33	24.2647	0.00068461	F8VPT3, P70349, Q91VM9, Q91WU0, Q9D1A2, Q8R0I0, D3Z7P3, P58466, Q924H9, Q63739, P34914, Q64176, Q7M758, P56389, A0A0R4J043, P70665, E9PV38, E9QN99, Q9Z0K8, Q922D8, P20060, P21447, Q9JJX7, O55234, Q9JLT2, Q8R1G2, Q3TTY0, P16406, Q3TQC7, B1AVD2, P09470, Q8BK48, Q8R2Y0	136	587	4380	1.81055	0.123812	0.0431018	0.849741
GOTERM_MF_DIRECT	GO:0004745~retinol dehydrogenase activity	4	2.94118	0.00102222	Q9QYF1, G5E8H9, O88451, O88876	130	7	4028	17.7055	0.293711	0.109445	1.3831
KEGG_PATHWAY	mmu00140:Steroid hormone biosynthesis	5	3.67647	0.00105898	Q148B1, Q9WUD0, Q8K154, A0A0R4IZY2, Q8BWQ1	81	14	2290	10.097	0.148751	0.0264847	1.26016
UP_SEQ_FEATURE	nucleotide phosphate-binding region:NADP	7	5.14706	0.00173631	Q9QYF1, Q8VC28, Q91X52, Q922D8, Q3U0B3, O88451, P21300	120	45	4083	5.29278	0.489587	0.154759	2.3834
GOTERM_BP_DIRECT	GO:0006805~xenobiotic metabolic process	4	2.94118	0.00187425	P24472, Q9JLI0, Q9WUD0, Q8VC28	122	9	4081	14.867	0.761919	0.301476	2.82216
GOTERM_BP_DIRECT	GO:0045471~response to ethanol	7	5.14706	0.00212869	Q8BW75, F8VPT3, P24549, P67778, B1ASZ3, Q9D2R0, P24270	122	46	4081	5.09034	0.804107	0.278222	3.1995
COG_ONTOLOGY	Lipid metabolism	9	6.61765	0.00217508	Q91WU0, P42125, E9PV38, Q3TLP5, A0A0R4J0I6, Q8BK48, Q9JHI5, P34914, Q64176	33	46	576	3.41502	0.0342393	0.0342393	1.53439
GOTERM_BP_DIRECT	GO:0003081~regulation of systemic arterial blood pressure by renin-angiotensin	3	2.20588	0.00256526	P16406, P09470, Q8R0I0	122	3	4081	33.4508	0.859836	0.27927	3.84374
KEGG_PATHWAY	mmu00040:Pentose and glucuronate interconversions	5	3.67647	0.00290935	Q64442, Q8K154, Q91X52, Q8BWQ1, P21300	81	18	2290	7.85322	0.357806	0.0613067	3.42717
GOTERM_MF_DIRECT	GO:0016787~hydrolase activity	31	22.7941	0.00341163	P70349, Q91VM9, Q91WU0, Q9D1A2, Q8R0I0, D3Z7P3, P58466, Q924H9, Q63739, P34914, Q64176, Q7M758, P56389, A0A0R4J043, P70665, E9PV38, E9QN99, Q9Z0K8, Q922D8, P20060, P21447, Q9JJX7, O55234, Q9JLT2, Q8R1G2, Q3TTY0, P16406, Q3TQC7, P09470, Q8BK48, Q8R2Y0	130	572	4028	1.67924	0.687121	0.252099	4.54722
GOTERM_BP_DIRECT	GO:0042493~response to drug	11	8.08824	0.00360044	Q8BW75, F8VPT3, P24549, Q8CHR6, Q64442, P67778, Q9D2R0, A0A0R4IZY2, P24270, Q00623, P55096	122	125	4081	2.94367	0.936664	0.325772	5.35538
KEGG_PATHWAY	mmu00340:Histidine metabolism	4	2.94118	0.004127	Q8BW75, Q64133, Q9D1A2, Q9JHW9	81	10	2290	11.3086	0.466663	0.0755676	4.82933
KEGG_PATHWAY	mmu00980:Metabolism of xenobiotics by cytochrome P450	6	4.41176	0.00504875	P24472, P13745, Q8K154, Q9JHW9, Q8BWQ1, O09131	81	33	2290	5.14029	0.536688	0.081932	5.87831
INTERPRO	IPR019819:Carboxylesterase type B, conserved site	4	2.94118	0.00521775	Q91WU0, E9PV38, Q8BK48, Q64176	135	12	4323	10.6741	0.805521	0.238835	6.79413
INTERPRO	IPR002018:Carboxylesterase, type B	4	2.94118	0.00521775	Q91WU0, E9PV38, Q8BK48, Q64176	135	12	4323	10.6741	0.805521	0.238835	6.79413
INTERPRO	IPR019826:Carboxylesterase type B, active site	4	2.94118	0.00521775	Q91WU0, E9PV38, Q8BK48, Q64176	135	12	4323	10.6741	0.805521	0.238835	6.79413
GOTERM_BP_DIRECT	GO:0051289~protein homotetramerization	6	4.41176	0.0054172	P24549, P56389, Q91X52, D3Z7P3, Q8VCN5, P24270	122	39	4081	5.14628	0.984321	0.405139	7.95477
UP_KEYWORDS	Carboxypeptidase	4	2.94118	0.00652831	Q7M758, Q9D1A2, P09470, Q8R0I0	136	13	4380	9.9095	0.717505	0.270958	7.8373
UP_SEQ_FEATURE	active site:Proton donor	8	5.88235	0.00713832	P16406, P56389, Q8VC28, P58466, P20060, Q63739, P34914, P21300	120	78	4083	3.48974	0.937491	0.425633	9.46578
GOTERM_MF_DIRECT	GO:0004180~carboxypeptidase activity	4	2.94118	0.00725298	Q7M758, Q9D1A2, P09470, Q8R0I0	130	13	4028	9.53373	0.915837	0.390429	9.43749
INTERPRO	IPR002401:Cytochrome P450, E-class, group I	4	2.94118	0.00824992	Q148B1, Q9DBW0, Q9WUD0, A0A0R4IZY2	135	14	4323	9.14921	0.9252	0.309555	10.5434
UP_KEYWORDS	NAD	9	6.61765	0.00843245	P24549, Q64442, O35945, Q8VC28, Q9JHW9, Q8K3J1, P26150, O88451, Q8VCC1	136	95	4380	3.05108	0.804924	0.278825	10.0144
GOTERM_MF_DIRECT	GO:0008392~arachidonic acid epoxygenase activity	3	2.20588	0.00955228	Q148B1, Q9WUD0, A0A0R4IZY2	130	5	4028	18.5908	0.961741	0.419519	12.2525
UP_KEYWORDS	Metalloprotease	6	4.41176	0.00970376	Q7M758, P16406, Q9D1A2, A0A0R4J043, P09470, Q8R0I0	136	43	4380	4.49384	0.84771	0.269234	11.4415
GOTERM_CC_DIRECT	GO:0005903~brush border	6	4.41176	0.01006	Q60604, F8VPT3, P16406, Q3V0K9, Q91X52, Q9JLT2	130	44	4246	4.45385	0.818908	0.818908	11.5939
UP_SEQ_FEATURE	binding site:Substrate; via carbonyl oxygen	4	2.94118	0.0102434	Q9D1A2, Q8R0I0, A0A0R4J0I6, Q9JHI5	120	16	4083	8.50625	0.981401	0.485266	13.3178
GOTERM_CC_DIRECT	GO:0070062~extracellular exosome	57	41.9118	0.0112205	Q8BW75, P70349, Q91VM9, Q9D8B3, P42125, P58466, Q60598, P34914, O09131, P24549, P13745, P32020, P70665, A0A0R4J043, K3W4L7, Q06770, Q62433, Q64442, Q3V0K9, P40237, Q9Z2V4, Q9D939, Q8R1G2, Q8BH43, P16406, Q9D1K2, P67778, B1AVD2, O55022, Q9Z2I9, Q8VCC1, Q00623, Q6P9J9, P62960, Q60604, Q9D1A2, Q8R0I0, Q63739, Q921W0, Q9JHW9, E9QN99, Q9JIL4, Q9Z0K8, Q922D8, P24270, P20060, P21447, Q3UXS0, Q922K9, Q91…	130	1424	4246	1.30738	0.851473	0.614608	12.8488
INTERPRO	IPR017972:Cytochrome P450, conserved site	4	2.94118	0.0121306	Q148B1, Q9DBW0, Q9WUD0, A0A0R4IZY2	135	16	4323	8.00556	0.978074	0.379676	15.1383
GOTERM_MF_DIRECT	GO:0008237~metallopeptidase activity	6	4.41176	0.0124371	Q7M758, P16406, Q9D1A2, A0A0R4J043, P09470, Q8R0I0	130	44	4028	4.22517	0.985809	0.455495	15.6697
GOTERM_MF_DIRECT	GO:0008395~steroid hydroxylase activity	3	2.20588	0.0140294	Q148B1, Q9WUD0, A0A0R4IZY2	130	6	4028	15.4923	0.991801	0.451446	17.5025
UP_SEQ_FEATURE	site:Transition state stabilizer	4	2.94118	0.0143073	P24549, O35945, Q9JHW9, P58466	120	18	4083	7.56111	0.996216	0.549188	18.1297
GOTERM_MF_DIRECT	GO:0052689~carboxylic ester hydrolase activity	5	3.67647	0.0144284	Q91WU0, P70665, E9PV38, Q8BK48, Q64176	130	30	4028	5.1641	0.992855	0.422498	17.956
UP_SEQ_FEATURE	metal ion-binding site:Zinc; catalytic	5	3.67647	0.014612	P16406, Q64442, P56389, A0A0R4J043, Q8R0I0	120	33	4083	5.1553	0.996643	0.509373	18.4803
GOTERM_BP_DIRECT	GO:0006629~lipid metabolic process	12	8.82353	0.0149644	Q9DBW0, P42125, Q9D2R0, Q9Z2V4, Q8K3K7, Q9DCS3, Q3TLP5, Q3TTY0, Q8VCC1, P34914, Q00623, Q3UZZ6	122	177	4081	2.26785	0.99999	0.722403	20.5529
GOTERM_BP_DIRECT	GO:0042573~retinoic acid metabolic process	3	2.20588	0.0166077	P24549, O35945, Q9JHW9	122	7	4081	14.3361	0.999997	0.722283	22.5516
INTERPRO	IPR020904:Short-chain dehydrogenase/reductase, conserved site	4	2.94118	0.0168963	Q91X52, G5E8H9, O88451, Q8VCC1	135	18	4323	7.11605	0.995174	0.447133	20.4821
GOTERM_BP_DIRECT	GO:0006749~glutathione metabolic process	5	3.67647	0.0171534	P24472, P13745, P97494, Q8VCN5, O09131	122	34	4081	4.91924	0.999998	0.699795	23.2048
UP_SEQ_FEATURE	transmembrane region	26	19.1176	0.0190587	Q9QYF1, Q8BW75, Q7TST0, Q64133, Q9Z2A7, Q8R0I0, Q7M758, A0A0R4J043, Q8BWQ1, P55096, P17665, P21447, Q9DBW0, Q3UXS0, P40237, Q8K3K7, P26150, Q3TTY0, O88876, Q9CPQ3, P16406, Q9DCX8, P09470, O55022, Q8R2Y0, Q6P9J9	120	565	4083	1.56575	0.999417	0.56283	23.4408
INTERPRO	IPR001128:Cytochrome P450	4	2.94118	0.0196179	Q148B1, Q9DBW0, Q9WUD0, A0A0R4IZY2	135	19	4323	6.74152	0.997973	0.462132	23.3922
GOTERM_CC_DIRECT	GO:0043231~intracellular membrane-bounded organelle	16	11.7647	0.0196358	Q9WUD0, Q3UXS0, Q9Z2A7, Q922K9, Q60598, O88451, Q148B1, P32020, Q8K154, A0A0R4IZY2, O55022, Q8BK48, P24270, Q8BWQ1, P62960, P55096	130	277	4246	1.88659	0.964967	0.672791	21.4705
GOTERM_CC_DIRECT	GO:0016021~integral component of membrane	33	24.2647	0.0222011	Q9QYF1, F8VPT3, P70349, Q8BW75, Q7TST0, Q64133, Q9Z2A7, Q8R0I0, Q7M758, A0A0R4J043, A2ARJ3, Q9Z0K8, Q8BWQ1, P21447, P55096, P17665, Q9DBW0, Q3UXS0, P40237, P26150, Q8K3K7, Q3TTY0, O88876, Q9CPQ3, P16406, Q9DCX8, Q3TQC7, Q8K154, P09470, A0A0R4IZY2, O55022, Q8R2Y0, Q6P9J9	130	746	4246	1.44481	0.9775	0.612703	23.9385
GOTERM_MF_DIRECT	GO:0016705~oxidoreductase activity, acting on paired donors, with incorporation or reduction of molecular oxygen	4	2.94118	0.0245597	Q148B1, Q9DBW0, Q9WUD0, A0A0R4IZY2	130	20	4028	6.19692	0.999787	0.570638	28.7251
UP_SEQ_FEATURE	topological domain:Mitochondrial intermembrane	4	2.94118	0.0248183	Q8BW75, Q64133, Q9CPQ3, P17665	120	22	4083	6.18636	0.99994	0.621897	29.4501
UP_SEQ_FEATURE	binding site:Substrate; via amide nitrogen	4	2.94118	0.0248183	P42125, Q9Z2V4, A0A0R4J0I6, Q3TTY0	120	22	4083	6.18636	0.99994	0.621897	29.4501
GOTERM_MF_DIRECT	GO:0070403~NAD+ binding	3	2.20588	0.0251105	Q9JHW9, P26443, Q8VCC1	130	8	4028	11.6192	0.999824	0.544361	29.2712
GOTERM_MF_DIRECT	GO:0020037~heme binding	6	4.41176	0.0261748	Q148B1, Q9DBW0, Q9WUD0, A0A0R4IZY2, O55022, P24270	130	53	4028	3.50769	0.999879	0.52834	30.3155
UP_KEYWORDS	Lipid metabolism	11	8.08824	0.0267809	Q9DBW0, P42125, Q9D2R0, Q8K3K7, Q9DCS3, Q3TLP5, Q3TTY0, Q8VCC1, P34914, Q00623, Q3UZZ6	136	162	4380	2.18682	0.994695	0.526903	28.6992
GOTERM_BP_DIRECT	GO:0007584~response to nutrient	5	3.67647	0.0271759	F8VPT3, Q8CHR6, P97494, Q9D2R0, Q00623	122	39	4081	4.28857	1	0.827341	34.3241
COG_ONTOLOGY	Amino acid transport and metabolism	5	3.67647	0.0283037	P16406, Q64133, Q9D1A2, P26443, P21447	33	22	576	3.96694	0.368332	0.205225	18.4451
UP_KEYWORDS	Transmembrane helix	32	23.5294	0.0334396	Q9QYF1, F8VPT3, P70349, Q8BW75, Q7TST0, Q64133, Q9Z2A7, Q8R0I0, Q7M758, A0A0R4J043, A2ARJ3, Q8BWQ1, P55096, P17665, P21447, Q9DBW0, Q3UXS0, P40237, P26150, Q8K3K7, Q3TTY0, O88876, Q9CPQ3, P16406, Q9DCX8, Q3TQC7, Q8K154, P09470, A0A0R4IZY2, O55022, Q8R2Y0, Q6P9J9	136	729	4380	1.4137	0.99859	0.559801	34.5453
KEGG_PATHWAY	mmu00360:Phenylalanine metabolism	3	2.20588	0.0370001	Q8BW75, Q64133, Q9JHW9	81	9	2290	9.42387	0.996755	0.436208	36.3172
KEGG_PATHWAY	mmu04726:Serotonergic synapse	5	3.67647	0.0380221	Q148B1, Q8BW75, Q64133, P04627, A0A0R4IZY2	81	37	2290	3.82049	0.997239	0.414709	37.1214
GOTERM_CC_DIRECT	GO:0031526~brush border membrane	4	2.94118	0.0386968	P09470, Q9JIL4, Q3TTY0, P21447	130	25	4246	5.22585	0.998731	0.73656	38.183
UP_KEYWORDS	Transmembrane	32	23.5294	0.0394677	Q9QYF1, F8VPT3, P70349, Q8BW75, Q7TST0, Q64133, Q9Z2A7, Q8R0I0, Q7M758, A0A0R4J043, A2ARJ3, Q8BWQ1, P55096, P17665, P21447, Q9DBW0, Q3UXS0, P40237, P26150, Q8K3K7, Q3TTY0, O88876, Q9CPQ3, P16406, Q9DCX8, Q3TQC7, Q8K154, P09470, A0A0R4IZY2, O55022, Q8R2Y0, Q6P9J9	136	739	4380	1.39457	0.999578	0.578324	39.4541
GOTERM_BP_DIRECT	GO:0019915~lipid storage	3	2.20588	0.0402582	Q9Z2A7, P20060, Q00623	122	11	4081	9.12295	1	0.910904	46.5829
UP_SEQ_FEATURE	topological domain:Extracellular	12	8.82353	0.0420689	Q7M758, Q9DCX8, P16406, P40237, A0A0R4J043, P09470, Q8R0I0, Q3TTY0, Q8R2Y0, Q6P9J9, Q8BWQ1, P21447	120	211	4083	1.93507	1	0.779552	44.9317
UP_KEYWORDS	Signal	29	21.3235	0.045017	Q9QYF1, F8VPT3, Q7TST0, Q91WU0, Q9WUD0, Q8R0I0, D3Z6V6, Q64176, Q148B1, A0A0R4J043, P70665, E9PV38, G5E8H9, Q9Z0K8, Q06770, P20060, Q8BWQ1, Q8K3K7, Q9JLT2, Q3TTY0, Q9DCX8, Q3TQC7, B1AVD2, Q8K154, P09470, O55022, Q8BK48, Q3U0B3, Q00623	136	661	4380	1.41297	0.999862	0.58893	43.6713
UP_KEYWORDS	Peroxisome	5	3.67647	0.0452704	P32020, A0A0R4J0I6, P24270, P34914, P55096	136	44	4380	3.65976	0.999869	0.5564	43.8573
UP_KEYWORDS	Heme	5	3.67647	0.0485429	Q148B1, Q9DBW0, Q9WUD0, A0A0R4IZY2, P24270	136	45	4380	3.57843	0.999933	0.550814	46.2087
SMART	SM00228:PDZ	4	2.94118	0.0486806	Q8BMA3, P70290, Q9JIL4, Q9CR00	39	50	2284	4.68513	0.904206	0.904206	37.75
UP_KEYWORDS	Mitochondrion	24	17.6471	0.0502749	Q8BW75, Q91VM9, Q9JIK9, Q64133, Q3U5Q7, Q64442, B1ASZ3, P42125, D3Z7P3, P26150, P26443, A0A0R4J0I6, Q9JHI5, Q9DCJ5, Q9CPQ3, P67778, P32020, Q3TLP5, Q9DCS3, Q8K3J1, Q8R2Y0, Q9Z2I9, Q8R4N0, P17665	136	526	4380	1.46947	0.999953	0.53504	47.4162
UP_KEYWORDS	Microsome	5	3.67647	0.0519431	Q9WUD0, A0A0R4IZY2, O55022, Q8BK48, O88451	136	46	4380	3.50064	0.999966	0.520658	48.5556
UP_SEQ_FEATURE	nucleotide phosphate-binding region:NAD	5	3.67647	0.0531368	P24549, O35945, Q9JHW9, P26443, Q8VCC1	120	49	4083	3.47194	1	0.828105	53.1356
KEGG_PATHWAY	mmu04614:Renin-angiotensin system	3	2.20588	0.0540374	P16406, P09470, Q8R0I0	81	11	2290	7.71044	0.999785	0.50523	48.5678
KEGG_PATHWAY	mmu00590:Arachidonic acid metabolism	4	2.94118	0.0543308	Q148B1, Q9WUD0, Q3TTY0, P34914	81	25	2290	4.52346	0.999795	0.479602	48.7584
GOTERM_MF_DIRECT	GO:0005506~iron ion binding	5	3.67647	0.0544436	Q148B1, Q9DBW0, Q8CHR6, Q9WUD0, A0A0R4IZY2	130	45	4028	3.44274	1	0.768722	53.3431
GOTERM_BP_DIRECT	GO:0046686~response to cadmium ion	3	2.20588	0.0549427	Q64442, P97494, P24270	122	13	4081	7.71942	1	0.9544	57.7822
UP_SEQ_FEATURE	metal ion-binding site:Iron (heme axial ligand)	4	2.94118	0.0553588	Q9DBW0, Q9WUD0, A0A0R4IZY2, P24270	120	30	4083	4.53667	1	0.816467	54.6393
GOTERM_BP_DIRECT	GO:0002072~optic cup morphogenesis involved in camera-type eye development	2	1.47059	0.0584271	P24549, Q9JHW9	122	2	4081	33.4508	1	0.953597	60.096
GOTERM_BP_DIRECT	GO:0019852~L-ascorbic acid metabolic process	2	1.47059	0.0584271	P97494, O09131	122	2	4081	33.4508	1	0.953597	60.096
INTERPRO	IPR016160:Aldehyde dehydrogenase, conserved site	3	2.20588	0.0594988	P24549, O35945, Q9JHW9	135	13	4323	7.38974	1	0.825437	56.1774
GOTERM_CC_DIRECT	GO:0031315~extrinsic component of mitochondrial outer membrane	2	1.47059	0.059847	P67778, P32020	130	2	4246	32.6615	0.99997	0.82417	52.864
UP_KEYWORDS	Flavoprotein	6	4.41176	0.0603232	Q8BW75, Q9DCX8, Q8CHR6, Q64133, A0A0R4J0I6, Q9JHI5	136	69	4380	2.80051	0.999994	0.55092	53.9436
INTERPRO	IPR001548:Peptidase M2, peptidyl-dipeptidase A	2	1.47059	0.0610401	P09470, Q8R0I0	135	2	4323	32.0222	1	0.806561	57.1335
GOTERM_BP_DIRECT	GO:0032024~positive regulation of insulin secretion	3	2.20588	0.0628854	Q9D2R0, P26443, Q9CR00	122	14	4081	7.16803	1	0.955194	62.8839
GOTERM_BP_DIRECT	GO:0043171~peptide catabolic process	3	2.20588	0.0628854	P16406, Q9D1A2, P09470	122	14	4081	7.16803	1	0.955194	62.8839
GOTERM_MF_DIRECT	GO:0018479~benzaldehyde dehydrogenase (NAD+) activity	2	1.47059	0.0630337	P24549, O35945	130	2	4028	30.9846	1	0.79427	58.7958
GOTERM_MF_DIRECT	GO:0008241~peptidyl-dipeptidase activity	2	1.47059	0.0630337	P09470, Q8R0I0	130	2	4028	30.9846	1	0.79427	58.7958
UP_KEYWORDS	Monooxygenase	4	2.94118	0.0634598	Q148B1, Q9DBW0, Q9WUD0, A0A0R4IZY2	136	30	4380	4.29412	0.999997	0.546541	55.823
UP_SEQ_FEATURE	topological domain:Cytoplasmic	17	12.5	0.0636013	Q9QYF1, Q8BW75, Q64133, P40237, Q3UXS0, Q8R0I0, Q3TTY0, Q9CPQ3, Q7M758, P16406, Q9DCX8, A0A0R4J043, P09470, Q8R2Y0, Q8BWQ1, Q6P9J9, P21447	120	366	4083	1.5804	1	0.837409	59.835
BIOCARTA	m_ace2Pathway:Angiotensin-converting enzyme 2 regulates heart function	2	1.47059	0.0652217	P09470, Q8R0I0	17	2	483	28.4118	0.773228	0.773228	41.0131
INTERPRO	IPR000073:Alpha/beta hydrolase fold-1	3	2.20588	0.0680403	E9QN99, Q8R2Y0, P34914	135	14	4323	6.8619	1	0.816694	61.2378
KEGG_PATHWAY	mmu00471:D-Glutamine and D-glutamate metabolism	2	1.47059	0.0686633	D3Z7P3, P26443	81	2	2290	28.2716	0.99998	0.538058	57.3187
UP_SEQ_FEATURE	domain:GST N-terminal	3	2.20588	0.069076	P24472, P13745, O09131	120	15	4083	6.805	1	0.842244	62.9747
GOTERM_MF_DIRECT	GO:0004497~monooxygenase activity	4	2.94118	0.0695109	Q148B1, Q9DBW0, Q9WUD0, A0A0R4IZY2	130	30	4028	4.13128	1	0.804661	62.51
GOTERM_MF_DIRECT	GO:0004029~aldehyde dehydrogenase (NAD) activity	3	2.20588	0.0720393	P24549, O35945, Q9JHW9	130	14	4028	6.63956	1	0.795825	63.8738
UP_SEQ_FEATURE	region of interest:Substrate binding	6	4.41176	0.0725663	P56389, Q9D1A2, P42125, Q9Z2V4, Q922D8, Q9JHI5	120	77	4083	2.6513	1	0.838321	64.8558
UP_SEQ_FEATURE	active site:Nucleophile	6	4.41176	0.0758118	P24549, O35945, Q9JHW9, O55234, Q3TTY0, P34914	120	78	4083	2.61731	1	0.833833	66.525
UP_KEYWORDS	Multifunctional enzyme	4	2.94118	0.0798535	Q7M758, P26150, Q922D8, P34914	136	33	4380	3.90374	1	0.61125	64.549
KEGG_PATHWAY	mmu04964:Proximal tubule bicarbonate reclamation	3	2.20588	0.0836038	D3Z7P3, Q9Z2V4, P26443	81	14	2290	6.0582	0.999998	0.587165	64.8299
KEGG_PATHWAY	mmu00561:Glycerolipid metabolism	4	2.94118	0.0847947	B1ASZ3, Q9Z2A7, Q8K3K7, P21300	81	30	2290	3.76955	0.999999	0.569051	65.373
UP_SEQ_FEATURE	domain:4Fe-4S ferredoxin-type 2	2	1.47059	0.0849323	Q8CHR6, Q8K3J1	120	3	4083	22.6833	1	0.851665	70.8302
UP_SEQ_FEATURE	region of interest:Phosphate binding	2	1.47059	0.0849323	Q63739, P34914	120	3	4083	22.6833	1	0.851665	70.8302
UP_SEQ_FEATURE	domain:4Fe-4S ferredoxin-type 1	2	1.47059	0.0849323	Q8CHR6, Q8K3J1	120	3	4083	22.6833	1	0.851665	70.8302
UP_SEQ_FEATURE	metal ion-binding site:Iron-sulfur 1 (4Fe-4S)	2	1.47059	0.0849323	Q8CHR6, Q8K3J1	120	3	4083	22.6833	1	0.851665	70.8302
INTERPRO	IPR016162:Aldehyde dehydrogenase, N-terminal	3	2.20588	0.086218	P24549, O35945, Q9JHW9	135	16	4323	6.00417	1	0.866785	70.259
INTERPRO	IPR016163:Aldehyde dehydrogenase, C-terminal	3	2.20588	0.086218	P24549, O35945, Q9JHW9	135	16	4323	6.00417	1	0.866785	70.259
INTERPRO	IPR016161:Aldehyde/histidinol dehydrogenase	3	2.20588	0.086218	P24549, O35945, Q9JHW9	135	16	4323	6.00417	1	0.866785	70.259
INTERPRO	IPR015590:Aldehyde dehydrogenase domain	3	2.20588	0.086218	P24549, O35945, Q9JHW9	135	16	4323	6.00417	1	0.866785	70.259
GOTERM_BP_DIRECT	GO:0007031~peroxisome organization	2	1.47059	0.0863581	P32020, P55096	122	3	4081	22.3005	1	0.982824	74.7971
GOTERM_BP_DIRECT	GO:0051923~sulfation	2	1.47059	0.0863581	Q9D939, Q3UZZ6	122	3	4081	22.3005	1	0.982824	74.7971
GOTERM_BP_DIRECT	GO:0034767~positive regulation of ion transmembrane transport	2	1.47059	0.0863581	Q9JIL4, Q6P9J9	122	3	4081	22.3005	1	0.982824	74.7971
GOTERM_BP_DIRECT	GO:0048048~embryonic eye morphogenesis	2	1.47059	0.0863581	P24549, Q9JHW9	122	3	4081	22.3005	1	0.982824	74.7971
GOTERM_BP_DIRECT	GO:0006537~glutamate biosynthetic process	2	1.47059	0.0863581	D3Z7P3, P26443	122	3	4081	22.3005	1	0.982824	74.7971
GOTERM_BP_DIRECT	GO:0019346~transsulfuration	2	1.47059	0.0863581	Q8VCN5, Q922D8	122	3	4081	22.3005	1	0.982824	74.7971
GOTERM_BP_DIRECT	GO:0002003~angiotensin maturation	2	1.47059	0.0863581	P16406, Q8R0I0	122	3	4081	22.3005	1	0.982824	74.7971
GOTERM_BP_DIRECT	GO:0051496~positive regulation of stress fiber assembly	3	2.20588	0.0887672	Q02111, Q9R1Z8, Q00623	122	17	4081	5.90309	1	0.980758	75.7924
GOTERM_BP_DIRECT	GO:0009725~response to hormone	3	2.20588	0.0887672	O70433, Q64442, P97494	122	17	4081	5.90309	1	0.980758	75.7924
GOTERM_BP_DIRECT	GO:0031100~organ regeneration	3	2.20588	0.0887672	P67778, P09470, Q00623	122	17	4081	5.90309	1	0.980758	75.7924
UP_KEYWORDS	Catecholamine metabolism	2	1.47059	0.0896649	Q64133, Q3UZZ6	136	3	4380	21.4706	1	0.634786	68.9819
UP_KEYWORDS	Mitogen	2	1.47059	0.0896649	P24270, P62960	136	3	4380	21.4706	1	0.634786	68.9819
GOTERM_BP_DIRECT	GO:0043065~positive regulation of apoptotic process	7	5.14706	0.0899861	Q60604, P24549, P32020, P09470, Q9JHW9, Q91VY9, Q6P9J9	122	105	4081	2.23005	1	0.977554	76.2819
INTERPRO	IPR000863:Sulfotransferase domain	2	1.47059	0.0901585	Q9D939, Q3UZZ6	135	3	4323	21.3481	1	0.860764	71.9384
INTERPRO	IPR003080:Glutathione S-transferase, alpha class	2	1.47059	0.0901585	P24472, P13745	135	3	4323	21.3481	1	0.860764	71.9384
INTERPRO	IPR001613:Flavin amine oxidase	2	1.47059	0.0901585	Q8BW75, Q64133	135	3	4323	21.3481	1	0.860764	71.9384
GOTERM_MF_DIRECT	GO:0004033~aldo-keto reductase (NADP) activity	2	1.47059	0.0930557	Q9JLI0, Q8VC28	130	3	4028	20.6564	1	0.858221	73.5552
GOTERM_MF_DIRECT	GO:0008146~sulfotransferase activity	2	1.47059	0.0930557	Q9D939, Q3UZZ6	130	3	4028	20.6564	1	0.858221	73.5552
GOTERM_CC_DIRECT	GO:0005777~peroxisome	5	3.67647	0.0936363	P32020, A0A0R4J0I6, P24270, P34914, P55096	130	57	4246	2.86505	1	0.906855	69.8271
KEGG_PATHWAY	mmu00350:Tyrosine metabolism	3	2.20588	0.094344	Q8BW75, Q64133, Q9JHW9	81	15	2290	5.65432	1	0.587712	69.4583
KEGG_PATHWAY	mmu04975:Fat digestion and absorption	3	2.20588	0.094344	Q9Z2A7, Q8K3K7, Q00623	81	15	2290	5.65432	1	0.587712	69.4583

## Sheet: Small_intestine_Contrl_enriched
Category	Term	Count	%	PValue	Genes	List Total	Pop Hits	Pop Total	Fold Enrichment	Bonferroni	Benjamini	FDR
UP_KEYWORDS	Disulfide bond	27	42.1875	1.33742e-09	Q64299, Q8CB12, Q9CR35, Q9ER05, P70663, P17897, P00688, P01631, A0A140T8M0, O88312, Q9QUK9, Q9Z1R9, Q3TR54, P05208, Q9D8I1, P01592, Q792Y9, O09049, O70570, P49290, Q9CPN9, Q6PKB0, Q8R180, Q91W90, Q2KHK6, B2RS76, Q504N0, Q91X79	64	506	4380	3.6518	1.6584e-07	1.6584e-07	1.54438e-06
INTERPRO	IPR001314:Peptidase S1A, chymotrypsin-type	8	12.5	9.84135e-09	Q792Y9, Q9QUK9, Q9CPN9, Q9ER05, Q9CR35, Q9Z1R9, P05208, Q91X79	64	21	4323	25.7321	1.58446e-06	1.58446e-06	1.1896e-05
INTERPRO	IPR018114:Peptidase S1, trypsin family, active site	8	12.5	9.84135e-09	Q792Y9, Q9QUK9, Q9CPN9, Q9ER05, Q9CR35, Q9Z1R9, P05208, Q91X79	64	21	4323	25.7321	1.58446e-06	1.58446e-06	1.1896e-05
INTERPRO	IPR001254:Peptidase S1	8	12.5	1.42701e-08	Q792Y9, Q9QUK9, Q9CPN9, Q9ER05, Q9CR35, Q9Z1R9, P05208, Q91X79	64	22	4323	24.5625	2.29748e-06	1.14874e-06	1.72493e-05
UP_KEYWORDS	Signal	29	45.3125	1.94399e-08	Q64299, Q9CR35, Q9ER05, A2AQ99, P70663, P17897, A0A140T8M0, P01631, P00688, O88312, Q91XL1, P05208, Q9DBU0, Q9D8I1, A0A075B5U7, A0A0B4J1H7, P01592, O09049, A0A0G2JDN5, O70570, P49290, Q6PKB0, Q8R180, Q91W90, Q9JJF9, A0A075B5K2, Q9D1M7, A0A0G2JFE9, Q504N0, Q91X79	64	661	4380	3.00255	2.41055e-06	1.20527e-06	2.24481e-05
INTERPRO	IPR009003:Trypsin-like cysteine/serine peptidase domain	8	12.5	2.83058e-08	Q792Y9, Q9QUK9, Q9CPN9, Q9ER05, Q9CR35, Q9Z1R9, P05208, Q91X79	64	24	4323	22.5156	4.55722e-06	1.51908e-06	3.42153e-05
SMART	SM00020:Tryp_SPc	8	12.5	3.41714e-08	Q792Y9, Q9QUK9, Q9CPN9, Q9ER05, Q9CR35, Q9Z1R9, P05208, Q91X79	40	22	2284	20.7636	1.196e-06	1.196e-06	3.02677e-05
UP_SEQ_FEATURE	signal peptide	22	34.375	1.97142e-07	P01592, O09049, Q64299, P49290, O70570, Q6PKB0, Q8R180, Q9CR35, Q91W90, P70663, P17897, O88312, Q9QUK9, Q91XL1, A0A075B6A3, A0A0G2JE99, A0A075B5K2, Q9D1M7, P05208, Q9DBU0, Q9D8I1, Q504N0	52	507	4083	3.40715	3.48936e-05	3.48936e-05	0.000242148
UP_KEYWORDS	Serine protease	8	12.5	2.30067e-07	Q792Y9, Q9QUK9, Q9CPN9, Q9ER05, Q9CR35, Q9Z1R9, P05208, Q91X79	64	32	4380	17.1094	2.85279e-05	9.5094e-06	0.000265668
GOTERM_MF_DIRECT	GO:0004252~serine-type endopeptidase activity	8	12.5	2.47171e-07	Q792Y9, Q9QUK9, Q9CPN9, Q9ER05, Q9CR35, Q9Z1R9, P05208, Q91X79	53	36	4028	16.8889	3.04016e-05	3.04016e-05	0.000285004
GOTERM_BP_DIRECT	GO:0007586~digestion	5	7.8125	1.00363e-06	Q792Y9, Q9QUK9, Q9CPN9, Q9CR35, Q9Z1R9	56	7	4081	52.0536	0.000272951	0.000272951	0.00132109
GOTERM_CC_DIRECT	GO:0005615~extracellular space	18	28.125	1.46647e-06	Q792Y9, P01592, P49290, O70570, Q9CPN9, P00920, Q9CR35, P70663, P00688, P17897, O88312, Q9QUK9, B2RS76, Q91XL1, Q9Z1R9, P05208, Q91X79, Q504N0	56	361	4246	3.78057	0.000143704	0.000143704	0.00162148
UP_KEYWORDS	Protease	12	18.75	7.45541e-06	D3YTS1, Q792Y9, Q9QUK9, B2RS76, Q9CPN9, Q9JJF9, Q9ER05, Q9CR35, Q9Z1R9, P05208, Q91X79, Q504N0	64	151	4380	5.43874	0.000924047	0.000231092	0.00860875
GOTERM_BP_DIRECT	GO:0006508~proteolysis	12	18.75	8.13437e-06	D3YTS1, Q792Y9, Q9QUK9, B2RS76, Q9CPN9, Q9JJF9, Q9ER05, Q9CR35, Q9Z1R9, P05208, Q91X79, Q504N0	56	164	4081	5.33232	0.00221011	0.00110567	0.0107069
INTERPRO	IPR007110:Immunoglobulin-like domain	10	15.625	9.39217e-06	A0A140T8M0, P01631, A0A075B5U7, A0A0B4J1H7, O70570, A0A0G2JDN5, Q6PKB0, A0A075B6A3, A0A0G2JE99, A0A075B5K2, A0A0G2JFE9	64	98	4323	6.89254	0.001511	0.000377965	0.0113524
KEGG_PATHWAY	mmu04972:Pancreatic secretion	7	10.9375	2.07746e-05	Q9QUK9, B2RS76, Q9CPN9, P00920, Q9ER05, P05208, Q504N0	27	54	2290	10.9945	0.000768372	0.000768372	0.0186523
SMART	SM00406:IGv	7	10.9375	3.59543e-05	A0A140T8M0, P01631, A0A075B5U7, A0A0B4J1H7, O70570, A0A0G2JDN5, A0A075B5K2, A0A0G2JFE9	40	39	2284	10.2487	0.00125763	0.000629013	0.0318424
KEGG_PATHWAY	mmu04974:Protein digestion and absorption	6	9.375	3.73756e-05	Q9QUK9, B2RS76, Q9CPN9, Q9ER05, P05208, Q504N0	27	36	2290	14.1358	0.00138197	0.000691223	0.0335552
INTERPRO	IPR013106:Immunoglobulin V-set	7	10.9375	3.93159e-05	A0A140T8M0, P01631, A0A075B5U7, A0A0B4J1H7, O70570, A0A0G2JDN5, A0A075B5K2, A0A0G2JFE9	64	45	4323	10.5073	0.00630999	0.00126519	0.0475136
UP_SEQ_FEATURE	disulfide bond	16	25	4.07352e-05	P01592, O09049, Q64299, P49290, O70570, Q6PKB0, Q8R180, Q9CR35, Q91W90, P70663, P17897, P01631, A0A140T8M0, A0A075B6A3, A0A0G2JE99, P05208, Q504N0	52	384	4083	3.27163	0.00718435	0.00359865	0.0500232
INTERPRO	IPR013783:Immunoglobulin-like fold	10	15.625	0.000161716	A0A140T8M0, P01631, A0A075B5U7, A0A0B4J1H7, O70570, A0A0G2JDN5, Q6PKB0, A0A075B6A3, A0A0G2JE99, A0A075B5K2, A0A0G2JFE9	64	140	4323	4.82478	0.0257023	0.00433032	0.195303
UP_KEYWORDS	Secreted	13	20.3125	0.000357219	P01592, Q64299, O09049, O70570, Q9CR35, P70663, P00688, P17897, O88312, Q9D8I1, P05208, Q504N0, Q91X79	64	269	4380	3.30739	0.043336	0.00882147	0.41172
GOTERM_MF_DIRECT	GO:0008236~serine-type peptidase activity	5	7.8125	0.000528282	D3YTS1, Q9ER05, Q9CR35, P05208, Q91X79	53	30	4028	12.6667	0.0629286	0.0319755	0.60745
GOTERM_CC_DIRECT	GO:0005576~extracellular region	12	18.75	0.00117496	P70663, P17897, P01592, O09049, Q64299, O70570, O88312, Q9CR35, P05208, Q9D8I1, Q91X79, Q504N0	56	296	4246	3.07384	0.108824	0.055979	1.29152
GOTERM_MF_DIRECT	GO:0003823~antigen binding	4	6.25	0.00169977	A0A140T8M0, P01631, P01592, Q6PKB0, A0A075B6A3	53	19	4028	16	0.188807	0.0673729	1.94249
INTERPRO	IPR007677:Gasdermin	3	4.6875	0.00203215	Q2KHK6, Q8CB12, Q3TR54	64	5	4323	40.5281	0.279283	0.0457093	2.42892
UP_KEYWORDS	Necrosis	3	4.6875	0.00686912	Q2KHK6, Q8CB12, Q3TR54	64	9	4380	22.8125	0.574593	0.13277	7.65092
GOTERM_MF_DIRECT	GO:0008233~peptidase activity	7	10.9375	0.0115763	D3YTS1, Q9JJF9, Q9ER05, Q9CR35, P05208, Q91X79, Q504N0	53	149	4028	3.57047	0.761216	0.300961	12.5638
GOTERM_BP_DIRECT	GO:0012501~programmed cell death	3	4.6875	0.0146306	Q2KHK6, Q8CB12, Q3TR54	56	14	4081	15.6161	0.981847	0.737185	17.6349
BIOCARTA	m_pepiPathway:Proepithelin Conversion to Epithelin and Wound Repair Control	2	3.125	0.0246903	P05208, Q91X79	4	4	483	60.375	0.181271	0.181271	12.7912
UP_KEYWORDS	Hydrolase	15	23.4375	0.0360752	D3YTS1, E9PYH2, Q792Y9, Q9CPN9, Q9ER05, Q9CR35, P00688, P17897, Q9QUK9, B2RS76, Q9JJF9, Q9Z1R9, P05208, Q504N0, Q91X79	64	587	4380	1.74883	0.989496	0.478403	34.5757
UP_KEYWORDS	Zymogen	4	6.25	0.0418511	Q9CR35, P05208, Q91X79, Q504N0	64	54	4380	5.06944	0.995015	0.48452	38.9622
INTERPRO	IPR003146:Proteinase inhibitor, carboxypeptidase propeptide	2	3.125	0.0430954	B2RS76, Q504N0	64	3	4323	45.0312	0.999169	0.58792	41.2855
INTERPRO	IPR003006:Immunoglobulin/major histocompatibility complex, conserved site	3	4.6875	0.0505839	Q6PKB0, A0A075B6A3, A0A0G2JE99	64	25	4323	8.10562	0.999765	0.604885	46.6049
GOTERM_BP_DIRECT	GO:0034975~protein folding in endoplasmic reticulum	2	3.125	0.0528474	Q99KI3, Q8R180	56	4	4081	36.4375	1	0.975079	51.0659
INTERPRO	IPR003597:Immunoglobulin C1-set	3	4.6875	0.0581016	Q6PKB0, A0A075B6A3, A0A0G2JE99	64	27	4323	7.50521	0.999935	0.618526	51.4971
UP_SEQ_FEATURE	region of interest:Complementarity-determining-1	2	3.125	0.0609424	A0A140T8M0, P01631, A0A075B6A3	52	5	4083	31.4077	0.999985	0.975518	53.8064
UP_SEQ_FEATURE	region of interest:Framework-2	2	3.125	0.0609424	A0A140T8M0, P01631, A0A075B6A3	52	5	4083	31.4077	0.999985	0.975518	53.8064
UP_SEQ_FEATURE	region of interest:Complementarity-determining-2	2	3.125	0.0609424	A0A140T8M0, P01631, A0A075B6A3	52	5	4083	31.4077	0.999985	0.975518	53.8064
UP_SEQ_FEATURE	region of interest:Framework-3	2	3.125	0.0609424	A0A140T8M0, P01631, A0A075B6A3	52	5	4083	31.4077	0.999985	0.975518	53.8064
UP_SEQ_FEATURE	region of interest:Framework-1	2	3.125	0.0609424	A0A140T8M0, P01631, A0A075B6A3	52	5	4083	31.4077	0.999985	0.975518	53.8064
UP_SEQ_FEATURE	metal ion-binding site:Zinc; catalytic	3	4.6875	0.0631691	P16015, P00920, Q504N0	52	33	4083	7.13811	0.99999	0.94428	55.134
INTERPRO	IPR003599:Immunoglobulin subtype	4	6.25	0.0656237	A0A140T8M0, P01631, O70570, A0A075B6A3, A0A075B5K2	64	64	4323	4.22168	0.999982	0.629706	55.9774
GOTERM_BP_DIRECT	GO:0030282~bone mineralization	2	3.125	0.0656247	P39654, A2AQ99	56	5	4081	29.15	1	0.975091	59.0771
GOTERM_BP_DIRECT	GO:0006465~signal peptide processing	2	3.125	0.0656247	D3YTS1, Q9JJF9	56	5	4081	29.15	1	0.975091	59.0771
SMART	SM00407:IGc1	3	4.6875	0.0666035	Q6PKB0, A0A075B6A3, A0A0G2JE99	40	25	2284	6.852	0.910398	0.552522	45.6928
INTERPRO	IPR009020:Proteinase inhibitor, propeptide	2	3.125	0.0708048	B2RS76, Q504N0	64	5	4323	27.0188	0.999993	0.626663	58.839
INTERPRO	IPR010255:Haem peroxidase	2	3.125	0.0708048	P49290, A2AQ99	64	5	4323	27.0188	0.999993	0.626663	58.839
INTERPRO	IPR019791:Haem peroxidase, animal, subgroup	2	3.125	0.0708048	P49290, A2AQ99	64	5	4323	27.0188	0.999993	0.626663	58.839
INTERPRO	IPR000834:Peptidase M14, carboxypeptidase A	2	3.125	0.0708048	B2RS76, Q504N0	64	5	4323	27.0188	0.999993	0.626663	58.839
UP_SEQ_FEATURE	domain:Ig-like	2	3.125	0.0726863	A0A075B6A3, A0A0G2JE99	52	6	4083	26.1731	0.999998	0.930845	60.4225
GOTERM_MF_DIRECT	GO:0004181~metallocarboxypeptidase activity	2	3.125	0.0750456	B2RS76, Q504N0	53	6	4028	25.3333	0.999932	0.853256	59.3233
SMART	SM00631:Zn_pept	2	3.125	0.0825801	B2RS76, Q504N0	40	5	2284	22.84	0.951035	0.529596	53.3939
GOTERM_MF_DIRECT	GO:0004089~carbonate dehydratase activity	2	3.125	0.0870043	P16015, P00920	53	7	4028	21.7143	0.999986	0.845258	64.991
GOTERM_BP_DIRECT	GO:0034976~response to endoplasmic reticulum stress	3	4.6875	0.0880405	Q8R180, P39654, Q91W90	56	37	4081	5.90878	1	0.984669	70.2731
SMART	SM00409:IG	4	6.25	0.0939176	A0A140T8M0, P01631, O70570, A0A075B6A3, A0A075B5K2	40	64	2284	3.56875	0.968314	0.498612	58.2547
INTERPRO	IPR018338:Carbonic anhydrase, alpha-class, conserved site	2	3.125	0.0977242	P16015, P00920	64	7	4323	19.2991	1	0.72017	71.1495
INTERPRO	IPR023561:Carbonic anhydrase, alpha-class	2	3.125	0.0977242	P16015, P00920	64	7	4323	19.2991	1	0.72017	71.1495
KEGG_PATHWAY	mmu04080:Neuroactive ligand-receptor interaction	2	3.125	0.0978269	Q9QUK9, Q9CPN9	27	9	2290	18.8477	0.977832	0.719085	60.3228

## Sheet: Colon_GF_enriched
Category	Term	Count	%	PValue	Genes	List Total	Pop Hits	Pop Total	Fold Enrichment	Bonferroni	Benjamini	FDR
GOTERM_MF_DIRECT	GO:0005215~transporter activity	8	9.09091	1.67538e-06	Q62277, Q9JIP7, A2AKN8, Q4FZE8, Q08652, P12710, P11404, Q05816	81	31	4028	12.8331	0.000380239	0.000380239	0.00214338
INTERPRO	IPR011038:Calycin-like	6	6.81818	7.53762e-06	A2AKN8, Q4FZE8, Q08652, P12710, P11404, Q05816	88	15	4323	19.65	0.00188264	0.00188264	0.00979165
INTERPRO	IPR012674:Calycin	6	6.81818	7.53762e-06	A2AKN8, Q4FZE8, Q08652, P12710, P11404, Q05816	88	15	4323	19.65	0.00188264	0.00188264	0.00979165
INTERPRO	IPR000566:Lipocalin/cytosolic fatty-acid binding protein domain	5	5.68182	6.69949e-05	A2AKN8, Q4FZE8, Q08652, P11404, Q05816	88	12	4323	20.4688	0.0166098	0.00833967	0.0869979
UP_KEYWORDS	Metalloprotease	7	7.95455	0.000174554	Q9WVJ3, Q7M758, A0A0R4J043, Q3UE92, Q8R0I0, Q91YP2, Q8K411	88	43	4380	8.10254	0.0287322	0.0287322	0.212106
GOTERM_MF_DIRECT	GO:0008237~metallopeptidase activity	7	7.95455	0.00019648	Q9WVJ3, Q7M758, A0A0R4J043, Q3UE92, Q8R0I0, Q91YP2, Q8K411	81	44	4028	7.91134	0.0436251	0.0220558	0.251076
UP_KEYWORDS	Secreted	16	18.1818	0.00021458	Q8CHS7, Q8VCU2, Q4FZE8, Q8R0I0, P06728, P70232, Q08761, E9QN70, Q9WVJ3, A2AKN8, Q91XA9, Q99MQ4, P28843, Q8C7E4, Q06770, A0A0A6YWR2	88	269	4380	2.96046	0.035204	0.0177597	0.260684
UP_KEYWORDS	Disulfide bond	23	26.1364	0.000247794	Q91WV7, Q9CQ52, Q4FZE8, Q8R0I0, P70232, Q8K411, A0A0R4J138, Q05816, E9QN70, Q08761, O54901, A2AKN8, O35375, Q91XA9, Q9D1I2, A0A0R4J043, Q99MQ4, P61922, P28843, E9QQ96, Q8C7E4, K4DI58, A0A0A6YWR2	88	506	4380	2.2624	0.040542	0.0137009	0.30098
INTERPRO	IPR000463:Cytosolic fatty-acid binding	4	4.54545	0.000409941	Q08652, P12710, P11404, Q05816	88	8	4323	24.5625	0.0974276	0.0335916	0.531246
UP_SEQ_FEATURE	disulfide bond	18	20.4545	0.000437981	Q8R0I0, P70232, Q8K411, A0A0R4J138, Q05816, E9QN70, Q08761, O54901, A2AKN8, O35375, Q91XA9, A0A0R4J043, Q99MQ4, P28843, E9QQ96, Q8C7E4, K4DI58, A0A0A6YWR2	76	384	4083	2.5183	0.140646	0.140646	0.596339
KEGG_PATHWAY	mmu04974:Protein digestion and absorption	6	6.81818	0.000686294	Q91WV7, Q9JIP7, Q9CQ52, A0A0R4J043, Q8R0I0, P28843	48	36	2290	7.95139	0.0752801	0.0752801	0.777726
GOTERM_CC_DIRECT	GO:0005576~extracellular region	15	17.0455	0.00136493	Q8CHS7, Q8VCU2, Q4FZE8, Q8R0I0, P06728, P70232, Q08761, E9QN70, Q9WVJ3, A2AKN8, Q91XA9, Q99MQ4, P28843, Q8C7E4, Q06770	83	296	4246	2.5924	0.181909	0.181909	1.61222
UP_SEQ_FEATURE	topological domain:Extracellular	12	13.6364	0.00142305	Q9JIP7, Q7M758, Q9EP72, Q9DCX8, O35375, A0A0R4J043, Q8R0I0, P28843, P70232, K4DI58, Q6P9J9, O54901	76	211	4083	3.05538	0.389041	0.218361	1.92555
UP_SEQ_FEATURE	signal peptide	20	22.7273	0.00152659	Q8CHS7, Q8VCU2, Q8R0I0, P06728, P70232, A0A0R4J138, Q08761, O54901, E9QN70, Q9WVJ3, Q9EP72, Q9DCX8, A2AKN8, O35375, Q91XA9, A0A0R4J043, Q99MQ4, Q8C7E4, Q06770, K4DI58	76	507	4083	2.11928	0.410572	0.16155	2.0643
UP_KEYWORDS	Signal	25	28.4091	0.00176414	Q9CQ52, F8VPQ6, Q8R0I0, E9QN70, Q08761, O54901, Q9EP72, Q91XA9, Q99MQ4, A0A0R4J043, Q06770, Q8CHS7, Q8VCU2, Q4FZE8, P70232, P06728, A0A0R4J138, Q9WVJ3, A2AKN8, Q9DCX8, O35375, Q9D1I2, A0A075B5M7, Q8C7E4, K4DI58	88	661	4380	1.88248	0.255373	0.0710664	2.12475
UP_SEQ_FEATURE	topological domain:Cytoplasmic	16	18.1818	0.00221701	Q9JIP7, Q64133, Q8R0I0, P70232, O54901, Q62277, Q924X2, Q7M758, Q9EP72, O35375, Q9DCX8, A0A0R4J043, P28843, K4DI58, Q6P9J9, A0A0A6YWR2	76	366	4083	2.34858	0.53603	0.17468	2.98488
UP_SEQ_FEATURE	metal ion-binding site:Zinc; catalytic	5	5.68182	0.00287081	Q64442, A0A0R4J043, Q8R0I0, Q91YP2, Q8K411	76	33	4083	8.13995	0.630176	0.180406	3.84923
SMART	SM00408:IGc2	5	5.68182	0.00290397	Q14BI5, E9QQ96, A0A075B5M7, P70232, K4DI58	39	37	2284	7.91407	0.142843	0.142843	2.7975
UP_SEQ_FEATURE	glycosylation site:N-linked (GlcNAc...)	19	21.5909	0.00300113	Q9JIP7, Q8VCU2, Q8R0I0, P70232, A0A0R4J138, E9QN70, Q08761, O54901, Q62277, Q9WVJ3, Q7M758, O35375, A0A0R4J043, Q99MQ4, P28843, Q06770, Q6P9J9, K4DI58, A0A0A6YWR2	76	496	4083	2.05796	0.646529	0.159136	4.02067
GOTERM_MF_DIRECT	GO:0003824~catalytic activity	13	14.7727	0.00309579	Q91WV7, P30275, Q922Q1, Q8R0F8, Q8K411, A0A0R4J138, P16125, Q7M758, P08249, Q8K157, P61922, Q8VCC1, Q08189	81	247	4028	2.61728	0.505315	0.209122	3.88911
UP_KEYWORDS	Glycoprotein	22	25	0.0035834	Q91WV7, Q9JIP7, Q8VCU2, Q8R0I0, P70232, Q9WVC8, A0A0R4J138, E9QN70, Q08761, O54901, Q62277, Q9WVJ3, Q7M758, O35375, P08249, A0A0R4J043, Q99MQ4, P28843, Q06770, Q6P9J9, K4DI58, A0A0A6YWR2	88	577	4380	1.89775	0.450916	0.112991	4.27242
SMART	SM00409:IG	6	6.81818	0.00362569	Q14BI5, E9QQ96, A0A075B5M7, P70232, K4DI58, O54901	39	64	2284	5.49038	0.175115	0.0917679	3.48177
UP_KEYWORDS	Transmembrane	26	29.5455	0.00373033	Q9JIP7, Q791T5, A0A0J9YVE6, Q64133, Q8R0I0, Q08761, O54901, Q7M758, Q9EP72, Q99MQ4, A0A0R4J043, P28843, B5THE2, A0A0A6YWR2, Q91WV7, Q9WVC8, P70232, Q62277, Q9CQC7, F7C846, Q924X2, Q9DCX8, O35375, Q9D1I2, F8VQM5, Q6P9J9, K4DI58	88	739	4380	1.75114	0.464272	0.0987941	4.44397
UP_SEQ_FEATURE	transmembrane region	20	22.7273	0.00533326	Q9JIP7, Q791T5, Q64133, Q8R0I0, P70232, Q9WVC8, O54901, F7C846, Q9CQC7, Q62277, Q924X2, Q7M758, Q9EP72, Q9DCX8, O35375, A0A0R4J043, P28843, K4DI58, Q6P9J9, A0A0A6YWR2	76	565	4083	1.90172	0.842801	0.232273	7.04104
GOTERM_CC_DIRECT	GO:0070062~extracellular exosome	40	45.4545	0.00547226	P30275, A0A0J9YVE6, P17563, Q922Q1, Q8R0I0, P58466, Q05816, Q08761, E9QN70, O09131, P02535, P08249, A0A0R4J043, B5THE2, P28843, P12710, P11404, Q06770, Q08189, Q91WV7, Q8VCU2, P63005, P04104, Q64442, Q3UE92, P70232, P06728, A0A0R4J138, Q3UKW2, P16125, Q9WVJ3, P48774, Q9CQC7, A0A140T8J4, Q8K157, P21279, P61922, F8VQM5, Q8C7E4, Q8VCC1, Q6P9J9	83	1424	4246	1.43698	0.553641	0.331899	6.32119
GOTERM_CC_DIRECT	GO:0016021~integral component of membrane	25	28.4091	0.00582904	Q791T5, Q9JIP7, A0A0J9YVE6, Q64133, Q8R0I0, O54901, Q08761, Q7M758, Q9EP72, A0A0R4J043, P28843, B5THE2, A0A0A6YWR2, Q91WV7, Q9WVC8, P70232, Q62277, Q9CQC7, F7C846, Q924X2, O35375, Q9DCX8, Q9D1I2, F8VQM5, K4DI58, Q6P9J9	83	746	4246	1.71436	0.576574	0.249082	6.72034
INTERPRO	IPR003598:Immunoglobulin subtype 2	5	5.68182	0.00609139	Q14BI5, E9QQ96, A0A075B5M7, P70232, K4DI58	88	37	4323	6.63851	0.782923	0.31742	7.63065
KEGG_PATHWAY	mmu03320:PPAR signaling pathway	5	5.68182	0.00626502	Q924X2, P12710, A0A0R4J083, P11404, Q05816	48	37	2290	6.44707	0.511521	0.301087	6.89794
UP_KEYWORDS	Transmembrane helix	25	28.4091	0.00653133	Q791T5, Q9JIP7, A0A0J9YVE6, Q64133, Q8R0I0, O54901, Q08761, Q7M758, Q9EP72, A0A0R4J043, P28843, B5THE2, A0A0A6YWR2, Q91WV7, Q9WVC8, P70232, Q62277, Q9CQC7, F7C846, Q924X2, O35375, Q9DCX8, Q9D1I2, F8VQM5, K4DI58, Q6P9J9	88	729	4380	1.70688	0.665229	0.144723	7.66087
GOTERM_BP_DIRECT	GO:0010880~regulation of release of sequestered calcium ion into cytosol by sarcoplasmic reticulum	3	3.40909	0.00747704	Q8CHS7, Q3UKW2, O09131	81	7	4081	21.5926	0.976718	0.976718	10.2469
GOTERM_CC_DIRECT	GO:0005743~mitochondrial inner membrane	11	12.5	0.00781282	Q9D8W7, P30275, F7C846, Q91WV7, Q791T5, Q9CQC7, Q922Q1, P08249, Q8R0F8, A0A0R4J275, Q3UUI3	83	215	4246	2.61732	0.68431	0.250425	8.91135
GOTERM_MF_DIRECT	GO:0008233~peptidase activity	9	10.2273	0.00881613	Q9WVJ3, Q9CQ52, Q7M758, A0A0R4J043, Q3UE92, Q8R0I0, P28843, Q91YP2, Q8K411	81	149	4028	3.00373	0.866029	0.395004	10.7108
INTERPRO	IPR003599:Immunoglobulin subtype	6	6.81818	0.00882915	Q14BI5, E9QQ96, A0A075B5M7, P70232, K4DI58, O54901	88	64	4323	4.60547	0.891074	0.358161	10.882
UP_KEYWORDS	Protease	9	10.2273	0.00964965	Q9WVJ3, Q9CQ52, Q7M758, A0A0R4J043, Q3UE92, Q8R0I0, P28843, Q91YP2, Q8K411	88	151	4380	2.96659	0.801966	0.183244	11.1251
GOTERM_BP_DIRECT	GO:0005975~carbohydrate metabolic process	7	7.95455	0.00971441	Q91WV7, A0A0J9YVE6, P08249, Q91XA9, Q8K157, F8VQM5, B5THE2, P16125	81	94	4081	3.7519	0.992484	0.913305	13.1176
GOTERM_BP_DIRECT	GO:0015909~long-chain fatty acid transport	3	3.40909	0.00984321	Q924X2, P12710, P11404	81	8	4081	18.8935	0.992958	0.808326	13.2803
GOTERM_MF_DIRECT	GO:0042803~protein homodimerization activity	13	14.7727	0.00994521	Q9D7I5, P63005, Q3UE92, F8VPQ6, P06728, O54901, P48774, Q9WVJ3, Q8K157, P61922, P28843, Q6P9J9, K4DI58	81	286	4028	2.26038	0.89657	0.364773	12.0033
INTERPRO	IPR011013:Galactose mutarotase-like domain	3	3.40909	0.0131492	A0A0J9YVE6, Q8K157, F8VQM5, B5THE2	88	9	4323	16.375	0.963451	0.423925	15.7982
INTERPRO	IPR017853:Glycoside hydrolase, superfamily	4	4.54545	0.0131516	Q91WV7, A0A0J9YVE6, Q91XA9, F8VQM5, B5THE2	88	25	4323	7.86	0.963474	0.376756	15.8009
INTERPRO	IPR007110:Immunoglobulin-like domain	7	7.95455	0.0134049	Q14BI5, E9QQ96, A0A075B5M7, P70232, K4DI58, O54901, A0A0A6YWR2	88	98	4323	3.50893	0.965744	0.344093	16.0812
GOTERM_BP_DIRECT	GO:0006508~proteolysis	9	10.2273	0.0141589	Q9WVJ3, Q9CQ52, Q7M758, A0A0R4J043, Q3UE92, Q8R0I0, P28843, Q91YP2, Q8K411	81	164	4081	2.76491	0.999211	0.832383	18.5685
GOTERM_MF_DIRECT	GO:0016491~oxidoreductase activity	12	13.6364	0.0174725	Q64464, Q8CHS7, Q922Q1, Q9DCX8, P08249, Q64442, Q64133, A0A0R4J083, P16125, Q8VCC1, O09131, E9Q5Z6	81	272	4028	2.1939	0.981708	0.486696	20.1892
UP_KEYWORDS	Hydrolase	20	22.7273	0.0193846	Q9D7I5, Q9CQ52, A0A0J9YVE6, Q8VCU2, Q8R0F8, Q8R0I0, F8VPQ6, Q3UE92, P58466, Q8K411, A0A0R4J138, Q9WVJ3, Q7M758, Q91XA9, A0A0R4J043, F8VQM5, B5THE2, P28843, Q91YP2, Q3UUI3, Q8C7E4	88	587	4380	1.69583	0.961956	0.30457	21.1871
GOTERM_CC_DIRECT	GO:0005615~extracellular space	14	15.9091	0.0197018	Q9WVJ3, Q9CQ52, P02535, P17563, Q8VCU2, Q91XA9, P04104, Q8R0I0, P06728, P11404, Q06770, E9QN70, Q08761, A0A0A6YWR2	83	361	4246	1.98391	0.946339	0.442902	21.0843
INTERPRO	IPR013098:Immunoglobulin I-set	4	4.54545	0.0197248	Q14BI5, E9QQ96, P70232, K4DI58	88	29	4323	6.77586	0.993129	0.425001	22.8026
UP_KEYWORDS	Zymogen	5	5.68182	0.0216022	Q9WVJ3, Q9CQ52, A0A0R4J043, Q08761, Q08189	88	54	4380	4.60859	0.973933	0.305602	23.3277
INTERPRO	IPR013783:Immunoglobulin-like fold	8	9.09091	0.0217276	Q14BI5, E9QQ96, A0A075B5M7, P70232, K4DI58, O54901, A0A0A6YWR2, Q08189	88	140	4323	2.80714	0.995879	0.422576	24.8267
UP_KEYWORDS	Chloride	3	3.40909	0.0226211	Q8R0I0, Q9WVC8, Q6P9J9	88	12	4380	12.4432	0.978096	0.293458	24.2933
GOTERM_MF_DIRECT	GO:0005504~fatty acid binding	3	3.40909	0.026369	P12710, P11404, Q05816	81	13	4028	11.4758	0.99768	0.579616	28.9567
GOTERM_MF_DIRECT	GO:0004180~carboxypeptidase activity	3	3.40909	0.026369	Q9WVJ3, Q7M758, Q8R0I0	81	13	4028	11.4758	0.99768	0.579616	28.9567
UP_KEYWORDS	Carboxypeptidase	3	3.40909	0.0263931	Q9WVJ3, Q7M758, Q8R0I0	88	13	4380	11.486	0.988517	0.31081	27.7715
UP_KEYWORDS	Mitochondrion	18	20.4545	0.02743	Q791T5, P30275, Q922Q1, Q64133, Q64442, Q8R0F8, A0A0R4J275, Q8K411, Q9CQC7, F7C846, Q924X2, P08249, Q9D1I2, P61922, Q91YP2, Q3UUI3, A0A0R4J083, Q3ULD5	88	526	4380	1.70325	0.990389	0.300433	28.7016
UP_SEQ_FEATURE	active site:Proton acceptor	10	11.3636	0.0371245	Q924X2, Q8CHS7, P08249, Q8K157, E9QQ96, Q8K411, Q3UMW7, Q8C7E4, P16125, Q8VCC1	76	249	4083	2.15758	0.999998	0.805281	40.3409
UP_KEYWORDS	Immunoglobulin domain	5	5.68182	0.0374124	E9QQ96, P70232, K4DI58, O54901, A0A0A6YWR2	88	64	4380	3.88849	0.998284	0.36545	37.1101
GOTERM_BP_DIRECT	GO:0055114~oxidation-reduction process	12	13.6364	0.0392865	Q64464, Q8CHS7, Q922Q1, Q9DCX8, P08249, Q64442, Q64133, A0A0R4J275, A0A0R4J083, P16125, Q8VCC1, O09131	81	312	4081	1.9378	1	0.981974	43.8597
GOTERM_MF_DIRECT	GO:0001618~virus receptor activity	2	2.27273	0.0393323	Q8R0I0, P28843	81	2	4028	49.7284	0.999889	0.679732	40.1521
GOTERM_MF_DIRECT	GO:0005550~pheromone binding	2	2.27273	0.0393323	A2AKN8, Q4FZE8	81	2	4028	49.7284	0.999889	0.679732	40.1521
INTERPRO	IPR002971:Major urinary protein	2	2.27273	0.0398494	A2AKN8, Q4FZE8	88	2	4323	49.125	0.999962	0.603154	41.0381
GOTERM_CC_DIRECT	GO:0005739~mitochondrion	24	27.2727	0.0404826	P30275, Q9D8W7, Q791T5, Q922Q1, Q64133, Q8R0F8, Q64442, A0A0R4J275, Q8K411, A0A0R4J138, P16125, O55126, F7C846, Q9CQC7, A0A140T8J4, Q924X2, Q14BI5, P08249, Q9D1I2, P61922, Q91YP2, Q3UUI3, A0A0R4J083, Q3ULD5	83	834	4246	1.47213	0.9977	0.636675	38.8452
UP_KEYWORDS	Oxidoreductase	11	12.5	0.0408243	Q64464, Q8CHS7, Q922Q1, Q9DCX8, P08249, Q64442, Q64133, A0A0R4J083, P16125, Q8VCC1, O09131	88	271	4380	2.0203	0.999052	0.371267	39.7684
GOTERM_MF_DIRECT	GO:0030246~carbohydrate binding	5	5.68182	0.043044	Q9EP72, A0A0J9YVE6, P04104, Q8K157, F8VQM5, B5THE2	81	67	4028	3.71107	0.999954	0.67035	43.0439
GOTERM_MF_DIRECT	GO:0004222~metalloendopeptidase activity	3	3.40909	0.0436894	A0A0R4J043, Q91YP2, Q8K411	81	17	4028	8.7756	0.999961	0.637259	43.5333
SMART	SM00018:PD	2	2.27273	0.0491078	A0A0J9YVE6, F8VQM5, B5THE2	39	3	2284	39.0427	0.930664	0.589179	38.816
GOTERM_MF_DIRECT	GO:0008289~lipid binding	6	6.81818	0.0508599	P06728, Q08652, P12710, P11404, Q06770, Q05816	81	102	4028	2.9252	0.999993	0.65945	48.7169
GOTERM_BP_DIRECT	GO:0007156~homophilic cell adhesion via plasma membrane adhesion molecules	3	3.40909	0.0523207	P70232, K4DI58, O54901	81	19	4081	7.95517	1	0.988748	53.8873
UP_KEYWORDS	Aminopeptidase	3	3.40909	0.0535967	Q9WVJ3, Q3UE92, P28843	88	19	4380	7.85885	0.999899	0.437275	48.8304
UP_SEQ_FEATURE	binding site:Fatty acid	2	2.27273	0.0541135	P11404, Q05816	76	3	4083	35.8158	1	0.8822	53.2135
GOTERM_BP_DIRECT	GO:0001764~neuron migration	3	3.40909	0.0574116	O35375, P63005, P70232	81	20	4081	7.55741	1	0.985472	57.3299
GOTERM_BP_DIRECT	GO:0035640~exploration behavior	2	2.27273	0.0576777	P61922, P70232	81	3	4081	33.5885	1	0.975776	57.5031
GOTERM_BP_DIRECT	GO:0008037~cell recognition	2	2.27273	0.0576777	K4DI58, O54901	81	3	4081	33.5885	1	0.975776	57.5031
UP_KEYWORDS	Neurotransmitter degradation	2	2.27273	0.0584263	Q64133, P61922	88	3	4380	33.1818	0.999957	0.44645	51.9176
INTERPRO	IPR000519:P-type trefoil	2	2.27273	0.0591813	A0A0J9YVE6, F8VQM5, B5THE2	88	3	4323	32.75	1	0.71943	54.7293
KEGG_PATHWAY	mmu04922:Glucagon signaling pathway	4	4.54545	0.0596953	Q924X2, P21279, Q3UKW2, P16125	48	44	2290	4.33712	0.999103	0.903571	50.3415
UP_SEQ_FEATURE	binding site:Substrate	7	7.95455	0.0637426	P08249, Q8K157, Q8R0I0, A0A0R4J138, Q8C7E4, P16125, Q8VCC1	76	155	4083	2.42623	1	0.897606	59.3138
SMART	SM00137:MAM	2	2.27273	0.064949	O35375, A0A0R4J043	39	4	2284	29.2821	0.971538	0.589259	48.0657
PIR_SUPERFAMILY	PIRSF000102:L-lactate/malate dehydrogenase	2	2.27273	0.0664769	P08249, P16125	11	4	588	26.7273	0.497367	0.497367	33.8378
UP_KEYWORDS	Transport	18	20.4545	0.0696901	Q9JIP7, Q791T5, Q91WV7, P17563, P63005, A0A0R4J275, P06728, Q9WVC8, Q08652, Q05816, Q9CQC7, F7C846, Q924X2, Q99MQ4, P12710, P11404, Q06770, Q6P9J9	88	590	4380	1.51849	0.999994	0.488396	58.4651
KEGG_PATHWAY	mmu01100:Metabolic pathways	18	20.4545	0.0698704	Q64464, P30275, A0A0J9YVE6, P63005, Q64133, Q64442, Q8R0F8, F8VPQ6, A0A0R4J275, A0A0R4J138, P16125, Q9CQC7, P08249, Q8K157, P61922, F8VQM5, B5THE2, A0A0R4J083, Q3ULD5	48	587	2290	1.46295	0.999741	0.873092	56.1211
UP_SEQ_FEATURE	domain:MAM	2	2.27273	0.0715011	O35375, A0A0R4J043	76	4	4083	26.8618	1	0.903043	63.6833
BIOCARTA	m_ccr5Pathway:Pertussis toxin-insensitive CCR5 Signaling in Macrophage	2	2.27273	0.0726226	P21279, Q3UKW2	7	6	483	23	0.903405	0.903405	47.6754
INTERPRO	IPR016040:NAD(P)-binding domain	6	6.81818	0.0738603	Q8CHS7, P08249, Q64442, P16125, Q8VCC1, E9Q5Z6	88	112	4323	2.6317	1	0.771354	63.0941
INTERPRO	IPR013320:Concanavalin A-like lectin/glucanase, subgroup	4	4.54545	0.0748203	O35375, Q8BVW3, A0A0R4J043, Q08761	88	49	4323	4.0102	1	0.750601	63.588
UP_KEYWORDS	Calcium	9	10.2273	0.075077	Q62277, O35375, Q8R0F8, Q99MQ4, A0A0R4J138, Q3UKW2, K4DI58, Q08761, Q08189	88	224	4380	1.9998	0.999998	0.4964	61.2977
GOTERM_MF_DIRECT	GO:0004177~aminopeptidase activity	3	3.40909	0.0753312	Q9WVJ3, Q3UE92, P28843	81	23	4028	6.48631	1	0.772714	63.285
GOTERM_BP_DIRECT	GO:0060316~positive regulation of ryanodine-sensitive calcium-release channel activity	2	2.27273	0.0761636	Q3UKW2, O09131	81	4	4081	25.1914	1	0.987844	68.0541
GOTERM_BP_DIRECT	GO:0046470~phosphatidylcholine metabolic process	2	2.27273	0.0761636	Q8VCU2, P06728	81	4	4081	25.1914	1	0.987844	68.0541
GOTERM_MF_DIRECT	GO:0004558~alpha-1,4-glucosidase activity	2	2.27273	0.0771362	A0A0J9YVE6, F8VQM5, B5THE2	81	4	4028	24.8642	1	0.753822	64.1915
INTERPRO	IPR002328:Alcohol dehydrogenase, zinc-type, conserved site	2	2.27273	0.0781283	Q64442, E9Q5Z6	88	4	4323	24.5625	1	0.742264	65.2435
INTERPRO	IPR000322:Glycoside hydrolase, family 31	2	2.27273	0.0781283	A0A0J9YVE6, F8VQM5, B5THE2	88	4	4323	24.5625	1	0.742264	65.2435
INTERPRO	IPR000998:MAM domain	2	2.27273	0.0781283	O35375, A0A0R4J043	88	4	4323	24.5625	1	0.742264	65.2435
UP_KEYWORDS	Mitochondrion outer membrane	4	4.54545	0.0834742	F7C846, Q924X2, Q922Q1, Q64133	88	52	4380	3.82867	1	0.517043	65.3614
BIOCARTA	m_calcineurinPathway:Effects of calcineurin in Keratinocyte Differentiation	2	2.27273	0.0842877	P21279, Q3UKW2	7	7	483	19.7143	0.934757	0.744574	53.0671
UP_KEYWORDS	Metal-binding	23	26.1364	0.0843908	Q64464, Q9D7I5, Q8BVW3, Q8R0F8, Q64442, Q8R0I0, Q3UE92, P58466, F6TFN2, Q8K411, A0A0R4J138, Q3UKW2, Q9D8X1, E9Q5Z6, Q9WVJ3, Q7M758, O35375, P21279, A0A0R4J043, P61922, Q91YP2, B7ZCI2, Q08189	88	828	4380	1.38258	1	0.503974	65.7804
KEGG_PATHWAY	mmu00052:Galactose metabolism	3	3.40909	0.0855099	A0A0J9YVE6, Q8K157, F8VQM5, B5THE2	48	24	2290	5.96354	0.999962	0.869719	63.8171
GOTERM_BP_DIRECT	GO:0006810~transport	17	19.3182	0.0869337	Q9JIP7, Q791T5, Q91WV7, P17563, P63005, A0A0R4J275, P06728, Q9WVC8, Q08652, Q05816, Q62277, F7C846, Q924X2, P12710, P11404, Q06770, Q6P9J9	81	573	4081	1.49478	1	0.989501	73.0191
GOTERM_MF_DIRECT	GO:0016787~hydrolase activity	17	19.3182	0.0940344	Q9D7I5, Q9CQ52, Q8VCU2, Q8R0F8, Q8R0I0, Q3UE92, P58466, Q8K411, A0A0R4J138, Q9WVJ3, Q7M758, Q91XA9, A0A0R4J043, P28843, Q91YP2, Q3UUI3, Q8C7E4	81	572	4028	1.47794	1	0.798351	71.7312
UP_KEYWORDS	Selenium	2	2.27273	0.0954891	P17563, P12710	88	5	4380	19.9091	1	0.533189	70.4978
INTERPRO	IPR022383:Lactate/malate dehydrogenase, C-terminal	2	2.27273	0.0966981	P08249, P16125	88	5	4323	19.65	1	0.795878	73.3174
INTERPRO	IPR015955:Lactate dehydrogenase/glycoside hydrolase, family 4, C-terminal	2	2.27273	0.0966981	P08249, P16125	88	5	4323	19.65	1	0.795878	73.3174
INTERPRO	IPR001236:Lactate/malate dehydrogenase, N-terminal	2	2.27273	0.0966981	P08249, P16125	88	5	4323	19.65	1	0.795878	73.3174
INTERPRO	IPR002345:Lipocalin	2	2.27273	0.0966981	A2AKN8, Q4FZE8	88	5	4323	19.65	1	0.795878	73.3174
INTERPRO	IPR001557:L-lactate/malate dehydrogenase	2	2.27273	0.0966981	P08249, P16125	88	5	4323	19.65	1	0.795878	73.3174
SMART	SM00060:FN3	3	3.40909	0.0978615	Q14BI5, E9QQ96, P70232	39	32	2284	5.49038	0.995739	0.664343	63.388

## Sheet: Colon_Contrl_enriched
Category	Term	Count	%	PValue	Genes	List Total	Pop Hits	Pop Total	Fold Enrichment	Bonferroni	Benjamini	FDR
UP_KEYWORDS	Signal	41	33.3333	5.38757e-07	Q9CYN9, Q8QZR3, Q9CR35, Q9ER05, A0A140T8M0, P01631, P00688, P00687, A0A075B5R2, O88312, J3KMH5, A0A075B5T2, Q8BI84, P09103, Q6P8U6, P05208, Q9DC23, Q9D8I1, A0A075B5T3, A0A0B4J1H7, P20029, A0A075B5U7, O09049, Q64285, Q8BS30, D3Z5S8, P17892, Q91W90, Q9D7Z6, P01727, Q8VCK7, Q7TPZ8, A0A0R4J0I1, P97805, Q91YW3, Q64FW2, Q99KV1, A0A075B5K2, Q9D1M7, Q3TMQ6, A0A0R4J077, P81117, Q504N0	123	661	4380	2.20877	8.67361e-05	8.67361e-05	0.000651233
UP_SEQ_FEATURE	signal peptide	31	25.2033	2.93865e-06	Q9CYN9, Q9CR35, P00687, O88312, J3KMH5, A0A0G2JE99, P09103, Q8BI84, P05208, Q9D8I1, Q9DC23, P20029, O09049, Q64285, Q8BS30, P17892, Q91W90, Q9D7Z6, P01727, Q8VCK7, Q7TPZ8, A0A0R4J0I1, P97805, Q91YW3, Q64FW2, A0A075B6A3, Q99KV1, A0A075B5K2, Q9D1M7, A0A0R4J077, Q504N0, P81117	103	507	4083	2.4238	0.000995708	0.000995708	0.00399997
KEGG_PATHWAY	mmu04972:Pancreatic secretion	10	8.13008	3.6799e-06	Q64285, B2RS76, Q9CPN9, P17892, Q9ER05, Q9D7Z6, Q6P8U6, Q7TPZ8, P05208, Q504N0	57	54	2290	7.4399	0.000275955	0.000275955	0.00386201
UP_KEYWORDS	Disulfide bond	33	26.8293	4.34628e-06	Q8CB12, Q9CR35, Q9ER05, Q8QZR3, A0A140T8M0, P01631, P00688, P00687, O88312, P70419, Q9Z1R9, Q3TR54, P09103, Q6P8U6, P05208, Q9D8I1, A0A075B5T3, Q9DC23, Q792Y9, O09049, Q64285, Q9CPN9, P17892, Q91W90, Q8VCK7, Q7TPZ8, P97805, Q2KHK6, Q91YW3, B2RS76, Q99KV1, Q3TMQ6, A0A0R4J077, Q504N0	123	506	4380	2.32238	0.000699508	0.000349815	0.00525354
GOTERM_BP_DIRECT	GO:0007586~digestion	5	4.06504	1.21595e-05	Q792Y9, Q9CPN9, P17892, Q9CR35, Q9Z1R9	103	7	4081	28.301	0.00516657	0.00516657	0.0171141
SMART	SM00406:IGv	8	6.50407	5.98844e-05	A0A140T8M0, P01631, A0A075B5U7, A0A075B5R2, A0A0B4J1H7, A0A075B5K2, P01727, A0A075B5T2, A0A075B5T3	63	39	2284	7.43671	0.00287041	0.00287041	0.0571366
KEGG_PATHWAY	mmu04141:Protein processing in endoplasmic reticulum	10	8.13008	0.000119377	Q61696, P20029, Q91YW3, Q99KV1, P17879, Q91W90, P16627, P09103, P17156, Q9DC23	57	82	2290	4.89944	0.00891384	0.0044669	0.125216
GOTERM_CC_DIRECT	GO:0034663~endoplasmic reticulum chaperone complex	5	4.06504	0.000173584	P20029, Q99KV1, P09103, Q9DC23, Q9D8I1	110	12	4246	16.0833	0.030933	0.030933	0.2138
INTERPRO	IPR013106:Immunoglobulin V-set	8	6.50407	0.000201475	A0A140T8M0, P01631, A0A075B5U7, A0A075B5R2, A0A0B4J1H7, A0A075B5K2, P01727, A0A075B5T2, A0A075B5T3	121	45	4323	6.35152	0.0433608	0.0433608	0.256163
INTERPRO	IPR001314:Peptidase S1A, chymotrypsin-type	6	4.87805	0.000216009	Q792Y9, Q9CPN9, Q9ER05, Q9CR35, Q9Z1R9, P05208	121	21	4323	10.2078	0.0464155	0.0234835	0.274619
INTERPRO	IPR018114:Peptidase S1, trypsin family, active site	6	4.87805	0.000216009	Q792Y9, Q9CPN9, Q9ER05, Q9CR35, Q9Z1R9, P05208	121	21	4323	10.2078	0.0464155	0.0234835	0.274619
SMART	SM00020:Tryp_SPc	6	4.87805	0.000231154	Q792Y9, Q9CPN9, Q9ER05, Q9CR35, Q9Z1R9, P05208	63	22	2284	9.88745	0.0110353	0.00553297	0.220386
INTERPRO	IPR013126:Heat shock protein 70 family	5	4.06504	0.000235285	Q61696, P20029, P17879, P16627, P17156	121	12	4323	14.8864	0.0504516	0.0171082	0.29909
INTERPRO	IPR018181:Heat shock protein 70, conserved site	5	4.06504	0.000235285	Q61696, P20029, P17879, P16627, P17156	121	12	4323	14.8864	0.0504516	0.0171082	0.29909
GOTERM_CC_DIRECT	GO:0005615~extracellular space	22	17.8862	0.000257831	Q792Y9, Q64285, Q9CPN9, P17892, Q9CR35, Q8QZR3, Q9D7Z6, Q8K354, Q7TPZ8, A0A0R4J0I1, P00688, P00687, Q91XA2, O88312, B2RS76, P14602, Q9Z1R9, Q6P8U6, P05208, Q3TMQ6, P81117, Q504N0	110	361	4246	2.35235	0.045601	0.0230665	0.317413
INTERPRO	IPR001254:Peptidase S1	6	4.87805	0.000273385	Q792Y9, Q9CPN9, Q9ER05, Q9CR35, Q9Z1R9, P05208	121	22	4323	9.7438	0.0583795	0.0149257	0.347445
UP_SEQ_FEATURE	domain:Ig-like	4	3.25203	0.000286701	A0A075B6A3, A0A0G2JE99, P01727, A0A075B5T3	103	6	4083	26.4272	0.0926305	0.0474405	0.389548
INTERPRO	IPR009003:Trypsin-like cysteine/serine peptidase domain	6	4.87805	0.000422045	Q792Y9, Q9CPN9, Q9ER05, Q9CR35, Q9Z1R9, P05208	121	24	4323	8.93182	0.0886876	0.0184025	0.53591
GOTERM_CC_DIRECT	GO:0005576~extracellular region	19	15.4472	0.000444046	P20029, O09049, Q64285, Q8BS30, P17892, Q9CR35, Q9D7Z6, Q7TPZ8, A0A0R4J0I1, P97805, P00687, O88312, Q6P8U6, P05208, Q3TMQ6, Q9D8I1, A0A0R4J077, P81117, Q504N0	110	296	4246	2.4777	0.0772437	0.0264409	0.546084
UP_KEYWORDS	Stress response	7	5.69106	0.000472992	Q61696, Q9D1P4, Q91YW3, P17879, P14602, P16627, P17156	123	37	4380	6.73698	0.073341	0.0250703	0.570243
GOTERM_CC_DIRECT	GO:0005788~endoplasmic reticulum lumen	7	5.69106	0.000898933	P20029, Q91YW3, Q99KV1, Q91W90, P09103, Q9DC23, Q9D8I1	110	45	4246	6.00444	0.150222	0.0398781	1.10266
UP_KEYWORDS	Secreted	18	14.6341	0.00110401	O09049, Q64285, P17892, Q9CR35, Q9D7Z6, Q7TPZ8, A0A0R4J0I1, P00688, P97805, P00687, O88312, Q6P8U6, P05208, Q3TMQ6, Q9D8I1, A0A0R4J077, P81117, Q504N0	123	269	4380	2.38281	0.162927	0.0434871	1.32636
INTERPRO	IPR007110:Immunoglobulin-like domain	10	8.13008	0.00142741	A0A140T8M0, P01631, A0A075B5U7, A0A075B5R2, A0A0B4J1H7, A0A075B6A3, A0A0G2JE99, A0A075B5K2, P01727, A0A075B5T2, A0A075B5T3	121	98	4323	3.64564	0.269667	0.0510278	1.80187
KEGG_PATHWAY	mmu04974:Protein digestion and absorption	6	4.87805	0.00154262	B2RS76, Q9CPN9, Q9ER05, Q7TPZ8, P05208, Q504N0	57	36	2290	6.69591	0.109334	0.0378601	1.60719
UP_KEYWORDS	Serine protease	6	4.87805	0.00170137	Q792Y9, Q9CPN9, Q9ER05, Q9CR35, Q9Z1R9, P05208	123	32	4380	6.67683	0.239785	0.0533546	2.03728
UP_SEQ_FEATURE	chain:Heat shock 70 kDa protein 1B	3	2.43902	0.00182405	Q61696, P17879, P16627	103	3	4083	39.6408	0.461473	0.186416	2.45451
UP_SEQ_FEATURE	chain:Heat shock 70 kDa protein 1-like	3	2.43902	0.00182405	Q61696, P17879, P16627	103	3	4083	39.6408	0.461473	0.186416	2.45451
UP_SEQ_FEATURE	chain:Heat shock 70 kDa protein 1A	3	2.43902	0.00182405	Q61696, P17879, P16627	103	3	4083	39.6408	0.461473	0.186416	2.45451
GOTERM_MF_DIRECT	GO:0004252~serine-type endopeptidase activity	6	4.87805	0.00199049	Q792Y9, Q9CPN9, Q9ER05, Q9CR35, Q9Z1R9, P05208	104	36	4028	6.45513	0.323298	0.323298	2.45837
INTERPRO	IPR003146:Proteinase inhibitor, carboxypeptidase propeptide	3	2.43902	0.00225113	B2RS76, Q7TPZ8, Q504N0	121	3	4323	35.7273	0.39092	0.0683792	2.82802
SMART	SM00631:Zn_pept	3	2.43902	0.00687898	B2RS76, Q7TPZ8, Q504N0	63	5	2284	21.7524	0.282033	0.104563	6.37539
INTERPRO	IPR009020:Proteinase inhibitor, propeptide	3	2.43902	0.00723389	B2RS76, Q7TPZ8, Q504N0	121	5	4323	21.4364	0.797545	0.180987	8.82757
INTERPRO	IPR007677:Gasdermin	3	2.43902	0.00723389	Q2KHK6, Q8CB12, Q3TR54	121	5	4323	21.4364	0.797545	0.180987	8.82757
INTERPRO	IPR000834:Peptidase M14, carboxypeptidase A	3	2.43902	0.00723389	B2RS76, Q7TPZ8, Q504N0	121	5	4323	21.4364	0.797545	0.180987	8.82757
GOTERM_MF_DIRECT	GO:0004181~metallocarboxypeptidase activity	3	2.43902	0.00908332	B2RS76, Q7TPZ8, Q504N0	104	6	4028	19.3654	0.832783	0.591079	10.7735
UP_KEYWORDS	Immunoglobulin V region	3	2.43902	0.0107264	A0A140T8M0, P01631, P01727, A0A075B5T3	123	6	4380	17.8049	0.823826	0.251273	12.2219
KEGG_PATHWAY	mmu04612:Antigen processing and presentation	5	4.06504	0.0116301	Q61696, P97371, P17879, P16627, P17156	57	37	2290	5.42911	0.584123	0.196953	11.5536
GOTERM_MF_DIRECT	GO:0003823~antigen binding	4	3.25203	0.0116822	A0A140T8M0, P01631, A0A075B6A3, P01727, A0A075B5T3	104	19	4028	8.15385	0.90006	0.535934	13.6532
UP_SEQ_FEATURE	domain:Thioredoxin 2	3	2.43902	0.011958	Q91W90, P09103, Q9DC23	103	7	4083	16.9889	0.983062	0.639243	15.1047
UP_SEQ_FEATURE	domain:Thioredoxin 1	3	2.43902	0.011958	Q91W90, P09103, Q9DC23	103	7	4083	16.9889	0.983062	0.639243	15.1047
GOTERM_BP_DIRECT	GO:0032870~cellular response to hormone stimulus	3	2.43902	0.0119693	Q61024, O70145, O70200	103	7	4081	16.9806	0.994082	0.923068	15.5908
GOTERM_BP_DIRECT	GO:0034976~response to endoplasmic reticulum stress	5	4.06504	0.0129017	P20029, Q8VE47, Q91W90, P09103, Q9DC23	103	37	4081	5.35424	0.996041	0.84181	16.7052
UP_SEQ_FEATURE	disulfide bond	18	14.6341	0.0132292	O09049, Q64285, P17892, Q9CR35, Q91W90, P01727, Q7TPZ8, A0A140T8M0, P01631, P97805, P00687, A0A075B6A3, A0A0G2JE99, P70419, P09103, P05208, A0A075B5T3, A0A0R4J077, Q504N0	103	384	4083	1.85816	0.989052	0.594618	16.5795
UP_KEYWORDS	Pyrrolidone carboxylic acid	4	3.25203	0.0147475	P00688, P00687, Q8QZR3, P01727	123	19	4380	7.49679	0.908556	0.289452	16.4388
INTERPRO	IPR013783:Immunoglobulin-like fold	10	8.13008	0.0150079	A0A140T8M0, P01631, A0A075B5U7, A0A075B5R2, A0A0B4J1H7, A0A075B6A3, A0A0G2JE99, A0A075B5K2, P01727, A0A075B5T2, A0A075B5T3	121	140	4323	2.55195	0.964091	0.309017	17.5097
GOTERM_MF_DIRECT	GO:0004806~triglyceride lipase activity	3	2.43902	0.016398	Q64285, P17892, Q6P8U6	104	8	4028	14.524	0.960862	0.555215	18.6615
GOTERM_BP_DIRECT	GO:0002181~cytoplasmic translation	3	2.43902	0.0198605	P99027, Q66JS6, P14869	103	9	4081	13.2071	0.999806	0.881924	24.6002
GOTERM_BP_DIRECT	GO:0006508~proteolysis	10	8.13008	0.0204034	Q792Y9, B2RS76, Q9CPN9, Q9ER05, Q9CR35, Q9Z1R9, Q9D7Z6, Q7TPZ8, P05208, Q504N0	103	164	4081	2.41594	0.999846	0.827326	25.186
UP_KEYWORDS	Chaperone	8	6.50407	0.0206294	Q61696, Q9D1P4, Q91YW3, Q99KV1, P17879, P14602, P09103, P17156	123	100	4380	2.84878	0.965128	0.342631	22.2733
GOTERM_MF_DIRECT	GO:0051787~misfolded protein binding	3	2.43902	0.0207347	P20029, Q91YW3, Q9DC23	104	9	4028	12.9103	0.983539	0.560161	23.0298
GOTERM_MF_DIRECT	GO:0070180~large ribosomal subunit rRNA binding	3	2.43902	0.0207347	P99027, P14869, Q9D0I8	104	9	4028	12.9103	0.983539	0.560161	23.0298
KEGG_PATHWAY	mmu05164:Influenza A	6	4.87805	0.02095	Q61696, Q91YW3, Q9CPN9, P17879, P16627, P17156	57	66	2290	3.65231	0.795655	0.272098	19.9251
GOTERM_MF_DIRECT	GO:0098641~cadherin binding involved in cell-cell adhesion	12	9.7561	0.0215785	Q8BH43, Q61696, Q8VDJ3, P20029, Q9CQ73, Q99M51, Q78PY7, E9PUQ5, P62855, Q9WVA4, P05784, J3QNK8	104	217	4028	2.14179	0.986097	0.509639	23.8542
GOTERM_CC_DIRECT	GO:0005783~endoplasmic reticulum	19	15.4472	0.0222349	P20029, Q99M51, F8VQC1, Q91W90, Q8BM55, Q8BMA6, Q9D816, O88312, Q91YW3, J3KMH5, Q64FW2, Q99KV1, Q9JI67, O70251, P09103, Q8BI84, Q9D8I1, Q9DC23, P81117, Q3U3K9	110	426	4246	1.7216	0.982921	0.556911	24.2116
UP_KEYWORDS	Protease	10	8.13008	0.0239597	Q792Y9, B2RS76, Q9CPN9, Q9ER05, Q9CR35, Q9Z1R9, Q9D7Z6, Q7TPZ8, P05208, Q504N0	123	151	4380	2.35826	0.979848	0.351978	25.4086
UP_KEYWORDS	Necrosis	3	2.43902	0.0243726	Q2KHK6, Q8CB12, Q3TR54	123	9	4380	11.8699	0.981176	0.327841	25.7891
UP_SEQ_FEATURE	domain:KH 1	3	2.43902	0.0244029	Q8VDJ3, Q61584, Q6P5B5	103	10	4083	11.8922	0.999769	0.752382	28.5584
UP_SEQ_FEATURE	domain:KH 2	3	2.43902	0.0244029	Q8VDJ3, Q61584, Q6P5B5	103	10	4083	11.8922	0.999769	0.752382	28.5584
SMART	SM00409:IG	6	4.87805	0.0279203	A0A140T8M0, P01631, A0A075B5R2, A0A075B6A3, A0A075B5K2, P01727, A0A075B5T3	63	64	2284	3.39881	0.743144	0.288094	23.6811
GOTERM_MF_DIRECT	GO:0051082~unfolded protein binding	5	4.06504	0.0310164	Q61696, P20029, Q99KV1, P16627, P17156	104	47	4028	4.12029	0.99792	0.586133	32.5381
INTERPRO	IPR003599:Immunoglobulin subtype	6	4.87805	0.0314243	A0A140T8M0, P01631, A0A075B5R2, A0A075B6A3, A0A075B5K2, P01727, A0A075B5T3	121	64	4323	3.34943	0.99911	0.50462	33.3978
GOTERM_CC_DIRECT	GO:0005913~cell-cell adherens junction	12	9.7561	0.0325513	Q8BH43, Q61696, Q8VDJ3, P20029, Q9CQ73, Q99M51, Q78PY7, E9PUQ5, P62855, Q9WVA4, P05784, J3QNK8	110	230	4246	2.01391	0.997496	0.631496	33.502
KEGG_PATHWAY	mmu03060:Protein export	3	2.43902	0.0331335	P20029, Q8BMA6, F8VQC1	57	12	2290	10.0439	0.920111	0.343732	29.7864
KEGG_PATHWAY	mmu05134:Legionellosis	4	3.25203	0.0383796	Q61696, P17879, P16627, P17156	57	31	2290	5.18393	0.946878	0.342499	33.6833
GOTERM_MF_DIRECT	GO:0052689~carboxylic ester hydrolase activity	4	3.25203	0.0399974	Q64285, P17892, Q8QZR3, Q6P8U6	104	30	4028	5.1641	0.999665	0.632147	39.9465
GOTERM_BP_DIRECT	GO:0007339~binding of sperm to zona pellucida	3	2.43902	0.0403299	Q80X50, P17879, P16627	103	13	4081	9.14339	1	0.946215	43.9789
GOTERM_MF_DIRECT	GO:0004180~carboxypeptidase activity	3	2.43902	0.0420424	B2RS76, Q7TPZ8, Q504N0	104	13	4028	8.93787	0.999779	0.607568	41.5252
UP_KEYWORDS	Chloride	3	2.43902	0.0423196	P00688, P00687, Q9D7Z6	123	12	4380	8.90244	0.999053	0.468947	40.7075
GOTERM_BP_DIRECT	GO:0012501~programmed cell death	3	2.43902	0.046299	Q2KHK6, Q8CB12, Q3TR54	103	14	4081	8.49029	1	0.944142	48.689
GOTERM_BP_DIRECT	GO:0098609~cell-cell adhesion	8	6.50407	0.0473758	Q8BH43, Q61696, Q8VDJ3, Q78PY7, E9PUQ5, P62855, Q9WVA4, J3QNK8	103	133	4081	2.38324	1	0.924565	49.4985
INTERPRO	IPR017937:Thioredoxin, conserved site	3	2.43902	0.0488138	Q91W90, P09103, Q9DC23	121	13	4323	8.24476	0.999983	0.632455	47.1149
UP_KEYWORDS	Carboxypeptidase	3	2.43902	0.0491202	B2RS76, Q7TPZ8, Q504N0	123	13	4380	8.21764	0.999699	0.491233	45.6013
UP_SEQ_FEATURE	chain:Ig lambda-1 chain V region H2020	2	1.62602	0.0493451	A0A0G2JE99, P01727	103	2	4083	39.6408	1	0.913766	49.783
UP_SEQ_FEATURE	chain:Ig lambda-1 chain V region	2	1.62602	0.0493451	A0A0G2JE99, P01727	103	2	4083	39.6408	1	0.913766	49.783
UP_SEQ_FEATURE	chain:Ig lambda-1 chain V regions MOPC 104E/RPC20/J558/S104	2	1.62602	0.0493451	A0A0G2JE99, P01727	103	2	4083	39.6408	1	0.913766	49.783
UP_SEQ_FEATURE	chain:Ig lambda-1 chain V region S43	2	1.62602	0.0493451	A0A0G2JE99, P01727	103	2	4083	39.6408	1	0.913766	49.783
UP_SEQ_FEATURE	chain:Ig lambda-2 chain C region	2	1.62602	0.0493451	A0A0G2JE99, P01727	103	2	4083	39.6408	1	0.913766	49.783
UP_SEQ_FEATURE	chain:Ig lambda-1 chain V region S178	2	1.62602	0.0493451	A0A0G2JE99, P01727	103	2	4083	39.6408	1	0.913766	49.783
KEGG_PATHWAY	mmu04975:Fat digestion and absorption	3	2.43902	0.0503087	Q64285, P17892, Q6P8U6	57	15	2290	8.03509	0.97917	0.383639	41.8263
GOTERM_MF_DIRECT	GO:0004556~alpha-amylase activity	2	1.62602	0.0504943	P00688, P00687	104	2	4028	38.7308	0.999961	0.637797	47.6534
UP_KEYWORDS	Endoplasmic reticulum	15	12.1951	0.0522411	P20029, Q99M51, Q91W90, Q8BM55, Q9D816, O88312, Q91YW3, J3KMH5, Q64FW2, Q99KV1, P09103, Q8BI84, Q9D8I1, Q9DC23, P81117, Q3U3K9	123	314	4380	1.7011	0.999823	0.485468	47.7207
UP_SEQ_FEATURE	domain:Ubiquitin-like	3	2.43902	0.052523	A2ADY9, P21126, Q8K4Z5	103	15	4083	7.92816	1	0.898352	52.0205
GOTERM_BP_DIRECT	GO:0032781~positive regulation of ATPase activity	3	2.43902	0.0525691	Q99KV1, P17156, Q9DC23	103	15	4081	7.92427	1	0.92239	53.2387
SMART	SM00632:Aamy_C	2	1.62602	0.0535654	P00688, P00687	63	2	2284	36.254	0.928821	0.410519	40.8685
INTERPRO	IPR008395:Agenet-like domain	2	1.62602	0.0547527	Q61584, Q6P5B5	121	2	4323	35.7273	0.999996	0.643823	51.1676
INTERPRO	IPR006046:Alpha amylase	2	1.62602	0.0547527	P00688, P00687	121	2	4323	35.7273	0.999996	0.643823	51.1676
INTERPRO	IPR001790:Ribosomal protein L10/acidic P0	2	1.62602	0.0547527	P14869, Q9D0I8	121	2	4323	35.7273	0.999996	0.643823	51.1676
INTERPRO	IPR022034:Fragile X mental retardation protein family	2	1.62602	0.0547527	Q61584, Q6P5B5	121	2	4323	35.7273	0.999996	0.643823	51.1676
INTERPRO	IPR002331:Pancreatic lipase	2	1.62602	0.0547527	P17892, Q6P8U6	121	2	4323	35.7273	0.999996	0.643823	51.1676
PIR_SUPERFAMILY	PIRSF000865:lipoprotein lipase, LIPH type	2	1.62602	0.0551713	P17892, Q6P8U6	12	3	588	32.6667	0.464346	0.464346	29.7797
UP_SEQ_FEATURE	short sequence motif:Prevents secretion from ER	4	3.25203	0.0556383	P20029, Q91W90, P09103, Q9DC23	103	35	4083	4.53037	1	0.884244	54.1238
GOTERM_CC_DIRECT	GO:0005815~microtubule organizing center	5	4.06504	0.0605247	Q2KHK6, Q8CB12, P05784, Q8VH51, Q3TR54	110	58	4246	3.32759	0.999988	0.800982	53.6866
GOTERM_CC_DIRECT	GO:0030687~preribosome, large subunit precursor	3	2.43902	0.0691297	P99027, P14869, Q9D0I8	110	17	4246	6.81176	0.999998	0.80225	58.6536
KEGG_PATHWAY	mmu03040:Spliceosome	6	4.87805	0.0714912	Q61696, Q8K4Z5, P17879, P16627, P17156, Q8CCF0	57	92	2290	2.62014	0.996163	0.461048	54.0894
KEGG_PATHWAY	mmu05162:Measles	4	3.25203	0.072387	Q61696, P17879, P16627, P17156	57	40	2290	4.01754	0.996431	0.430818	54.5521
UP_SEQ_FEATURE	propeptide:Activation peptide	3	2.43902	0.0729428	Q7TPZ8, P05208, Q504N0	103	18	4083	6.6068	1	0.92328	64.3336
GOTERM_BP_DIRECT	GO:1903912~negative regulation of endoplasmic reticulum stress-induced eIF2 alpha phosphorylation	2	1.62602	0.0731406	Q99M51, Q91YW3	103	3	4081	26.4142	1	0.960664	65.6685
GOTERM_MF_DIRECT	GO:0016160~amylase activity	2	1.62602	0.0747862	P00688, P00687	104	3	4028	25.8205	1	0.74968	62.1314
SMART	SM00322:KH	3	2.43902	0.0759356	Q8VDJ3, Q61584, Q6P5B5	63	17	2284	6.39776	0.977421	0.46836	52.9373
INTERPRO	IPR004087:K Homology domain	3	2.43902	0.0792421	Q8VDJ3, Q61584, Q6P5B5	121	17	4323	6.30481	1	0.752696	65.0383
UP_SEQ_FEATURE	domain:J	3	2.43902	0.0802342	Q91YW3, Q99KV1, Q9DC23	103	19	4083	6.25907	1	0.924038	67.9683
INTERPRO	IPR006048:Alpha-amylase, C-terminal all beta	2	1.62602	0.0810035	P00688, P00687	121	3	4323	23.8182	1	0.734843	65.8801
INTERPRO	IPR000734:Lipase	2	1.62602	0.0810035	P17892, Q6P8U6	121	3	4323	23.8182	1	0.734843	65.8801
INTERPRO	IPR016272:Lipoprotein lipase, LIPH	2	1.62602	0.0810035	P17892, Q6P8U6	121	3	4323	23.8182	1	0.734843	65.8801
INTERPRO	IPR013818:Lipase, N-terminal	2	1.62602	0.0810035	P17892, Q6P8U6	121	3	4323	23.8182	1	0.734843	65.8801
GOTERM_BP_DIRECT	GO:0045454~cell redox homeostasis	4	3.25203	0.0816145	Q91W90, P09103, Q9DC23, Q61941	103	41	4081	3.8655	1	0.963012	69.832
KEGG_PATHWAY	mmu04915:Estrogen signaling pathway	4	3.25203	0.090697	Q61696, P17879, P16627, P17156	57	44	2290	3.65231	0.9992	0.477041	63.1324
KEGG_PATHWAY	mmu05145:Toxoplasmosis	4	3.25203	0.090697	Q61696, P17879, P16627, P17156	57	44	2290	3.65231	0.9992	0.477041	63.1324
SMART	SM00271:DnaJ	3	2.43902	0.0922612	Q91YW3, Q99KV1, Q9DC23	63	19	2284	5.72431	0.990403	0.485089	60.2994
GOTERM_BP_DIRECT	GO:0006469~negative regulation of protein kinase activity	3	2.43902	0.0955284	Q60829, Q91YW3, P14602	103	21	4081	5.66019	1	0.971685	75.6655
GOTERM_BP_DIRECT	GO:0006986~response to unfolded protein	3	2.43902	0.0955284	Q61696, Q91YW3, P14602	103	21	4081	5.66019	1	0.971685	75.6655
INTERPRO	IPR004088:K Homology domain, type 1	3	2.43902	0.096163	Q8VDJ3, Q61584, Q6P5B5	121	19	4323	5.64115	1	0.77302	72.3908
UP_SEQ_FEATURE	domain:Thioredoxin 3	2	1.62602	0.0962781	Q91W90, Q9DC23	103	4	4083	19.8204	1	0.942723	74.7912
GOTERM_BP_DIRECT	GO:0016052~carbohydrate catabolic process	2	1.62602	0.0963235	P00688, P00687	103	4	4081	19.8107	1	0.963811	75.9649
GOTERM_MF_DIRECT	GO:0005047~signal recognition particle binding	2	1.62602	0.0984625	Q8BMA6, F8VQC1	104	4	4028	19.3654	1	0.816035	72.6073

## Sheet: Heart_GF_enriched
Category	Term	Count	%	PValue	Genes	List Total	Pop Hits	Pop Total	Fold Enrichment	Bonferroni	Benjamini	FDR
GOTERM_BP_DIRECT	GO:0010867~positive regulation of triglyceride biosynthetic process	3	10.3448	0.000373691	Q8BVZ1, Q8VCU2, Q61586	22	6	4081	92.75	0.103058	0.103058	0.495903
GOTERM_MF_DIRECT	GO:0001540~beta-amyloid binding	3	10.3448	0.000461447	P08226, P21460, Q00623	24	6	4028	83.9167	0.0411315	0.0411315	0.501918
GOTERM_CC_DIRECT	GO:0034364~high-density lipoprotein particle	3	10.3448	0.00077063	Q8VCU2, P08226, Q00623	24	8	4246	66.3438	0.0677501	0.0677501	0.836936
UP_KEYWORDS	HDL	3	10.3448	0.00081149	Q8VCU2, P08226, Q00623	29	7	4380	64.7291	0.0567756	0.0567756	0.841444
UP_KEYWORDS	Signal	11	37.931	0.00569783	Q8VCU2, J3QJU0, A0A0B4J1H7, A0A140T8M5, P08226, A0A075B5M7, P21460, Q06770, Q62356, Q00623, Q05186	29	661	4380	2.51343	0.337289	0.18593	5.77428
UP_SEQ_FEATURE	repeat:8	3	10.3448	0.00777071	O88492, P08226, Q00623	25	23	4083	21.3026	0.661877	0.661877	8.78301
PIR_SUPERFAMILY	PIRSF000437:glycerol-3-phosphate O-acyltransferase/dihydroxyacetone phosphate acyltransferase	2	6.89655	0.0101867	P98192, Q61586	4	2	588	147	0.0499063	0.0499063	4.35529
GOTERM_BP_DIRECT	GO:0010897~negative regulation of triglyceride catabolic process	2	6.89655	0.0102664	Q8BVZ1, Q8VCU2	22	2	4081	185.5	0.95036	0.777199	12.8255
GOTERM_BP_DIRECT	GO:0032489~regulation of Cdc42 protein signal transduction	2	6.89655	0.0102664	P08226, Q00623	22	2	4081	185.5	0.95036	0.777199	12.8255
GOTERM_CC_DIRECT	GO:0005615~extracellular space	7	24.1379	0.0105158	Q8VCU2, P46660, P08226, P21460, Q06770, Q62356, Q00623	24	361	4246	3.43052	0.617872	0.381835	10.8856
GOTERM_BP_DIRECT	GO:0006629~lipid metabolic process	5	17.2414	0.0114677	Q8BVZ1, P53986, P08226, Q61586, Q00623	22	177	4081	5.24011	0.965139	0.673328	14.2225
INTERPRO	IPR022284:Glycerol-3-phosphate O-acyltransferase	2	6.89655	0.0129135	P98192, Q61586	29	2	4323	149.069	0.497858	0.497858	11.91
UP_SEQ_FEATURE	repeat:5	3	10.3448	0.0147518	O88492, P08226, Q00623	25	32	4083	15.3112	0.873281	0.644023	16.0655
UP_SEQ_FEATURE	repeat:6	3	10.3448	0.0147518	O88492, P08226, Q00623	25	32	4083	15.3112	0.873281	0.644023	16.0655
GOTERM_BP_DIRECT	GO:0060192~negative regulation of lipase activity	2	6.89655	0.0153618	Q8BVZ1, Q00623	22	3	4081	123.667	0.988946	0.675752	18.6096
GOTERM_BP_DIRECT	GO:0034375~high-density lipoprotein particle remodeling	2	6.89655	0.0153618	P08226, Q00623	22	3	4081	123.667	0.988946	0.675752	18.6096
GOTERM_BP_DIRECT	GO:0044255~cellular lipid metabolic process	2	6.89655	0.0153618	P98192, Q61586	22	3	4081	123.667	0.988946	0.675752	18.6096
GOTERM_BP_DIRECT	GO:0042158~lipoprotein biosynthetic process	2	6.89655	0.0153618	P08226, Q00623	22	3	4081	123.667	0.988946	0.675752	18.6096
GOTERM_CC_DIRECT	GO:0034365~discoidal high-density lipoprotein particle	2	6.89655	0.0161665	P08226, Q00623	24	3	4246	117.944	0.773084	0.390058	16.2795
GOTERM_MF_DIRECT	GO:0060228~phosphatidylcholine-sterol O-acyltransferase activator activity	2	6.89655	0.0170367	P08226, Q00623	24	3	4028	111.889	0.790639	0.54244	17.0832
GOTERM_CC_DIRECT	GO:0005576~extracellular region	6	20.6897	0.0188887	Q8VCU2, P08226, P21460, Q06770, Q62356, Q00623	24	296	4246	3.58615	0.823655	0.351976	18.7706
INTERPRO	IPR000074:Apolipoprotein A1/A4/E	2	6.89655	0.0193098	P08226, Q00623	29	3	4323	99.3793	0.644215	0.403523	17.3238
GOTERM_BP_DIRECT	GO:0033700~phospholipid efflux	2	6.89655	0.0204323	P08226, Q00623	22	4	4081	92.75	0.997539	0.69925	24.0112
GOTERM_BP_DIRECT	GO:0043691~reverse cholesterol transport	2	6.89655	0.0204323	P08226, Q00623	22	4	4081	92.75	0.997539	0.69925	24.0112
GOTERM_BP_DIRECT	GO:0060052~neurofilament cytoskeleton organization	2	6.89655	0.0204323	P46660, A0A0R4J036	22	4	4081	92.75	0.997539	0.69925	24.0112
GOTERM_BP_DIRECT	GO:0006650~glycerophospholipid metabolic process	2	6.89655	0.0204323	P98192, Q61586	22	4	4081	92.75	0.997539	0.69925	24.0112
GOTERM_BP_DIRECT	GO:0034380~high-density lipoprotein particle assembly	2	6.89655	0.0204323	P08226, Q00623	22	4	4081	92.75	0.997539	0.69925	24.0112
GOTERM_BP_DIRECT	GO:0055091~phospholipid homeostasis	2	6.89655	0.0204323	Q61586, Q00623	22	4	4081	92.75	0.997539	0.69925	24.0112
GOTERM_BP_DIRECT	GO:0010873~positive regulation of cholesterol esterification	2	6.89655	0.0204323	P08226, Q00623	22	4	4081	92.75	0.997539	0.69925	24.0112
GOTERM_BP_DIRECT	GO:0008211~glucocorticoid metabolic process	2	6.89655	0.0204323	Q06770, Q00623	22	4	4081	92.75	0.997539	0.69925	24.0112
GOTERM_BP_DIRECT	GO:0046470~phosphatidylcholine metabolic process	2	6.89655	0.0204323	Q8VCU2, Q00623	22	4	4081	92.75	0.997539	0.69925	24.0112
GOTERM_BP_DIRECT	GO:0034372~very-low-density lipoprotein particle remodeling	2	6.89655	0.0204323	P08226, Q00623	22	4	4081	92.75	0.997539	0.69925	24.0112
UP_SEQ_FEATURE	repeat:4	3	10.3448	0.021495	O88492, P08226, Q00623	25	39	4083	12.5631	0.951218	0.634612	22.5907
GOTERM_MF_DIRECT	GO:0071813~lipoprotein particle binding	2	6.89655	0.0226536	P08226, Q00623	24	4	4028	83.9167	0.875716	0.500957	22.105
GOTERM_MF_DIRECT	GO:0008374~O-acyltransferase activity	2	6.89655	0.0226536	P98192, Q61586	24	4	4028	83.9167	0.875716	0.500957	22.105
UP_SEQ_FEATURE	signal peptide	8	27.5862	0.022743	Q8VCU2, J3QJU0, P08226, P21460, Q06770, Q62356, Q00623, Q05186	25	507	4083	2.57704	0.959147	0.550422	23.7462
UP_KEYWORDS	Glycoprotein	9	31.0345	0.0240883	Q8VCU2, J3QJU0, P46660, P08226, A0A0R4J036, Q06770, Q62356, Q00623, Q05186	29	577	4380	2.35582	0.827195	0.443004	22.4152
INTERPRO	IPR007110:Immunoglobulin-like domain	4	13.7931	0.0245539	J3QJU0, A0A0B4J1H7, A0A140T8M5, A0A075B5M7	29	98	4323	6.08445	0.732223	0.355448	21.5376
GOTERM_BP_DIRECT	GO:0031103~axon regeneration	2	6.89655	0.0254779	P08226, Q00623	22	5	4081	74.2	0.999453	0.71398	29.0555
GOTERM_BP_DIRECT	GO:0051044~positive regulation of membrane protein ectodomain proteolysis	2	6.89655	0.0254779	Q8VCU2, P08226	22	5	4081	74.2	0.999453	0.71398	29.0555
GOTERM_BP_DIRECT	GO:0070328~triglyceride homeostasis	2	6.89655	0.0254779	P08226, Q00623	22	5	4081	74.2	0.999453	0.71398	29.0555
INTERPRO	IPR004279:Perilipin	2	6.89655	0.0256661	Q8BVZ1, O88492	29	4	4323	74.5345	0.747935	0.291437	22.4061
UP_KEYWORDS	Secreted	6	20.6897	0.0258022	Q8VCU2, P08226, P21460, Q06770, Q62356, Q00623	29	269	4380	3.3688	0.847737	0.375333	23.8218
SMART	SM00406:IGv	3	10.3448	0.0259339	A0A0B4J1H7, A0A140T8M5, A0A075B5M7	16	39	2284	10.9808	0.30779	0.30779	16.3468
GOTERM_CC_DIRECT	GO:0005883~neurofilament	2	6.89655	0.026805	P46660, A0A0R4J036	24	5	4246	70.7667	0.91563	0.390129	25.6371
GOTERM_CC_DIRECT	GO:0042627~chylomicron	2	6.89655	0.0320828	P08226, Q00623	24	6	4246	58.9722	0.948563	0.390165	29.9176
INTERPRO	IPR013106:Immunoglobulin V-set	3	10.3448	0.0337413	A0A0B4J1H7, A0A140T8M5, A0A075B5M7	29	45	4323	9.93793	0.837838	0.304992	28.4576
GOTERM_BP_DIRECT	GO:0055089~fatty acid homeostasis	2	6.89655	0.035495	P08226, Q61586	22	7	4081	53	0.999973	0.777405	38.1649
GOTERM_MF_DIRECT	GO:0017127~cholesterol transporter activity	2	6.89655	0.0393208	P08226, Q00623	24	7	4028	47.9524	0.97402	0.598525	35.424
UP_SEQ_FEATURE	repeat:2	3	10.3448	0.0406951	O88492, P08226, Q00623	25	55	4083	8.90836	0.996896	0.684939	38.7122
UP_SEQ_FEATURE	repeat:1	3	10.3448	0.0406951	O88492, P08226, Q00623	25	55	4083	8.90836	0.996896	0.684939	38.7122
GOTERM_CC_DIRECT	GO:0034361~very-low-density lipoprotein particle	2	6.89655	0.0425566	P08226, Q00623	24	8	4246	44.2292	0.980889	0.43184	37.7561
INTERPRO	IPR006821:Intermediate filament head, DNA-binding domain	2	6.89655	0.0444976	P46660, A0A0R4J036	29	7	4323	42.5911	0.910405	0.33107	35.8597
GOTERM_BP_DIRECT	GO:0001523~retinoid metabolic process	2	6.89655	0.0454139	P08226, Q00623	22	9	4081	41.2222	0.999999	0.815594	46.1083
GOTERM_BP_DIRECT	GO:0033344~cholesterol efflux	2	6.89655	0.0454139	P08226, Q00623	22	9	4081	41.2222	0.999999	0.815594	46.1083
GOTERM_BP_DIRECT	GO:0042157~lipoprotein metabolic process	2	6.89655	0.0454139	P08226, Q00623	22	9	4081	41.2222	0.999999	0.815594	46.1083
GOTERM_BP_DIRECT	GO:0045104~intermediate filament cytoskeleton organization	2	6.89655	0.0454139	P46660, A0A0R4J036	22	9	4081	41.2222	0.999999	0.815594	46.1083
GOTERM_MF_DIRECT	GO:0005319~lipid transporter activity	2	6.89655	0.0502808	P08226, Q00623	24	9	4028	37.2963	0.990855	0.60895	43.0171
GOTERM_MF_DIRECT	GO:0042802~identical protein binding	5	17.2414	0.0510848	Q8BVZ1, Q99JZ0, P08226, P21460, Q00623	24	251	4028	3.34329	0.991534	0.548544	43.5408
UP_SEQ_FEATURE	region of interest:Linker 2	2	6.89655	0.0517249	P46660, A0A0R4J036	25	9	4083	36.2933	0.999378	0.707823	46.5201
GOTERM_BP_DIRECT	GO:0019915~lipid storage	2	6.89655	0.0552356	Q8BVZ1, Q00623	22	11	4081	33.7273	1	0.840733	53.0345
GOTERM_BP_DIRECT	GO:0019433~triglyceride catabolic process	2	6.89655	0.0601103	P08226, Q00623	22	12	4081	30.9167	1	0.835359	56.1573
INTERPRO	IPR013783:Immunoglobulin-like fold	4	13.7931	0.060363	J3QJU0, A0A0B4J1H7, A0A140T8M5, A0A075B5M7	29	140	4323	4.25911	0.963112	0.375878	45.5265
UP_KEYWORDS	Oxidation	2	6.89655	0.062181	P08226, Q00623	29	10	4380	30.2069	0.99017	0.603253	48.7383
UP_SEQ_FEATURE	short sequence motif:HXXXXD motif	2	6.89655	0.0628659	P98192, Q61586	25	11	4083	29.6945	0.99988	0.724537	53.4728
INTERPRO	IPR003599:Immunoglobulin subtype	3	10.3448	0.0637463	J3QJU0, A0A140T8M5, A0A075B5M7	29	64	4323	6.98761	0.969531	0.353628	47.4103
SMART	SM00563:PlsC	2	6.89655	0.0638892	P98192, Q61586	16	10	2284	28.55	0.603191	0.370072	36.14
SMART	SM00409:IG	3	10.3448	0.0642056	J3QJU0, A0A140T8M5, A0A075B5M7	16	64	2284	6.69141	0.605064	0.266316	36.2865
INTERPRO	IPR002123:Phospholipid/glycerol acyltransferase	2	6.89655	0.0690611	P98192, Q61586	29	11	4323	27.1034	0.977467	0.343885	50.2516
INTERPRO	IPR002957:Keratin, type I	2	6.89655	0.0690611	P46660, A0A0R4J036	29	11	4323	27.1034	0.977467	0.343885	50.2516
GOTERM_BP_DIRECT	GO:0006641~triglyceride metabolic process	2	6.89655	0.0745912	P08226, Q61586	22	15	4081	24.7333	1	0.871361	64.338
GOTERM_BP_DIRECT	GO:0006695~cholesterol biosynthetic process	2	6.89655	0.0841267	P08226, Q00623	22	17	4081	21.8235	1	0.881284	68.9276
GOTERM_BP_DIRECT	GO:0042594~response to starvation	2	6.89655	0.0841267	P98192, Q62356	22	17	4081	21.8235	1	0.881284	68.9276
GOTERM_MF_DIRECT	GO:0015485~cholesterol binding	2	6.89655	0.0929368	P08226, Q00623	24	17	4028	19.7451	0.99986	0.718623	65.4723
GOTERM_BP_DIRECT	GO:0050728~negative regulation of inflammatory response	2	6.89655	0.0935686	P08226, Q00623	22	19	4081	19.5263	1	0.889093	72.9284
GOTERM_BP_DIRECT	GO:0042632~cholesterol homeostasis	2	6.89655	0.0935686	P08226, Q00623	22	19	4081	19.5263	1	0.889093	72.9284
UP_KEYWORDS	Lipid droplet	2	6.89655	0.0976819	Q8BVZ1, O88492	29	16	4380	18.8793	0.999389	0.708716	65.6956

## Sheet: Heart_Contrl_enriched
Category	Term	Count	%	PValue	Genes	List Total	Pop Hits	Pop Total	Fold Enrichment	Bonferroni	Benjamini	FDR
UP_SEQ_FEATURE	metal ion-binding site:Magnesium 3	2	6.06061	0.0204373	Q9QXD6, A0A0G2JDJ5	29	3	4083	93.8621	0.949919	0.949919	21.7403
KEGG_PATHWAY	mmu01130:Biosynthesis of antibiotics	4	12.1212	0.0243408	Q9QXD6, Q8CAY6, A0A0G2JDJ5, Q9JHU9	11	152	2290	5.47847	0.567349	0.567349	19.4831
GOTERM_MF_DIRECT	GO:0003985~acetyl-CoA C-acetyltransferase activity	2	6.06061	0.0275269	Q8CAY6, Q80X81	29	4	4028	69.4483	0.935136	0.935136	26.5552
PIR_SUPERFAMILY	PIRSF000429:acetyl-CoA acetyltransferase	2	6.06061	0.0402972	Q8CAY6, Q80X81	5	6	588	39.2	0.185889	0.185889	16.3797
INTERPRO	IPR020610:Thiolase, active site	2	6.06061	0.049163	Q8CAY6, Q80X81	32	7	4323	38.5982	0.996469	0.996469	43.5303
INTERPRO	IPR002155:Thiolase	2	6.06061	0.049163	Q8CAY6, Q80X81	32	7	4323	38.5982	0.996469	0.996469	43.5303
UP_KEYWORDS	Magnesium	5	15.1515	0.0501056	Q9QXD6, Q9JJX7, Q811L6, A0A0G2JDJ5, P58465	33	193	4380	3.43853	0.996498	0.996498	44.0538
KEGG_PATHWAY	mmu00900:Terpenoid backbone biosynthesis	2	6.06061	0.0512817	Q8CAY6, A0A0G2JDJ5	11	12	2290	34.697	0.833019	0.591366	37.0575
INTERPRO	IPR007502:Helicase-associated domain	2	6.06061	0.0559924	A2A4P0, G3X8X0	32	8	4323	33.7734	0.998425	0.960315	47.9612
INTERPRO	IPR011709:Domain of unknown function DUF1605	2	6.06061	0.0559924	A2A4P0, G3X8X0	32	8	4323	33.7734	0.998425	0.960315	47.9612
INTERPRO	IPR020613:Thiolase, conserved site	2	6.06061	0.0559924	Q8CAY6, Q80X81	32	8	4323	33.7734	0.998425	0.960315	47.9612
INTERPRO	IPR020617:Thiolase, C-terminal	2	6.06061	0.0559924	Q8CAY6, Q80X81	32	8	4323	33.7734	0.998425	0.960315	47.9612
INTERPRO	IPR020616:Thiolase, N-terminal	2	6.06061	0.0559924	Q8CAY6, Q80X81	32	8	4323	33.7734	0.998425	0.960315	47.9612
KEGG_PATHWAY	mmu03040:Spliceosome	3	9.09091	0.0582431	A2A4P0, G3X8X0, Q4FK66	11	92	2290	6.78854	0.870007	0.49343	41.0049
INTERPRO	IPR002464:DNA/RNA helicase, ATP-dependent, DEAH-box type, conserved site	2	6.06061	0.0627744	A2A4P0, G3X8X0	32	9	4323	30.0208	0.999298	0.911111	52.0453
SMART	SM00847:SM00847	2	6.06061	0.0647406	A2A4P0, G3X8X0	20	8	2284	28.55	0.856441	0.856441	43.1714
GOTERM_MF_DIRECT	GO:0008026~ATP-dependent helicase activity	2	6.06061	0.0739504	A2A4P0, G3X8X0	29	11	4028	25.2539	0.999463	0.976822	57.2367
GOTERM_CC_DIRECT	GO:0005737~cytoplasm	20	60.6061	0.0851385	Q9JJX7, O89053, Q8K2F8, Q64311, Q02566, A2A4P0, P42669, A0A0G2JDJ5, Q922H1, Q91VL8, Q8CIV8, Q9QXD6, O55091, Q811L6, Q3UXZ9, Q9JHU9, Q8CAY6, G3X8X0, Q8BZH4, Q80X81	29	2261	4246	1.29512	0.99835	0.99835	60.3944
KEGG_PATHWAY	mmu01100:Metabolic pathways	6	18.1818	0.0852833	Q9QXD6, Q9CQZ6, Q8CAY6, A0A0G2JDJ5, Q9JHU9, Q61941	11	587	2290	2.12792	0.951723	0.531256	54.3384
INTERPRO	IPR016039:Thiolase-like	2	6.06061	0.0894338	Q8CAY6, Q80X81	32	13	4323	20.7837	0.999972	0.927436	65.4249

## Sheet: Spleen_GF_enriched
Category	Term	Count	%	PValue	Genes	List Total	Pop Hits	Pop Total	Fold Enrichment	Bonferroni	Benjamini	FDR
GOTERM_CC_DIRECT	GO:0005671~Ada2/Gcn5/Ada3 transcription activator complex	2	9.09091	0.0140678	Q80X50, B1AUX2	21	3	4246	134.794	0.66409	0.66409	13.8842
GOTERM_BP_DIRECT	GO:0050778~positive regulation of immune response	2	9.09091	0.0185	A0A075B5P6, A0A0A6YWR2	20	4	4081	102.025	0.918097	0.918097	19.6383
GOTERM_BP_DIRECT	GO:0050871~positive regulation of B cell activation	2	9.09091	0.0185	A0A075B5P6, A0A0A6YWR2	20	4	4081	102.025	0.918097	0.918097	19.6383
GOTERM_BP_DIRECT	GO:0008211~glucocorticoid metabolic process	2	9.09091	0.0185	E9PUR6, Q06770	20	4	4081	102.025	0.918097	0.918097	19.6383
UP_KEYWORDS	Steroid-binding	2	9.09091	0.0190471	E9PUR6, Q06770	22	4	4380	99.5455	0.75435	0.75435	18.1867
UP_SEQ_FEATURE	region of interest:CH2	2	9.09091	0.0230629	A0A075B5P6, A0A0A6YWR2	20	5	4083	81.66	0.930049	0.930049	23.3068
UP_SEQ_FEATURE	region of interest:CH3	2	9.09091	0.0230629	A0A075B5P6, A0A0A6YWR2	20	5	4083	81.66	0.930049	0.930049	23.3068
GOTERM_CC_DIRECT	GO:0042571~immunoglobulin complex, circulating	2	9.09091	0.0233416	A0A075B5P6, A0A0A6YWR2	21	5	4246	80.8762	0.83775	0.597197	22.0566
UP_KEYWORDS	Immunoglobulin C region	2	9.09091	0.0237546	A0A075B5P6, A0A0A6YWR2	22	5	4380	79.6364	0.827095	0.584181	22.1932
INTERPRO	IPR013783:Immunoglobulin-like fold	4	18.1818	0.0253101	A0A075B5M7, B1AUX2, A0A075B5P6, A0A0A6YWR2	21	140	4323	5.88163	0.700274	0.700274	21.6117
UP_SEQ_FEATURE	region of interest:CH1	2	9.09091	0.0276146	A0A075B5P6, A0A0A6YWR2	20	6	4083	68.05	0.958924	0.797329	27.2738
UP_SEQ_FEATURE	region of interest:Hinge	2	9.09091	0.0276146	E9PUR6, A0A0A6YWR2	20	6	4083	68.05	0.958924	0.797329	27.2738
GOTERM_BP_DIRECT	GO:0002455~humoral immune response mediated by circulating immunoglobulin	2	9.09091	0.0276279	A0A075B5P6, A0A0A6YWR2	20	6	4081	68.0167	0.976582	0.84697	27.9658
GOTERM_BP_DIRECT	GO:0006910~phagocytosis, recognition	2	9.09091	0.0321617	A0A075B5P6, A0A0A6YWR2	20	7	4081	58.3	0.987481	0.767802	31.8015
GOTERM_MF_DIRECT	GO:0034987~immunoglobulin receptor binding	2	9.09091	0.0325792	A0A075B5P6, A0A0A6YWR2	20	7	4028	57.5429	0.904787	0.904787	29.0912
GOTERM_MF_DIRECT	GO:0005496~steroid binding	2	9.09091	0.0417012	E9PUR6, Q06770	20	9	4028	44.7556	0.951408	0.779564	35.732
GOTERM_CC_DIRECT	GO:0009897~external side of plasma membrane	3	13.6364	0.045375	P19437, A0A075B5P6, A0A0A6YWR2	21	73	4246	8.3092	0.972002	0.696349	38.7334
GOTERM_BP_DIRECT	GO:0016064~immunoglobulin mediated immune response	2	9.09091	0.0456431	A0A075B5P6, A0A0A6YWR2	20	10	4081	40.81	0.998089	0.79092	42.1307
GOTERM_BP_DIRECT	GO:0006911~phagocytosis, engulfment	2	9.09091	0.0589465	A0A075B5P6, A0A0A6YWR2	20	13	4081	31.3923	0.999709	0.803726	50.9015
GOTERM_BP_DIRECT	GO:0050853~B cell receptor signaling pathway	2	9.09091	0.0633418	A0A075B5P6, A0A0A6YWR2	20	14	4081	29.15	0.999844	0.768094	53.5203
GOTERM_BP_DIRECT	GO:0006958~complement activation, classical pathway	2	9.09091	0.0677176	A0A075B5P6, A0A0A6YWR2	20	15	4081	27.2067	0.999917	0.738753	56
INTERPRO	IPR007110:Immunoglobulin-like domain	3	13.6364	0.0741946	A0A075B5M7, A0A075B5P6, A0A0A6YWR2	21	98	4323	6.30175	0.973305	0.836615	51.9164
GOTERM_MF_DIRECT	GO:0003823~antigen binding	2	9.09091	0.0861022	A0A075B5P6, A0A0A6YWR2	20	19	4028	21.2	0.998326	0.881265	60.722

## Sheet: Spleen_Contrl_enriched
Category	Term	Count	%	PValue	Genes	List Total	Pop Hits	Pop Total	Fold Enrichment	Bonferroni	Benjamini	FDR
UP_KEYWORDS	Disulfide bond	29	61.7021	1.11262e-15	Q9CQ52, Q3U1U4, P70269, Q64299, P07742, Q9CR35, Q9ER05, O08692, Q61646, P00688, P00687, Q9QUK9, Q62351, P08071, Q9Z1R9, Q6P8U6, P05208, Q792Y9, Q64285, Q9CPN9, O35744, Q8VCK7, Q7TPZ8, Q05117, P10605, B2RS76, Q504N0, Q91X79, P11672	47	506	4380	5.34101	1.25455e-13	1.25455e-13	1.26565e-12
GOTERM_CC_DIRECT	GO:0005615~extracellular space	25	53.1915	7.06631e-15	Q9CQ52, Q3U1U4, Q9CR35, O08692, Q61646, P00688, P00687, Q9QUK9, E9PV38, Q62351, P08071, Q9Z1R9, Q6P8U6, P05208, Q792Y9, Q64285, Q9CPN9, Q8BUE4, Q7TPZ8, P31725, P10605, B2RS76, Q504N0, P11672, Q91X79	46	361	4246	6.39227	5.32907e-13	5.32907e-13	7.4607e-12
INTERPRO	IPR001314:Peptidase S1A, chymotrypsin-type	10	21.2766	1.651e-13	Q9CQ52, Q792Y9, Q9QUK9, Q9CPN9, Q9ER05, Q9CR35, Q9Z1R9, P05208, Q91X79, Q61646	46	21	4323	44.7516	2.22872e-11	2.22872e-11	1.93545e-10
INTERPRO	IPR001254:Peptidase S1	10	21.2766	2.77265e-13	Q9CQ52, Q792Y9, Q9QUK9, Q9CPN9, Q9ER05, Q9CR35, Q9Z1R9, P05208, Q91X79, Q61646	46	22	4323	42.7174	3.74251e-11	1.87126e-11	3.25007e-10
INTERPRO	IPR009003:Trypsin-like cysteine/serine peptidase domain	10	21.2766	7.18015e-13	Q9CQ52, Q792Y9, Q9QUK9, Q9CPN9, Q9ER05, Q9CR35, Q9Z1R9, P05208, Q91X79, Q61646	46	24	4323	39.1576	9.69275e-11	3.23092e-11	8.41738e-10
SMART	SM00020:Tryp_SPc	10	21.2766	1.39133e-12	Q9CQ52, Q792Y9, Q9QUK9, Q9CPN9, Q9ER05, Q9CR35, Q9Z1R9, P05208, Q91X79, Q61646	31	22	2284	33.4897	3.61746e-11	3.61746e-11	1.141e-09
GOTERM_MF_DIRECT	GO:0004252~serine-type endopeptidase activity	11	23.4043	2.15151e-12	Q9CQ52, Q792Y9, Q9QUK9, Q9CPN9, P08071, Q9ER05, Q9CR35, Q9Z1R9, P05208, Q91X79, Q61646	46	36	4028	26.756	2.77544e-10	2.77544e-10	2.50209e-09
GOTERM_BP_DIRECT	GO:0006508~proteolysis	17	36.1702	5.25525e-12	Q9CQ52, P70269, Q792Y9, Q9CPN9, Q9ER05, Q9CR35, Q7TPZ8, Q61646, P10605, Q9QUK9, B2RS76, P08071, P97864, Q9Z1R9, P05208, Q91X79, Q504N0	46	164	4081	9.19631	1.4084e-09	1.4084e-09	6.90169e-09
UP_KEYWORDS	Protease	16	34.0426	1.1754e-11	Q9CQ52, P70269, Q792Y9, Q9CPN9, Q9ER05, Q9CR35, Q7TPZ8, P10605, Q9QUK9, B2RS76, P08071, P97864, Q9Z1R9, P05208, Q91X79, Q504N0	47	151	4380	9.87459	1.32821e-09	6.64103e-10	1.33459e-08
INTERPRO	IPR018114:Peptidase S1, trypsin family, active site	9	19.1489	1.32106e-11	Q9CQ52, Q792Y9, Q9QUK9, Q9CPN9, Q9ER05, Q9CR35, Q9Z1R9, P05208, Q91X79	46	21	4323	40.2764	1.78344e-09	4.4586e-10	1.54878e-08
UP_KEYWORDS	Serine protease	10	21.2766	1.59791e-11	Q9CQ52, Q792Y9, Q9QUK9, Q9CPN9, P08071, Q9ER05, Q9CR35, Q9Z1R9, P05208, Q91X79	47	32	4380	29.1223	1.80564e-09	6.0188e-10	1.81432e-08
GOTERM_CC_DIRECT	GO:0005576~extracellular region	19	40.4255	2.79429e-10	Q64299, Q64285, Q9CR35, O54782, O35744, O08692, Q7TPZ8, Q61646, P31725, P00687, P10605, Q62351, P08071, Q9CPX4, Q6P8U6, P05208, Q91X79, Q504N0, P11672	46	296	4246	5.92494	2.09572e-08	1.04786e-08	2.93262e-07
UP_KEYWORDS	Hydrolase	25	53.1915	3.19211e-10	Q9CQ52, P70269, Q792Y9, Q64285, Q9CPN9, Q9ER05, Q9CR35, O54782, O35744, Q7TPZ8, Q05117, P00688, P00687, P10605, O35405, Q9QUK9, E9PV38, B2RS76, P08071, P97864, Q9Z1R9, Q6P8U6, P05208, Q504N0, Q91X79	47	587	4380	3.96897	3.60708e-08	9.01771e-09	3.62441e-07
UP_KEYWORDS	Secreted	18	38.2979	5.32399e-10	Q64299, Q64285, Q9CR35, O54782, O35744, O08692, Q7TPZ8, Q61646, P00688, P31725, P00687, P10605, P08071, Q6P8U6, P05208, Q91X79, Q504N0, P11672	47	269	4380	6.23586	6.01611e-08	1.20322e-08	6.04502e-07
UP_SEQ_FEATURE	disulfide bond	18	38.2979	2.32354e-09	Q3U1U4, P70269, Q64299, Q64285, P07742, Q9CR35, O35744, Q7TPZ8, Q61646, Q05117, P00687, P10605, A0A075B6A3, Q62351, P08071, P05208, Q504N0, P11672	36	384	4083	5.31641	3.64796e-07	3.64796e-07	2.79657e-06
UP_KEYWORDS	Signal	25	53.1915	3.85663e-09	Q9CQ52, P70269, Q3U1U4, Q64299, Q64285, Q9CR35, Q9ER05, O54782, O35744, Q8VCK7, O08692, Q7TPZ8, Q61646, Q05117, P00688, P00687, P10605, P11157, E9PV38, P08071, Q6P8U6, P05208, P11672, Q504N0, Q91X79	47	661	4380	3.52464	4.35799e-07	7.26331e-08	4.37893e-06
KEGG_PATHWAY	mmu04972:Pancreatic secretion	10	21.2766	1.11081e-08	Q9CQ52, Q64285, Q9QUK9, B2RS76, Q9CPN9, Q9ER05, Q6P8U6, Q7TPZ8, P05208, Q504N0	31	54	2290	13.6798	8.44215e-07	8.44215e-07	1.16891e-05
UP_SEQ_FEATURE	signal peptide	19	40.4255	2.19204e-08	Q3U1U4, P70269, Q64299, Q64285, Q9CR35, O54782, O35744, Q8VCK7, Q7TPZ8, Q61646, Q05117, P00687, P10605, Q9QUK9, A0A075B6A3, P08071, P05208, Q504N0, P11672	36	507	4083	4.25033	3.44149e-06	1.72075e-06	2.6383e-05
UP_KEYWORDS	Zymogen	9	19.1489	5.68782e-08	Q9CQ52, P10605, P70269, Q9CR35, P97864, Q7TPZ8, P05208, Q91X79, Q504N0	47	54	4380	15.5319	6.42722e-06	9.18176e-07	6.45812e-05
KEGG_PATHWAY	mmu04974:Protein digestion and absorption	8	17.0213	2.02287e-07	Q9CQ52, Q9QUK9, B2RS76, Q9CPN9, Q9ER05, Q7TPZ8, P05208, Q504N0	31	36	2290	16.4158	1.53737e-05	7.68689e-06	0.000212867
GOTERM_BP_DIRECT	GO:0007586~digestion	5	10.6383	4.41063e-07	Q792Y9, Q9QUK9, Q9CPN9, Q9CR35, Q9Z1R9	46	7	4081	63.3696	0.000118198	5.91007e-05	0.000579245
GOTERM_MF_DIRECT	GO:0008233~peptidase activity	11	23.4043	3.71863e-06	Q9CQ52, P10605, P70269, P08071, Q9ER05, Q9CR35, P97864, Q7TPZ8, P05208, Q91X79, Q504N0	46	149	4028	6.46455	0.000479589	0.000239823	0.00432448
UP_SEQ_FEATURE	propeptide:Activation peptide	5	10.6383	1.27229e-05	P10605, P70269, Q7TPZ8, P05208, Q504N0	36	18	4083	31.5046	0.00199552	0.000665615	0.015312
GOTERM_MF_DIRECT	GO:0008236~serine-type peptidase activity	6	12.766	1.60446e-05	Q9CQ52, P08071, Q9ER05, Q9CR35, P05208, Q91X79	46	30	4028	17.513	0.00206763	0.000689685	0.0186574
GOTERM_MF_DIRECT	GO:0016787~hydrolase activity	18	38.2979	7.02519e-05	Q9CQ52, P70269, Q64285, Q9CR35, O54782, O35744, Q7TPZ8, Q05117, P00687, P10605, O35405, E9PV38, P08071, P97864, Q6P8U6, P05208, Q91X79, Q504N0	46	572	4028	2.75555	0.00902188	0.00226314	0.0816688
UP_SEQ_FEATURE	glycosylation site:N-linked (GlcNAc...)	14	29.7872	0.000125188	E9QN92, Q3U1U4, P70269, Q64299, Q64285, O54782, Q61646, Q05117, P10605, O35405, A0A075B6A3, Q62351, P08071, P11672	36	496	4083	3.20128	0.0194639	0.0049019	0.150571
INTERPRO	IPR003146:Proteinase inhibitor, carboxypeptidase propeptide	3	6.38298	0.00031581	B2RS76, Q7TPZ8, Q504N0	46	3	4323	93.9783	0.0417447	0.00849195	0.36962
UP_SEQ_FEATURE	active site:Nucleophile	6	12.766	0.000463568	P00687, P08071, D3YXP9, O54782, Q7TPZ8, Q504N0	36	78	4083	8.72436	0.0702105	0.0144539	0.556518
UP_SEQ_FEATURE	metal ion-binding site:Iron 2	3	6.38298	0.000702515	Q05117, P11157, P08071	36	5	4083	68.05	0.104465	0.0182209	0.842265
UP_SEQ_FEATURE	metal ion-binding site:Iron 1	3	6.38298	0.000702515	Q05117, P11157, P08071	36	5	4083	68.05	0.104465	0.0182209	0.842265
GOTERM_BP_DIRECT	GO:0055072~iron ion homeostasis	4	8.51064	0.000910846	E9QN92, Q544X6, P08071, P11672	46	18	4081	19.715	0.216683	0.0781806	1.18962
UP_KEYWORDS	Iron	7	14.8936	0.000948878	Q05117, E9QN92, P11157, Q544X6, P08071, Q9CPX4, P11672	47	111	4380	5.87694	0.101721	0.0133198	1.07211
INTERPRO	IPR000834:Peptidase M14, carboxypeptidase A	3	6.38298	0.00103879	B2RS76, Q7TPZ8, Q504N0	46	5	4323	56.387	0.130911	0.0231137	1.21109
INTERPRO	IPR009020:Proteinase inhibitor, propeptide	3	6.38298	0.00103879	B2RS76, Q7TPZ8, Q504N0	46	5	4323	56.387	0.130911	0.0231137	1.21109
BIOCARTA	m_pepiPathway:Proepithelin Conversion to Epithelin and Wound Repair Control	3	6.38298	0.00106749	Q9CQ52, P05208, Q91X79	8	4	483	45.2812	0.0179932	0.0179932	0.770348
SMART	SM00631:Zn_pept	3	6.38298	0.00162788	B2RS76, Q7TPZ8, Q504N0	31	5	2284	44.2065	0.0414748	0.020957	1.32719
GOTERM_MF_DIRECT	GO:0004181~metallocarboxypeptidase activity	3	6.38298	0.00177945	B2RS76, Q7TPZ8, Q504N0	46	6	4028	43.7826	0.20527	0.0449109	2.04994
UP_KEYWORDS	Iron transport	3	6.38298	0.00370705	E9QN92, P08071, P11672	47	9	4380	31.0638	0.342739	0.04556	4.12923
INTERPRO	IPR013780:Glycosyl hydrolase, family 13, all-beta	3	6.38298	0.00452205	P00688, P00687, O54782	46	10	4323	28.1935	0.457659	0.0836975	5.17484
UP_KEYWORDS	Glycosidase	4	8.51064	0.00474541	P00688, P00687, O54782, O35744	47	33	4380	11.2959	0.415798	0.0523318	5.25765
UP_KEYWORDS	Glycoprotein	14	29.7872	0.00502462	E9QN92, Q3U1U4, P70269, Q64299, Q64285, O54782, Q61646, Q05117, P10605, O35405, Q62351, P08071, P11672, Q91X79	47	577	4380	2.26115	0.43403	0.0504306	5.559
UP_SEQ_FEATURE	domain:Peptidase S1	3	6.38298	0.00609036	Q9CR35, P05208, Q61646	36	14	4083	24.3036	0.616766	0.128043	7.08886
UP_KEYWORDS	Metal-binding	17	36.1702	0.00775836	E9QN92, Q3U1U4, P32848, Q544X6, O54782, Q7TPZ8, Q05117, P00688, P31725, P00687, P11157, B2RS76, P08071, Q9CPX4, Q6P8U6, Q504N0, Q91X79	47	828	4380	1.91335	0.585264	0.0707177	8.46366
UP_KEYWORDS	Carboxypeptidase	3	6.38298	0.00782004	B2RS76, Q7TPZ8, Q504N0	47	13	4380	21.5057	0.588167	0.065965	8.52825
GOTERM_MF_DIRECT	GO:0004180~carboxypeptidase activity	3	6.38298	0.00880388	B2RS76, Q7TPZ8, Q504N0	46	13	4028	20.2074	0.680414	0.173141	9.77267
GOTERM_MF_DIRECT	GO:0005506~iron ion binding	4	8.51064	0.0133315	Q544X6, P08071, Q9CPX4, P11672	46	45	4028	7.78357	0.822951	0.219119	14.451
INTERPRO	IPR013781:Glycoside hydrolase, catalytic domain	3	6.38298	0.0161924	P00688, P00687, O35744	46	19	4323	14.8387	0.889625	0.240795	17.4189
GOTERM_BP_DIRECT	GO:0006879~cellular iron ion homeostasis	3	6.38298	0.0162624	Q62351, Q9CPX4, P11672	46	18	4081	14.7862	0.987651	0.666642	19.3724
UP_KEYWORDS	Pyrrolidone carboxylic acid	3	6.38298	0.0164723	P00688, P00687, P11672	47	19	4380	14.7144	0.846932	0.125465	17.1873
INTERPRO	IPR006046:Alpha amylase	2	4.25532	0.0207129	P00688, P00687	46	2	4323	93.9783	0.940727	0.269449	21.7595
GOTERM_CC_DIRECT	GO:0005971~ribonucleoside-diphosphate reductase complex	2	4.25532	0.0210866	P11157, P07742	46	2	4246	92.3043	0.797781	0.413042	20.0422
GOTERM_BP_DIRECT	GO:0009263~deoxyribonucleotide biosynthetic process	2	4.25532	0.0219345	P11157, P07742	46	2	4081	88.7174	0.997378	0.695406	25.2687
GOTERM_MF_DIRECT	GO:0004748~ribonucleoside-diphosphate reductase activity, thioredoxin disulfide as acceptor	2	4.25532	0.0222215	P11157, P07742	46	2	4028	87.5652	0.944917	0.303971	22.998
GOTERM_MF_DIRECT	GO:0004556~alpha-amylase activity	2	4.25532	0.0222215	P00688, P00687	46	2	4028	87.5652	0.944917	0.303971	22.998
SMART	SM00632:Aamy_C	2	4.25532	0.0261029	P00688, P00687	31	2	2284	73.6774	0.497264	0.204854	19.4995
INTERPRO	IPR017853:Glycoside hydrolase, superfamily	3	6.38298	0.02731	P00688, P00687, O35744	46	25	4323	11.2774	0.976201	0.311895	27.7204
UP_SEQ_FEATURE	region of interest:Substrate binding	4	8.51064	0.0273888	P07742, D3YXP9, Q7TPZ8, Q504N0	36	77	4083	5.89177	0.987222	0.42016	28.4122
UP_KEYWORDS	Calcium	7	14.8936	0.0282343	P00688, P31725, P00687, Q3U1U4, P32848, Q6P8U6, Q91X79	47	224	4380	2.91223	0.960694	0.19407	27.7612
INTERPRO	IPR006048:Alpha-amylase, C-terminal all beta	2	4.25532	0.0309114	P00688, P00687	46	3	4323	62.6522	0.985577	0.319791	30.7963
INTERPRO	IPR009078:Ferritin-like superfamily	2	4.25532	0.0309114	P11157, Q9CPX4	46	3	4323	62.6522	0.985577	0.319791	30.7963
GOTERM_MF_DIRECT	GO:0016160~amylase activity	2	4.25532	0.0331505	P00688, P00687	46	3	4028	58.3768	0.987079	0.383201	32.4335
UP_KEYWORDS	Lipid degradation	3	6.38298	0.0389603	Q64285, O35405, Q6P8U6	47	30	4380	9.31915	0.988786	0.244715	36.3146
GOTERM_BP_DIRECT	GO:0034097~response to cytokine	3	6.38298	0.0399797	Q05117, P07607, Q9CR35	46	29	4081	9.17766	0.999982	0.838369	41.482
INTERPRO	IPR006047:Glycosyl hydrolase, family 13, catalytic domain	2	4.25532	0.0410061	P00688, P00687	46	4	4323	46.9891	0.996491	0.37565	38.7912
INTERPRO	IPR015902:Glycoside hydrolase, family 13	2	4.25532	0.0410061	P00688, P00687	46	4	4323	46.9891	0.996491	0.37565	38.7912
GOTERM_BP_DIRECT	GO:0016052~carbohydrate catabolic process	2	4.25532	0.0433983	P00688, P00687	46	4	4081	44.3587	0.999993	0.817073	44.1604
GOTERM_MF_DIRECT	GO:0016798~hydrolase activity, acting on glycosyl bonds	3	6.38298	0.0435557	P00687, O54782, O35744	46	30	4028	8.75652	0.9968	0.436998	40.4225
GOTERM_MF_DIRECT	GO:0052689~carboxylic ester hydrolase activity	3	6.38298	0.0435557	Q64285, E9PV38, Q6P8U6	46	30	4028	8.75652	0.9968	0.436998	40.4225
KEGG_PATHWAY	mmu05133:Pertussis	3	6.38298	0.050801	Q3U1U4, Q9Z1B7, P97864	31	28	2290	7.91475	0.980982	0.733078	42.2262
SMART	SM00642:Aamy	2	4.25532	0.0515465	P00688, P00687	31	4	2284	36.8387	0.747409	0.291068	35.2091
GOTERM_BP_DIRECT	GO:0016042~lipid catabolic process	3	6.38298	0.0533686	Q64285, O35405, Q6P8U6	46	34	4081	7.82801	1	0.840757	51.3386
GOTERM_BP_DIRECT	GO:0002523~leukocyte migration involved in inflammatory response	2	4.25532	0.0539569	P31725, Q3U1U4	46	5	4081	35.487	1	0.808274	51.7342
GOTERM_BP_DIRECT	GO:0060349~bone morphogenesis	2	4.25532	0.0539569	Q05117, P08071	46	5	4081	35.487	1	0.808274	51.7342
GOTERM_MF_DIRECT	GO:0031404~chloride ion binding	2	4.25532	0.0546513	P00688, P00687	46	5	4028	35.0261	0.99929	0.482678	47.9827
GOTERM_MF_DIRECT	GO:0008199~ferric iron binding	2	4.25532	0.0546513	Q05117, Q9CPX4	46	5	4028	35.0261	0.99929	0.482678	47.9827
GOTERM_MF_DIRECT	GO:0008201~heparin binding	3	6.38298	0.060492	Q3U1U4, Q64299, P08071	46	36	4028	7.2971	0.999681	0.488695	51.5998
UP_KEYWORDS	Porphyrin biosynthesis	2	4.25532	0.0614164	Q544X6, P22907	47	6	4380	31.0638	0.999225	0.343815	51.3088
UP_KEYWORDS	Oxidoreductase	7	14.8936	0.0619714	E9QN92, P11157, P26150, P07742, Q8BUE4, D3YXP9, Q61941	47	271	4380	2.40716	0.999275	0.330765	51.6348
UP_SEQ_FEATURE	active site:Charge relay system	3	6.38298	0.0700805	Q64285, Q9CR35, P05208	36	51	4083	6.67157	0.999989	0.718456	58.2926
UP_KEYWORDS	Carbohydrate metabolism	3	6.38298	0.0742632	P00688, P00687, O35744	47	43	4380	6.50173	0.999837	0.368041	58.362
UP_KEYWORDS	Metalloprotease	3	6.38298	0.0742632	B2RS76, Q7TPZ8, Q504N0	47	43	4380	6.50173	0.999837	0.368041	58.362
GOTERM_BP_DIRECT	GO:0006826~iron ion transport	2	4.25532	0.0747332	E9QN92, Q9CPX4	46	7	4081	25.3478	1	0.875274	63.9433
GOTERM_MF_DIRECT	GO:0004190~aspartic-type endopeptidase activity	2	4.25532	0.0756844	P70269, P97864	46	7	4028	25.0186	0.999961	0.542035	59.9587
GOTERM_MF_DIRECT	GO:0016491~oxidoreductase activity	7	14.8936	0.0795871	E9QN92, P11157, P26150, P07742, Q8BUE4, D3YXP9, Q61941	46	272	4028	2.25352	0.999977	0.534278	61.8813
UP_KEYWORDS	Heme biosynthesis	2	4.25532	0.0810564	Q544X6, P22907	47	8	4380	23.2979	0.999929	0.379728	61.7024
GOTERM_BP_DIRECT	GO:0005975~carbohydrate metabolic process	4	8.51064	0.0839416	P00687, D3YXP9, O54782, O35744	46	94	4081	3.77521	1	0.881884	68.3817
GOTERM_BP_DIRECT	GO:0006783~heme biosynthetic process	2	4.25532	0.0849533	Q544X6, P22907	46	8	4081	22.1793	1	0.862311	68.8373
GOTERM_MF_DIRECT	GO:0004806~triglyceride lipase activity	2	4.25532	0.0860286	Q64285, Q6P8U6	46	8	4028	21.8913	0.999991	0.538661	64.8709
KEGG_PATHWAY	mmu00240:Pyrimidine metabolism	3	6.38298	0.0993248	P11157, P07607, P07742	31	41	2290	5.40519	0.999647	0.862976	66.7401

## Sheet: Brains_GF_enriched
Category	Term	Count	%	PValue	Genes	List Total	Pop Hits	Pop Total	Fold Enrichment	Bonferroni	Benjamini	FDR
GOTERM_CC_DIRECT	GO:0009897~external side of plasma membrane	2	28.5714	0.0588368	O55186, A0A0A6YWR2	6	69	5726	27.6618	0.736592	0.736592	37.7854

[truncated: 1 more sheets: Brains_Contrl_enriched]
